# Supplementary material
Source: PubMed Central journal article supplement (PMC7309699)

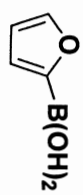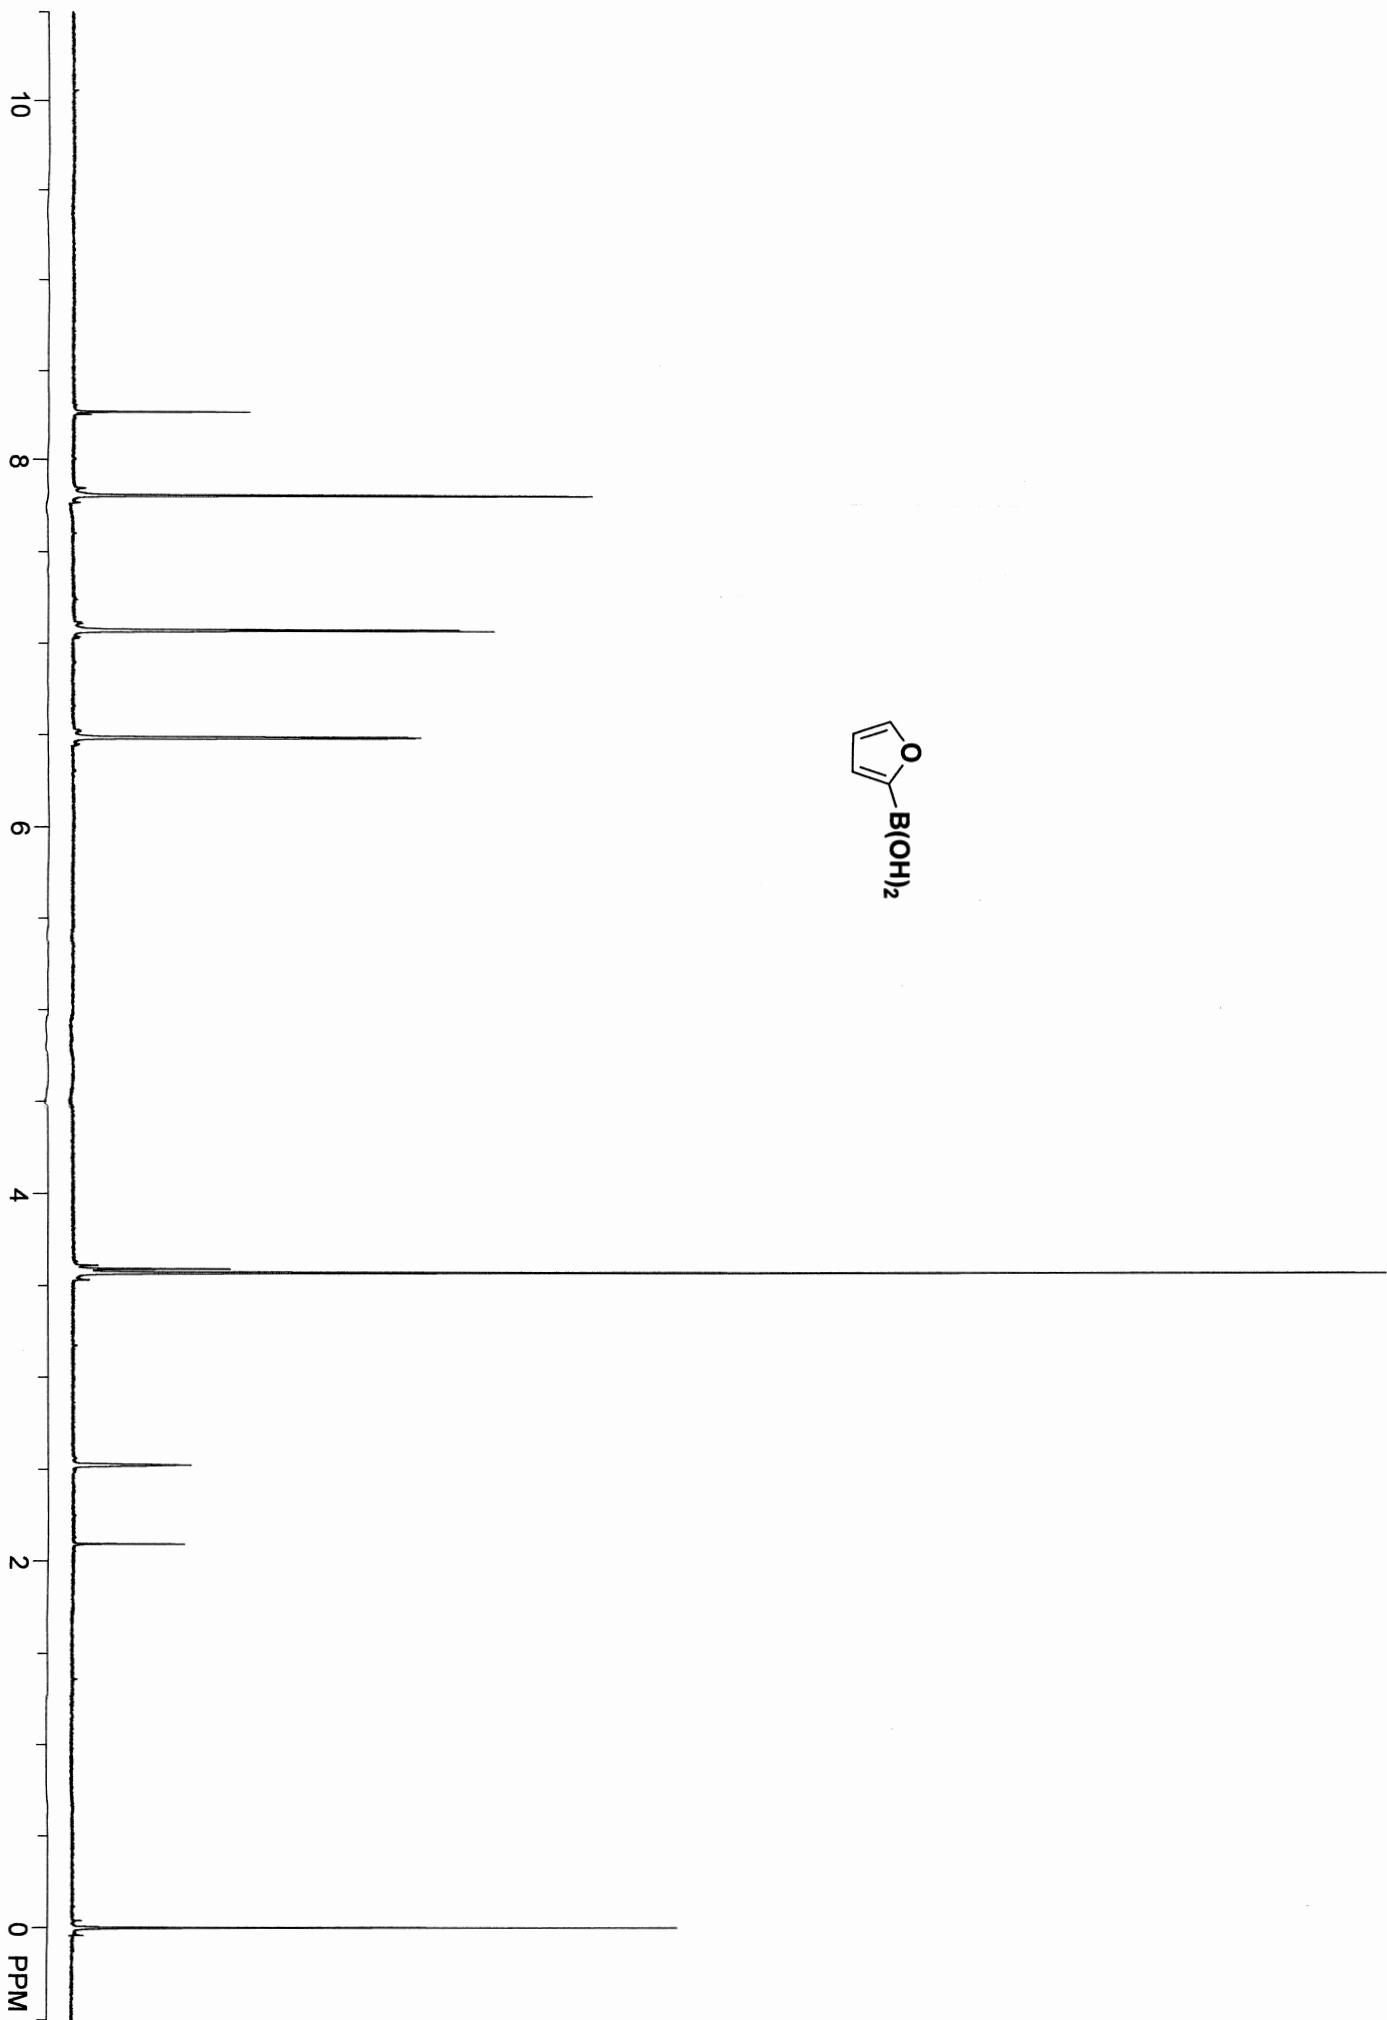

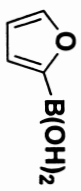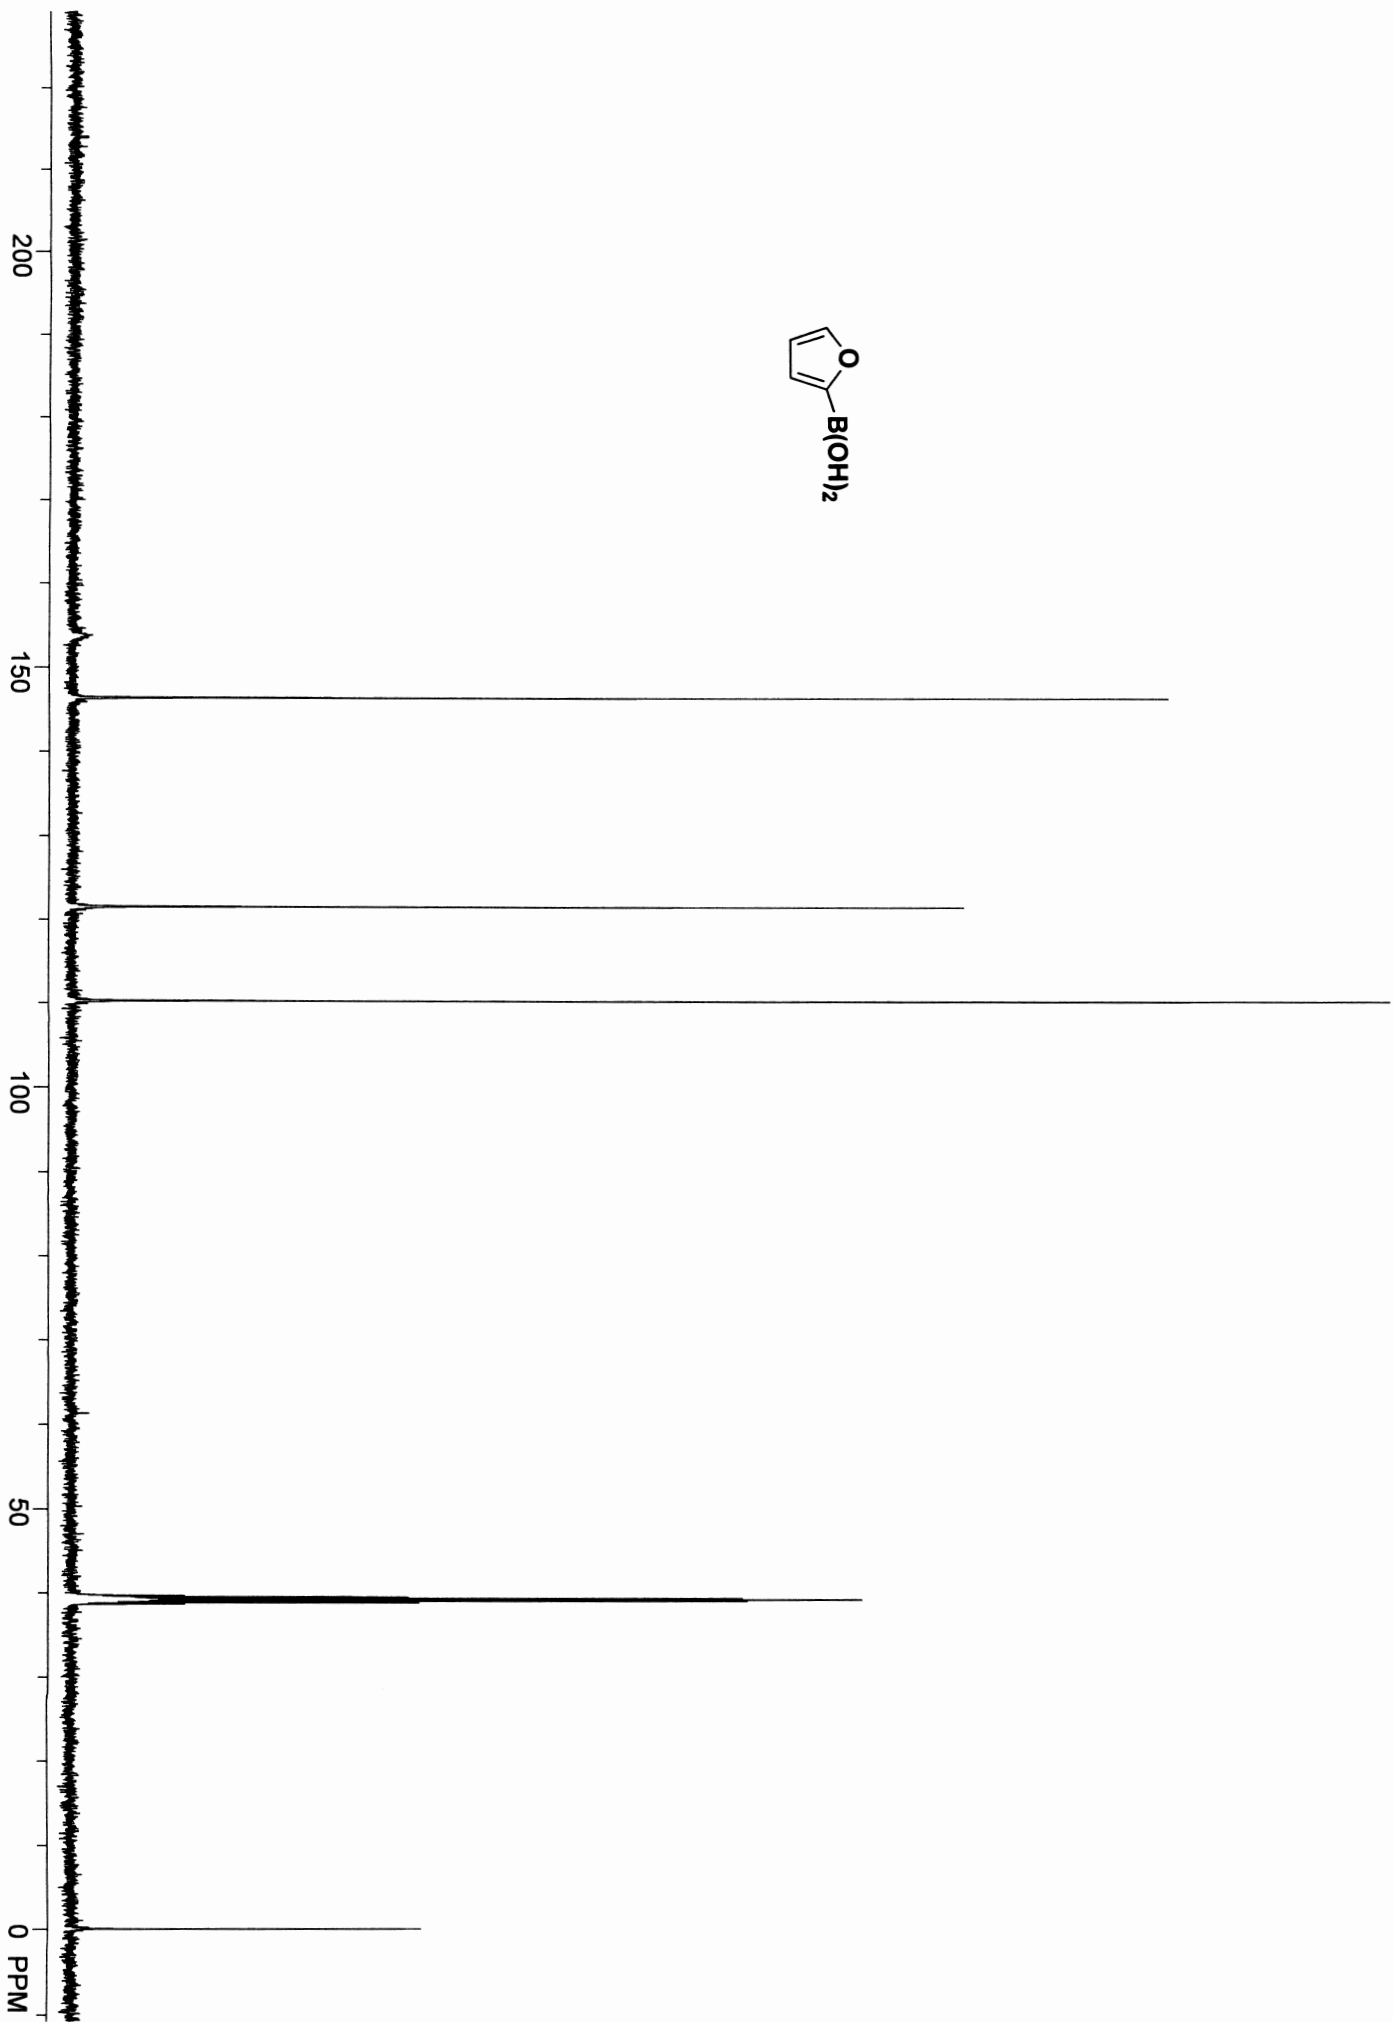

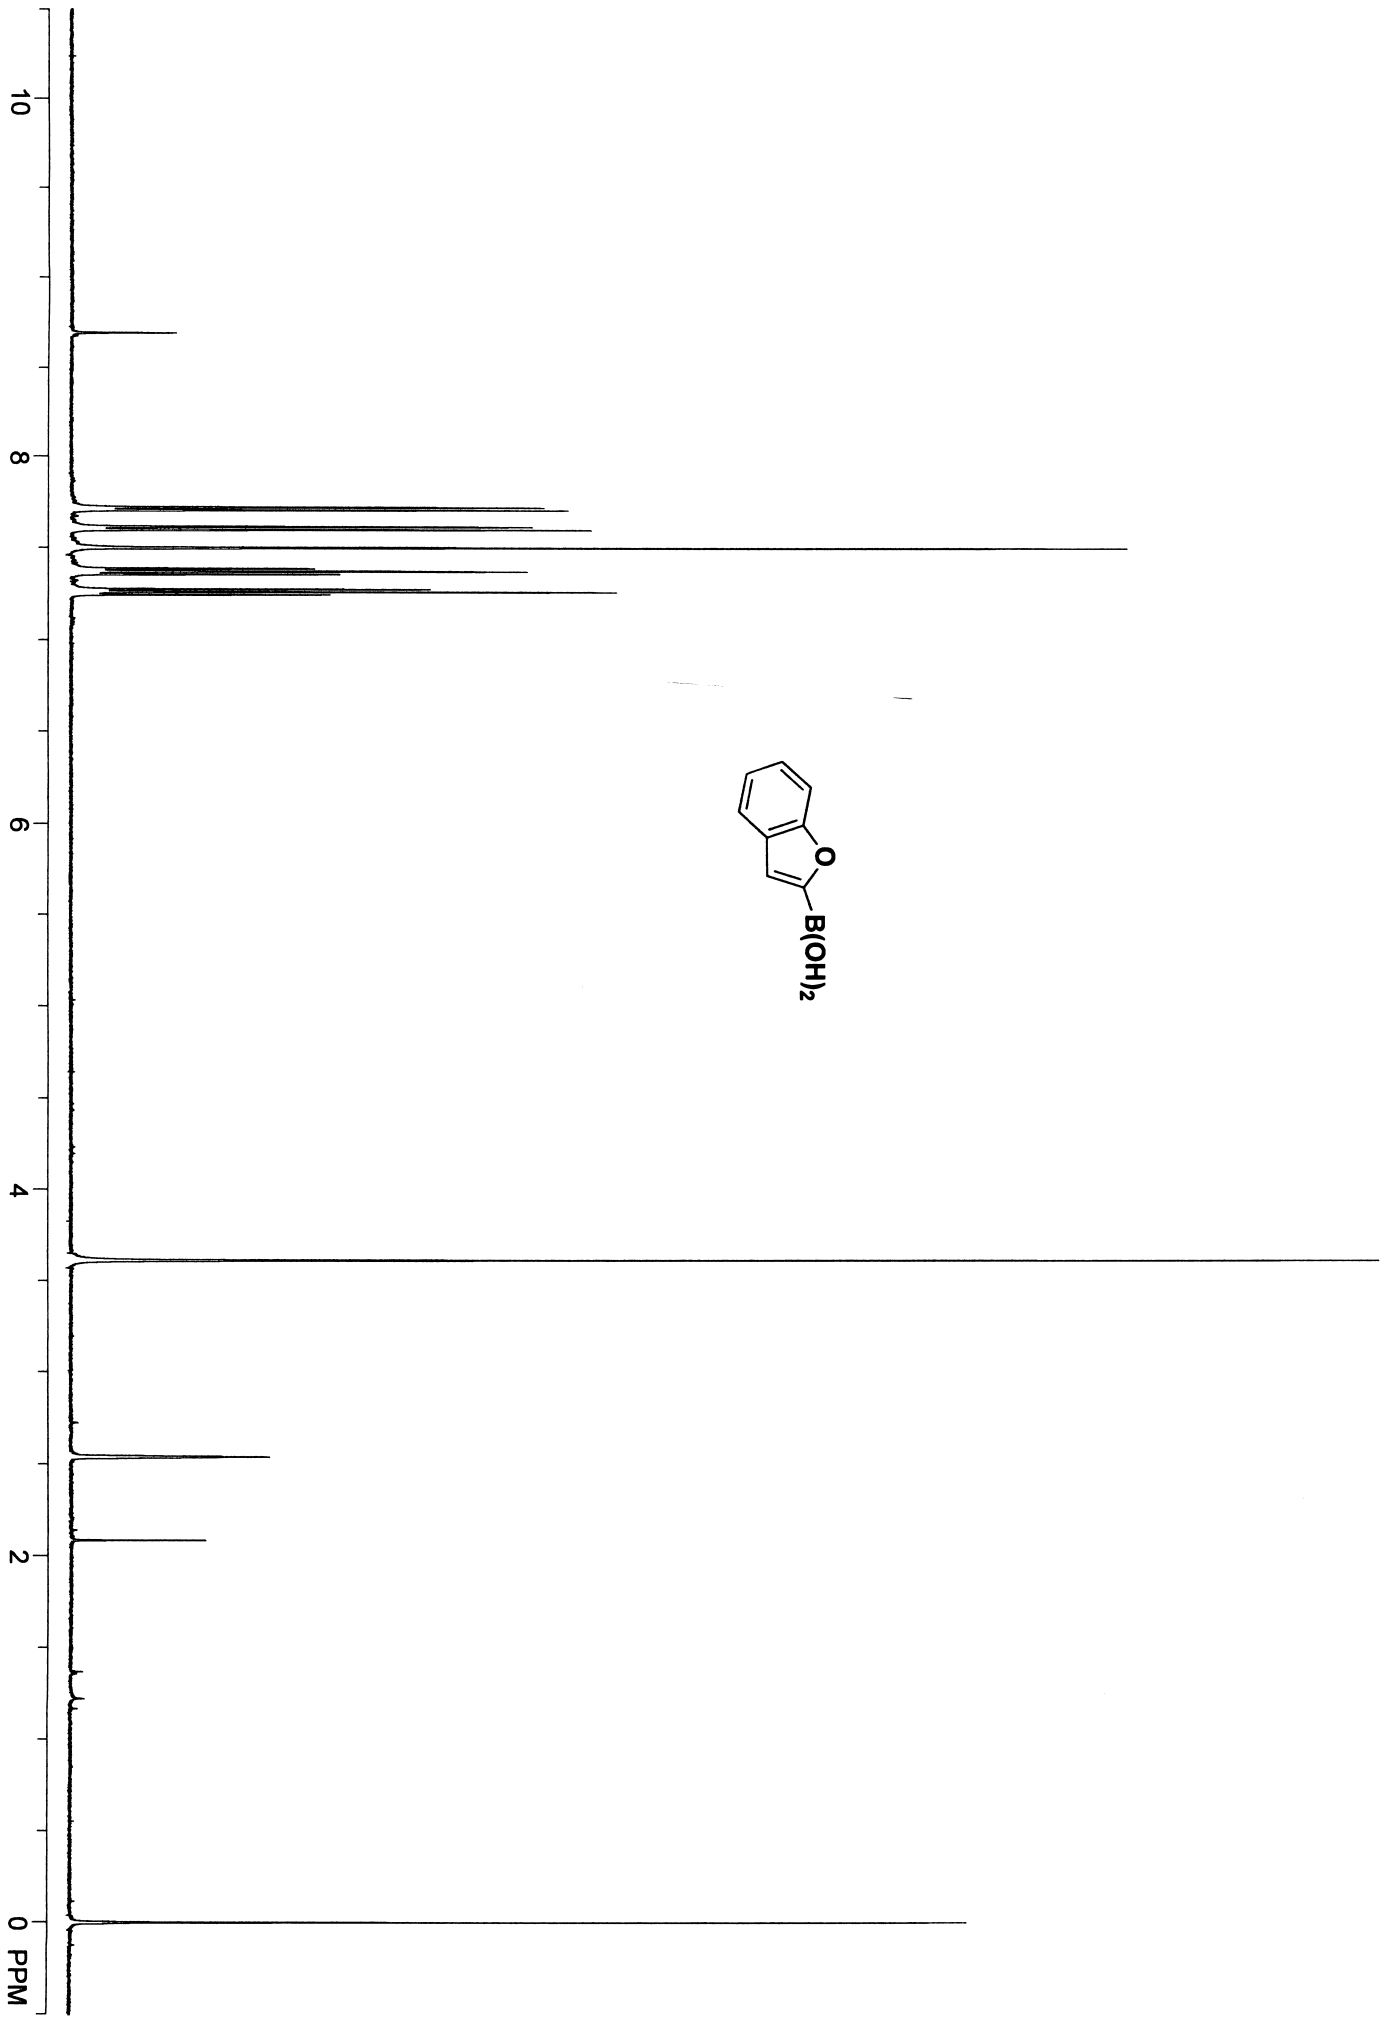

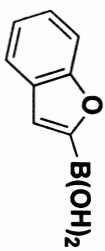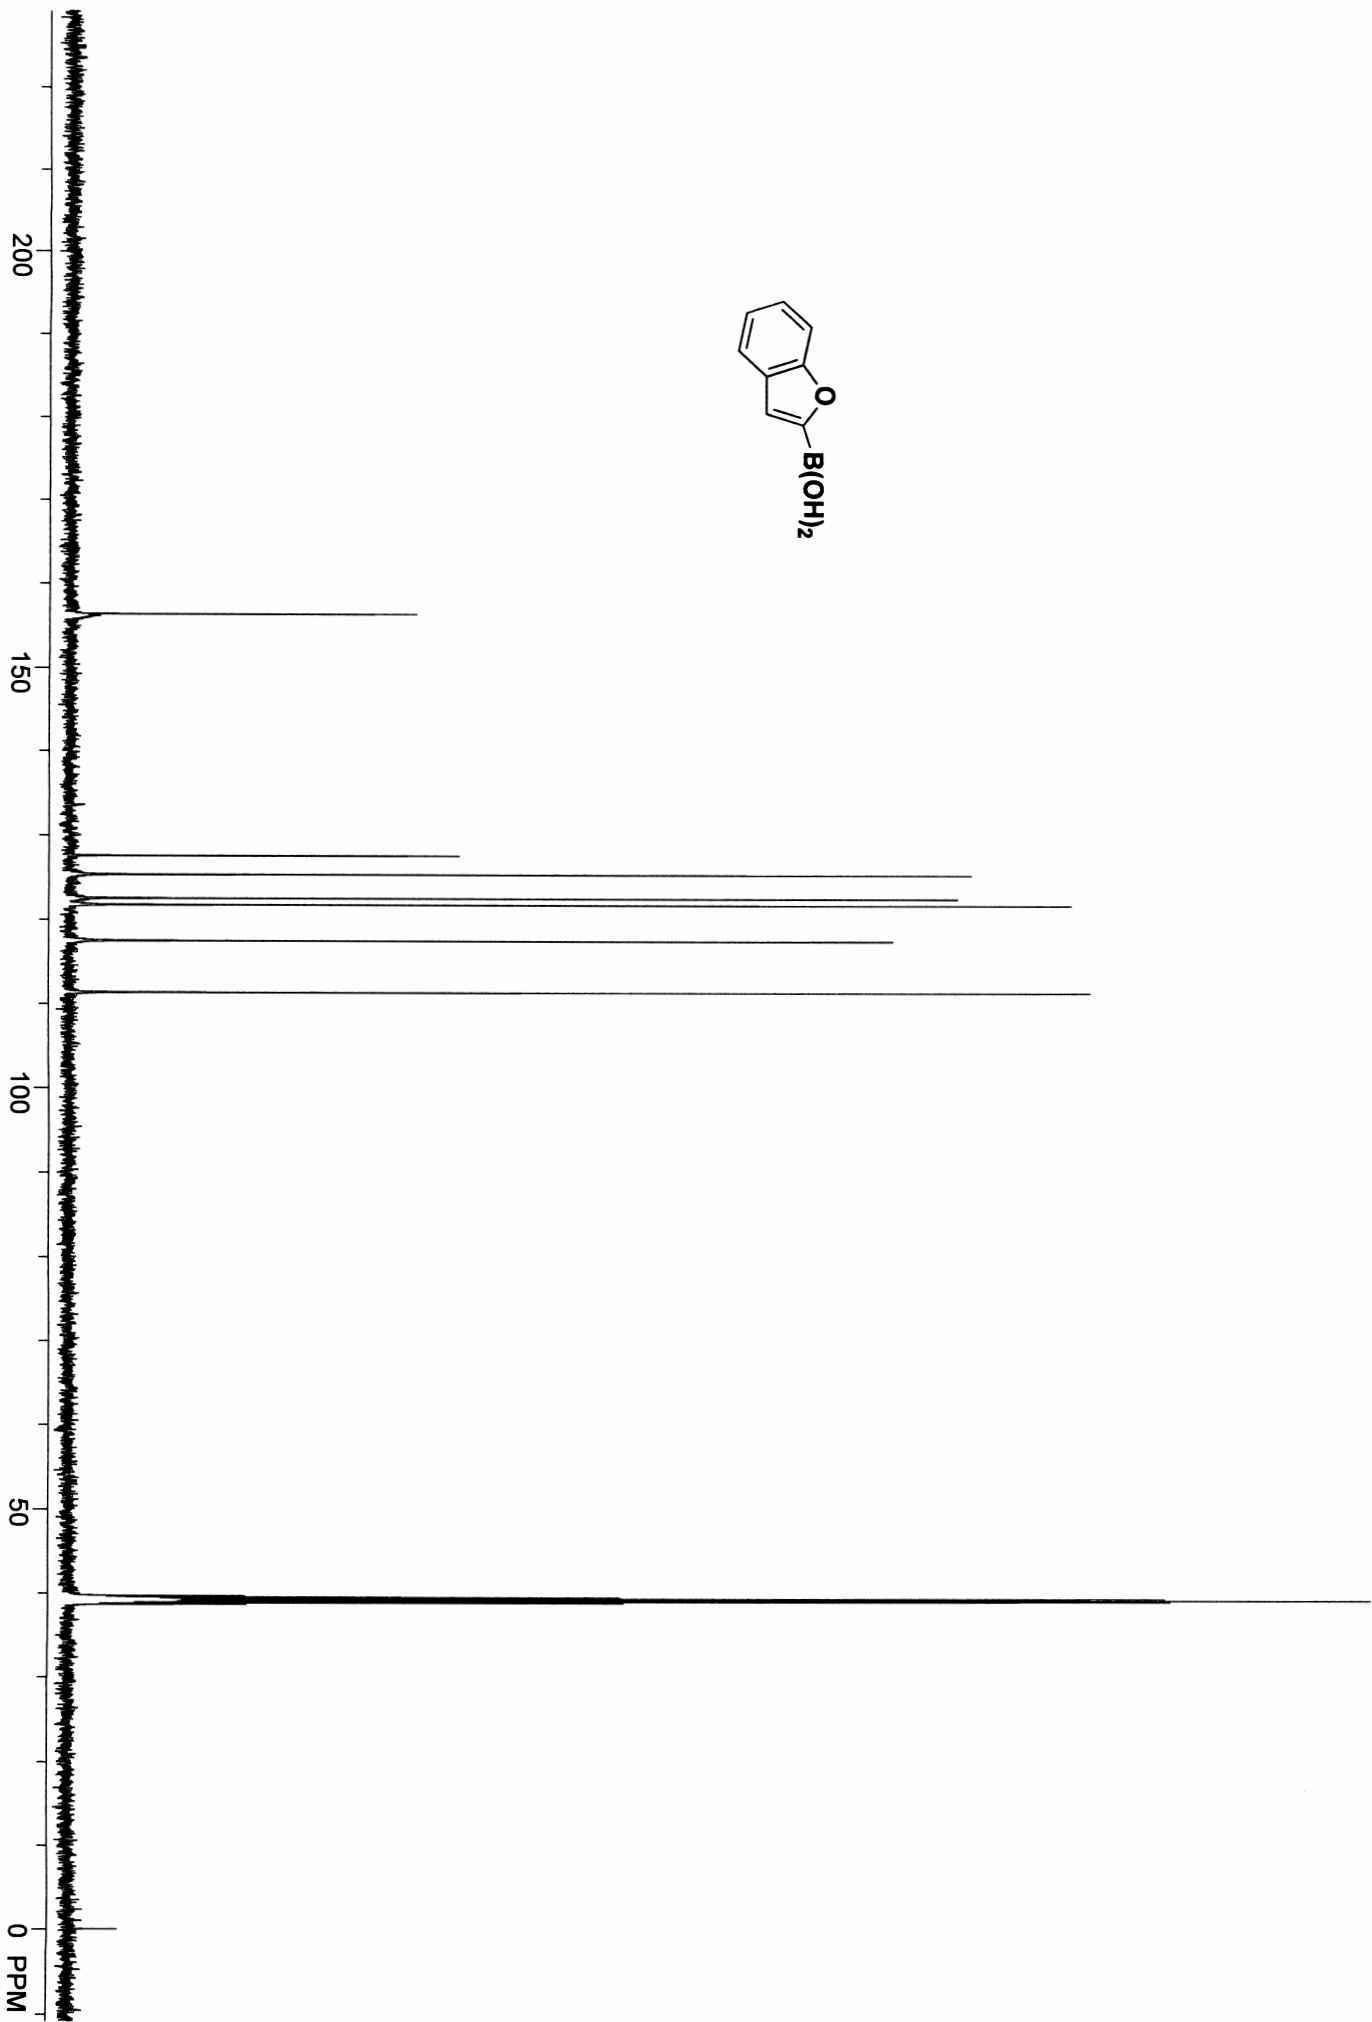

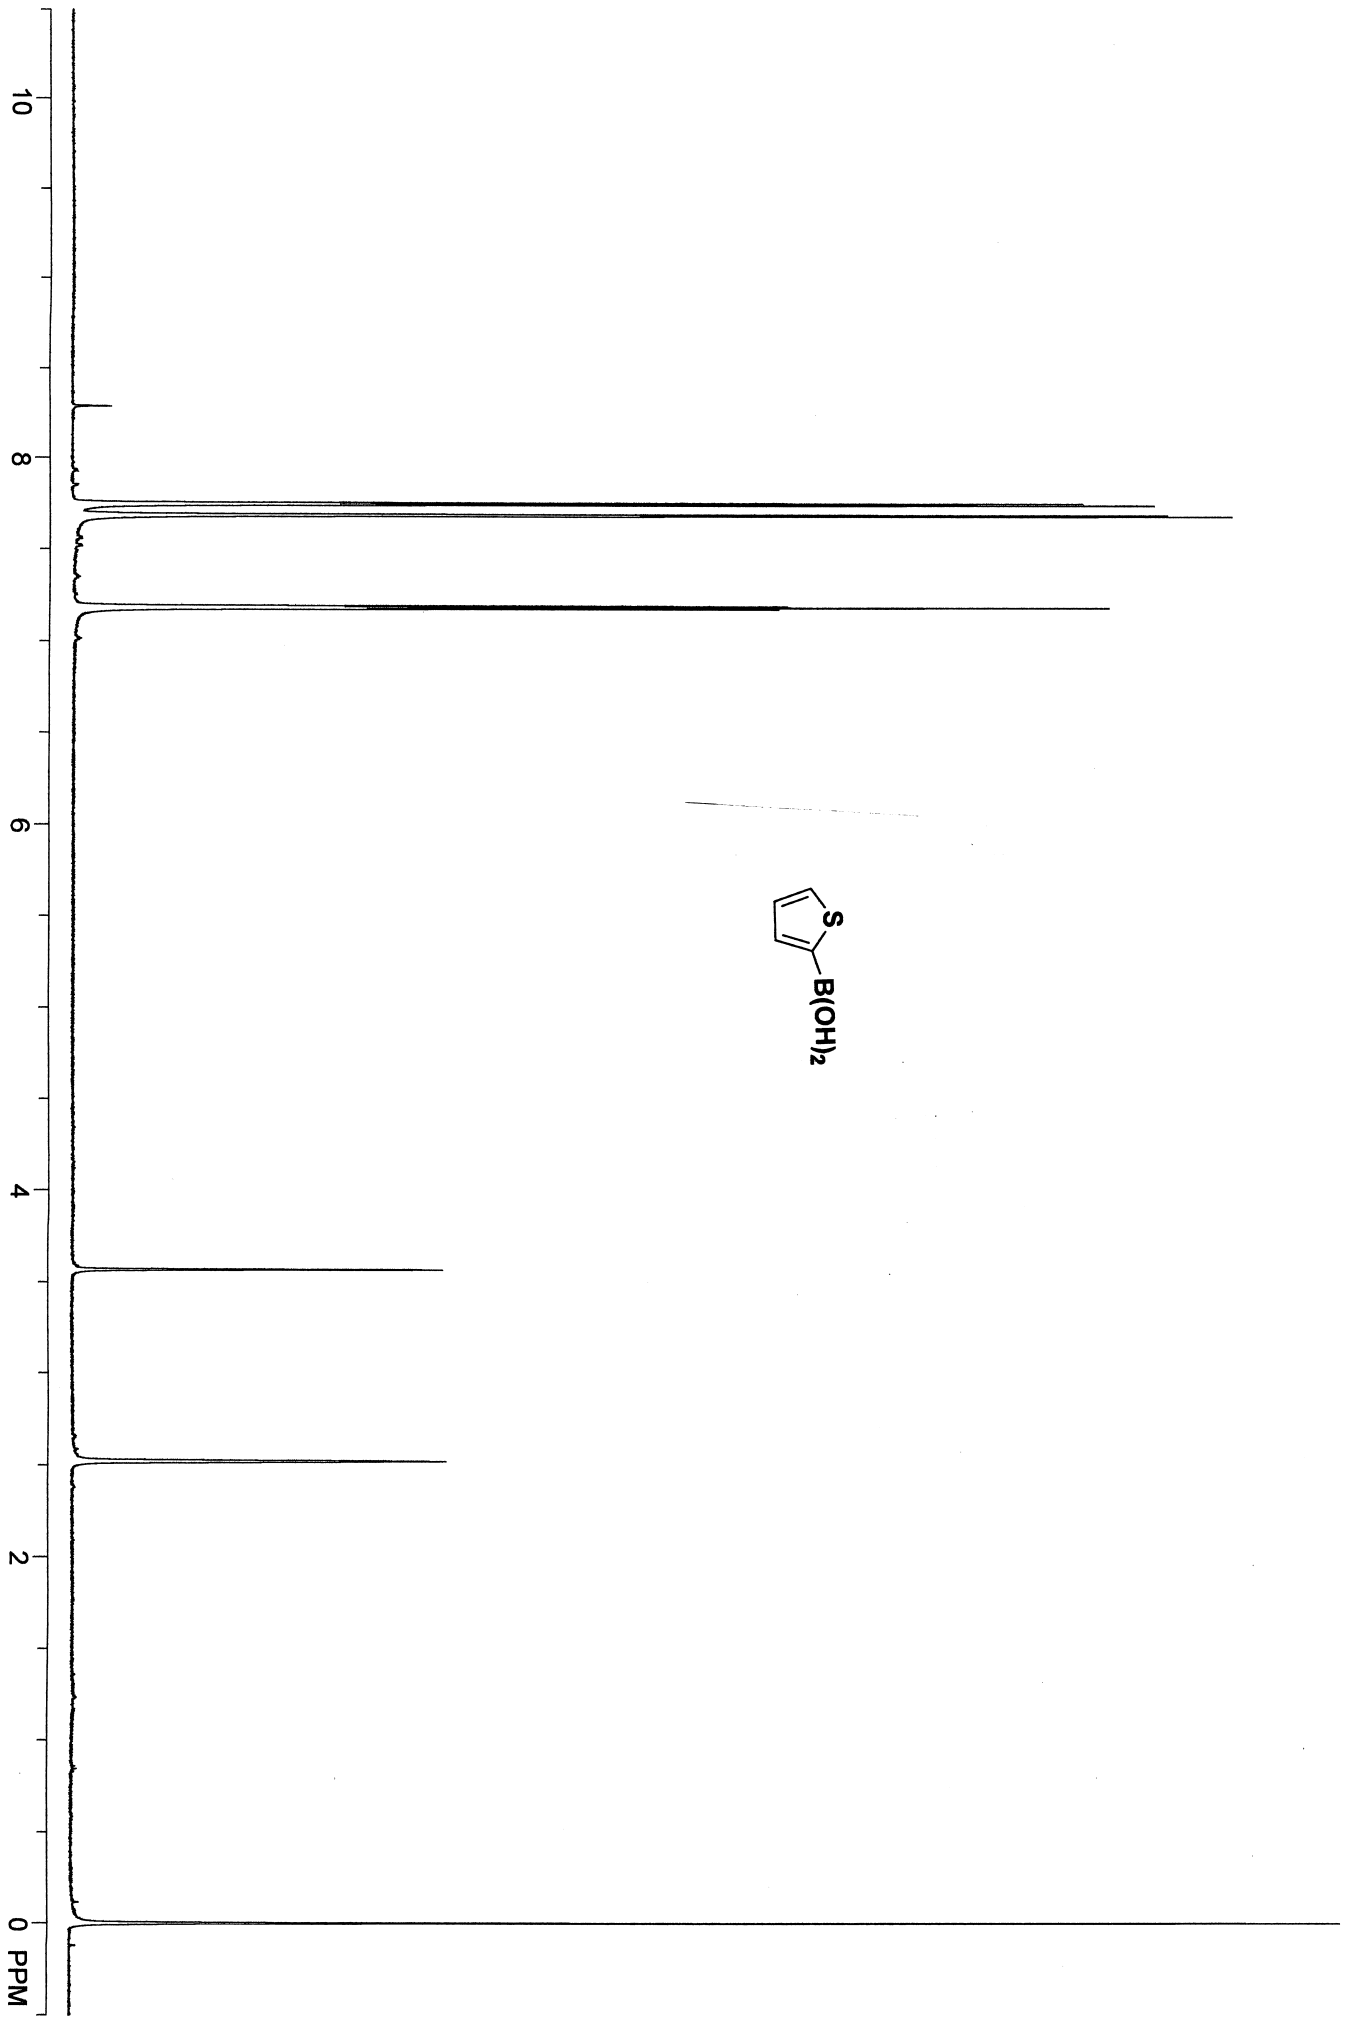

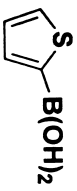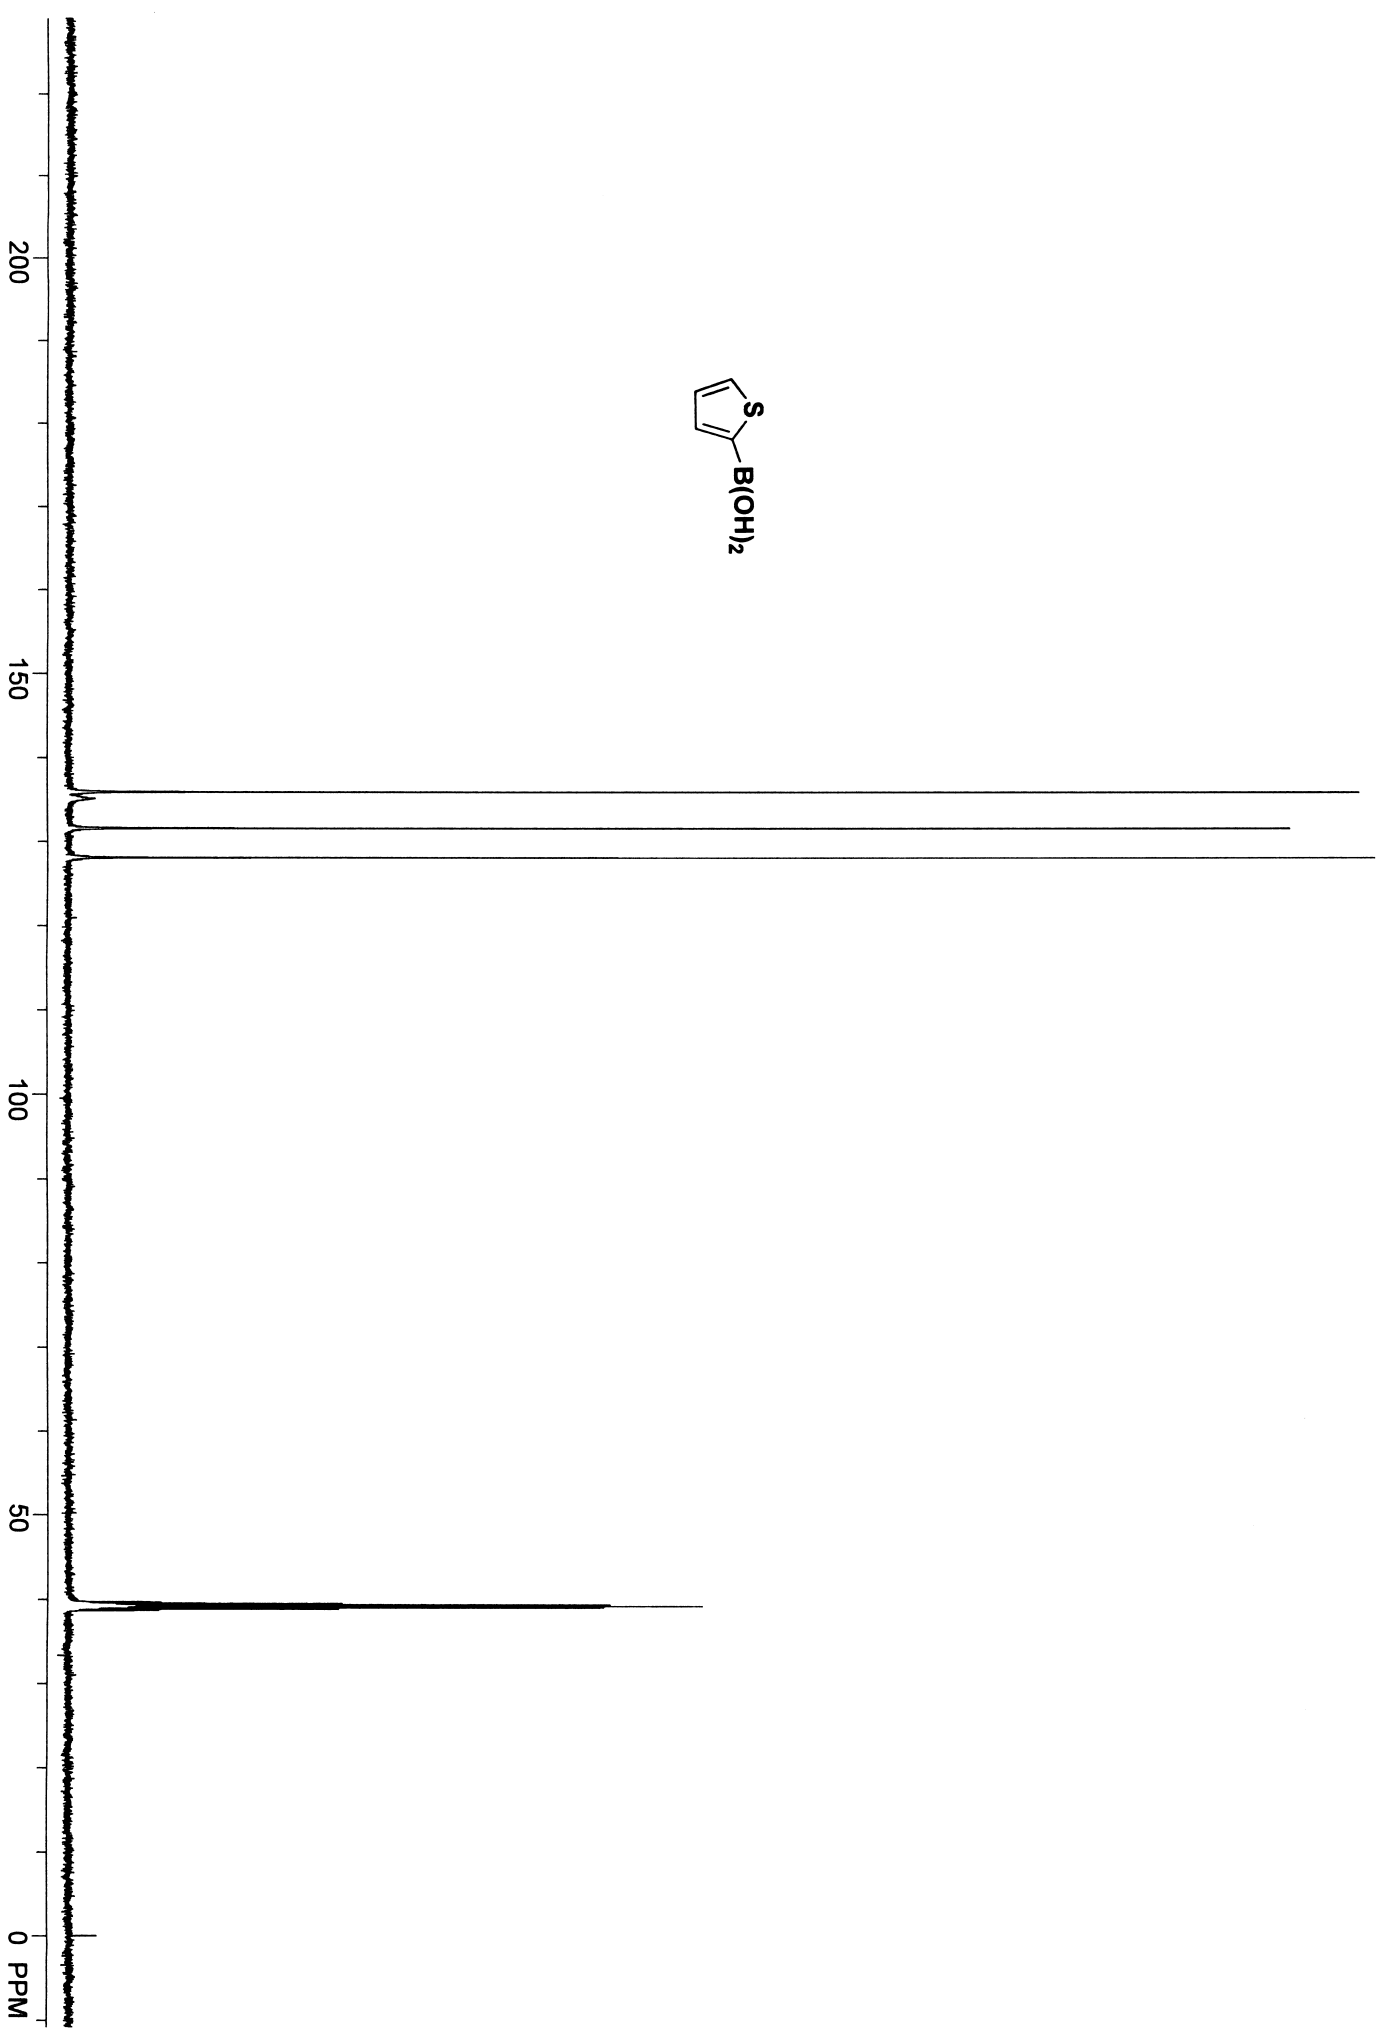

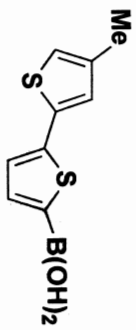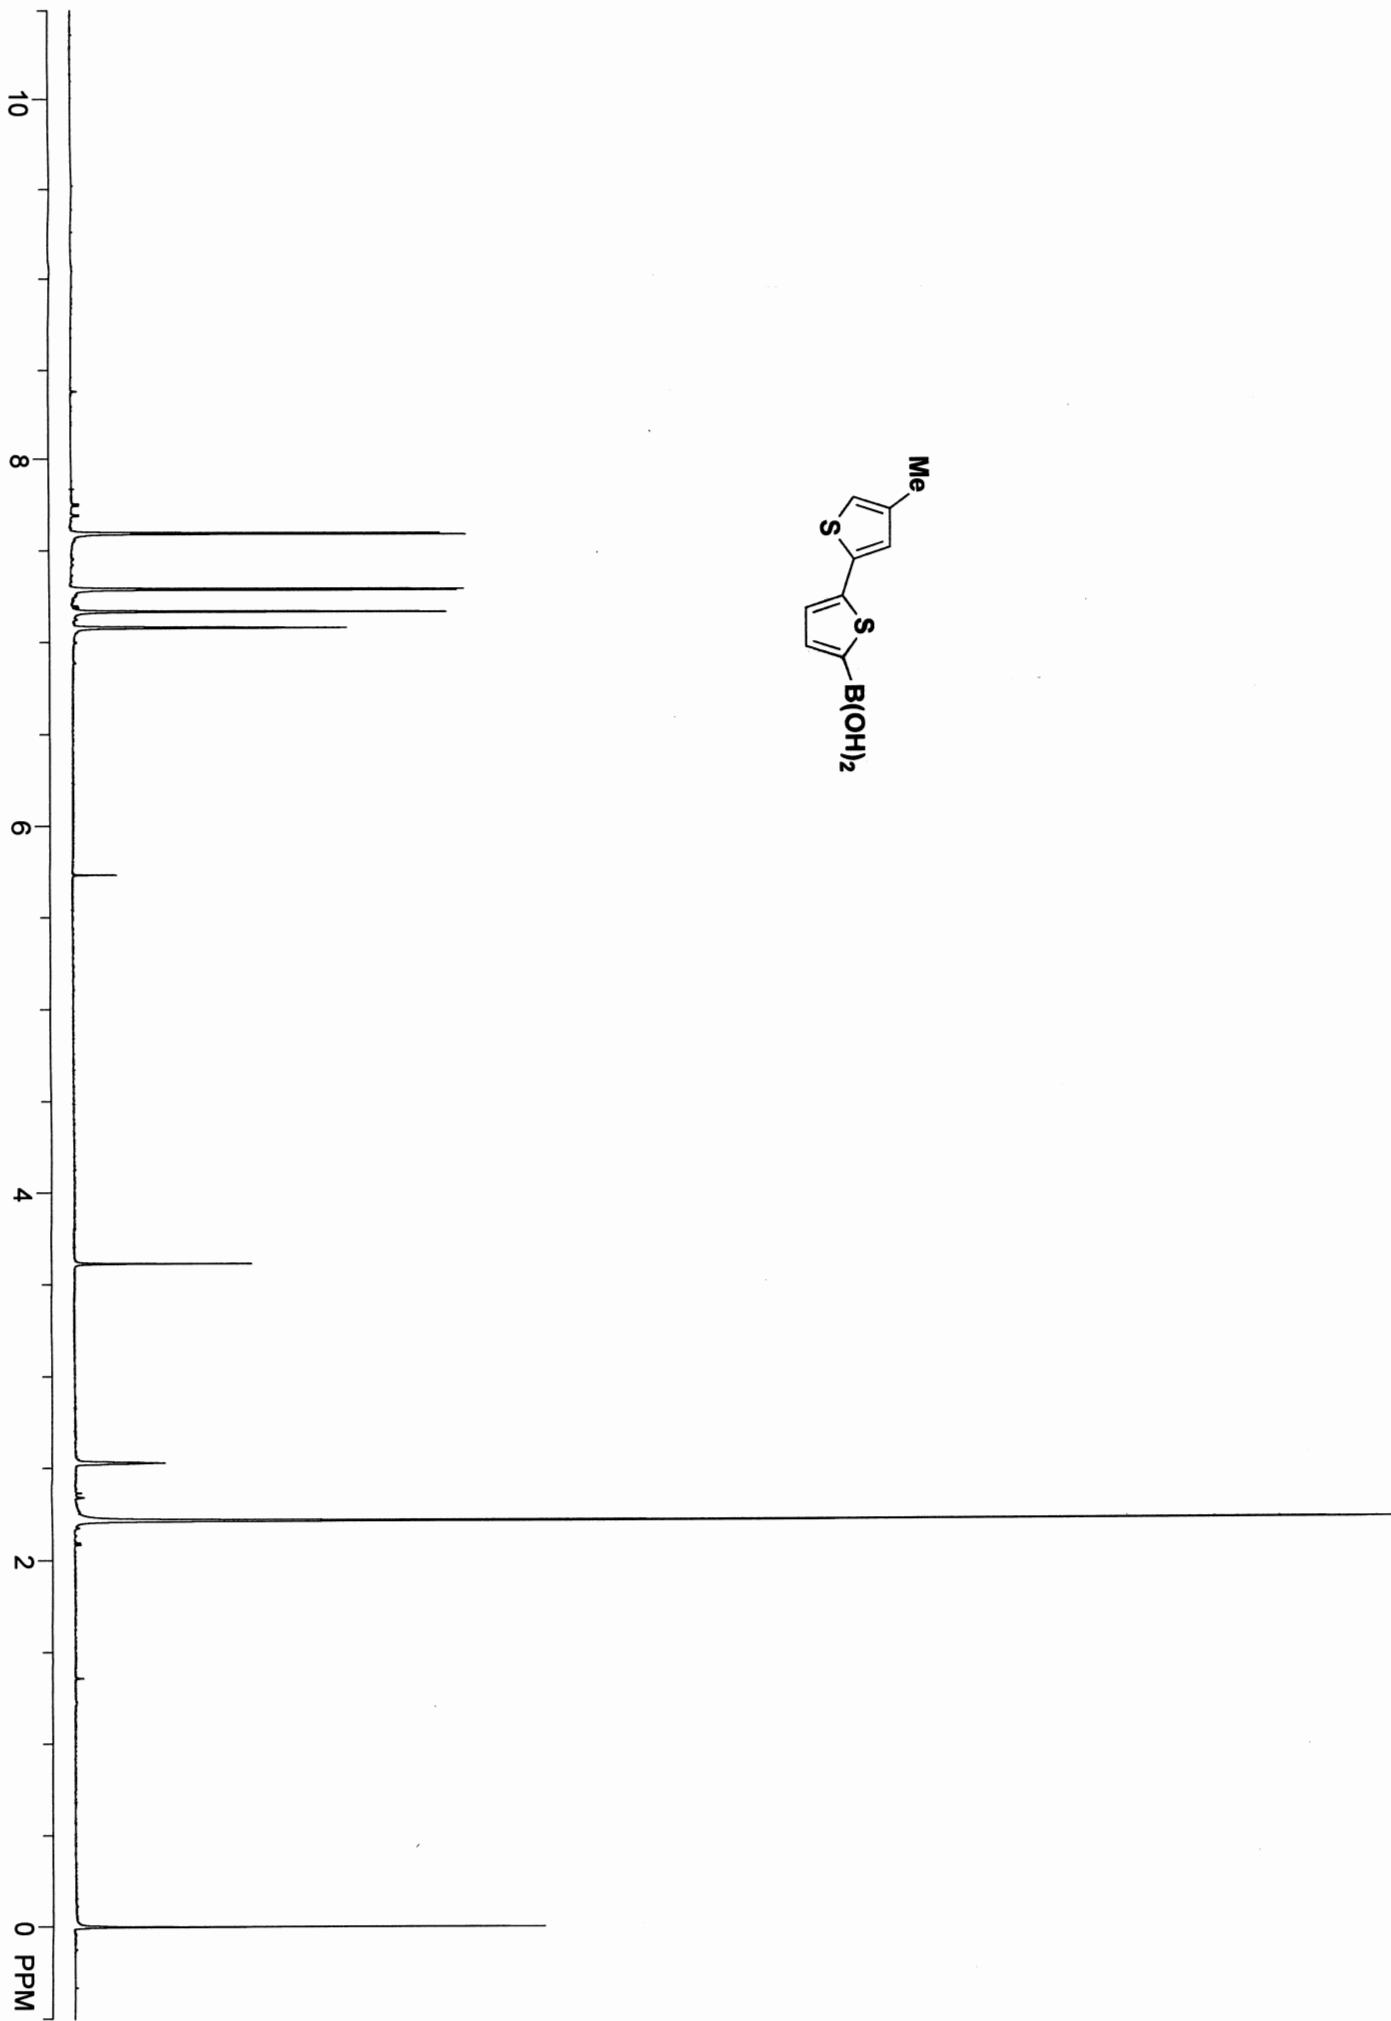

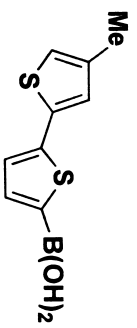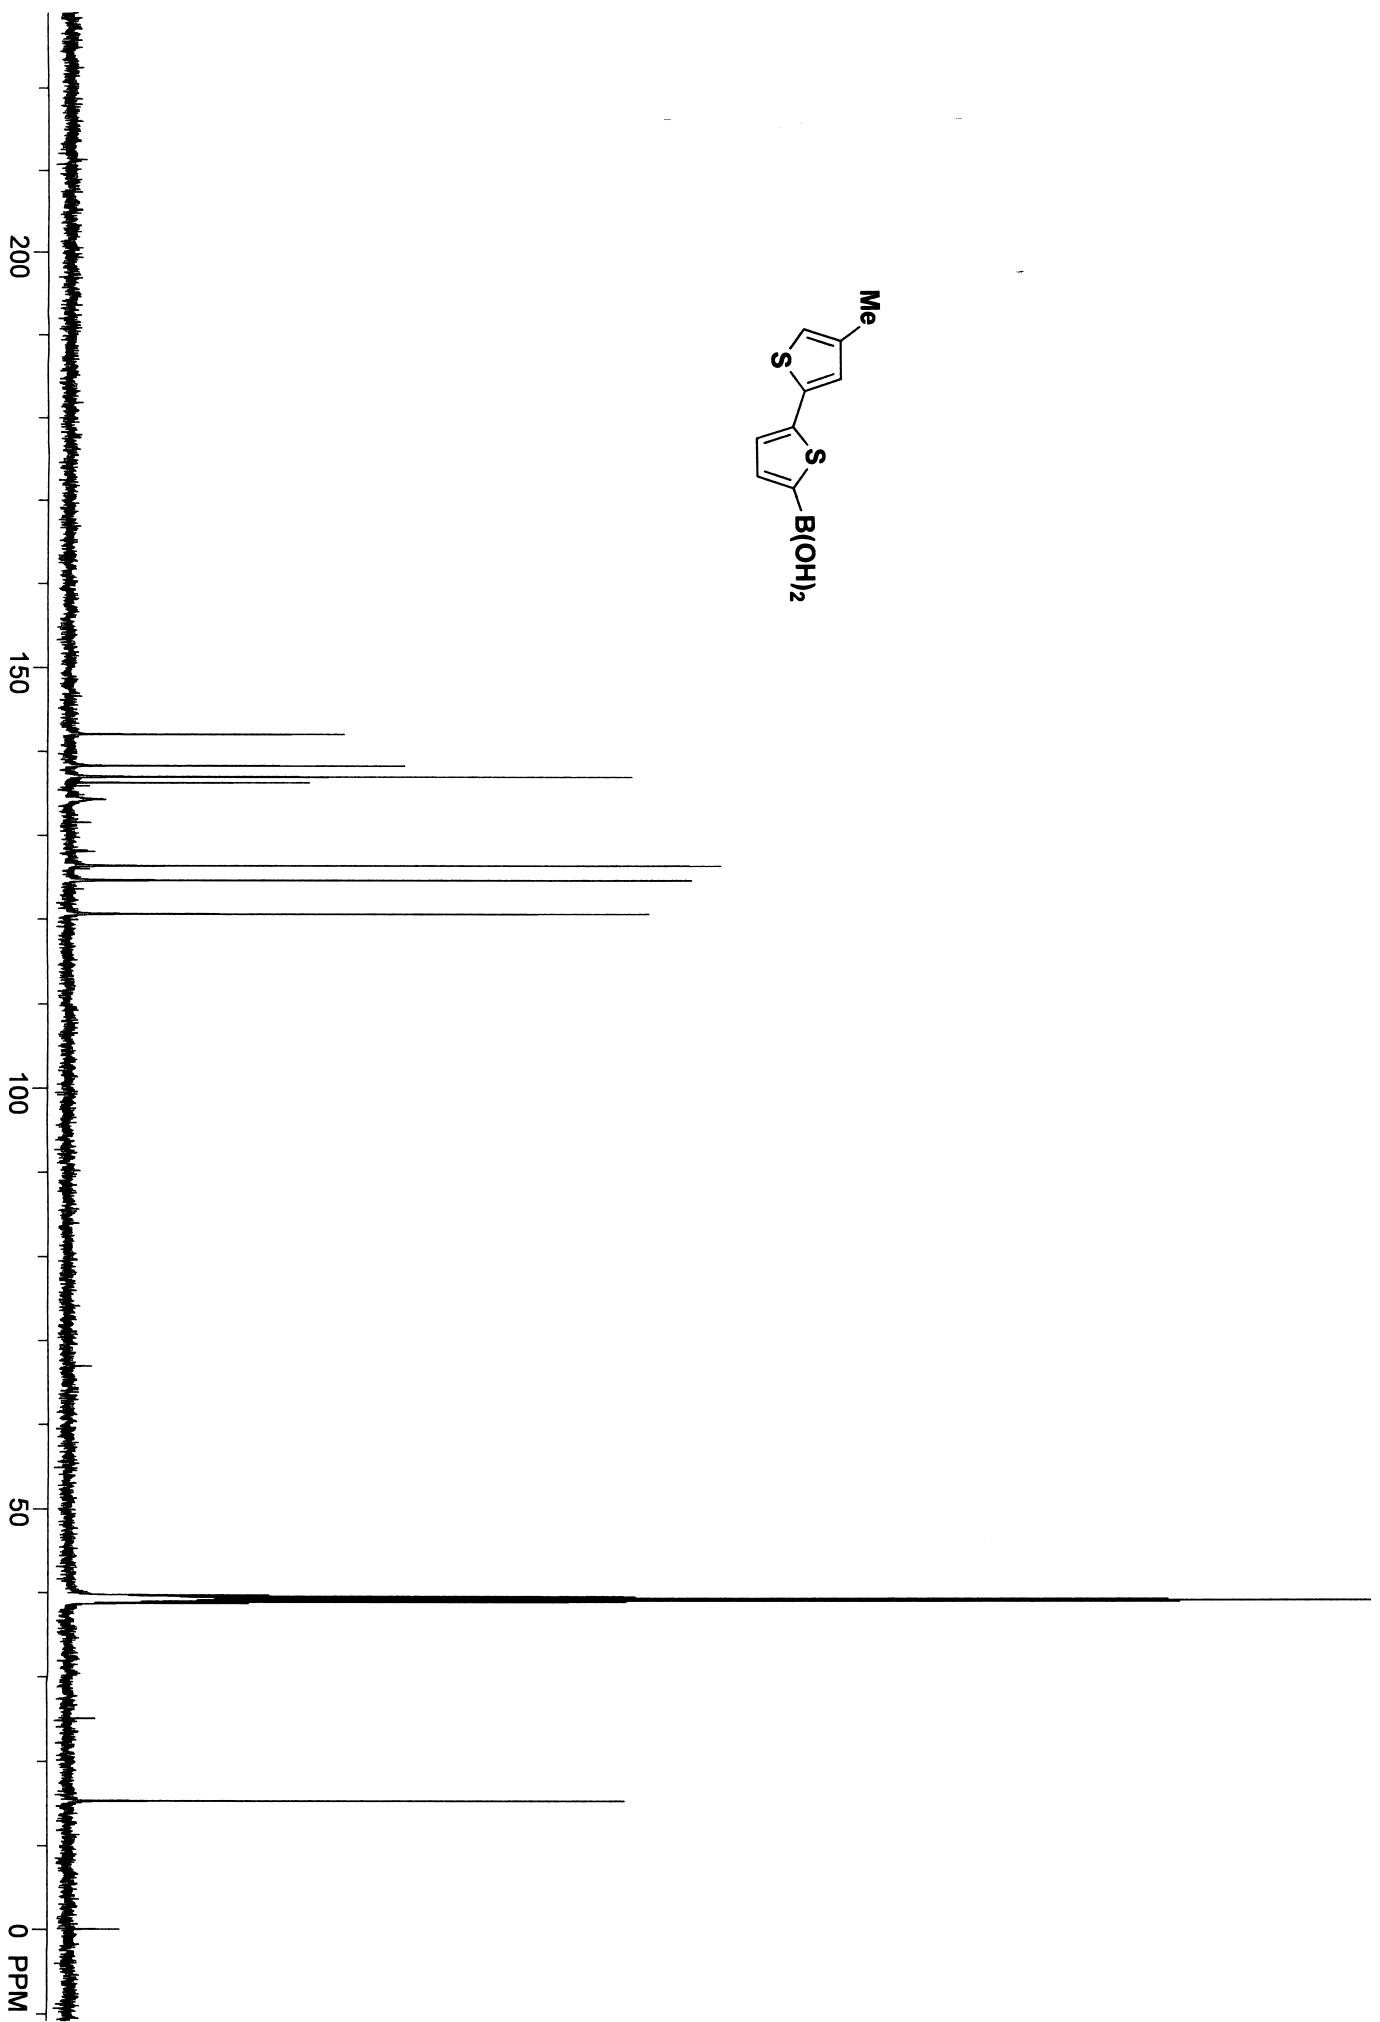



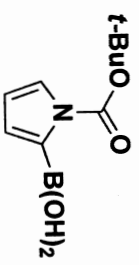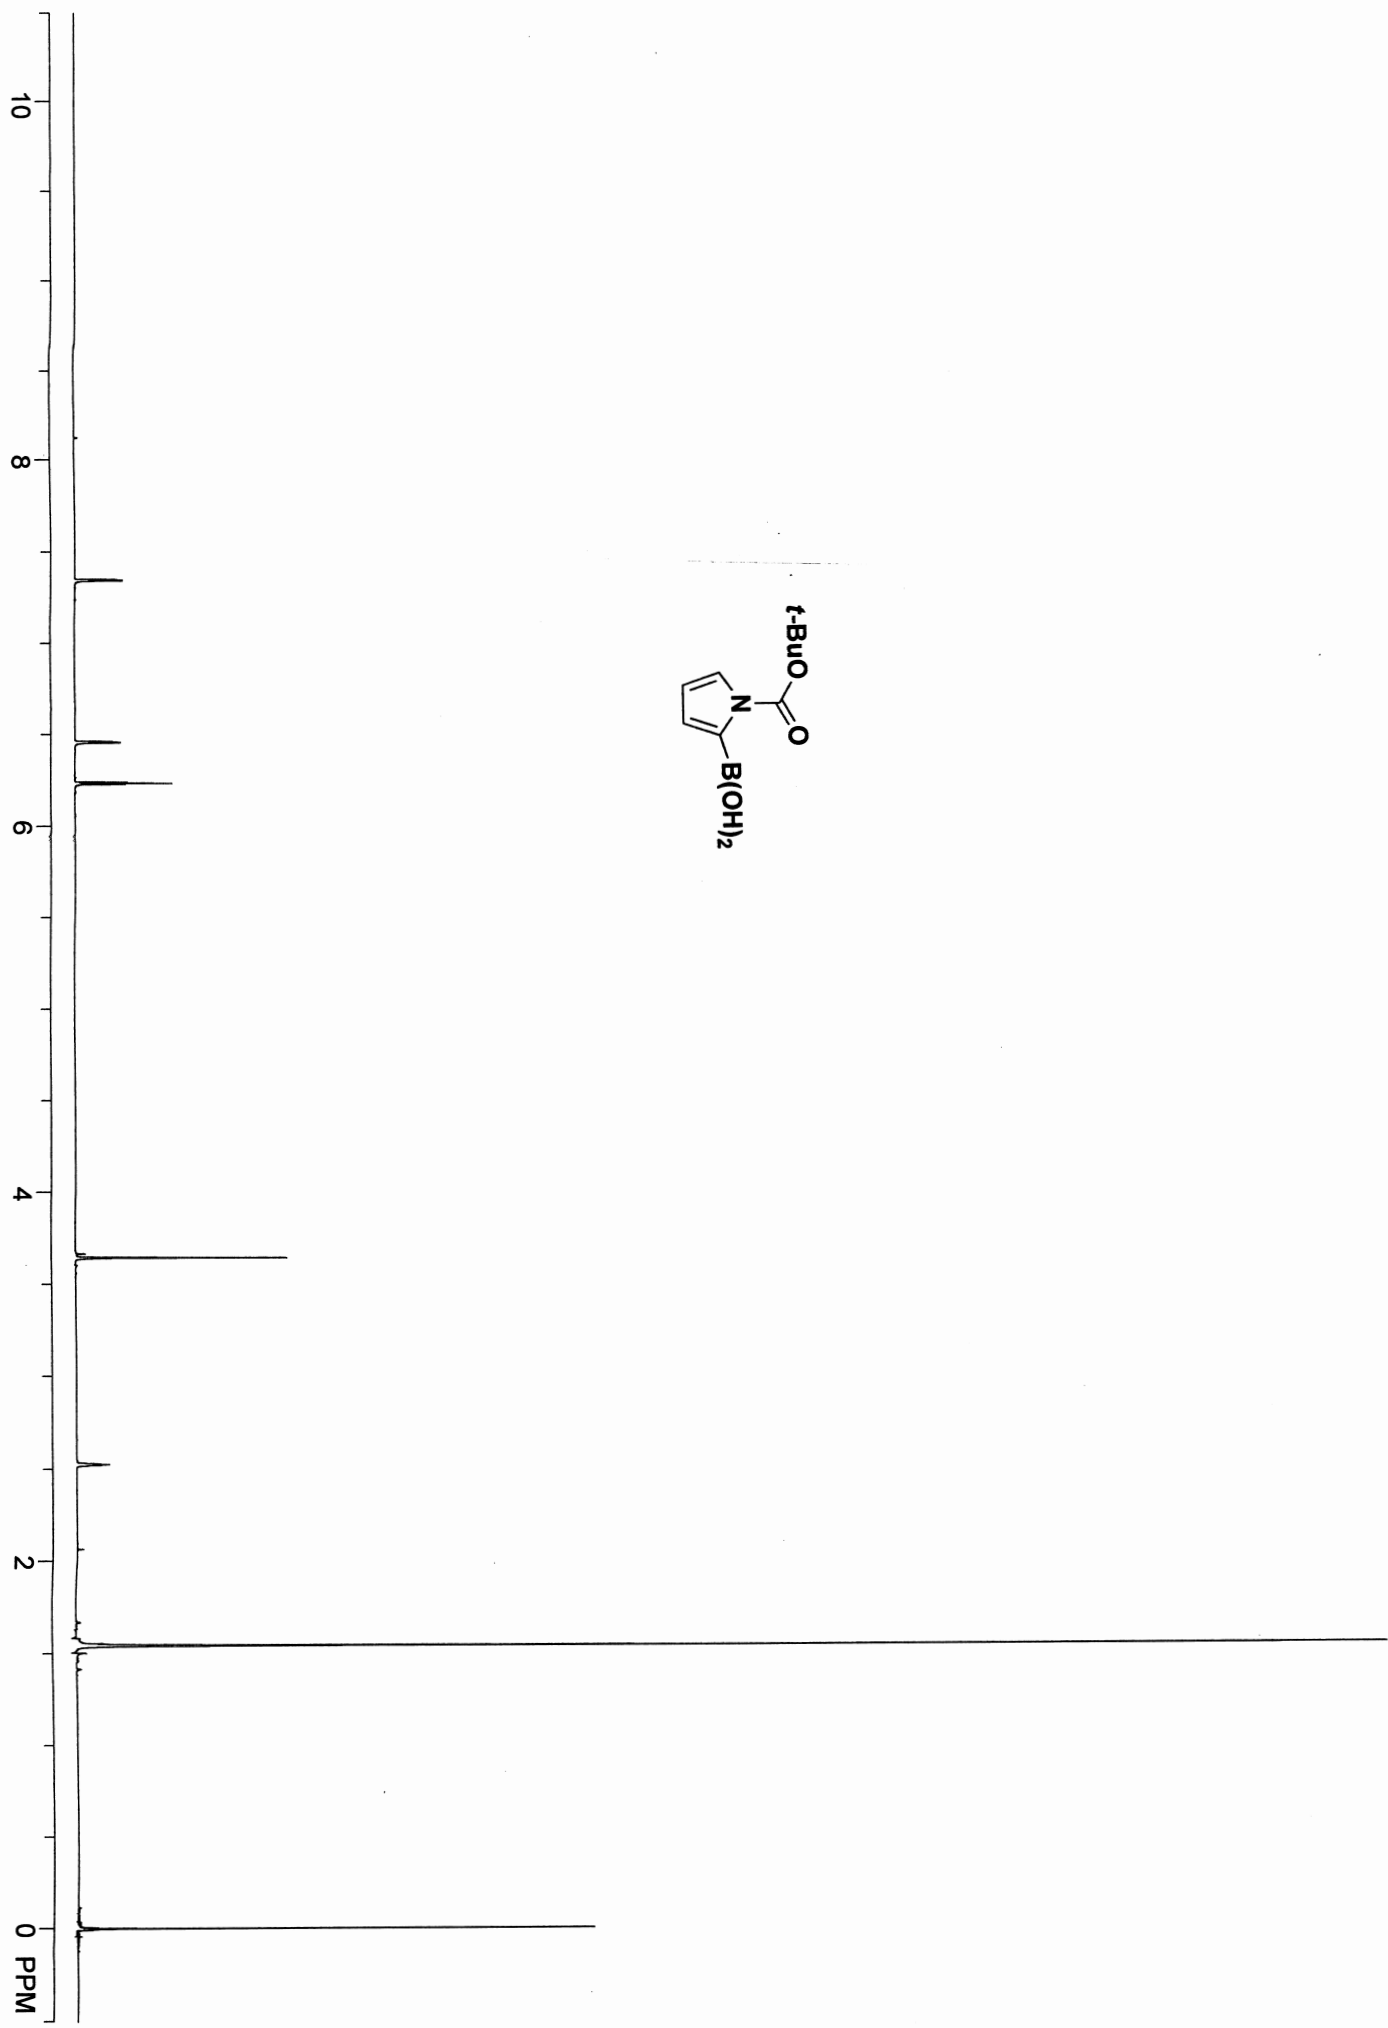

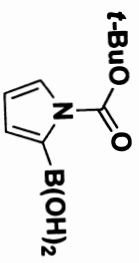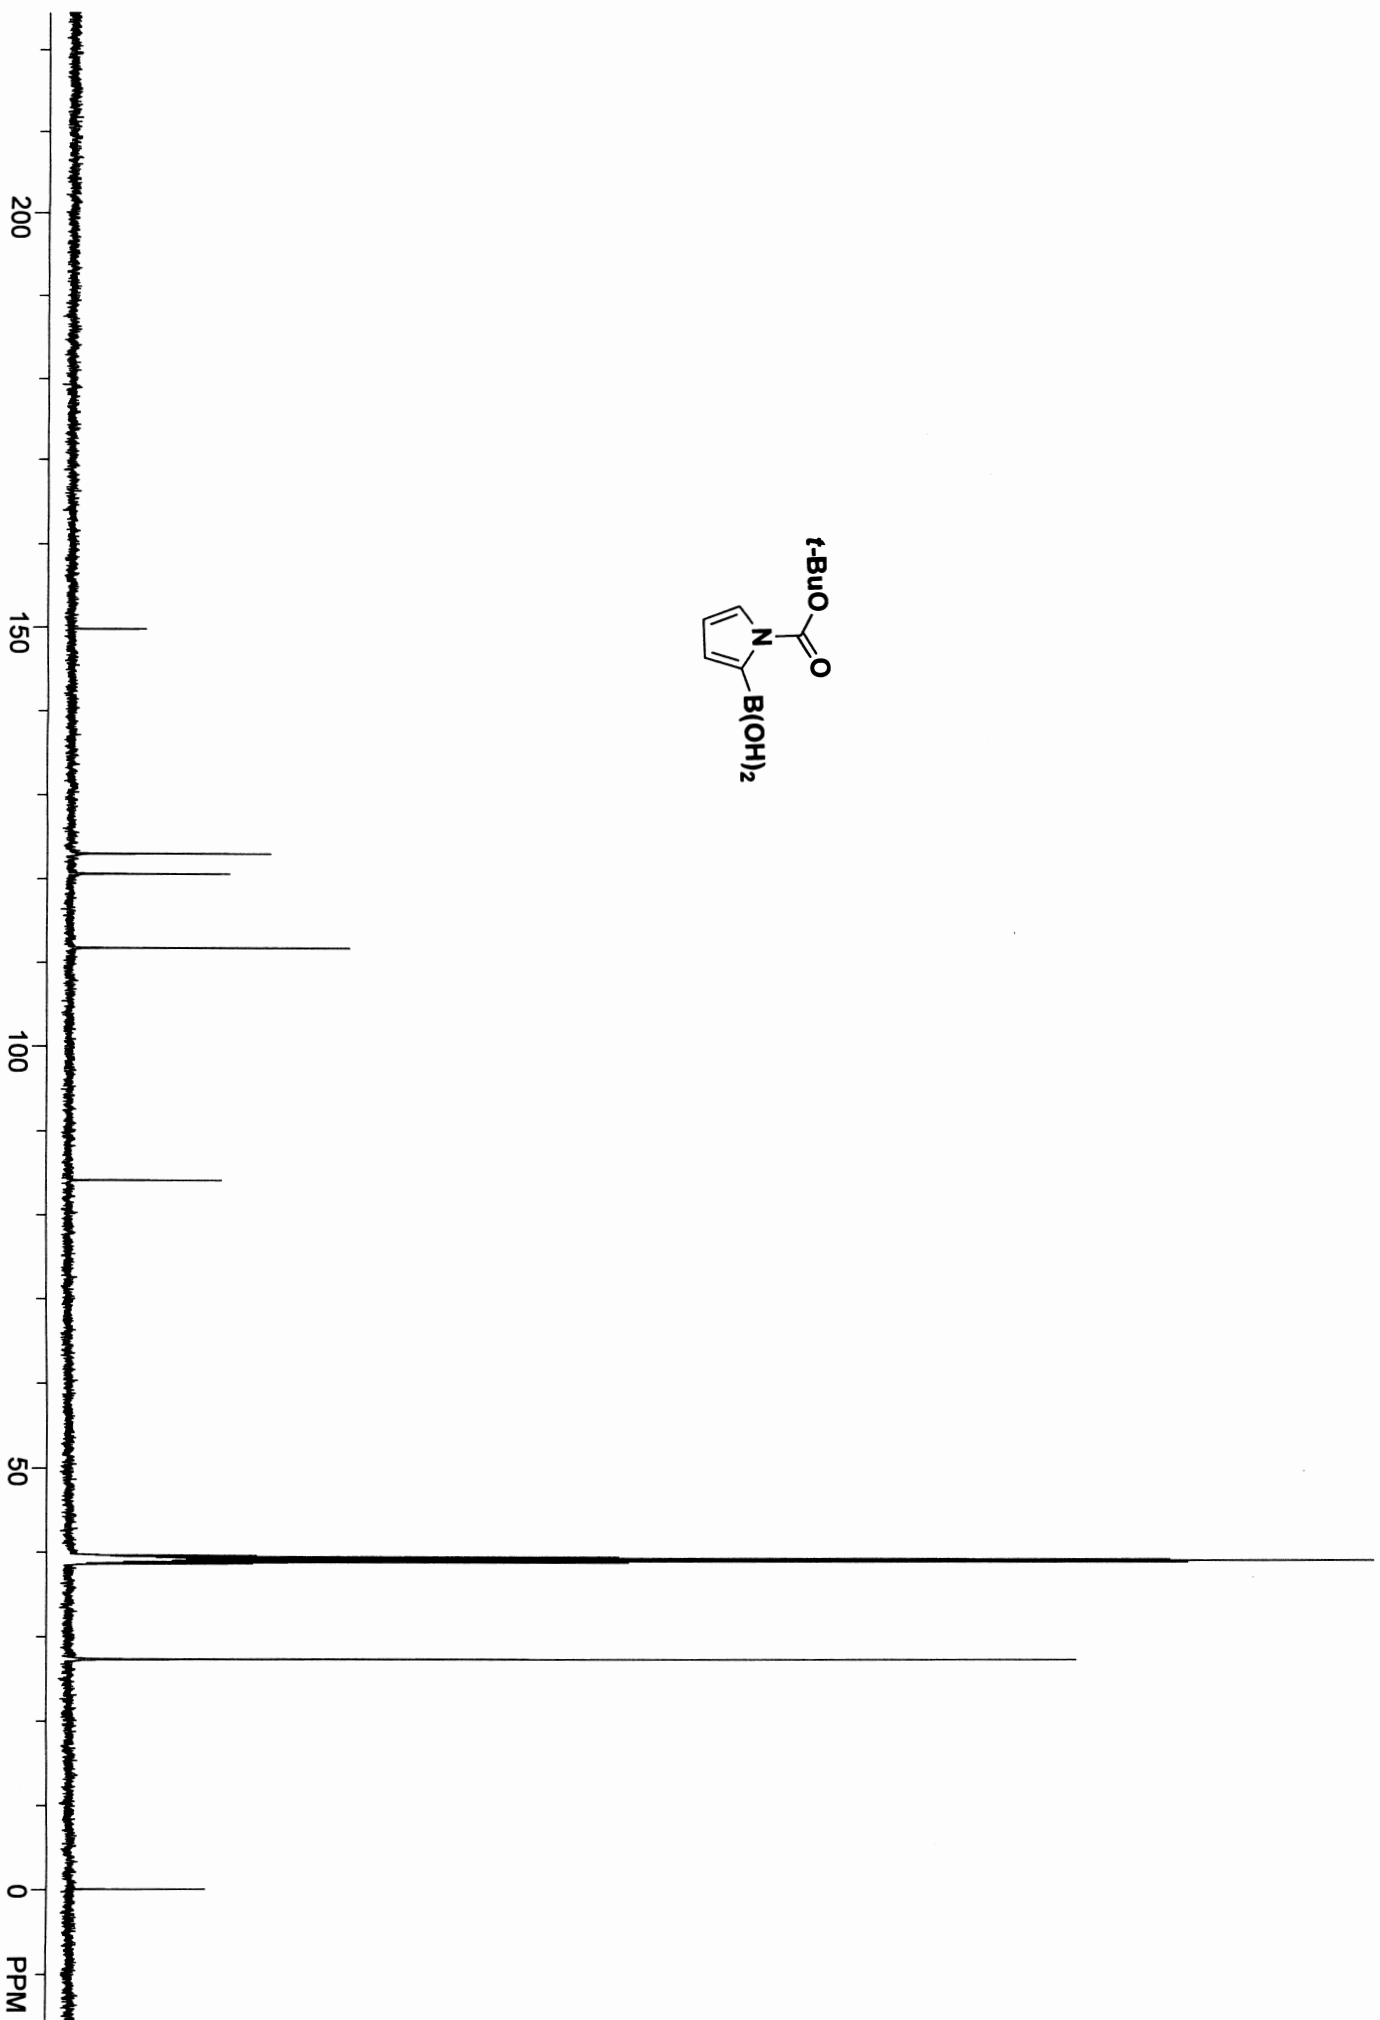

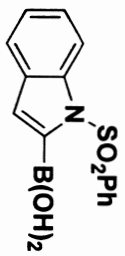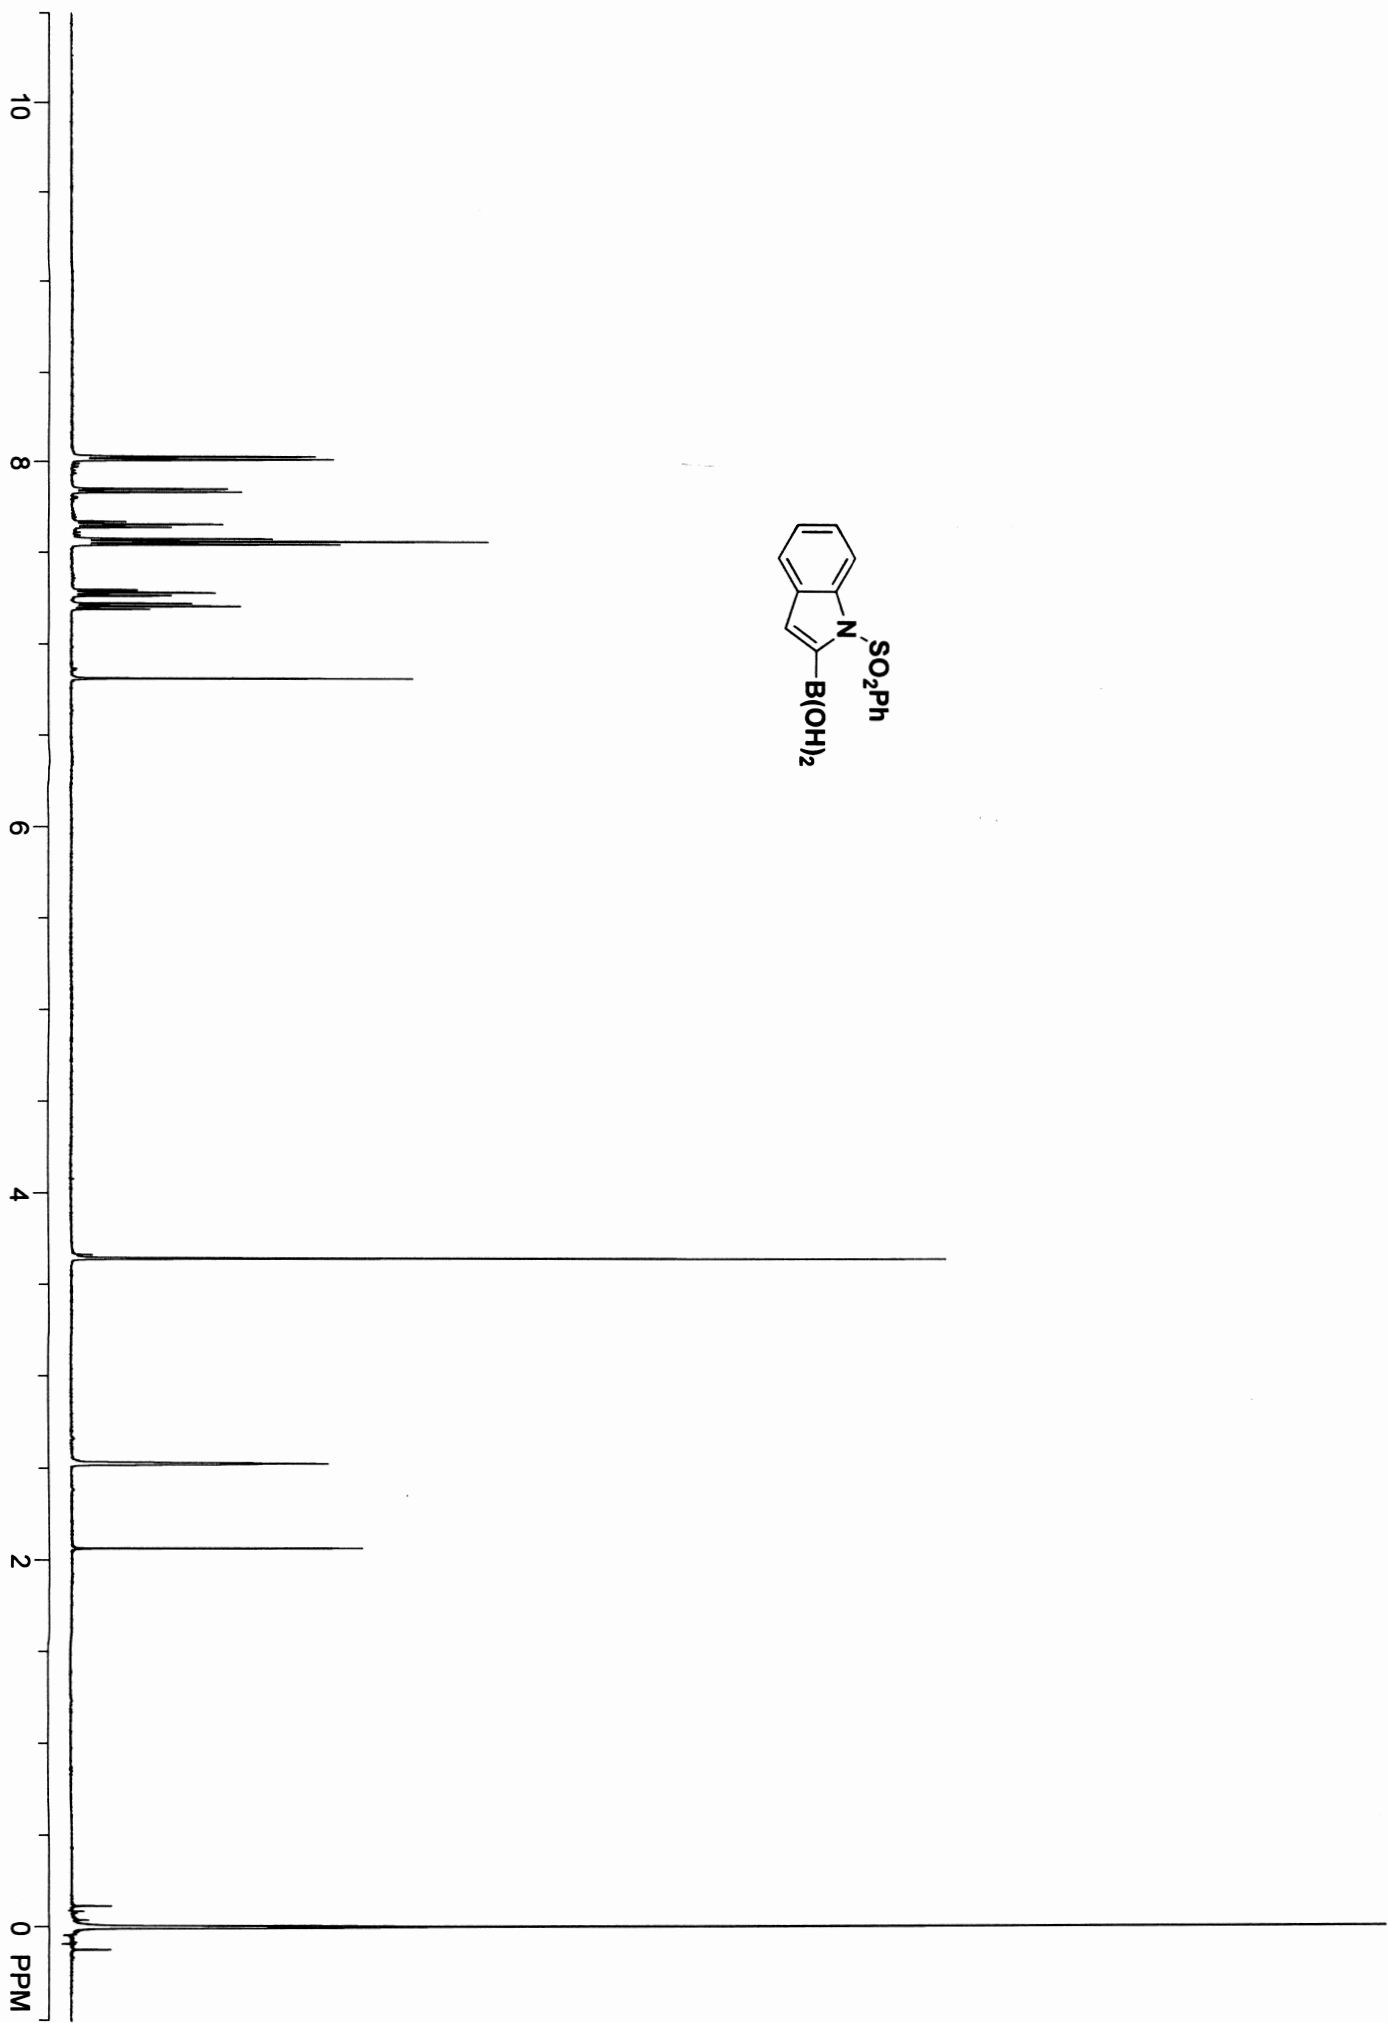

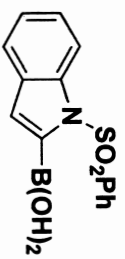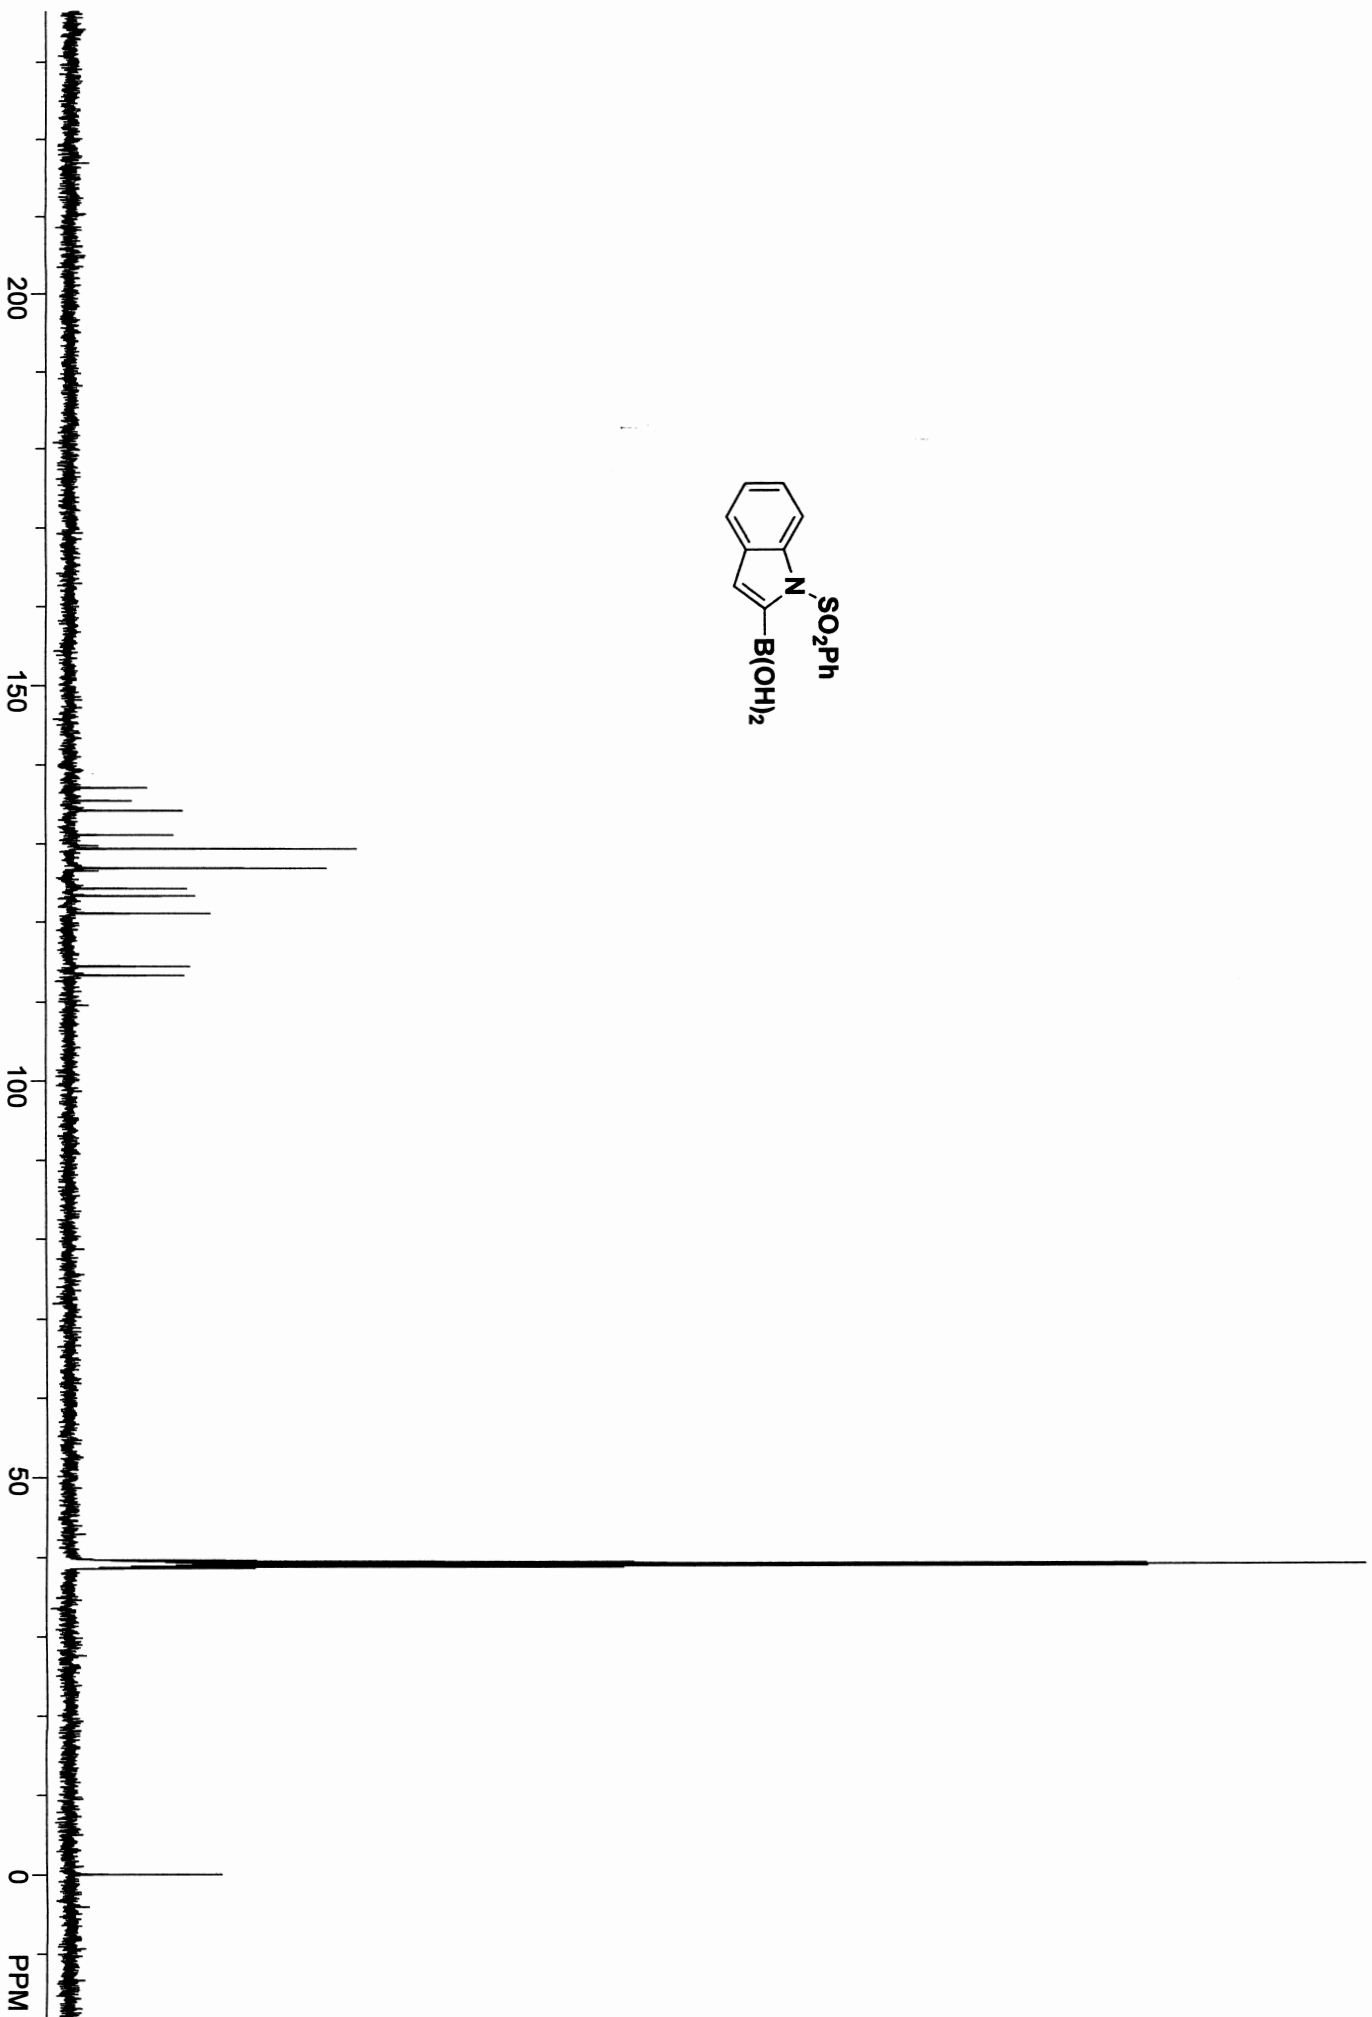

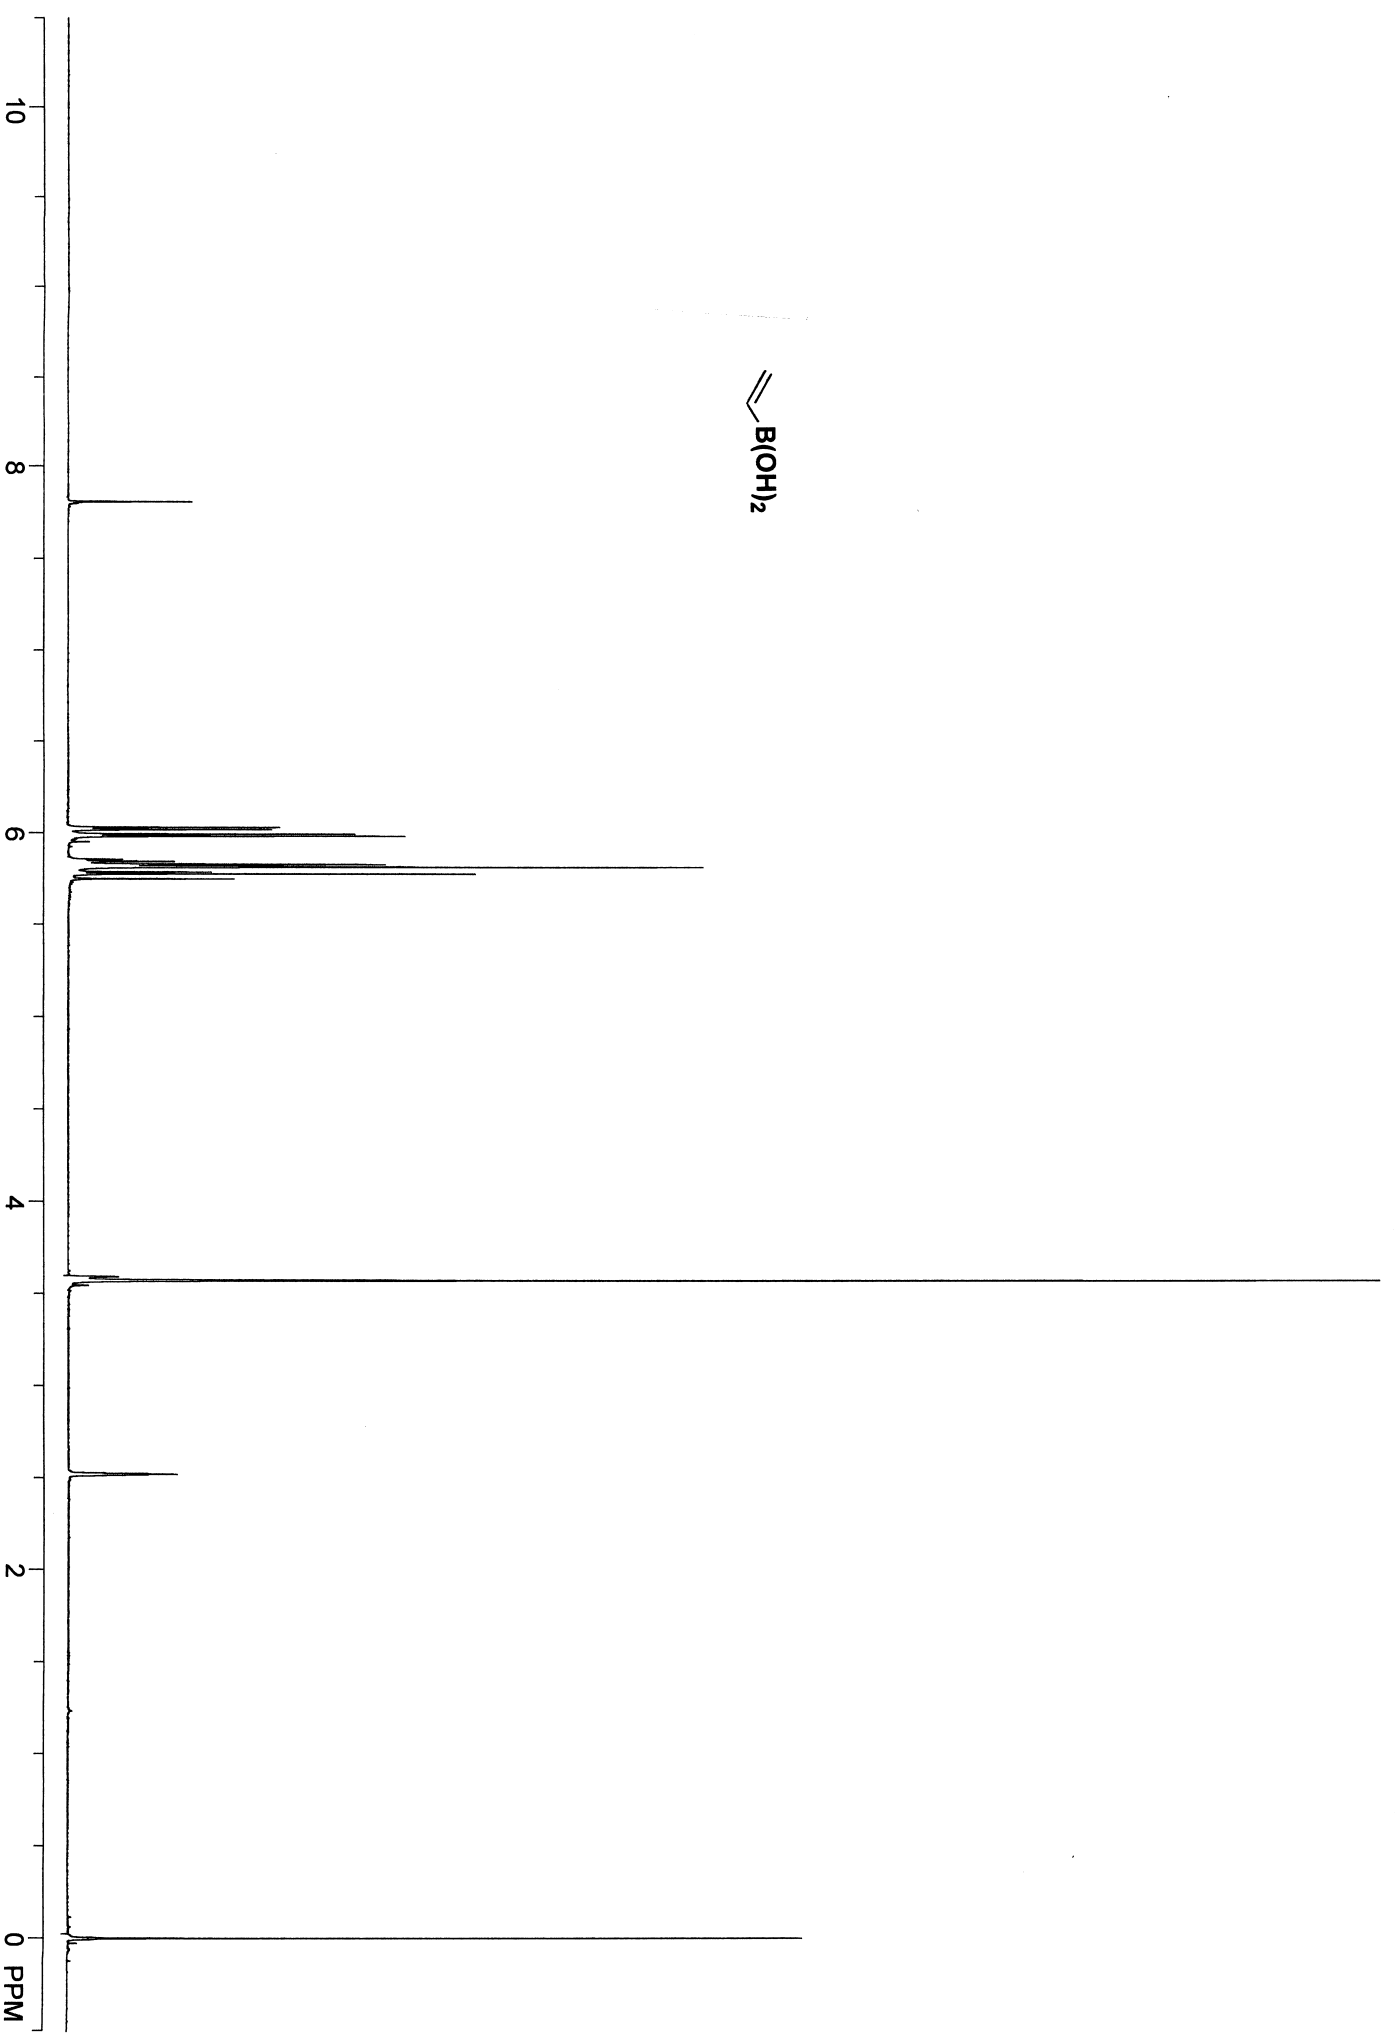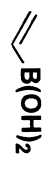

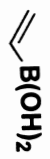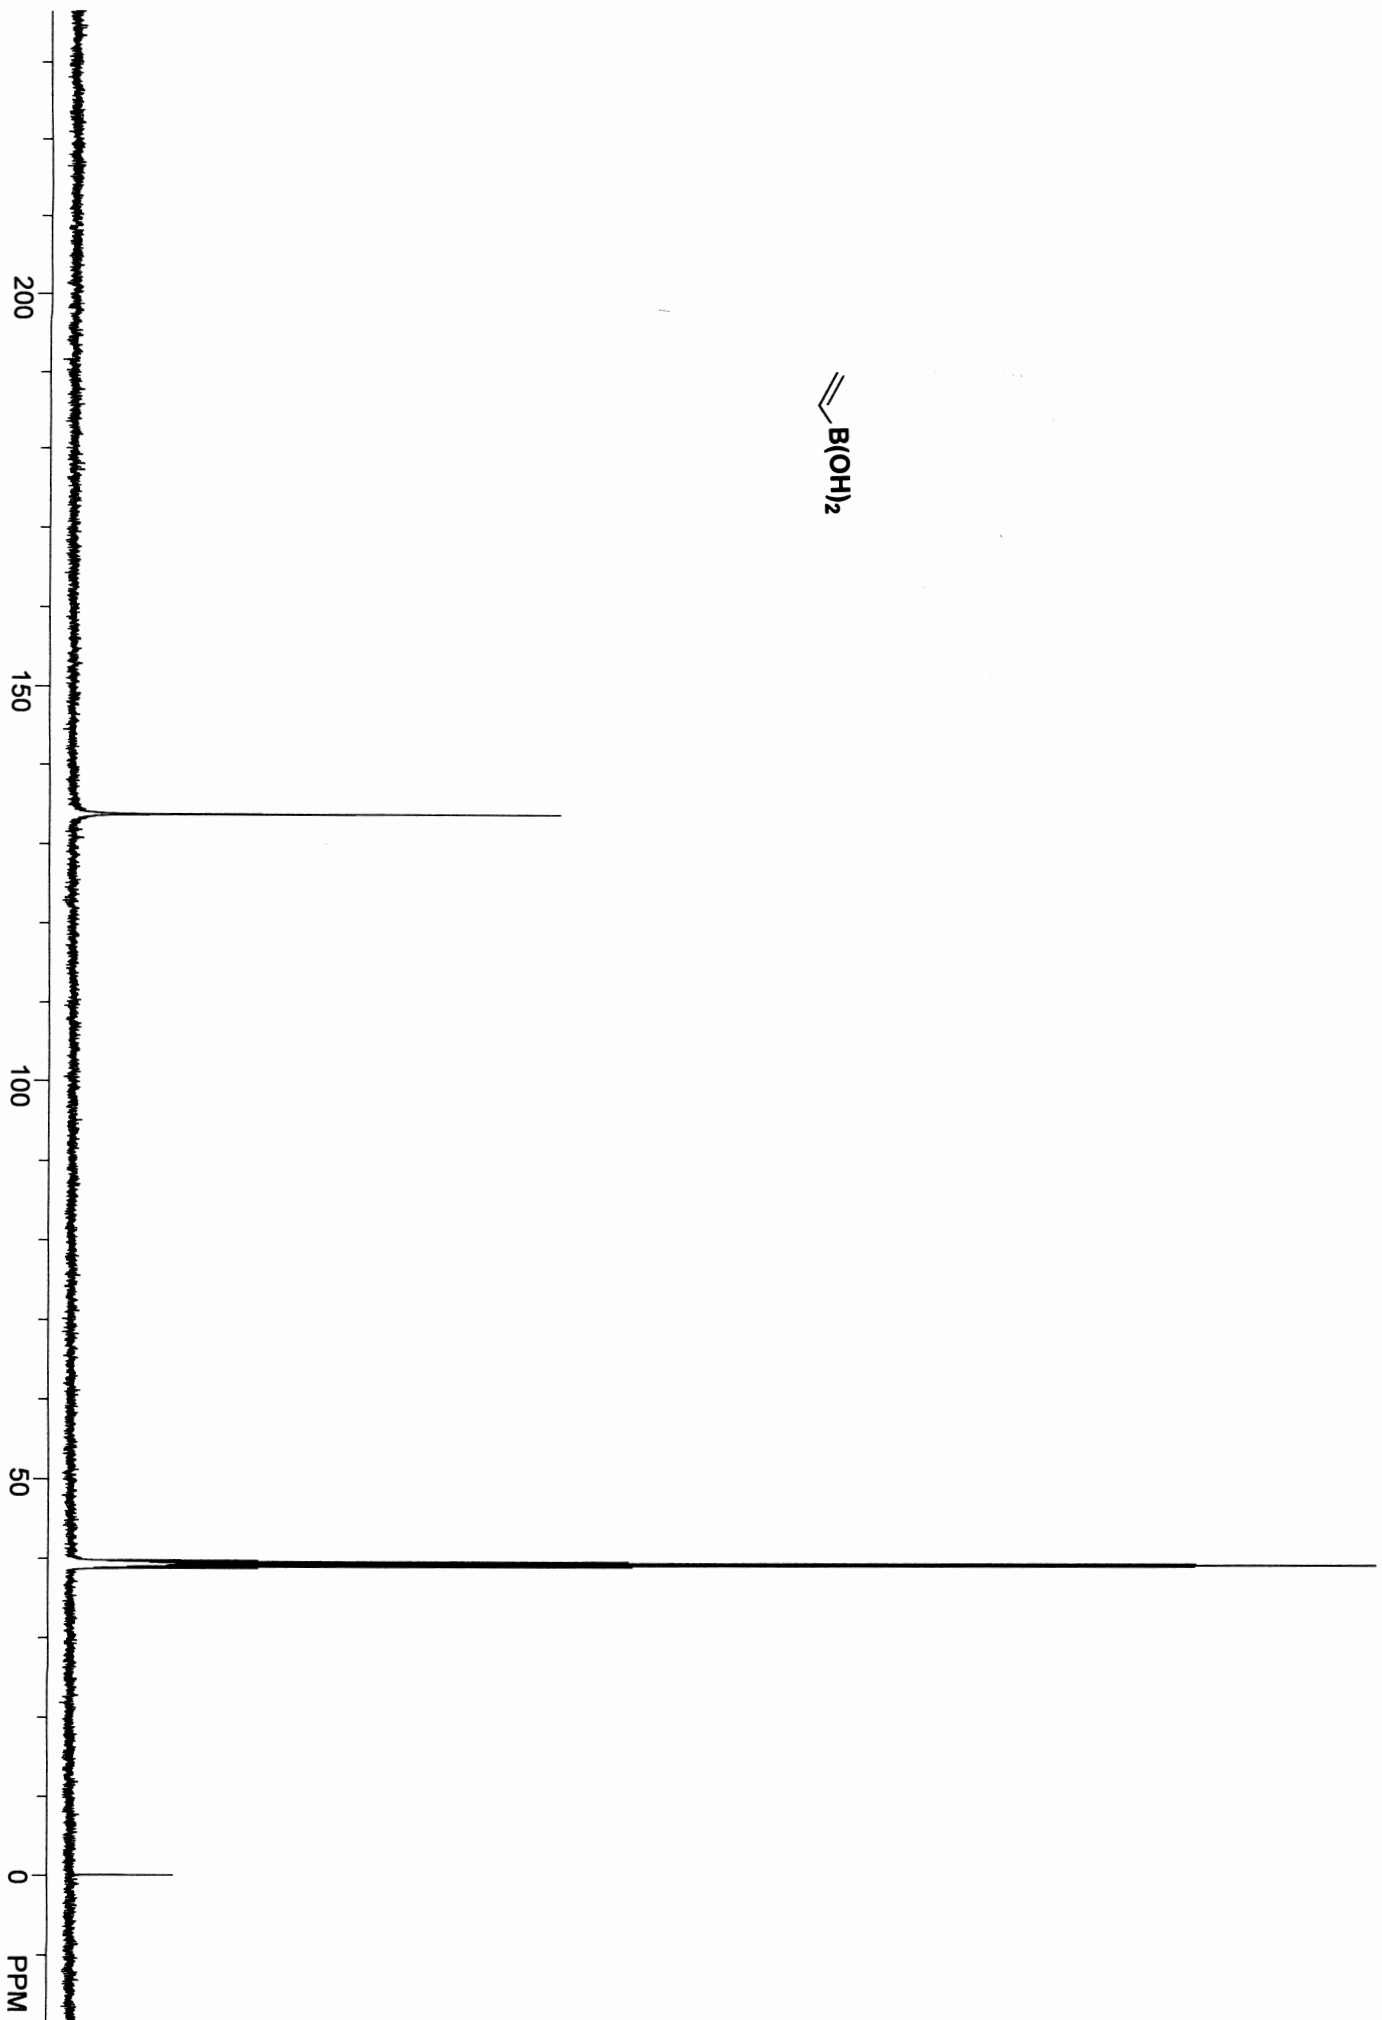

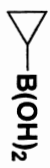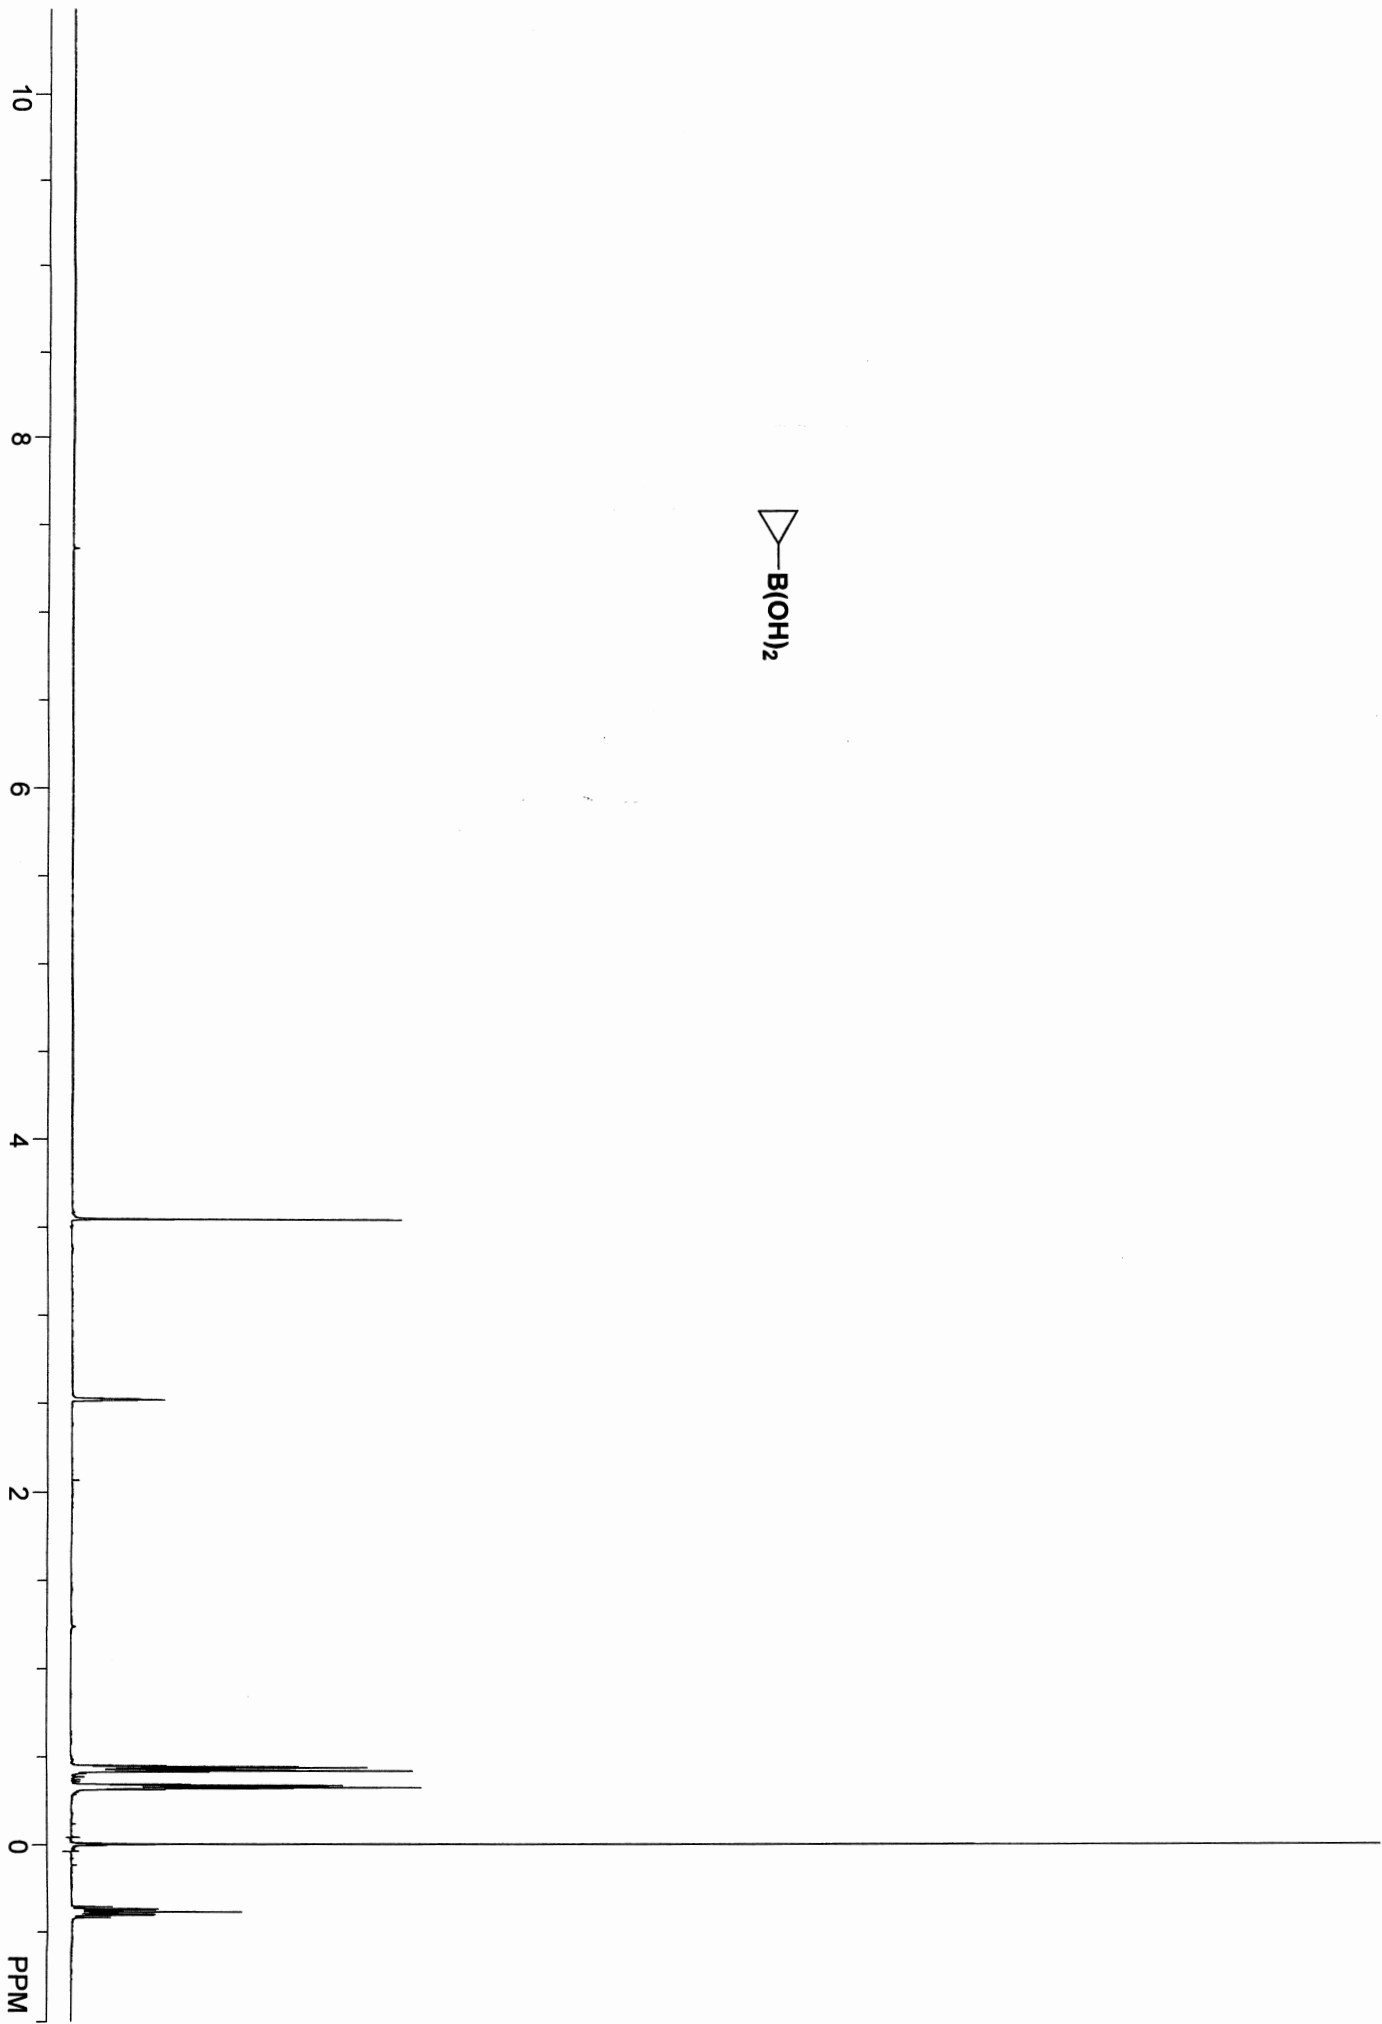

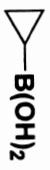

200

150

100

50

0

PPM

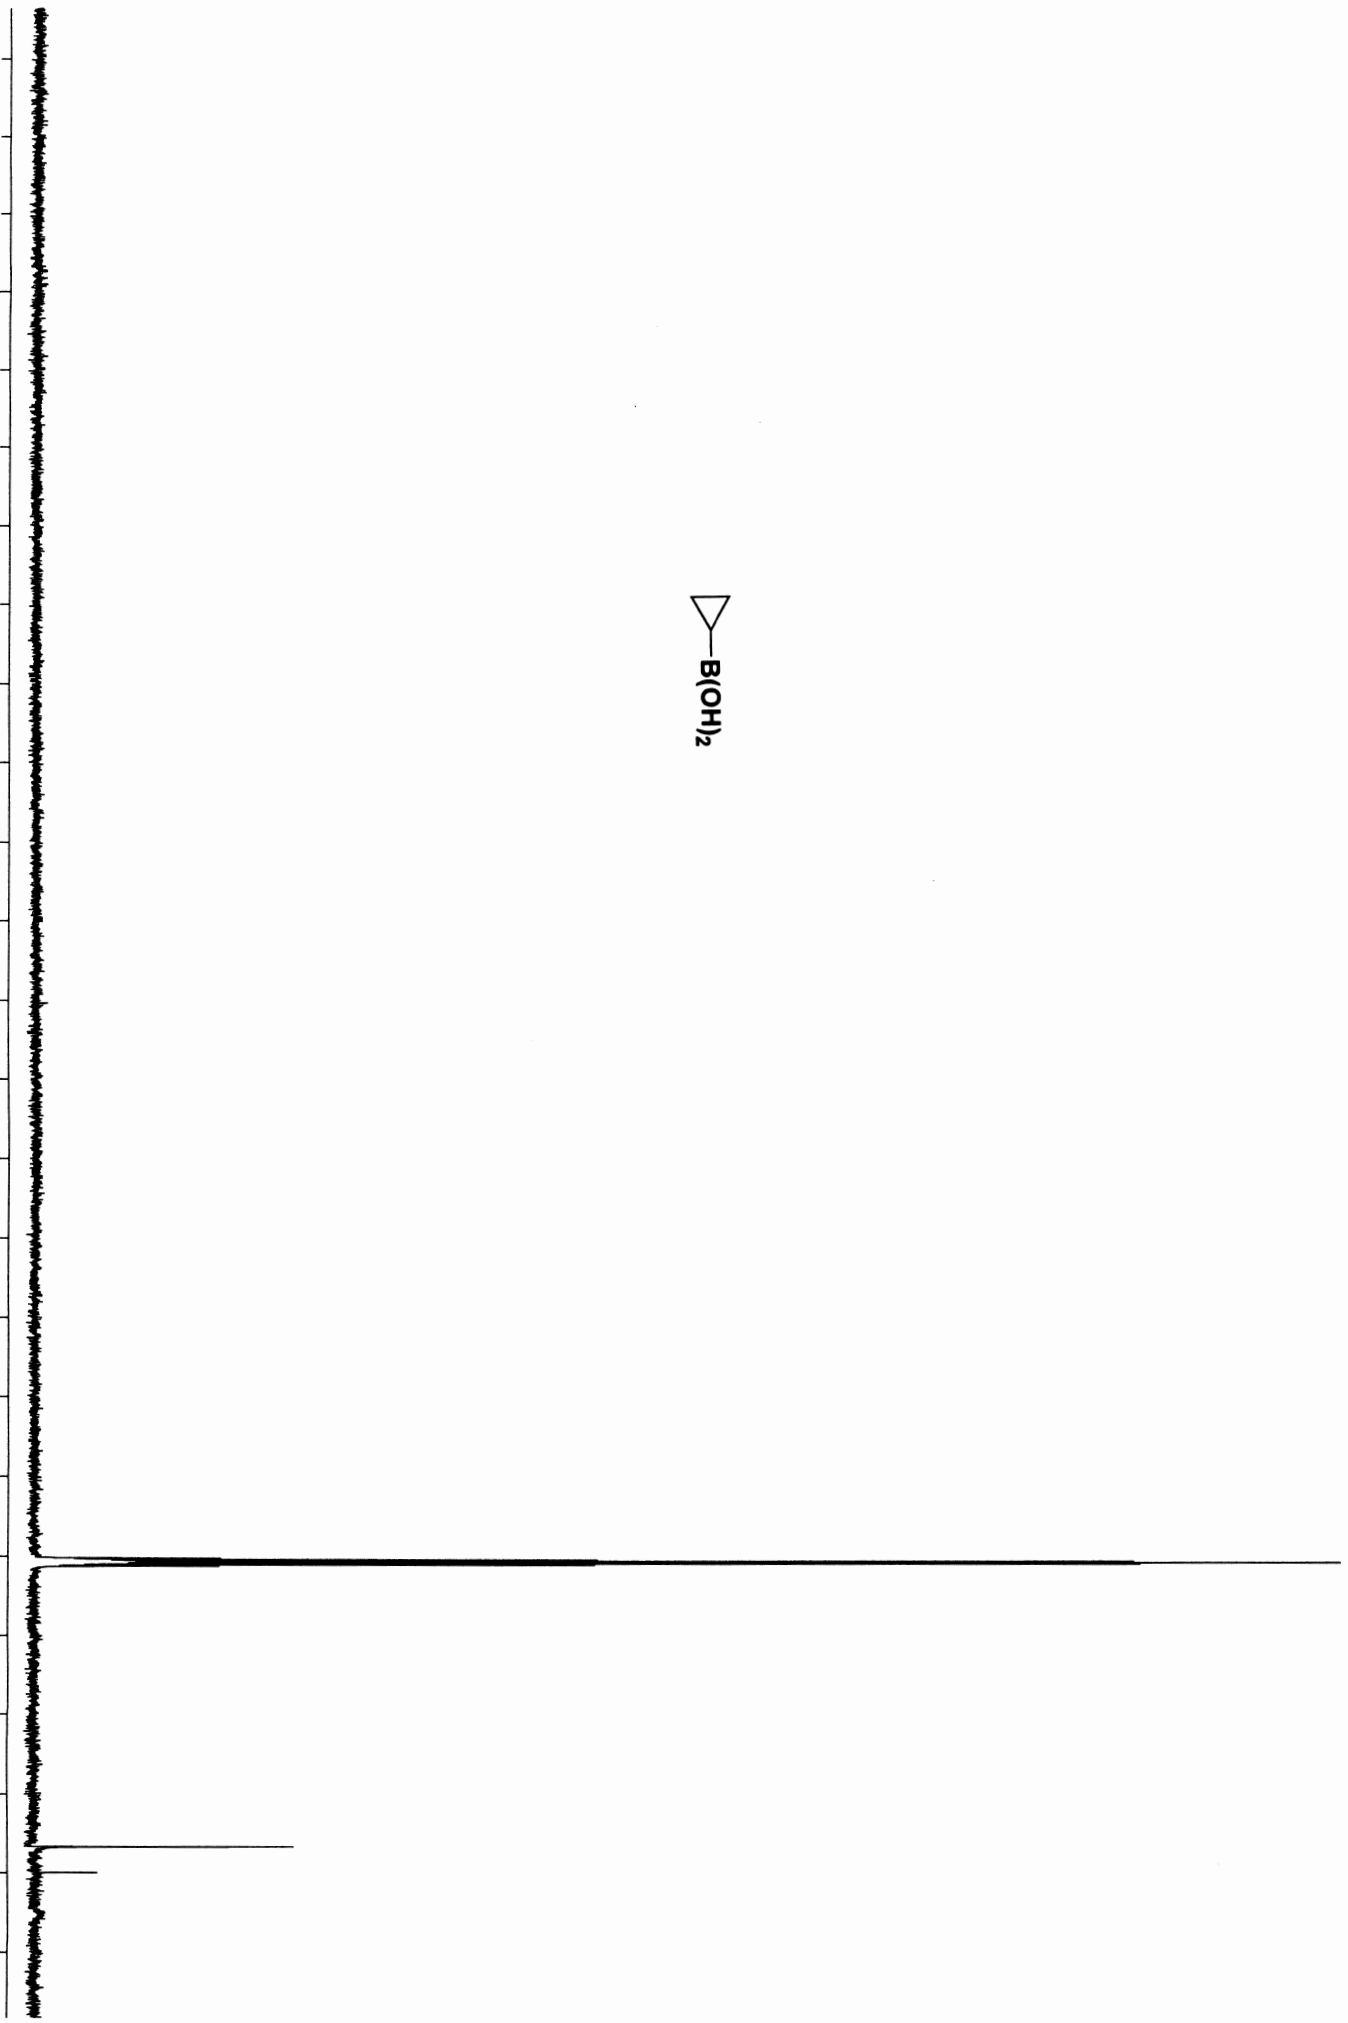



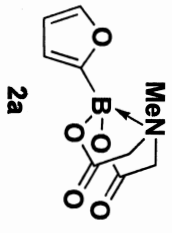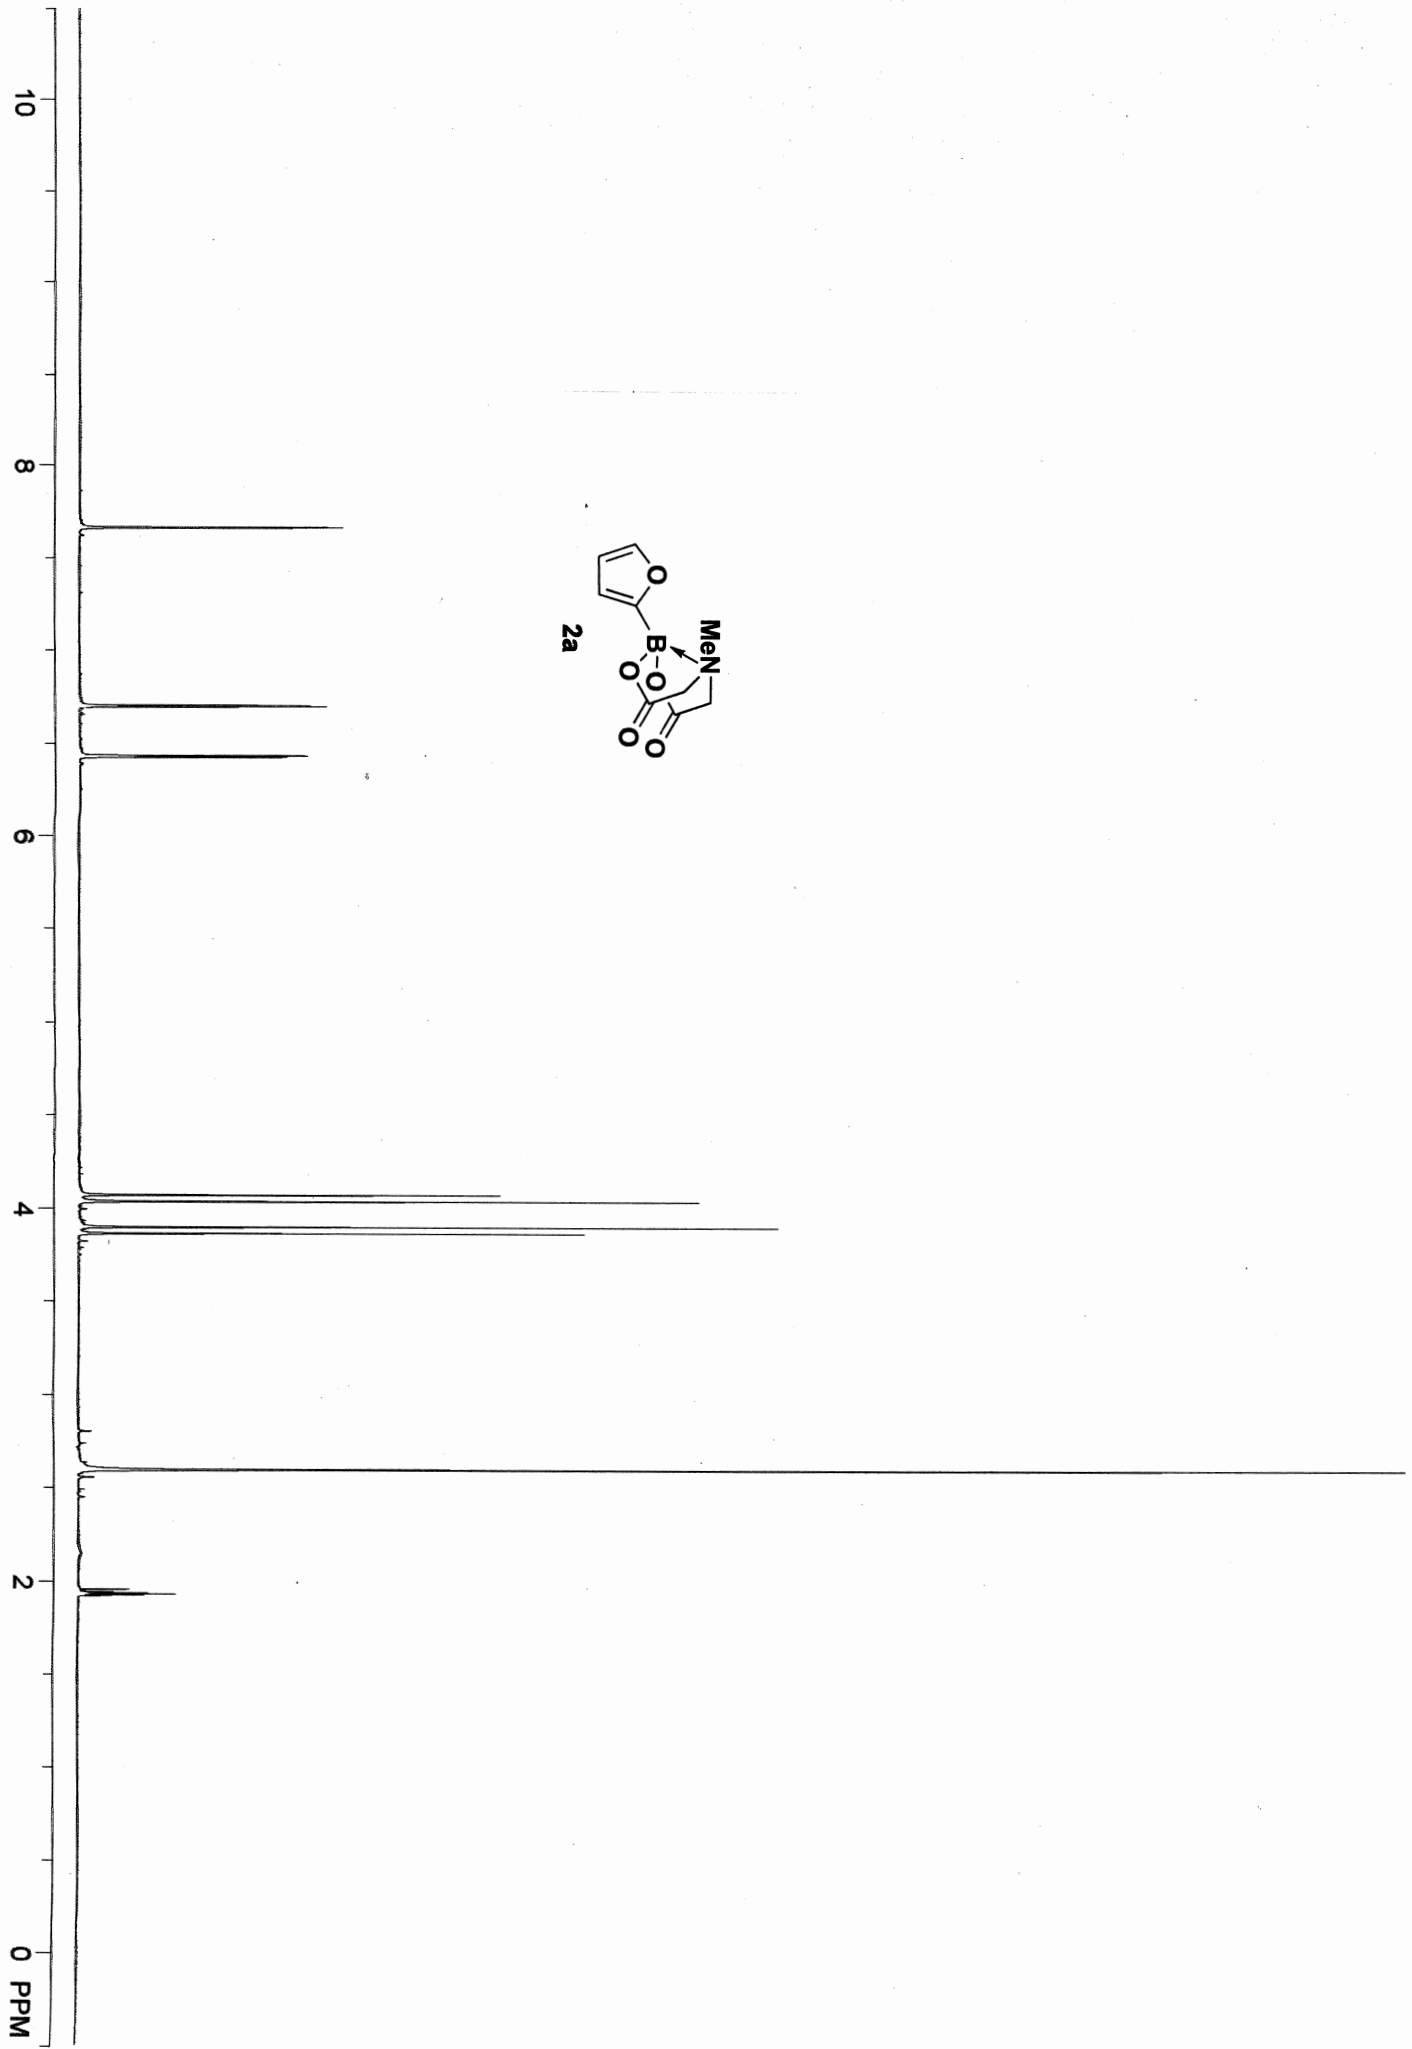

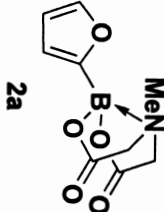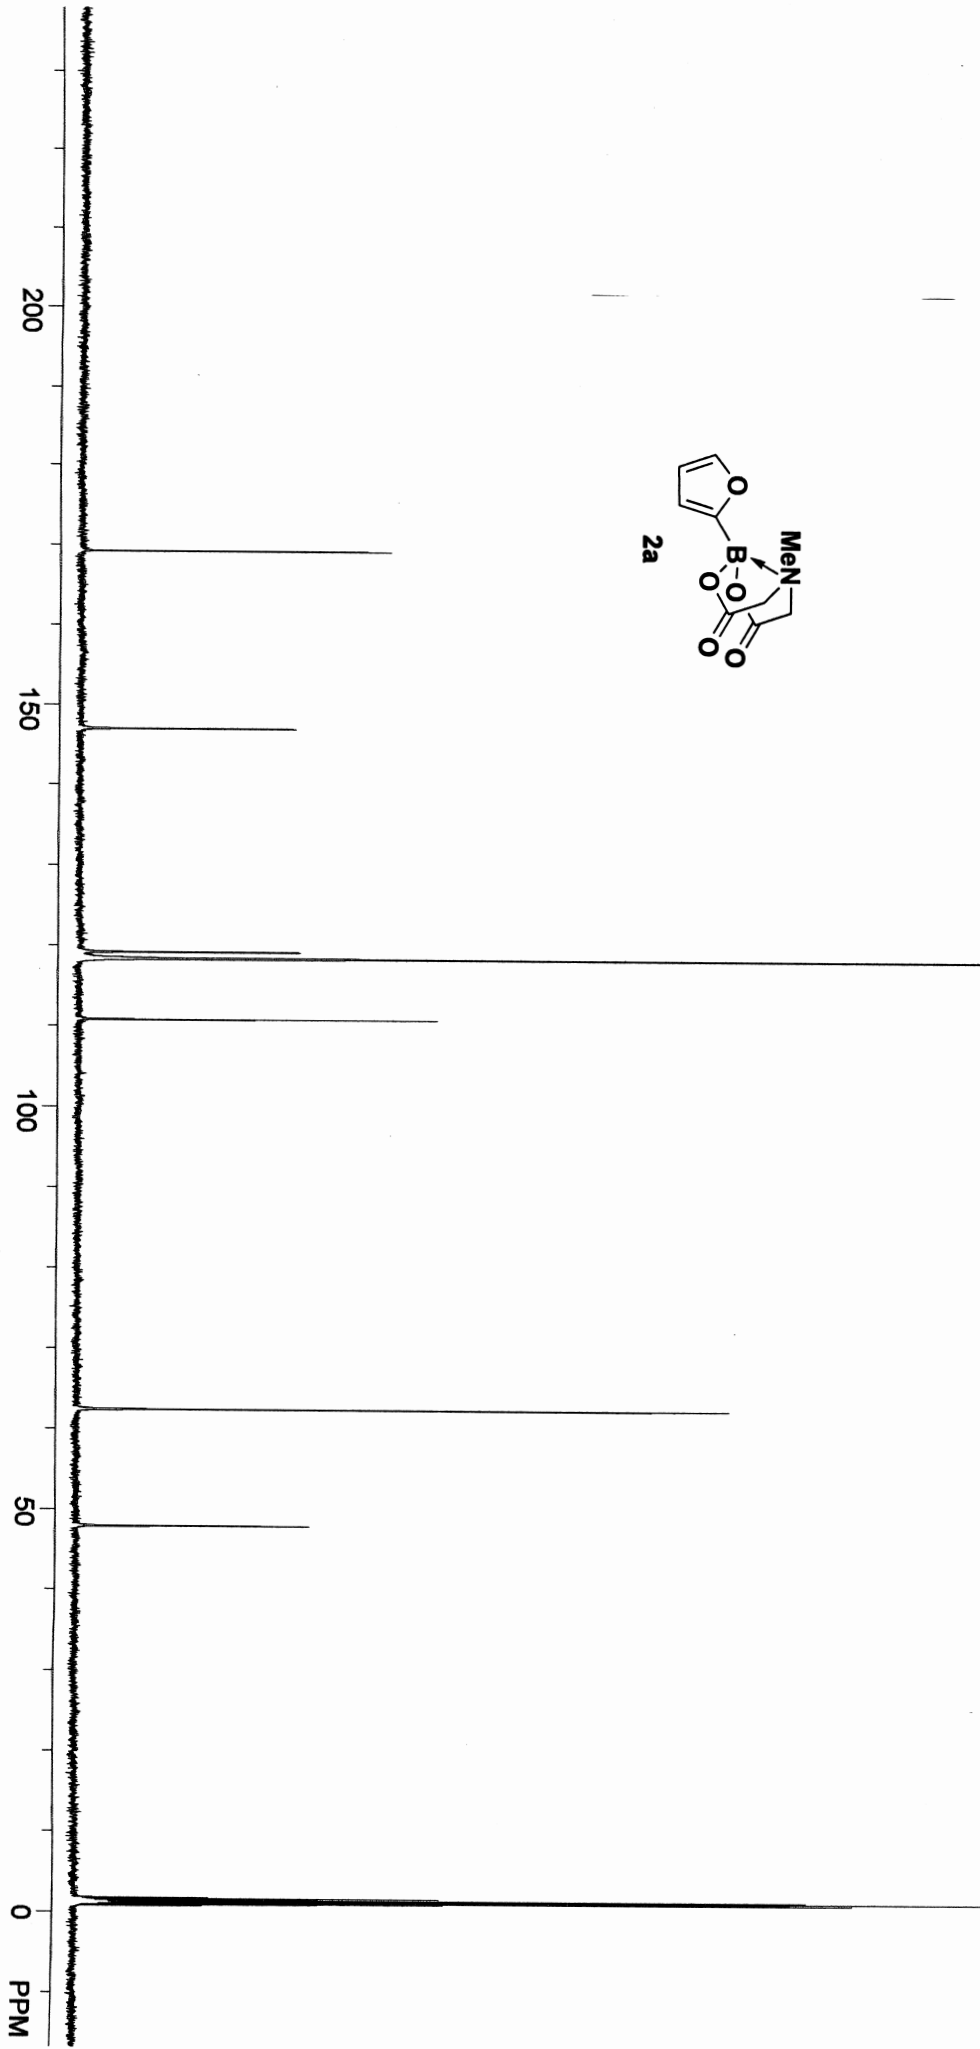

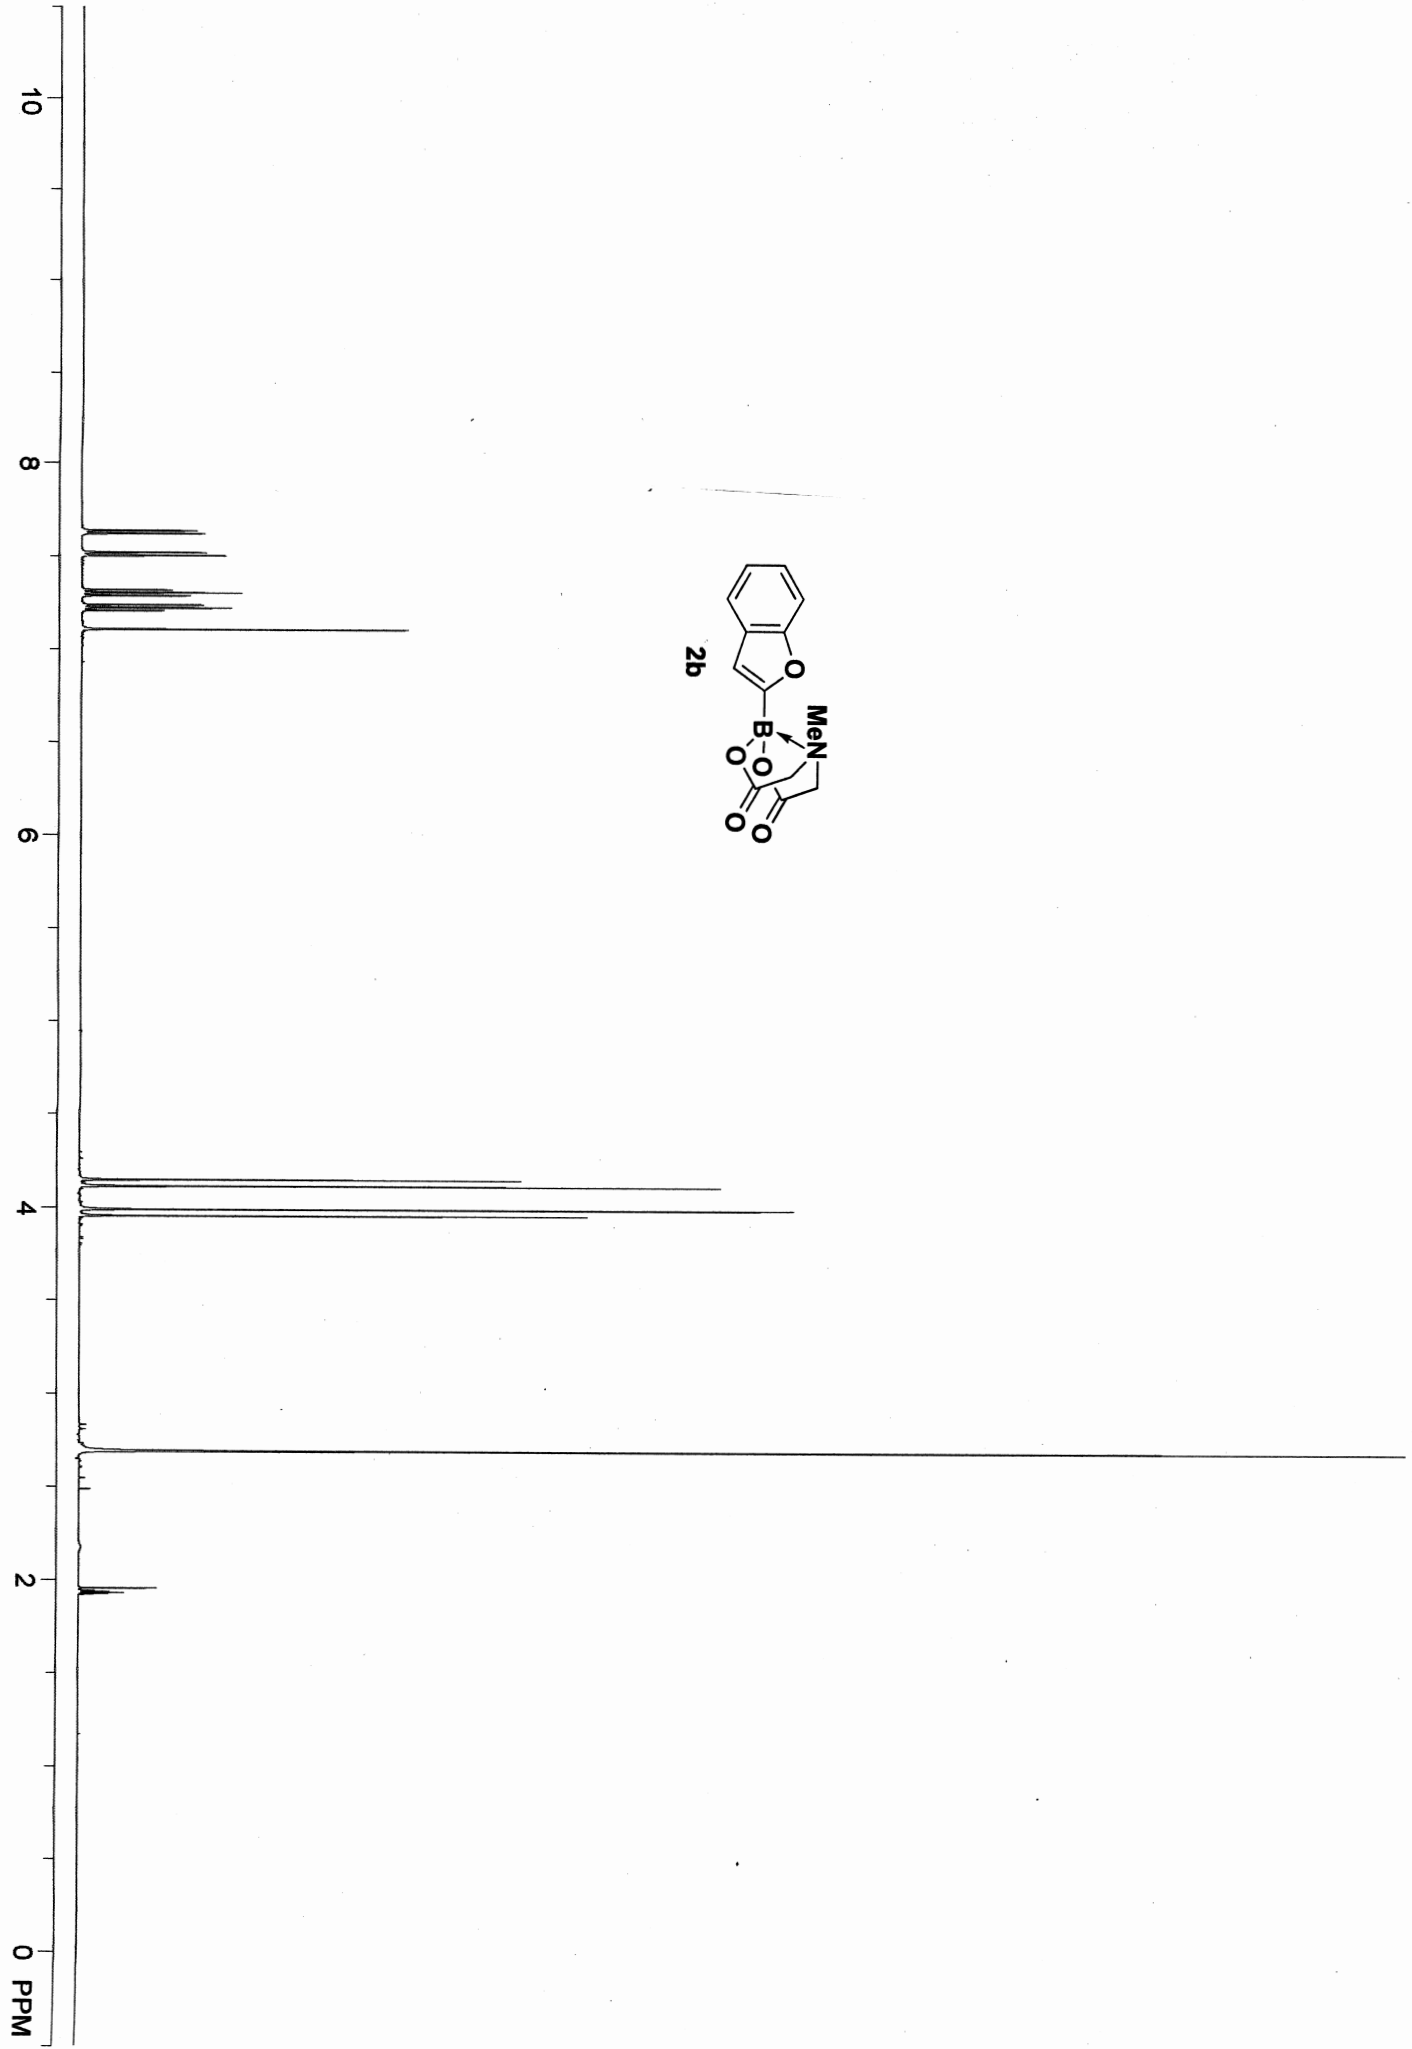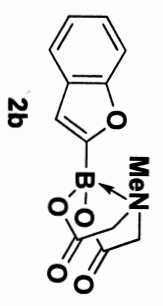

200  
150  
100  
50  
0 PPM

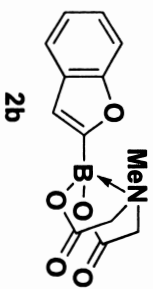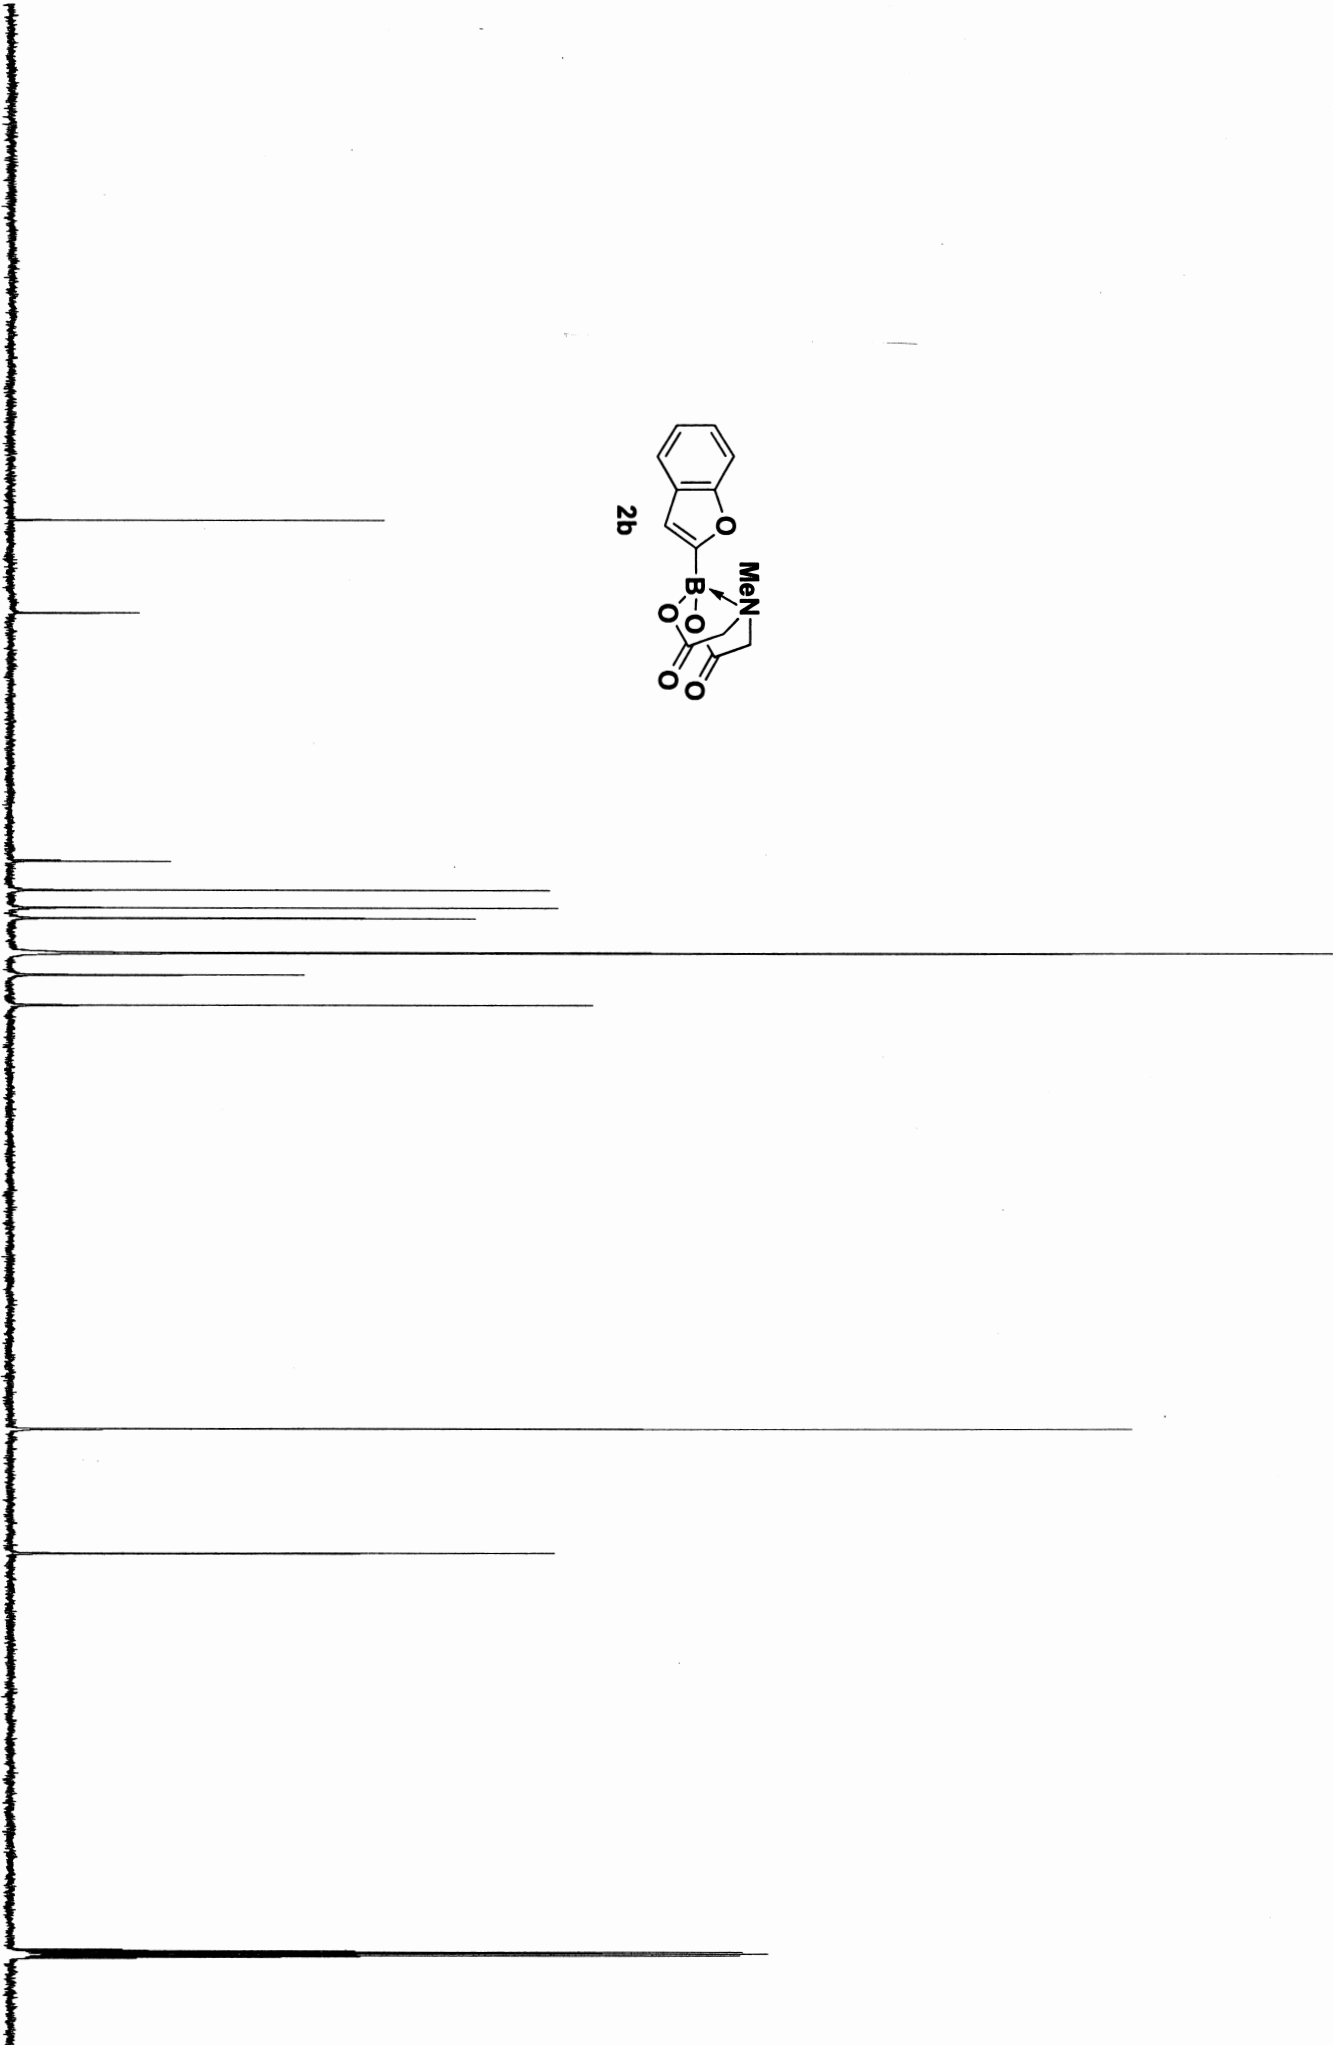

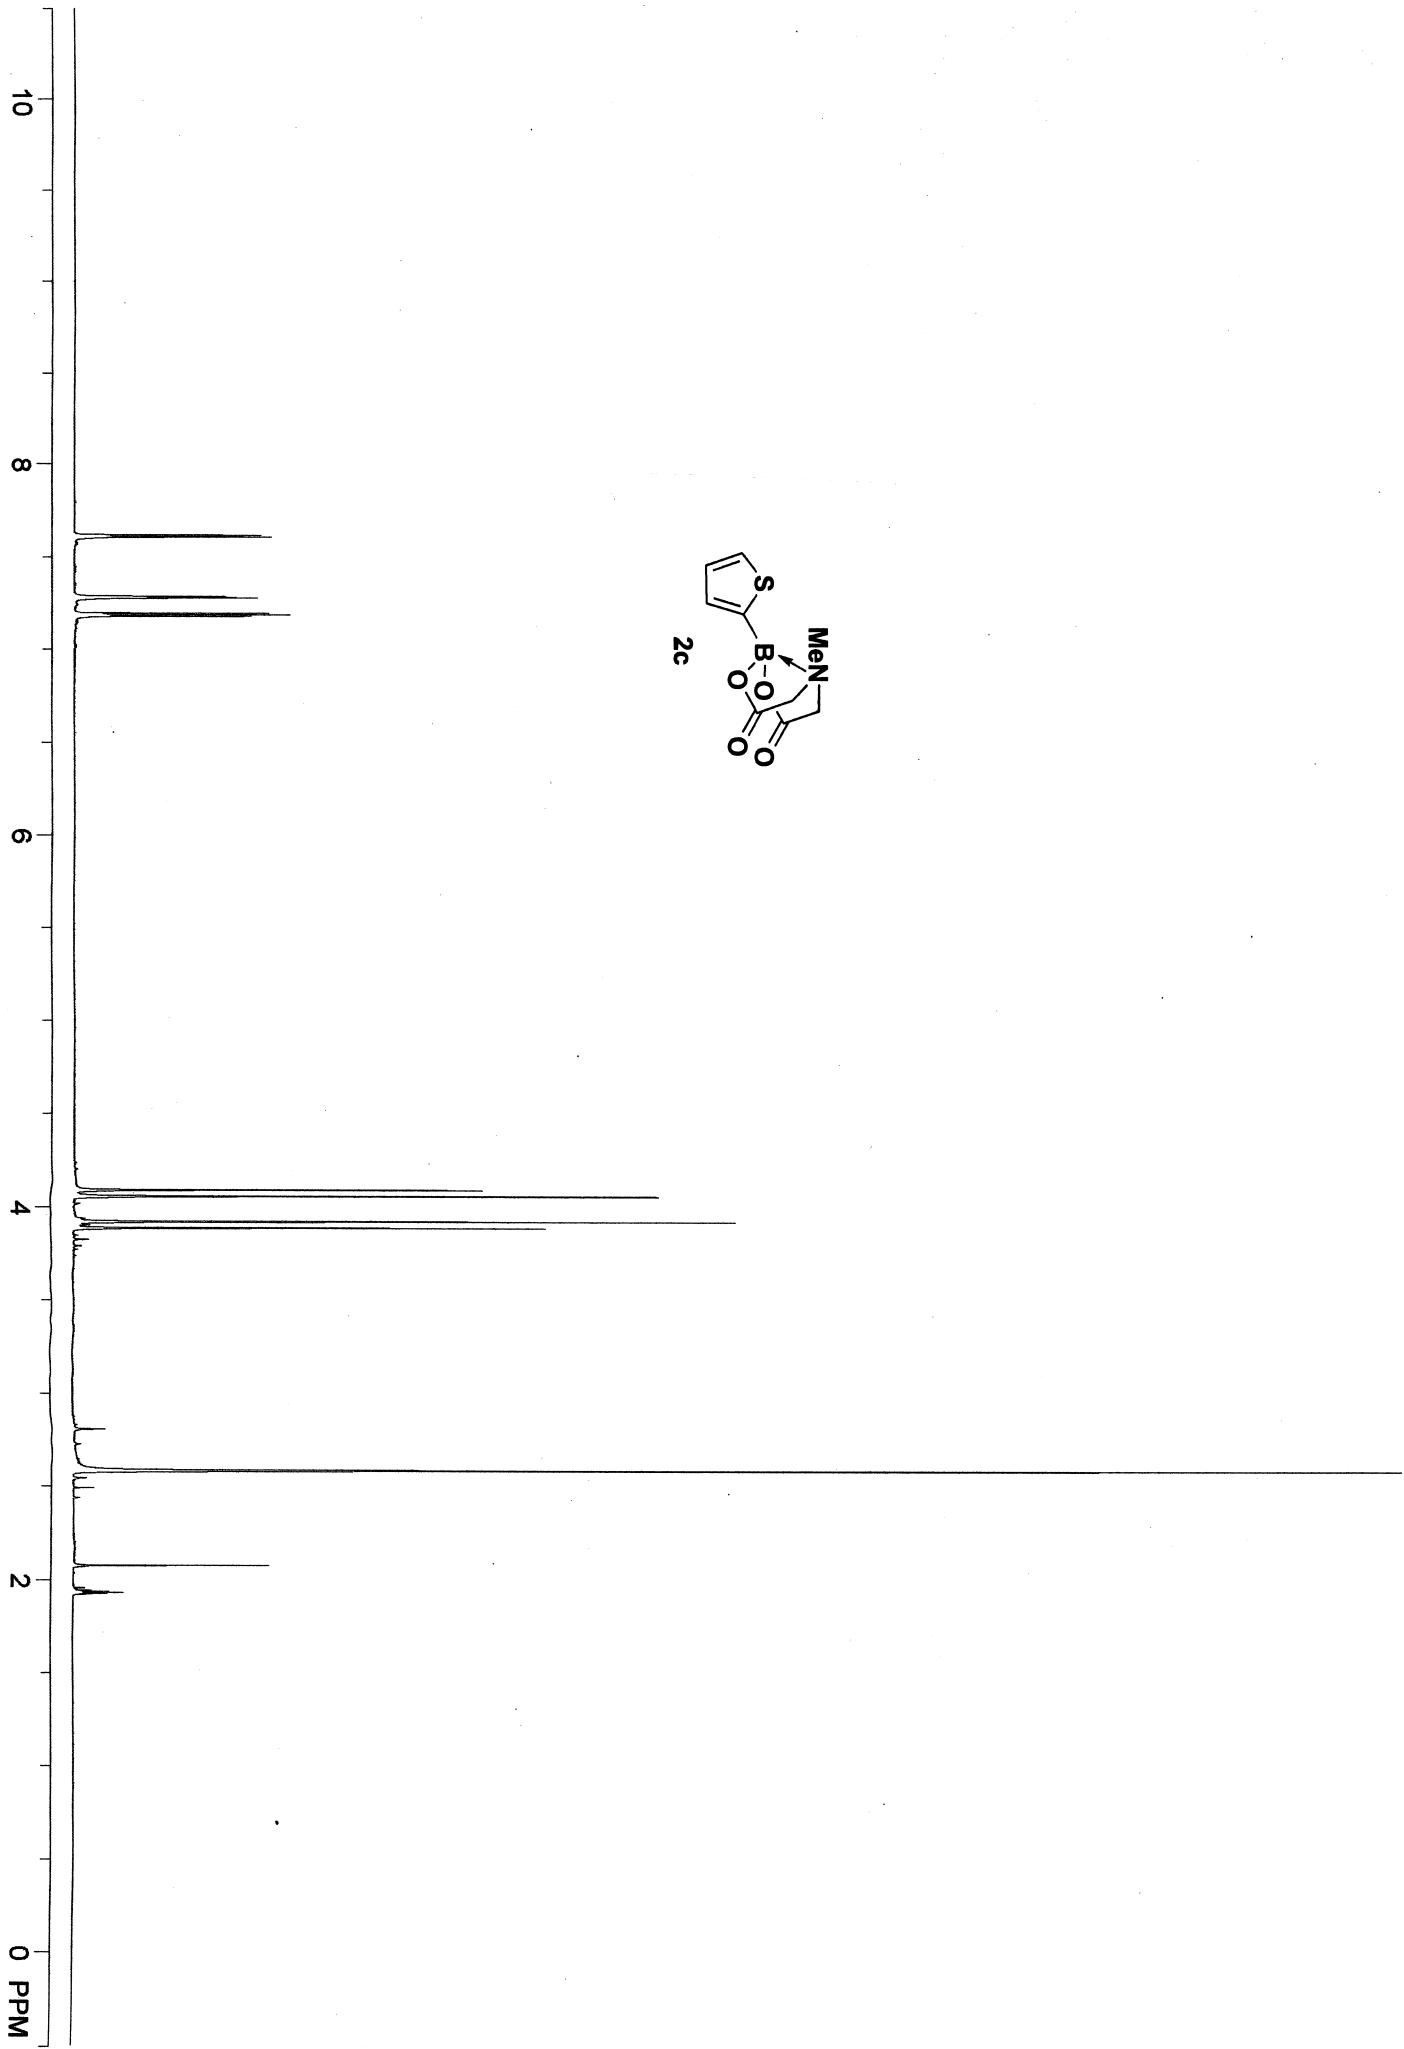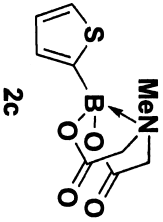

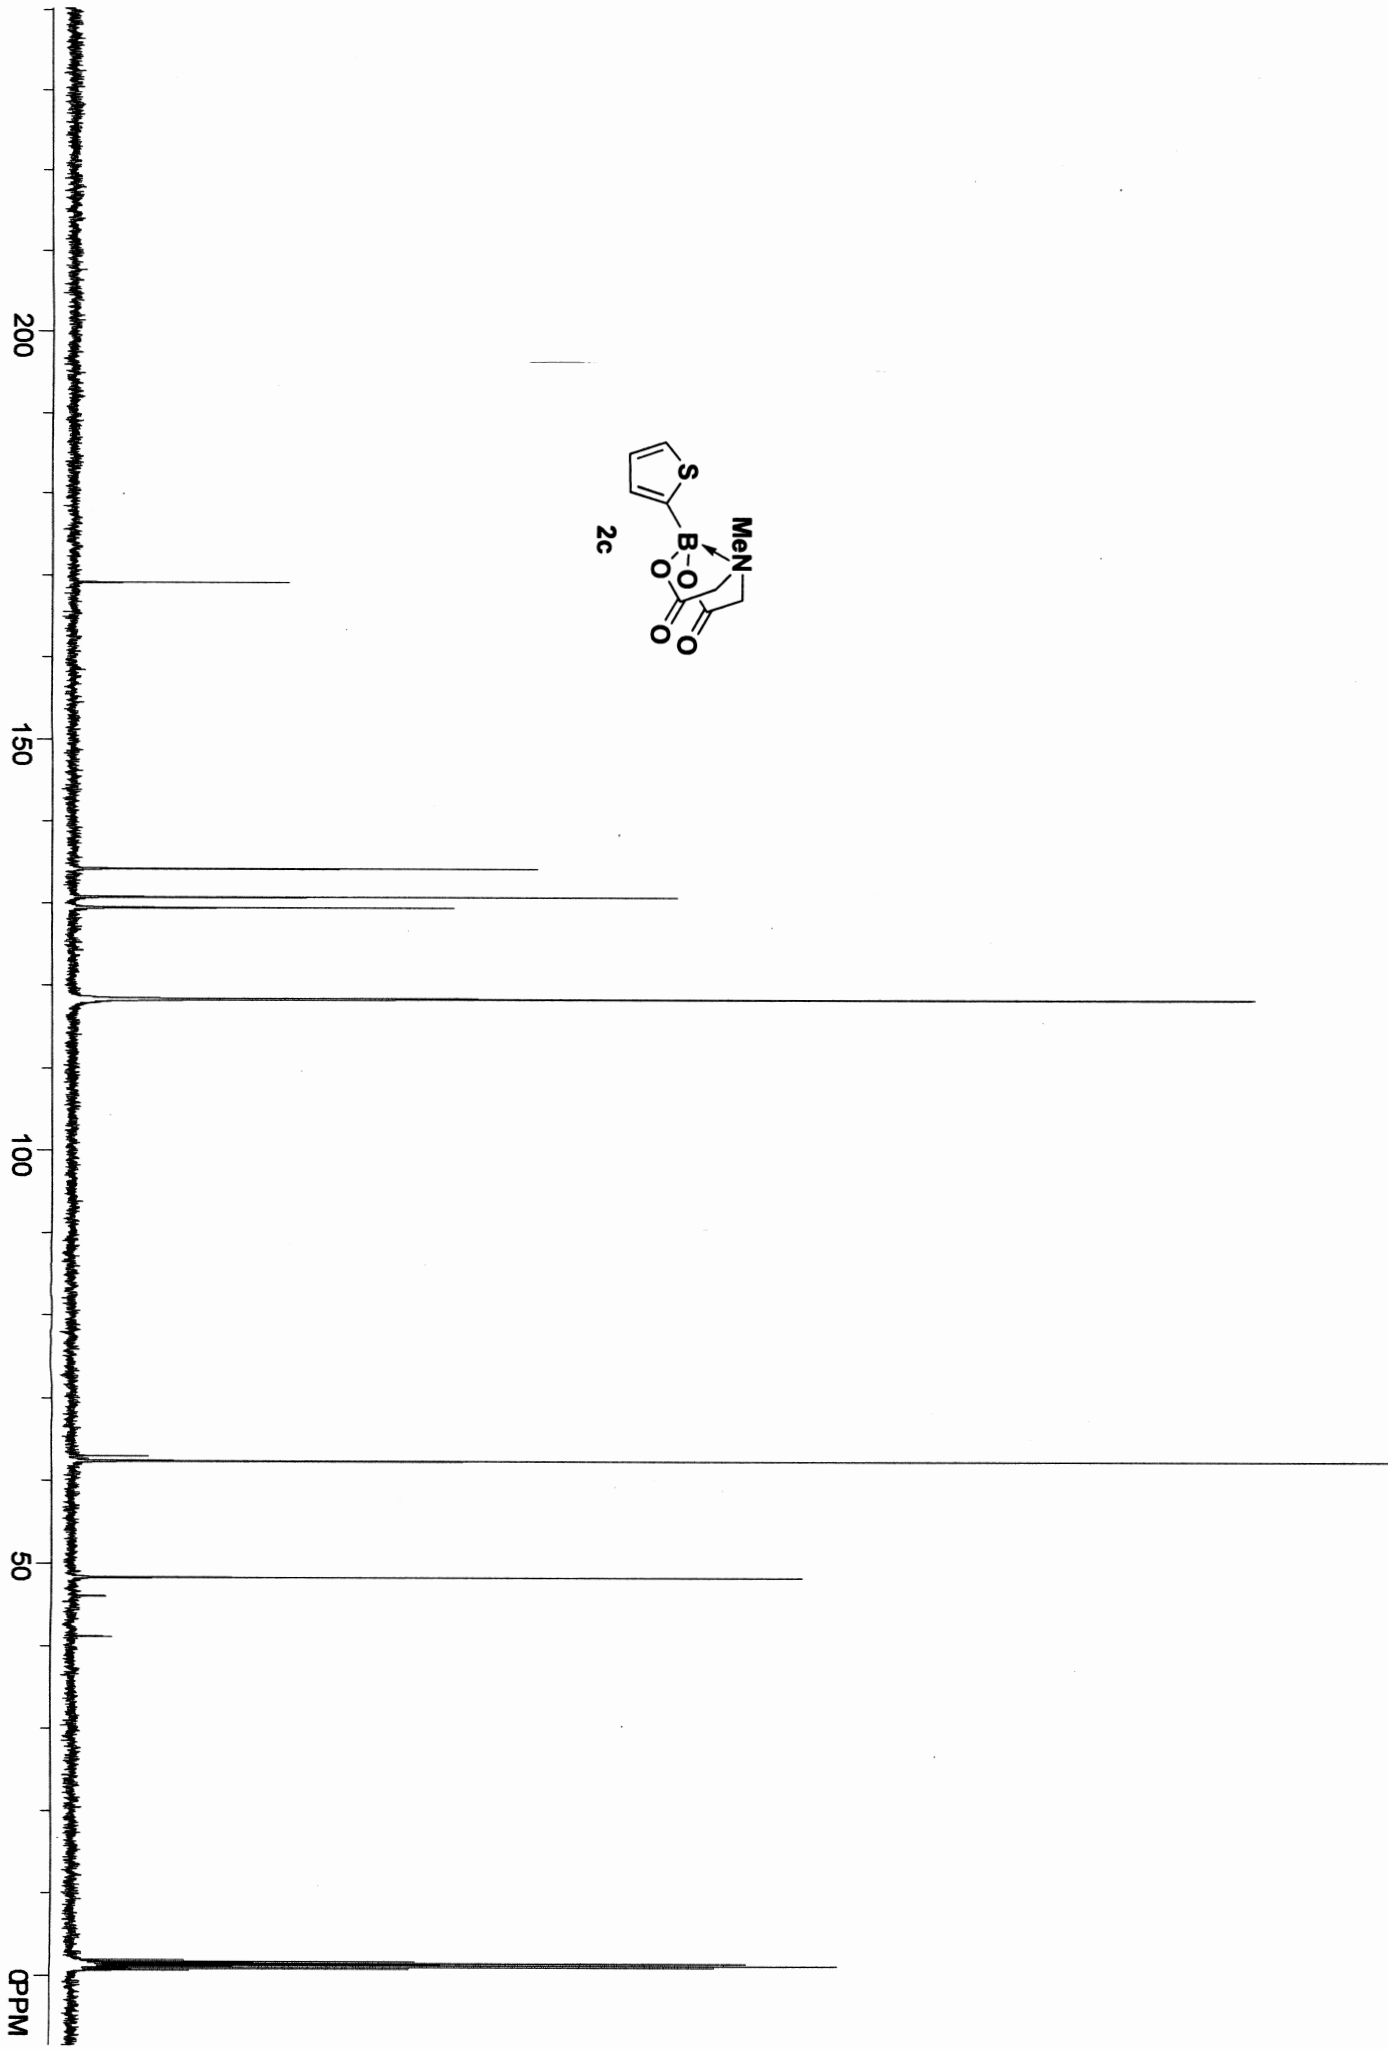

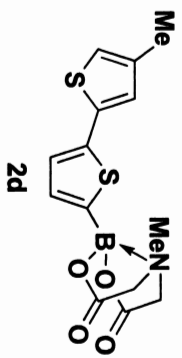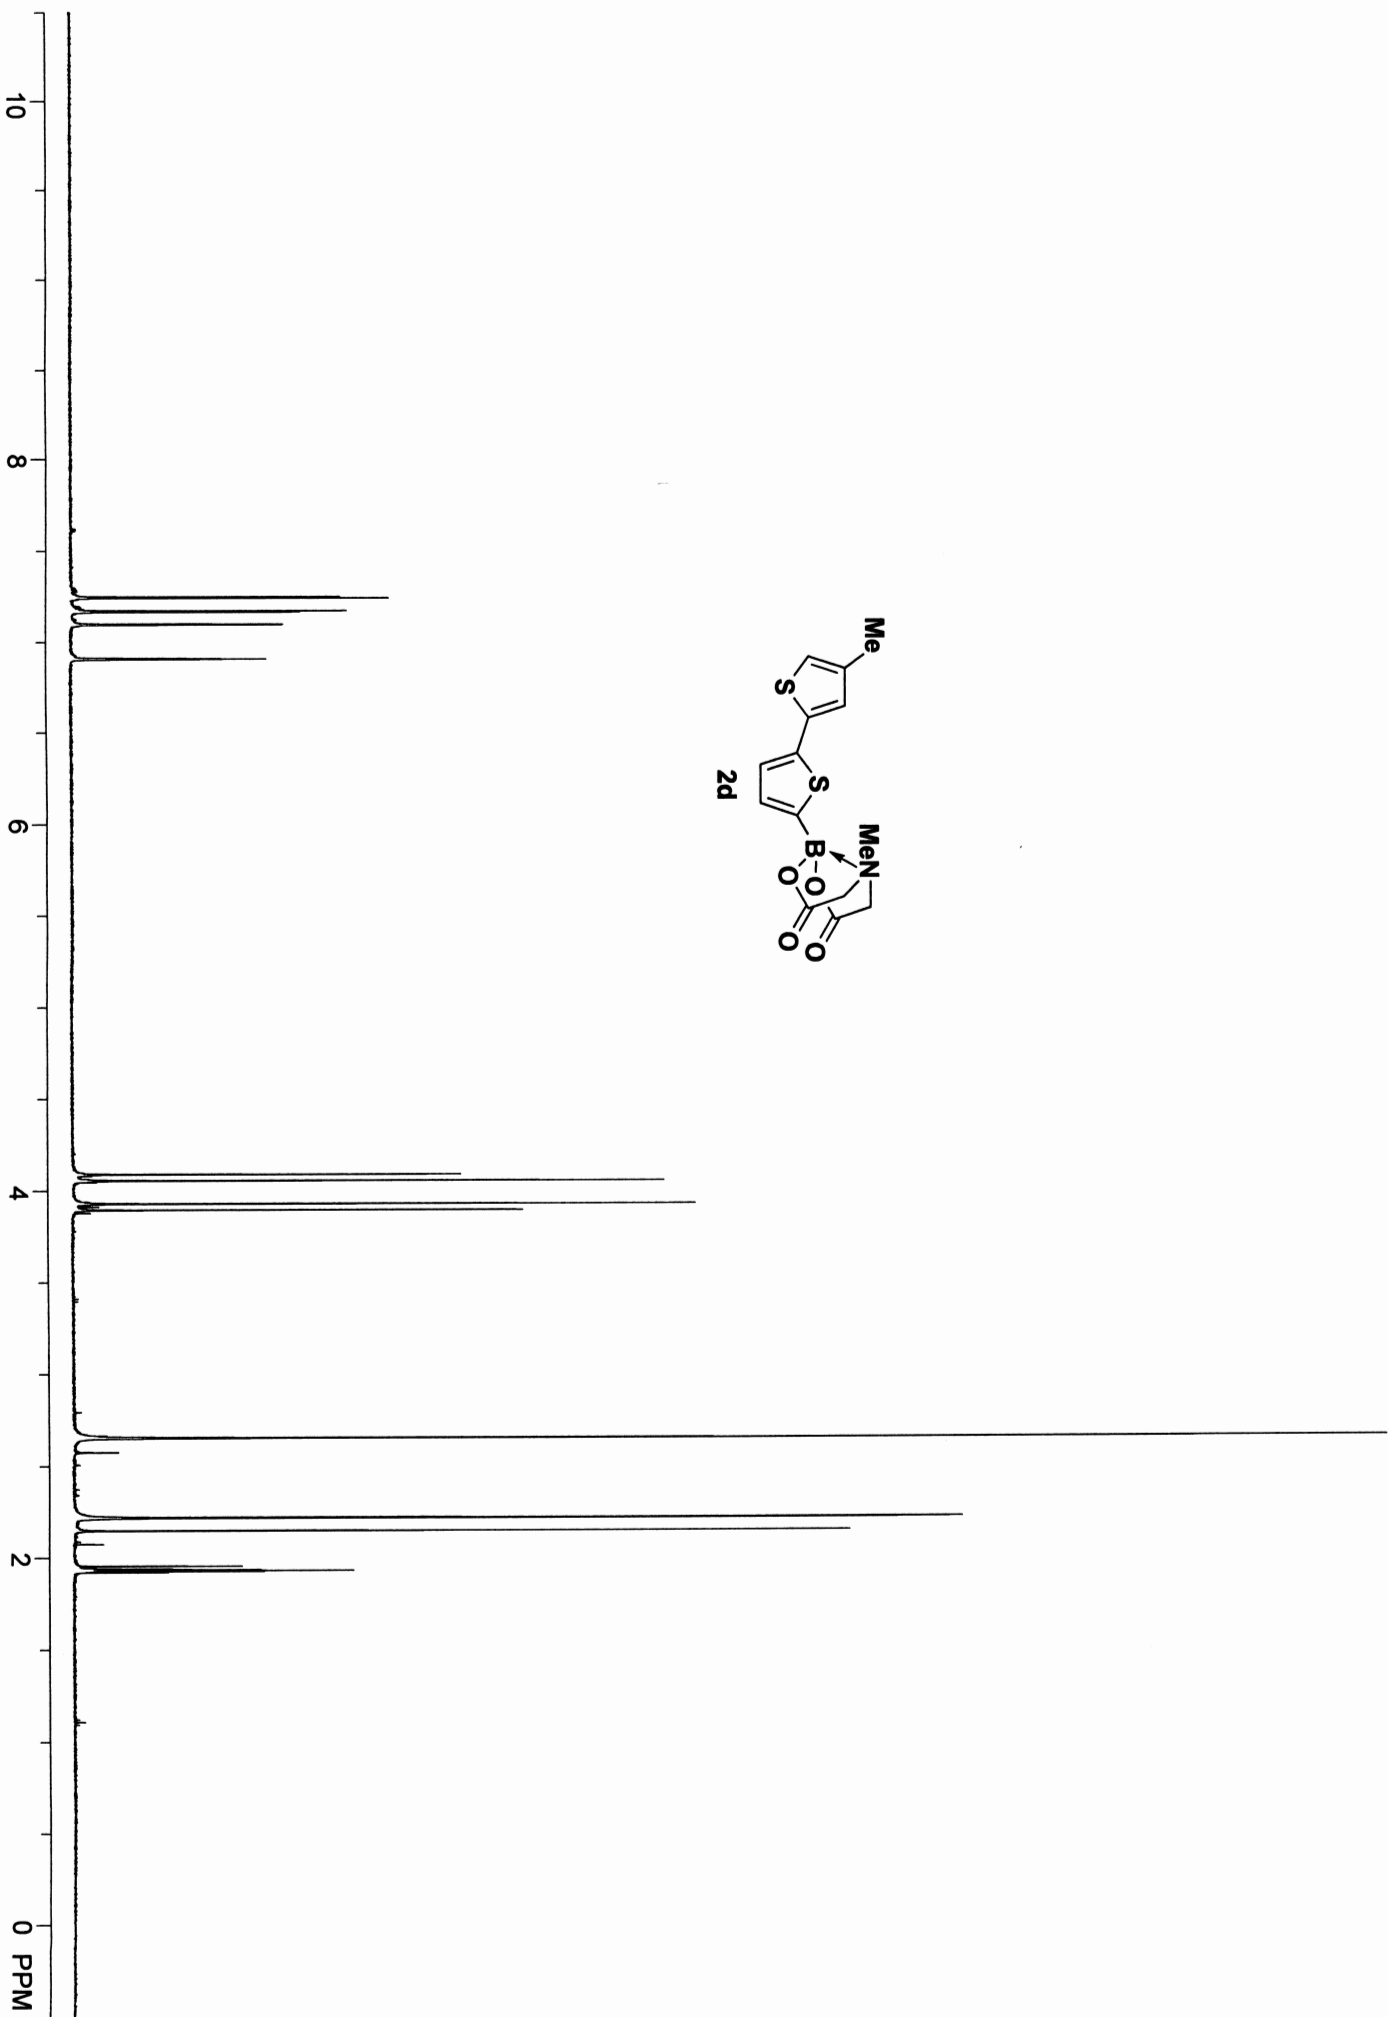

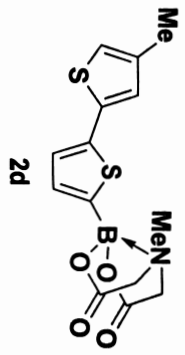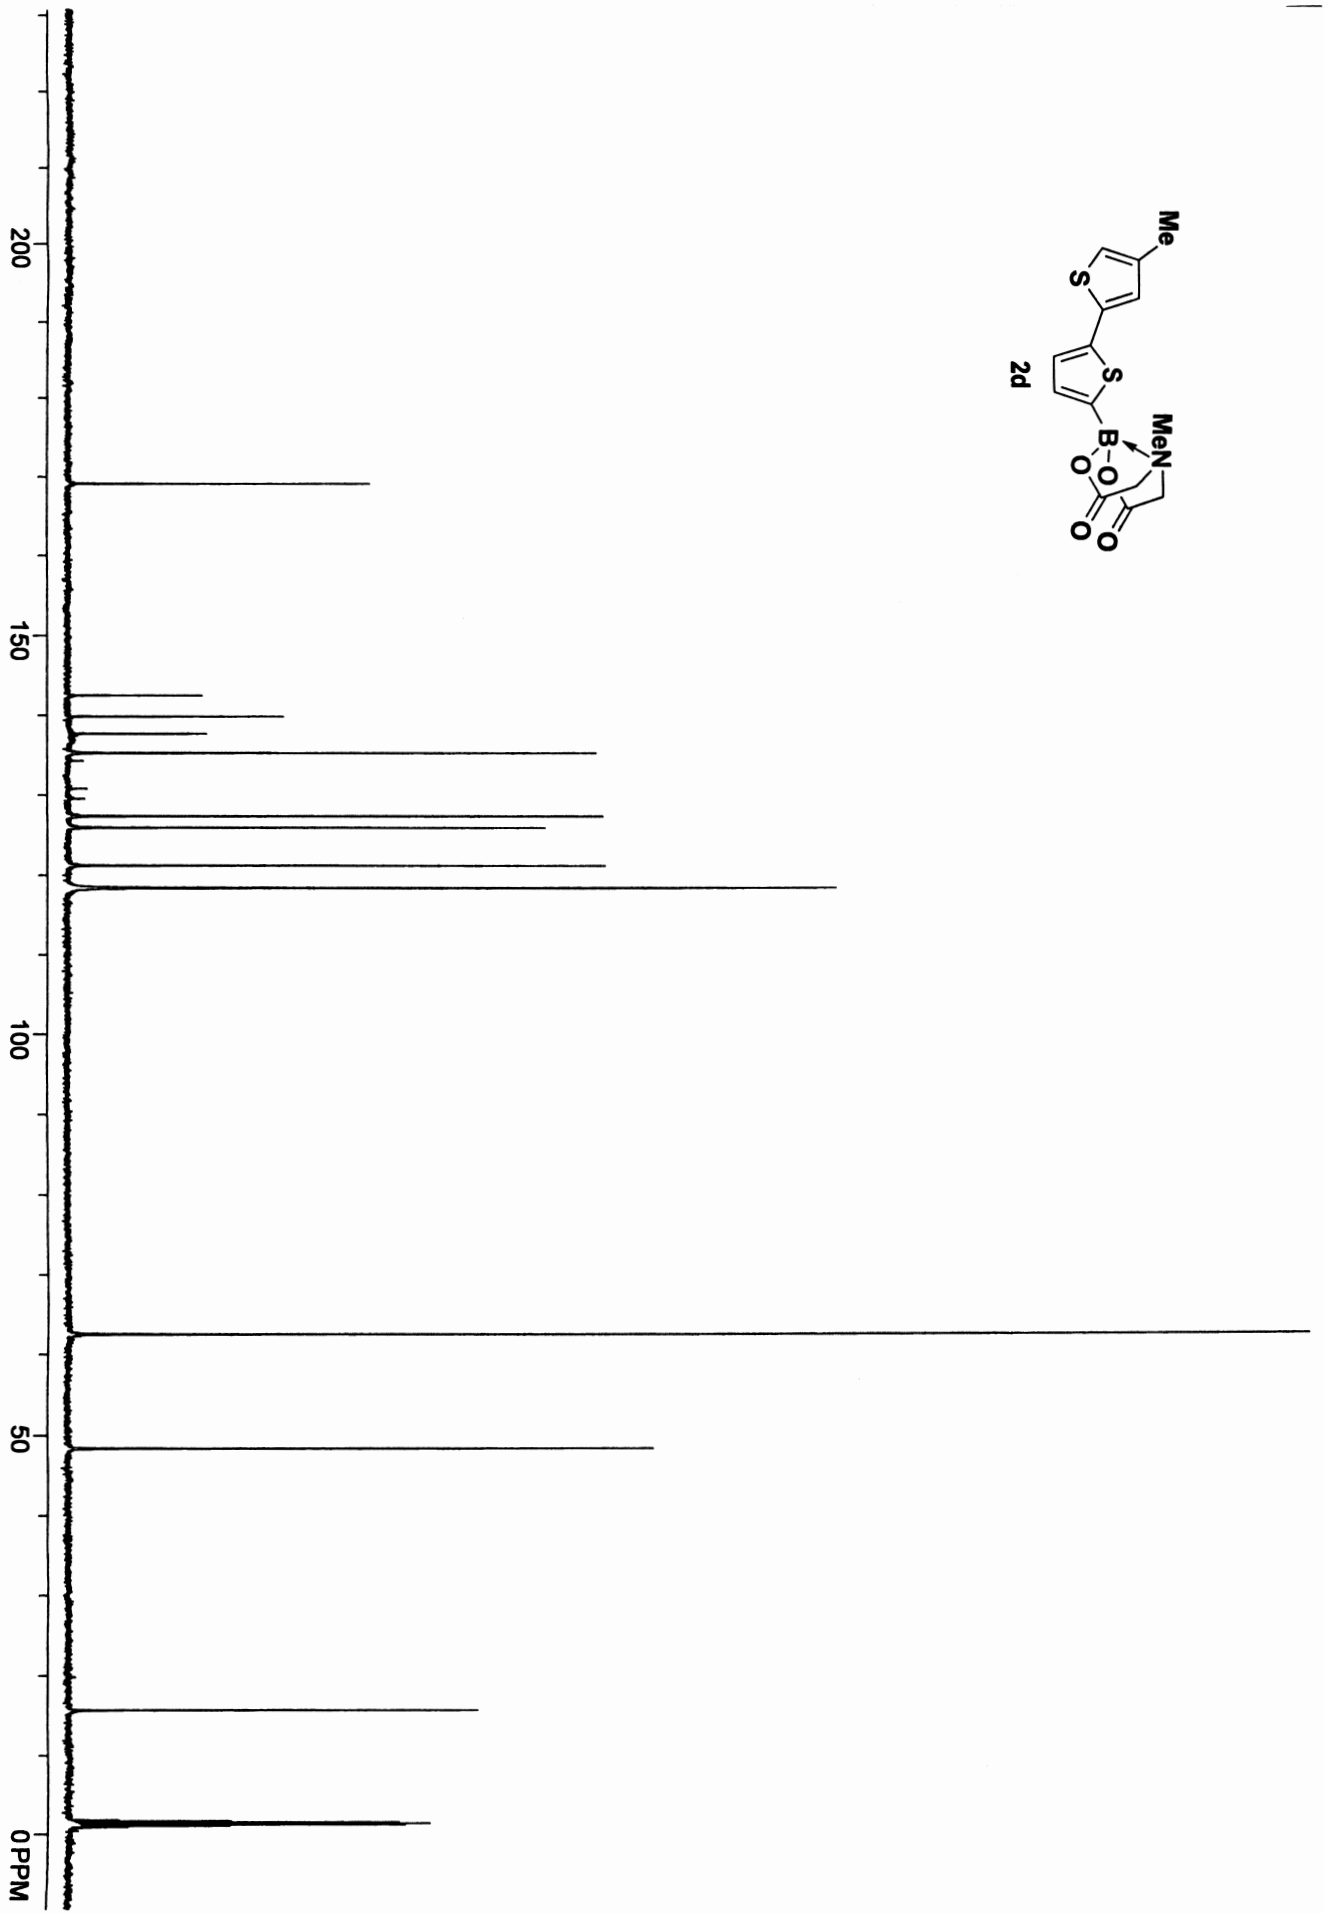



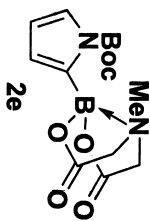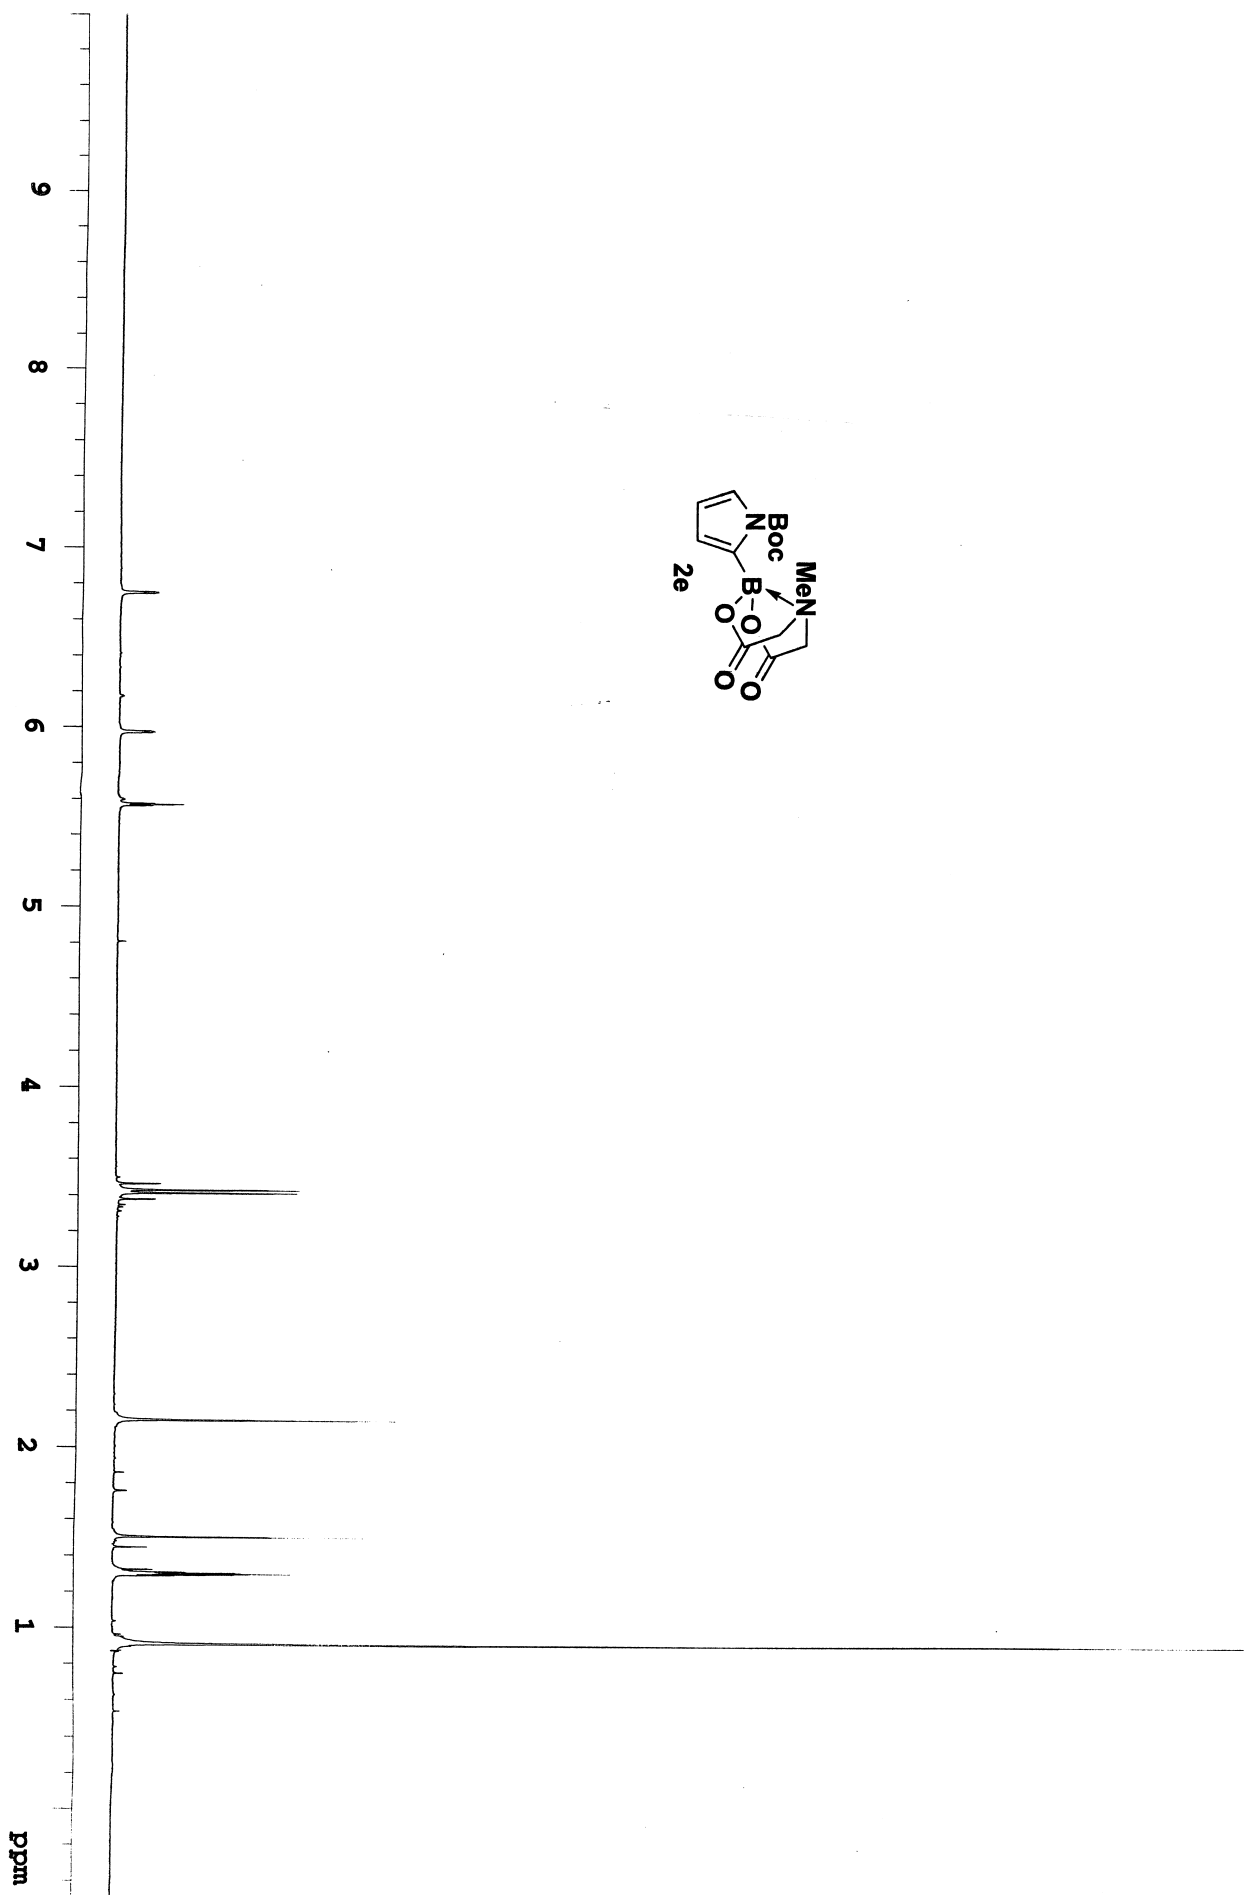

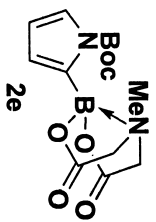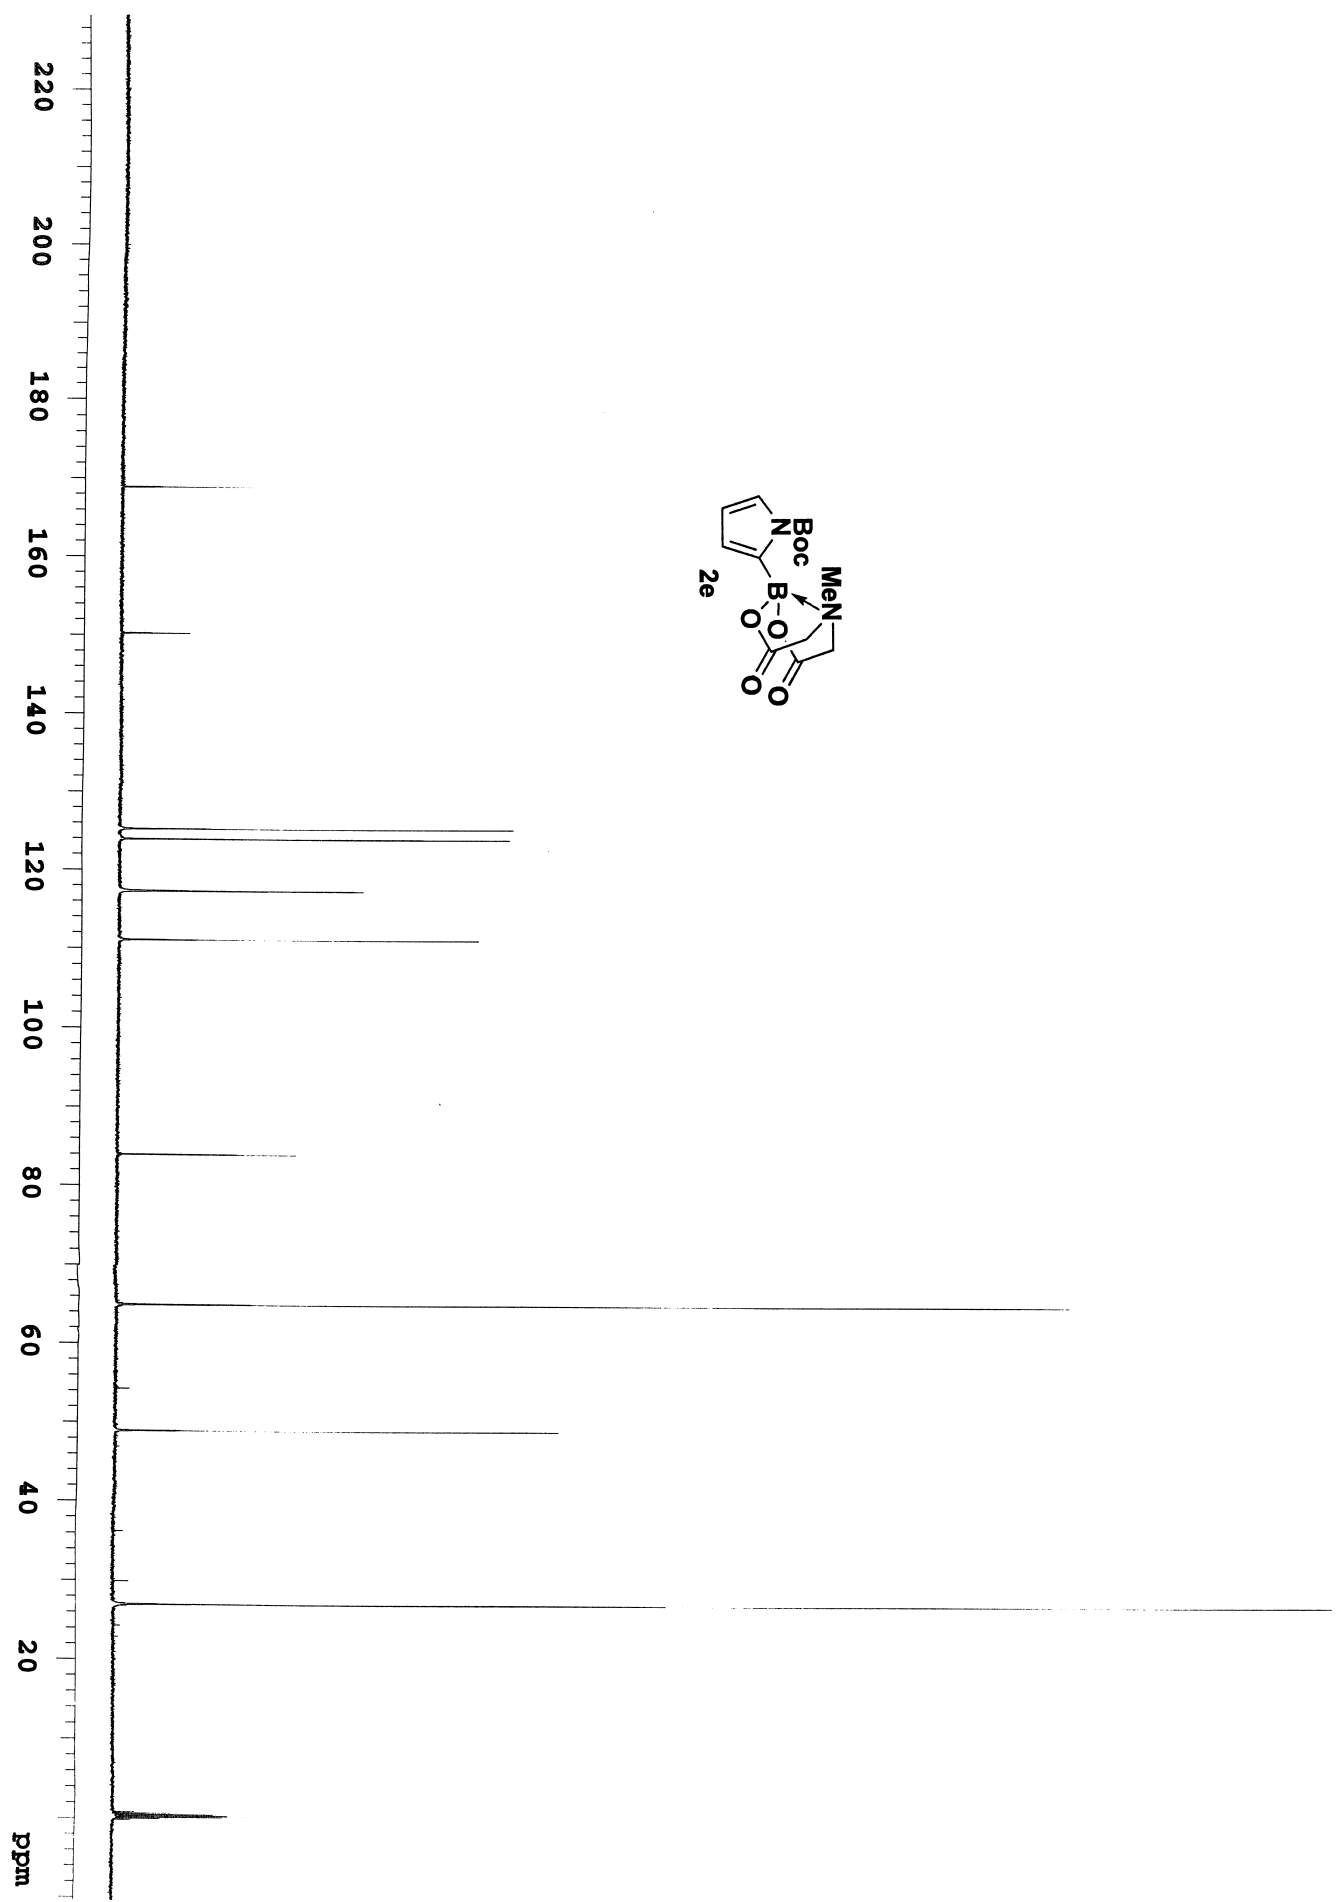

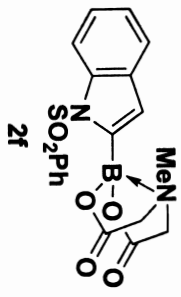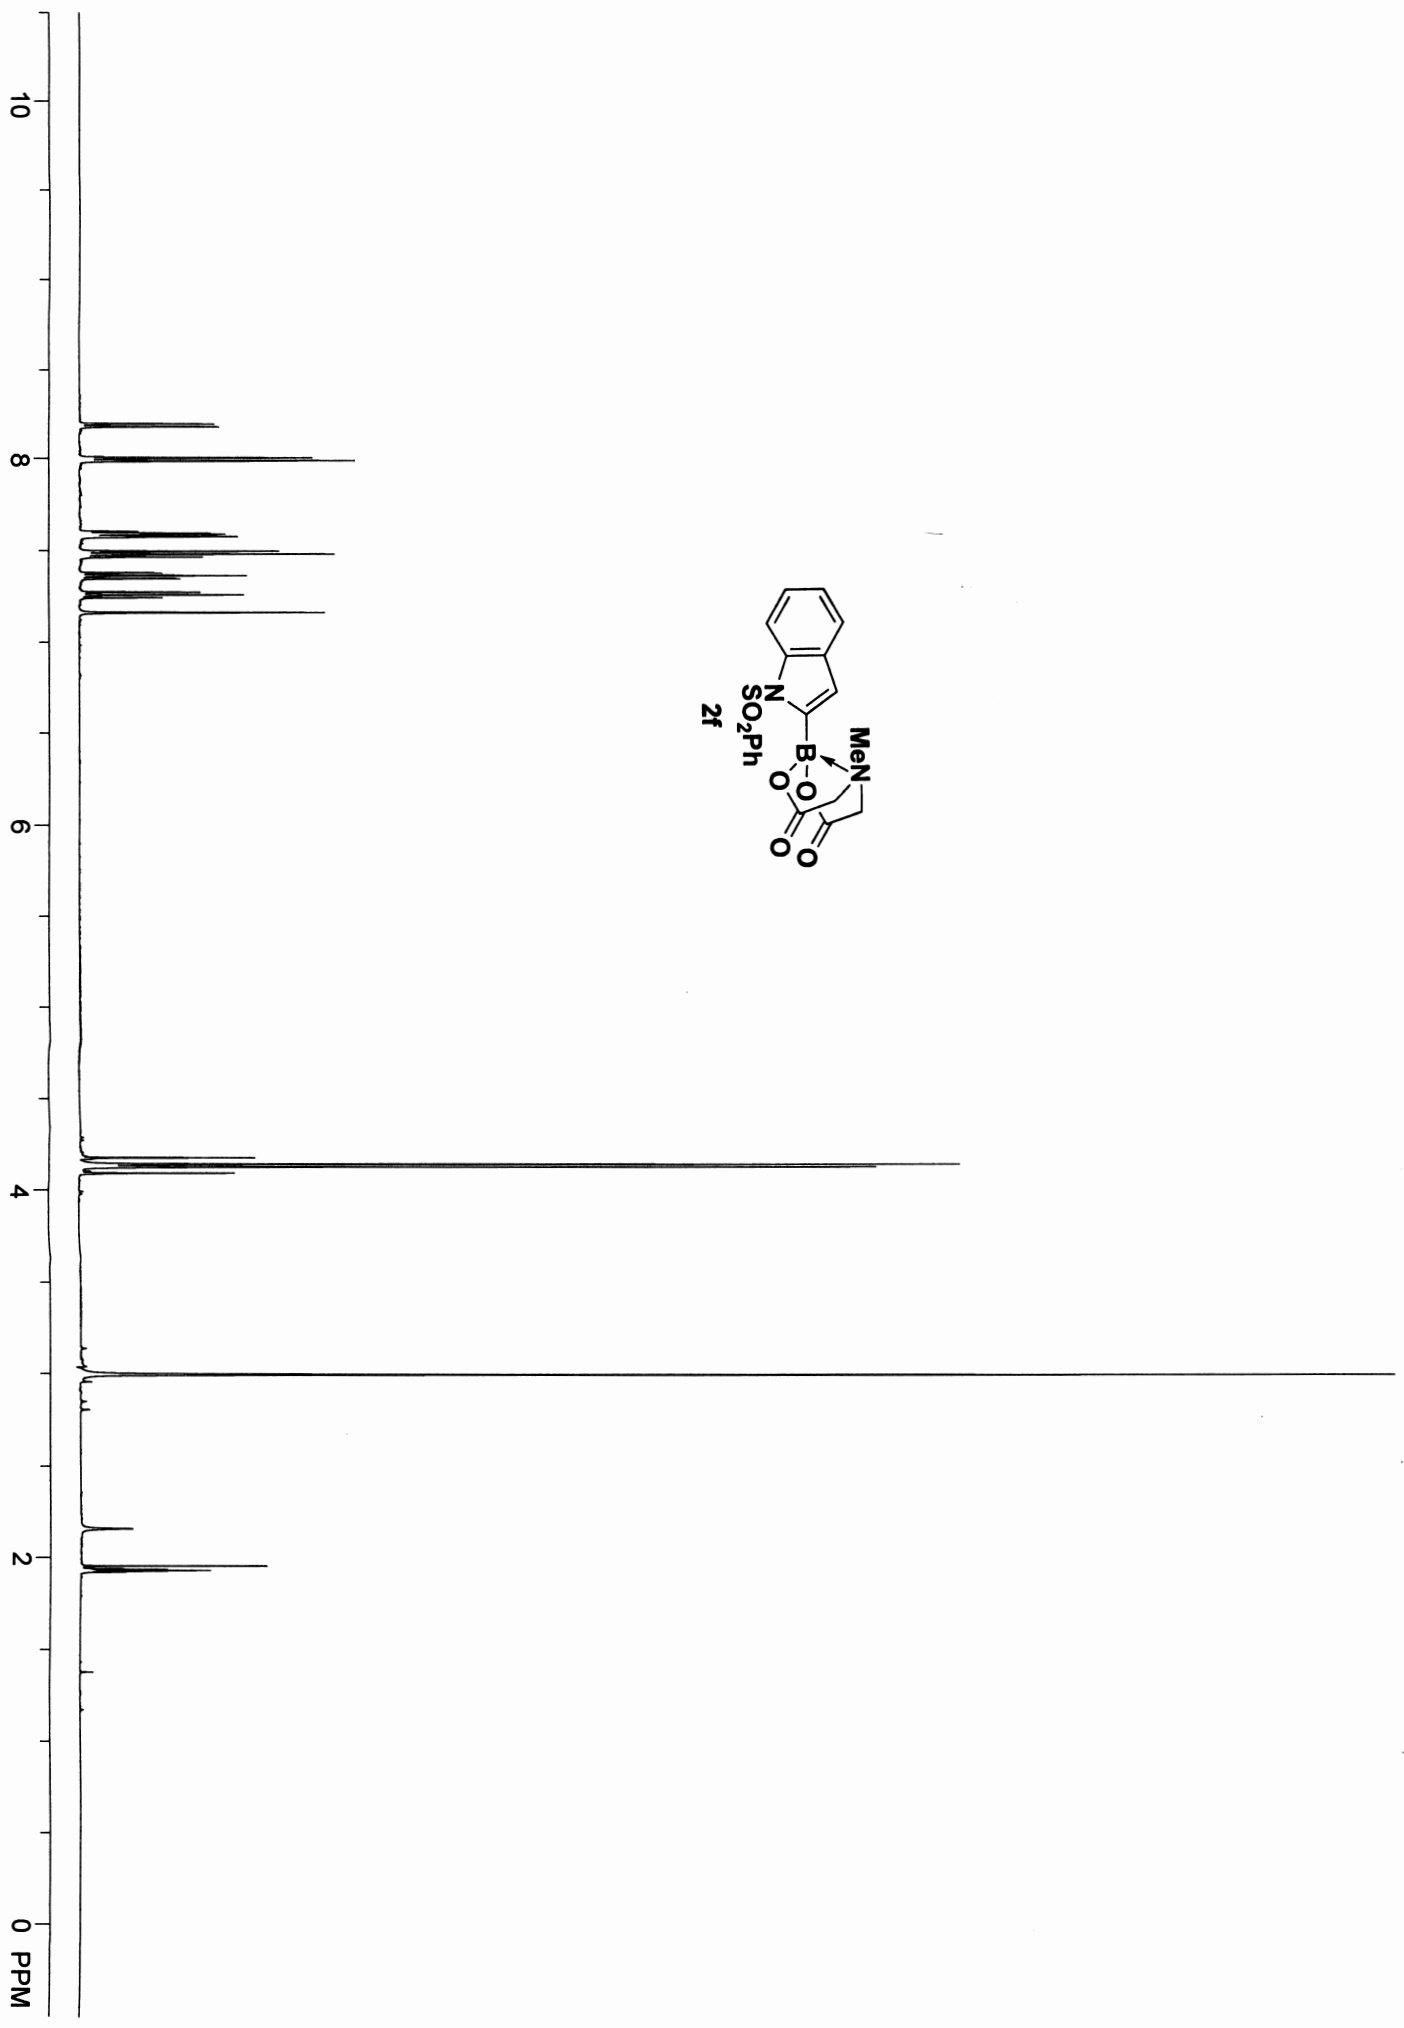

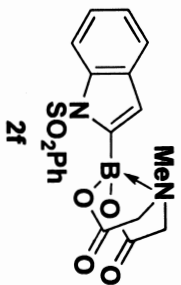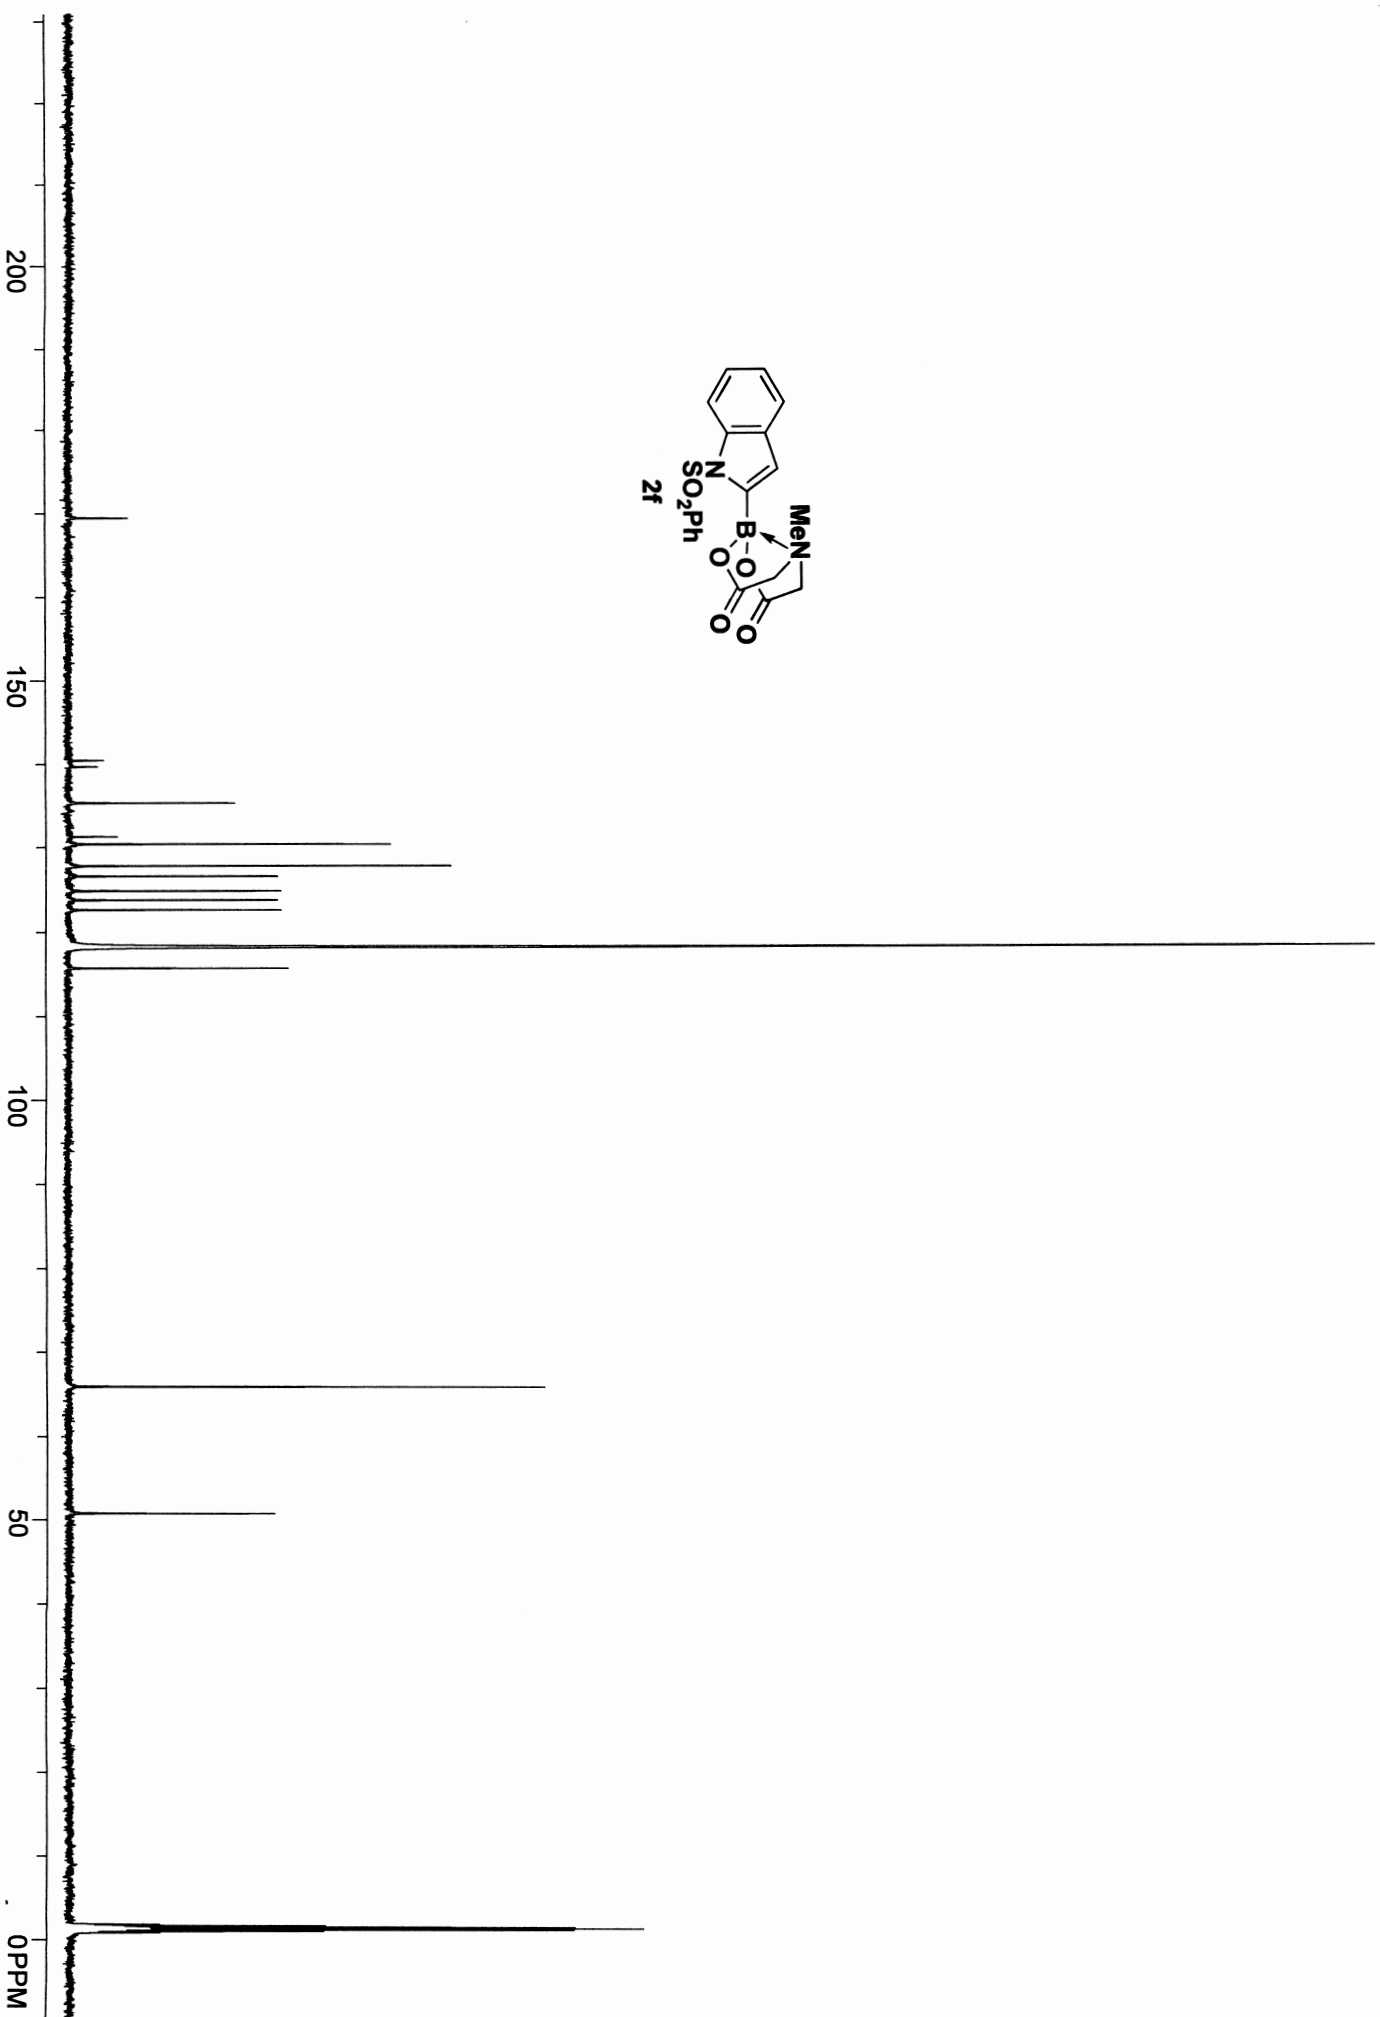

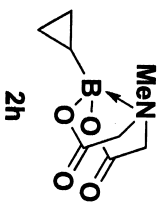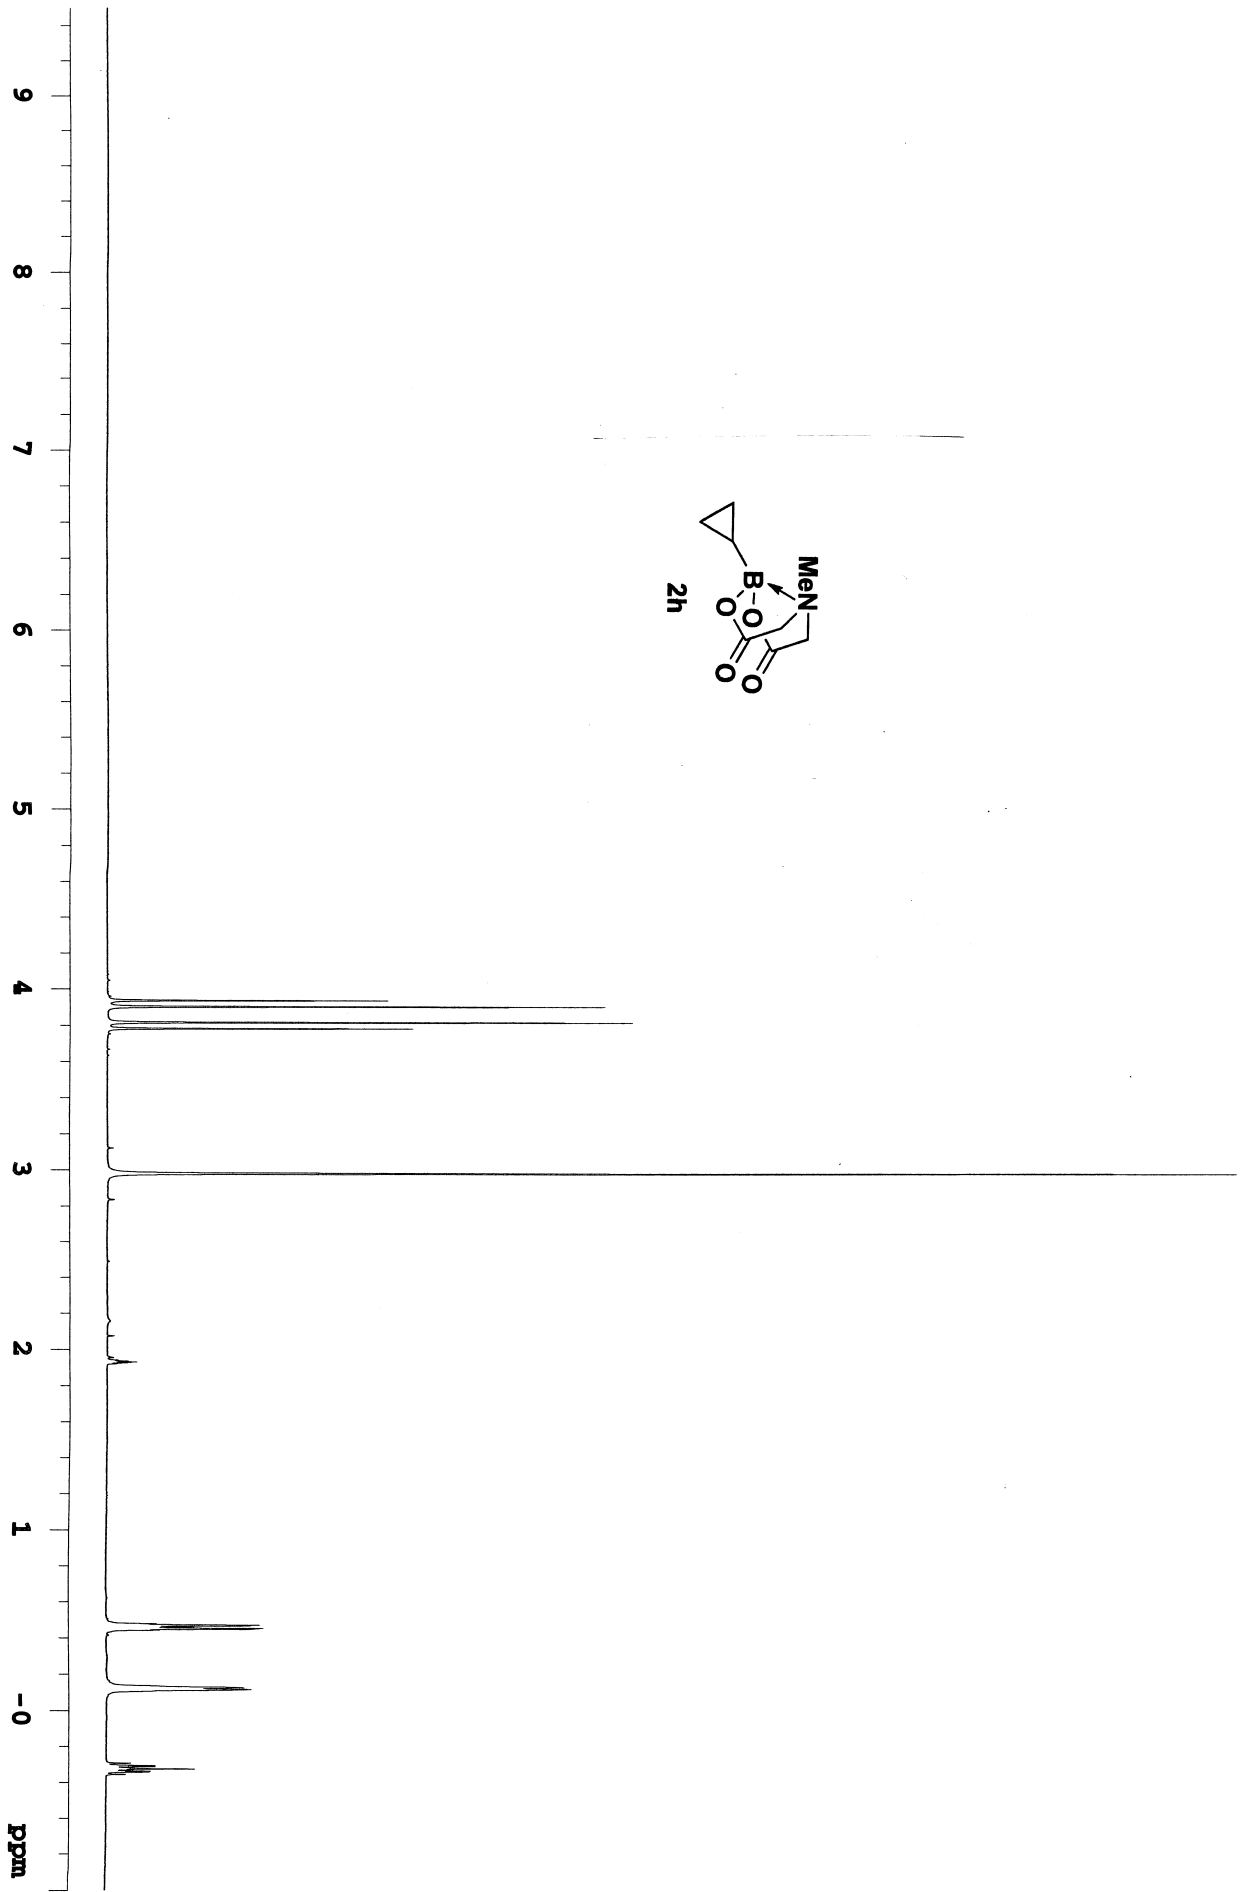

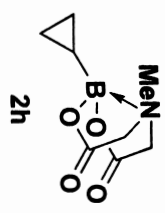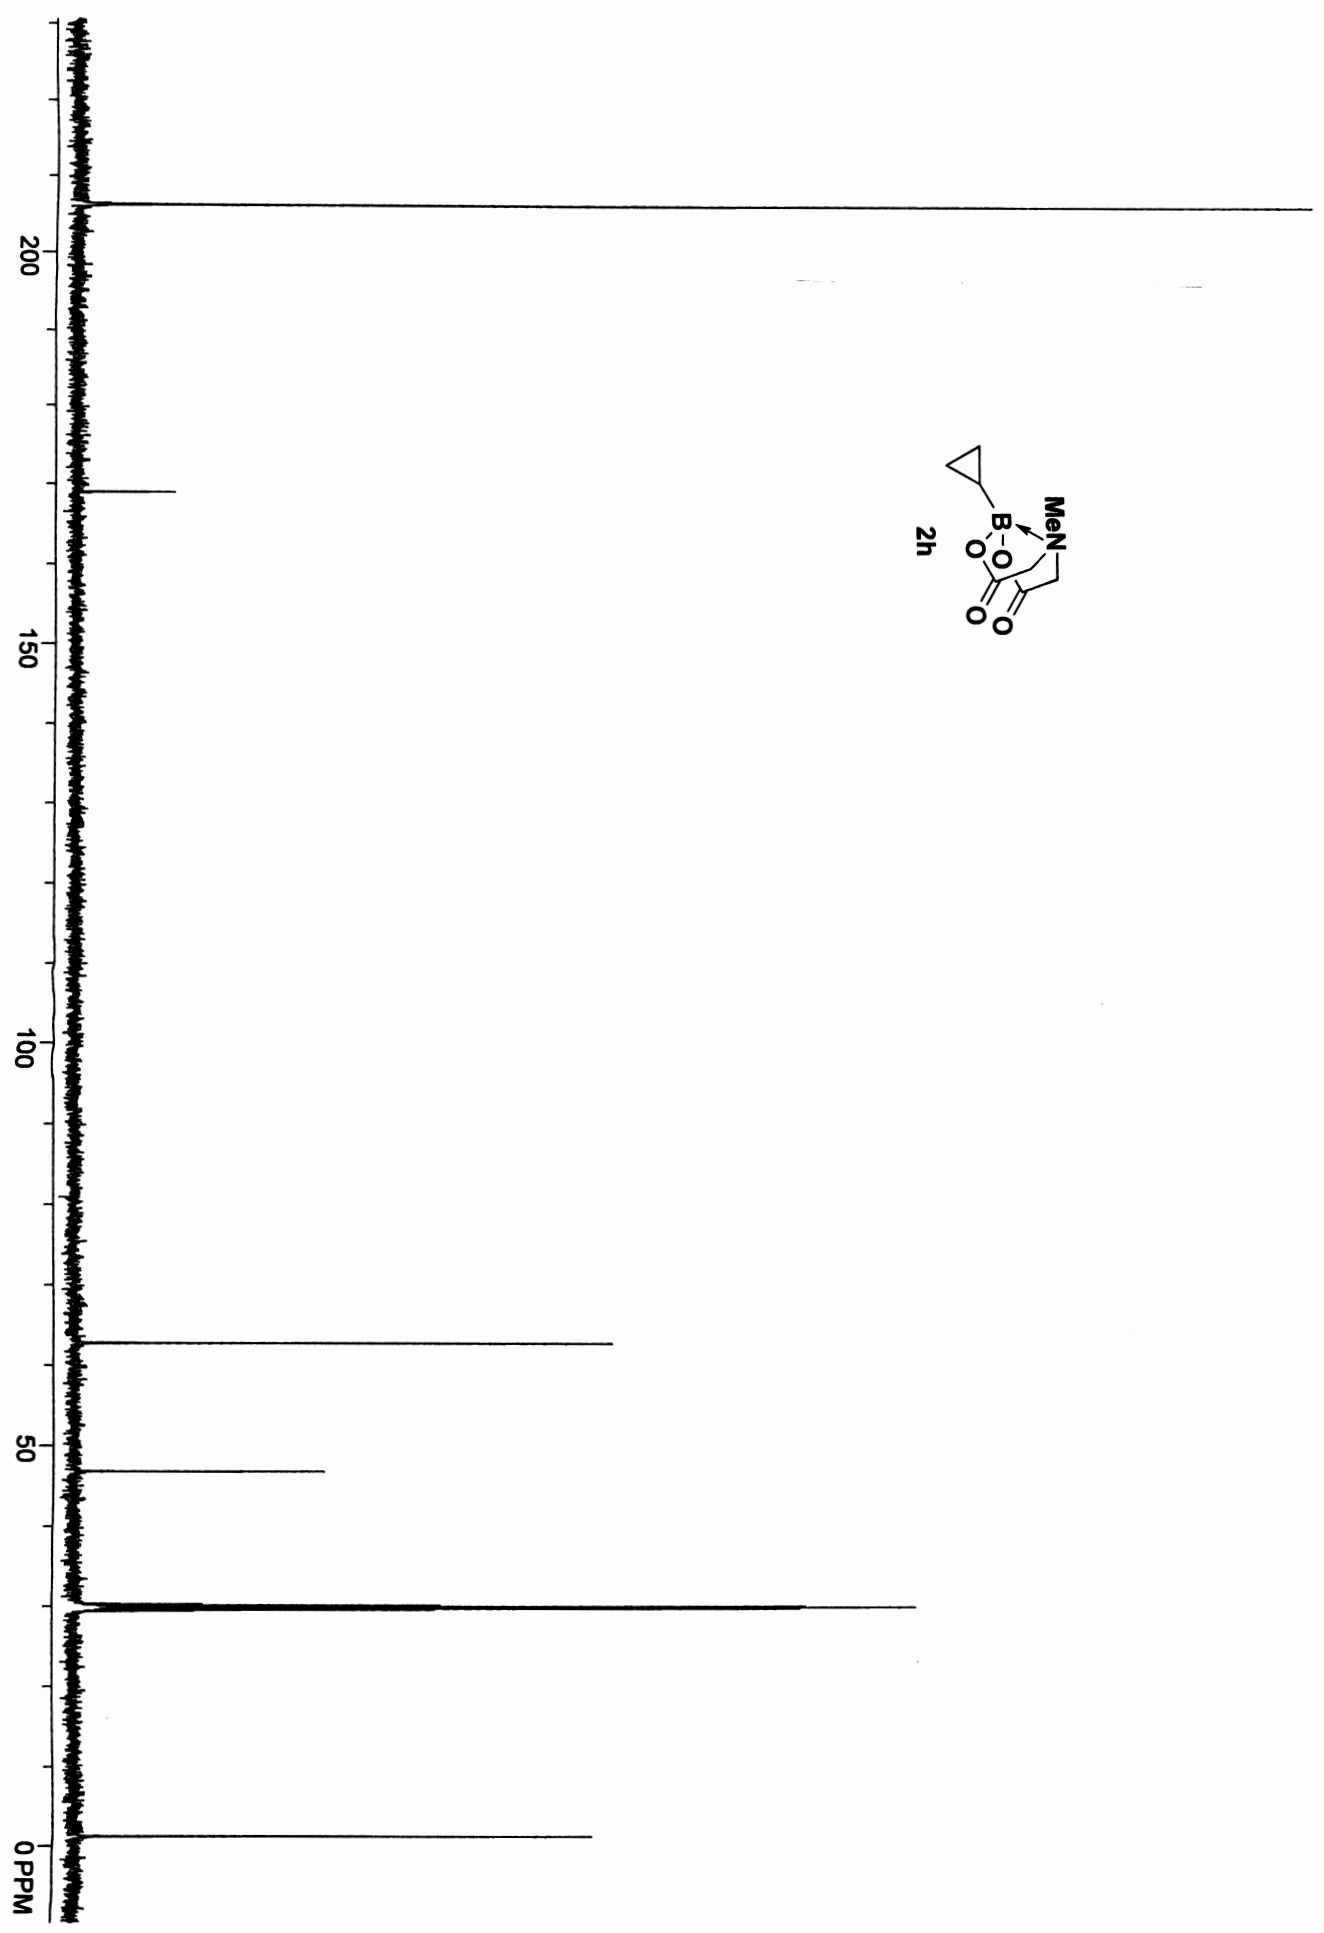

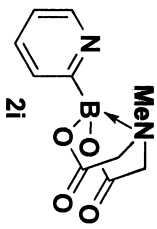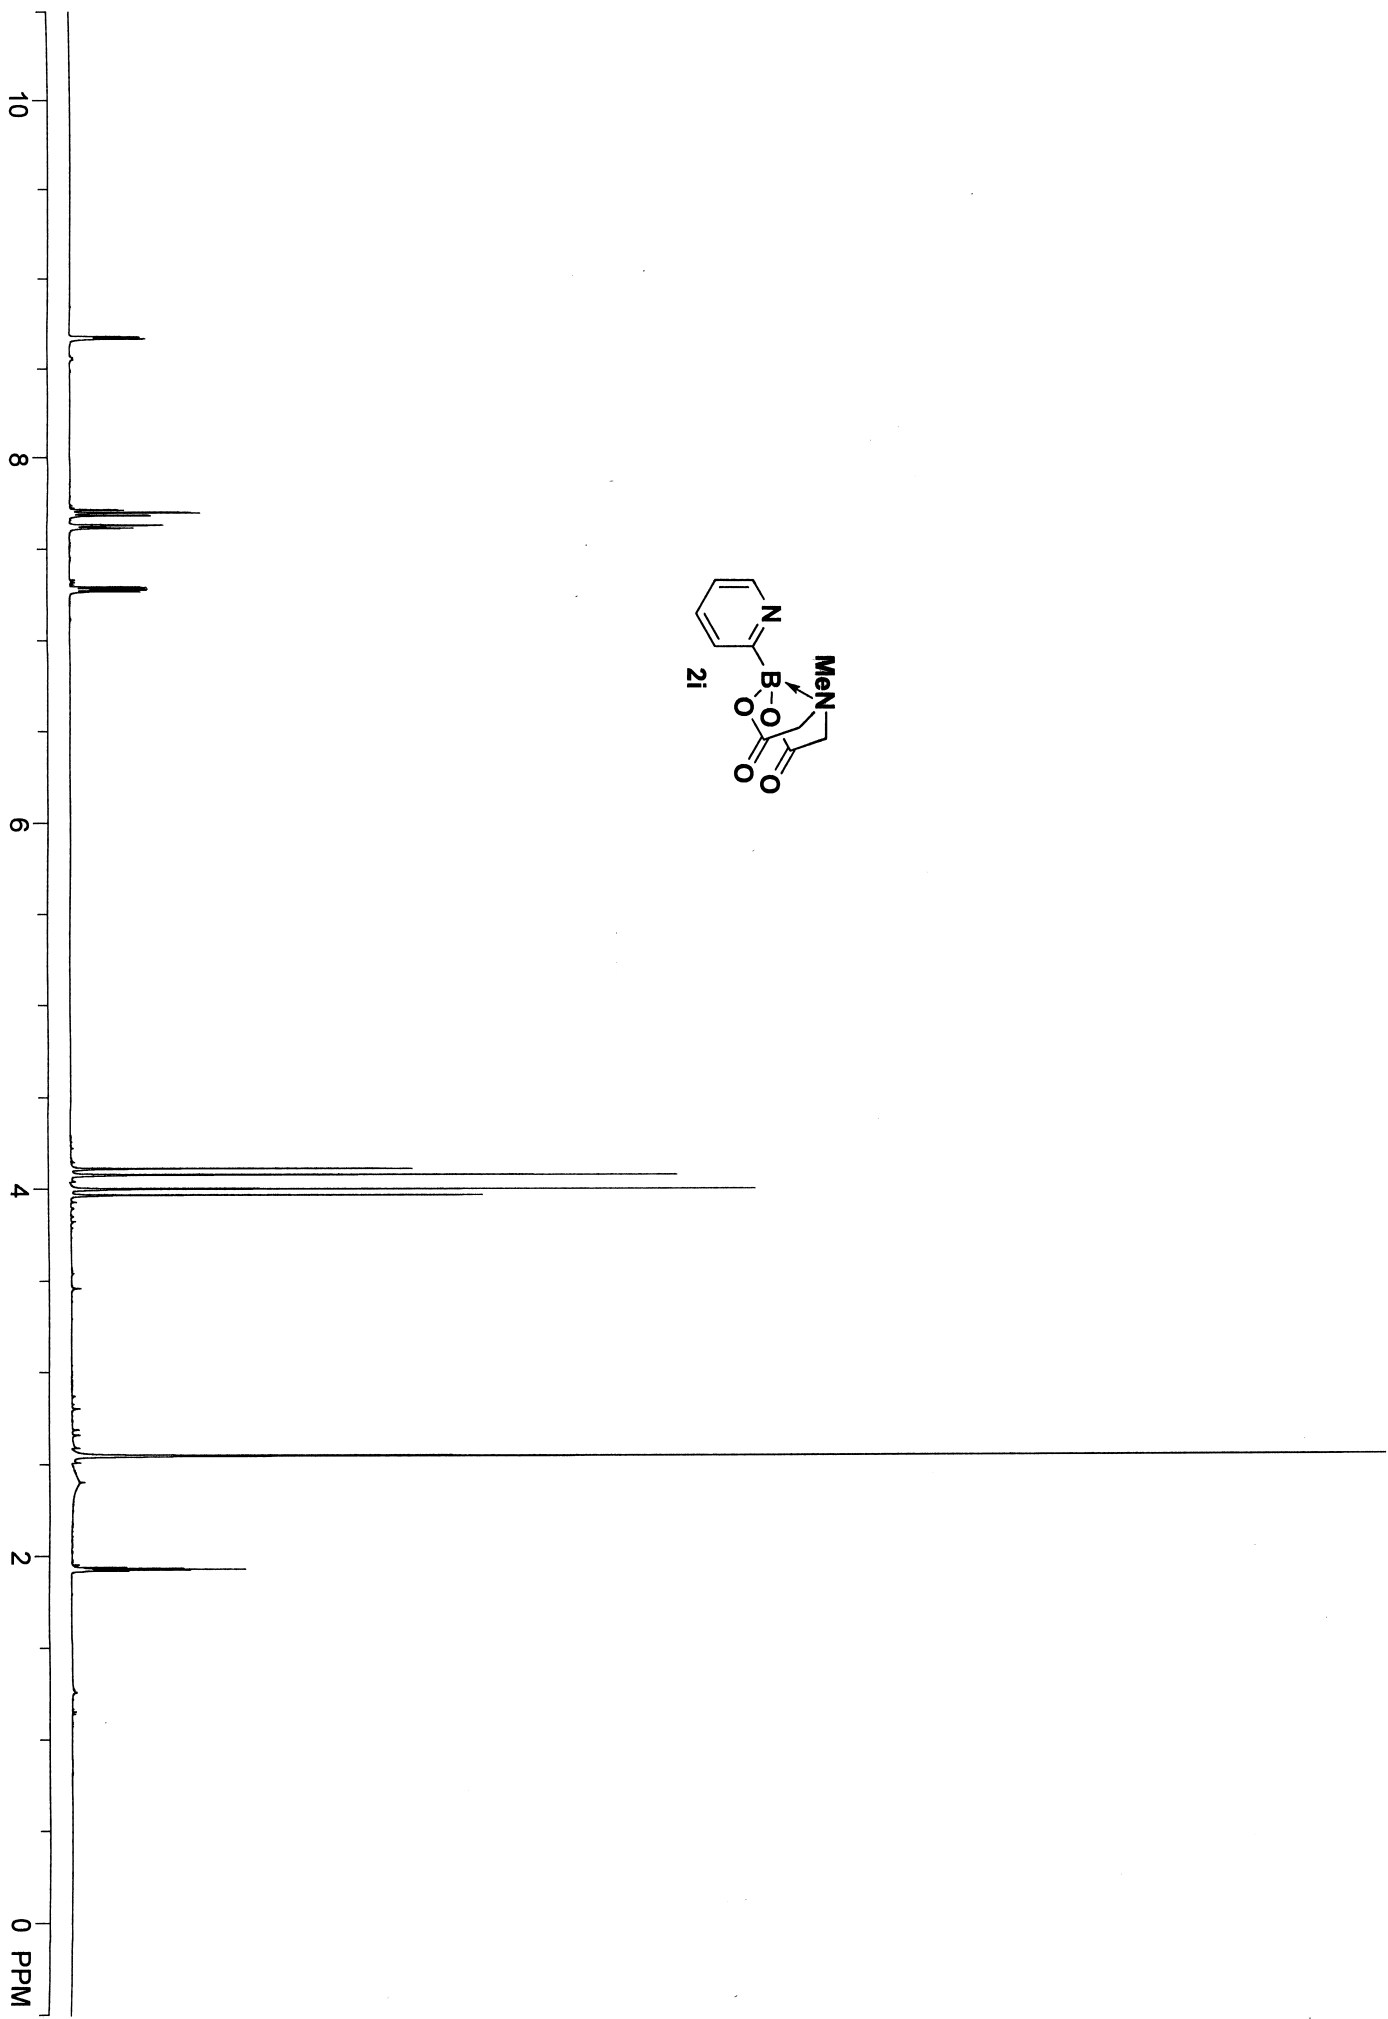

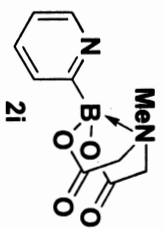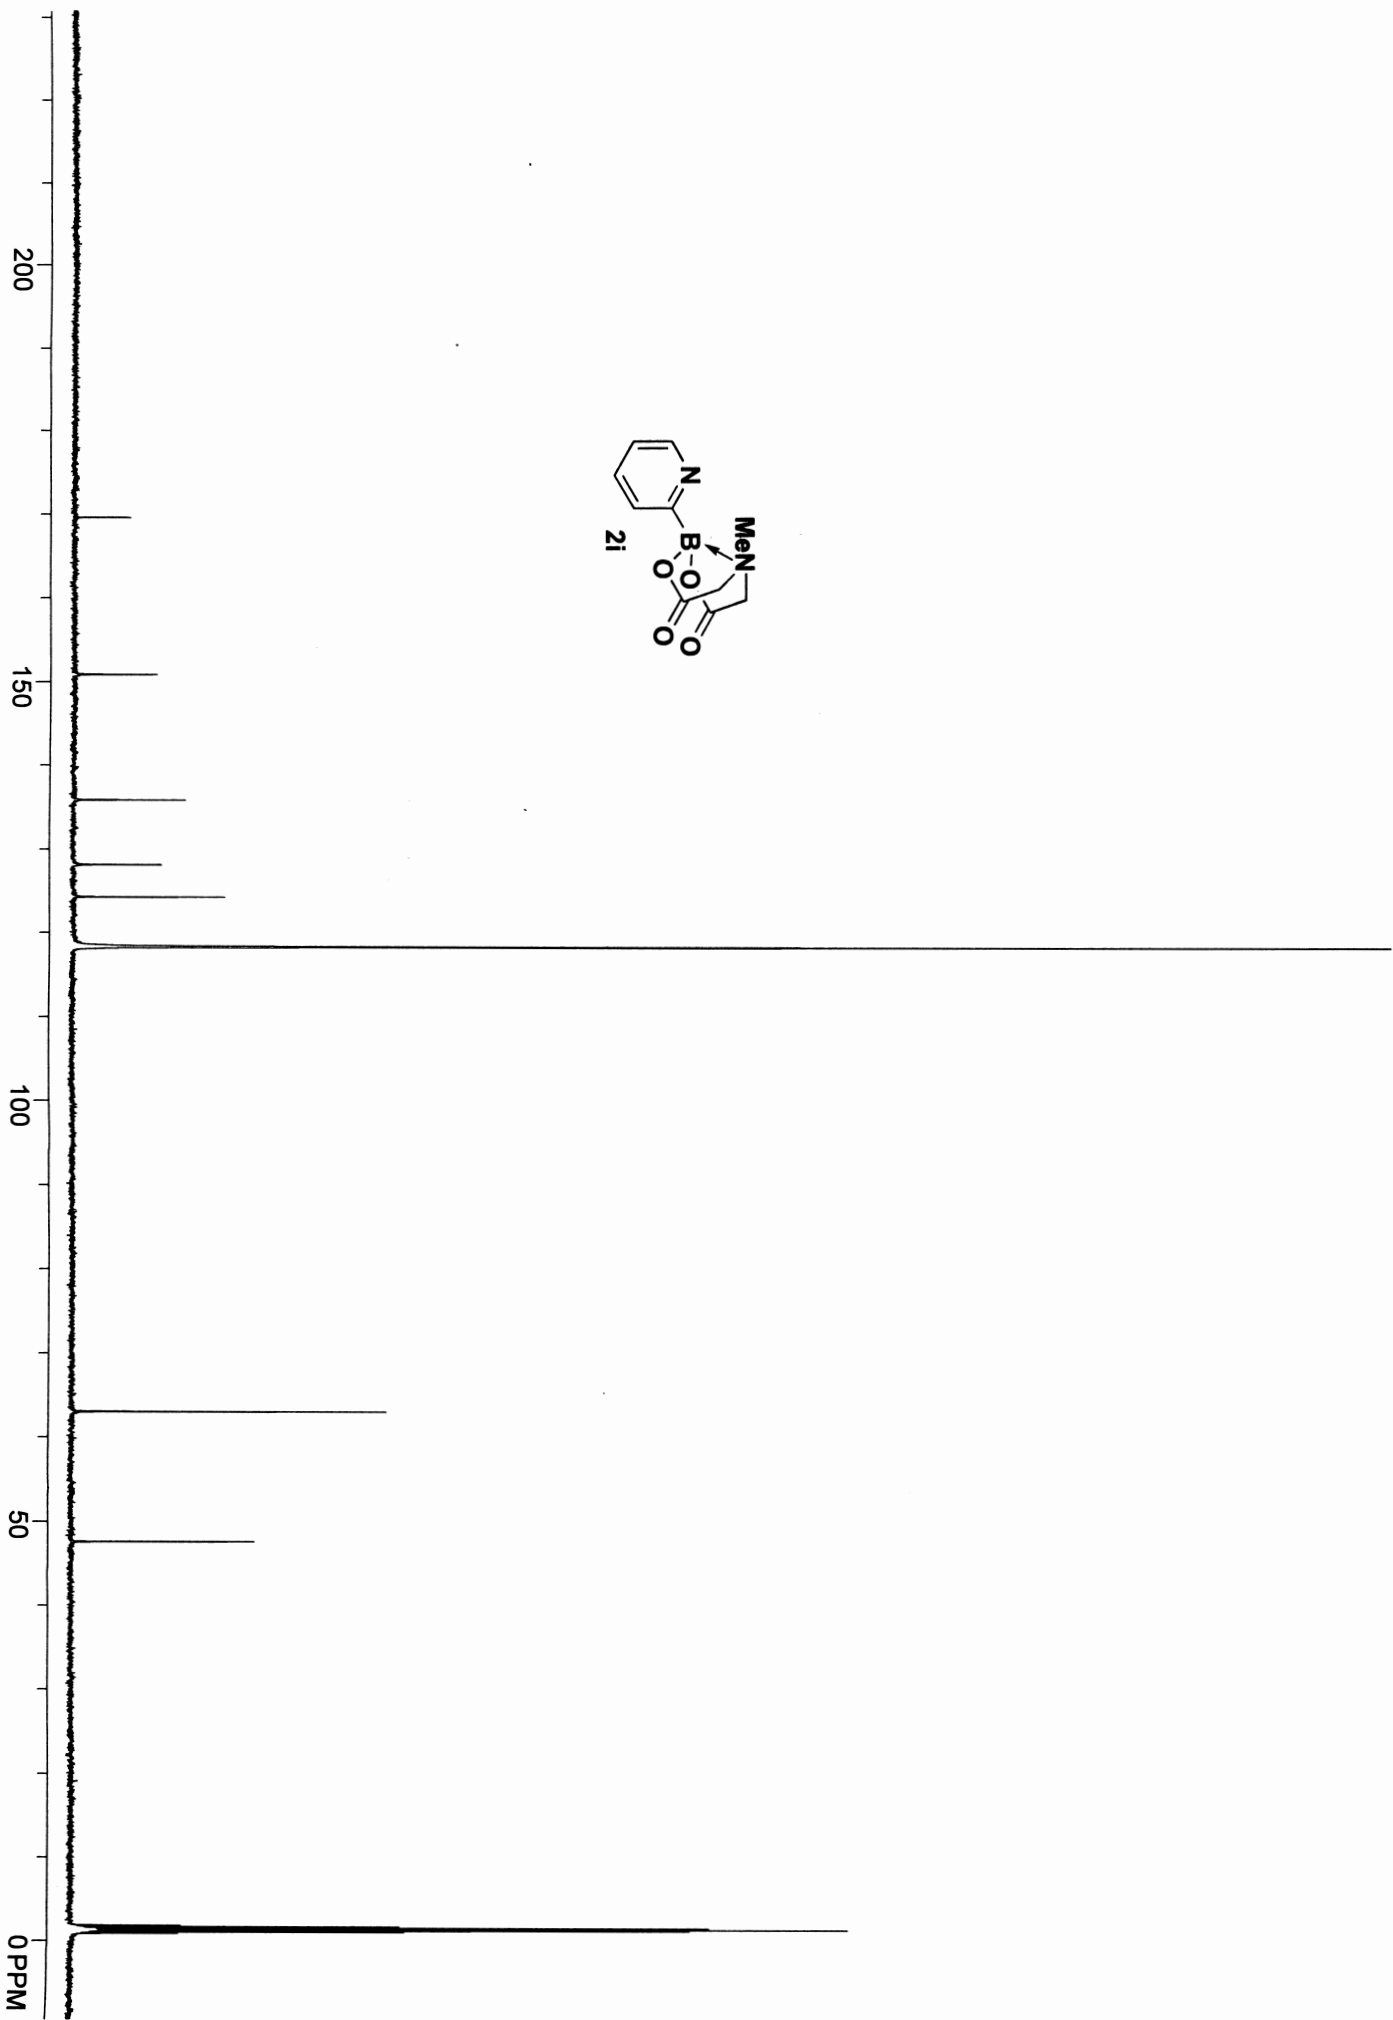



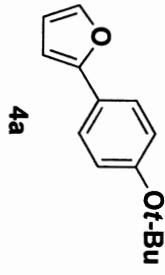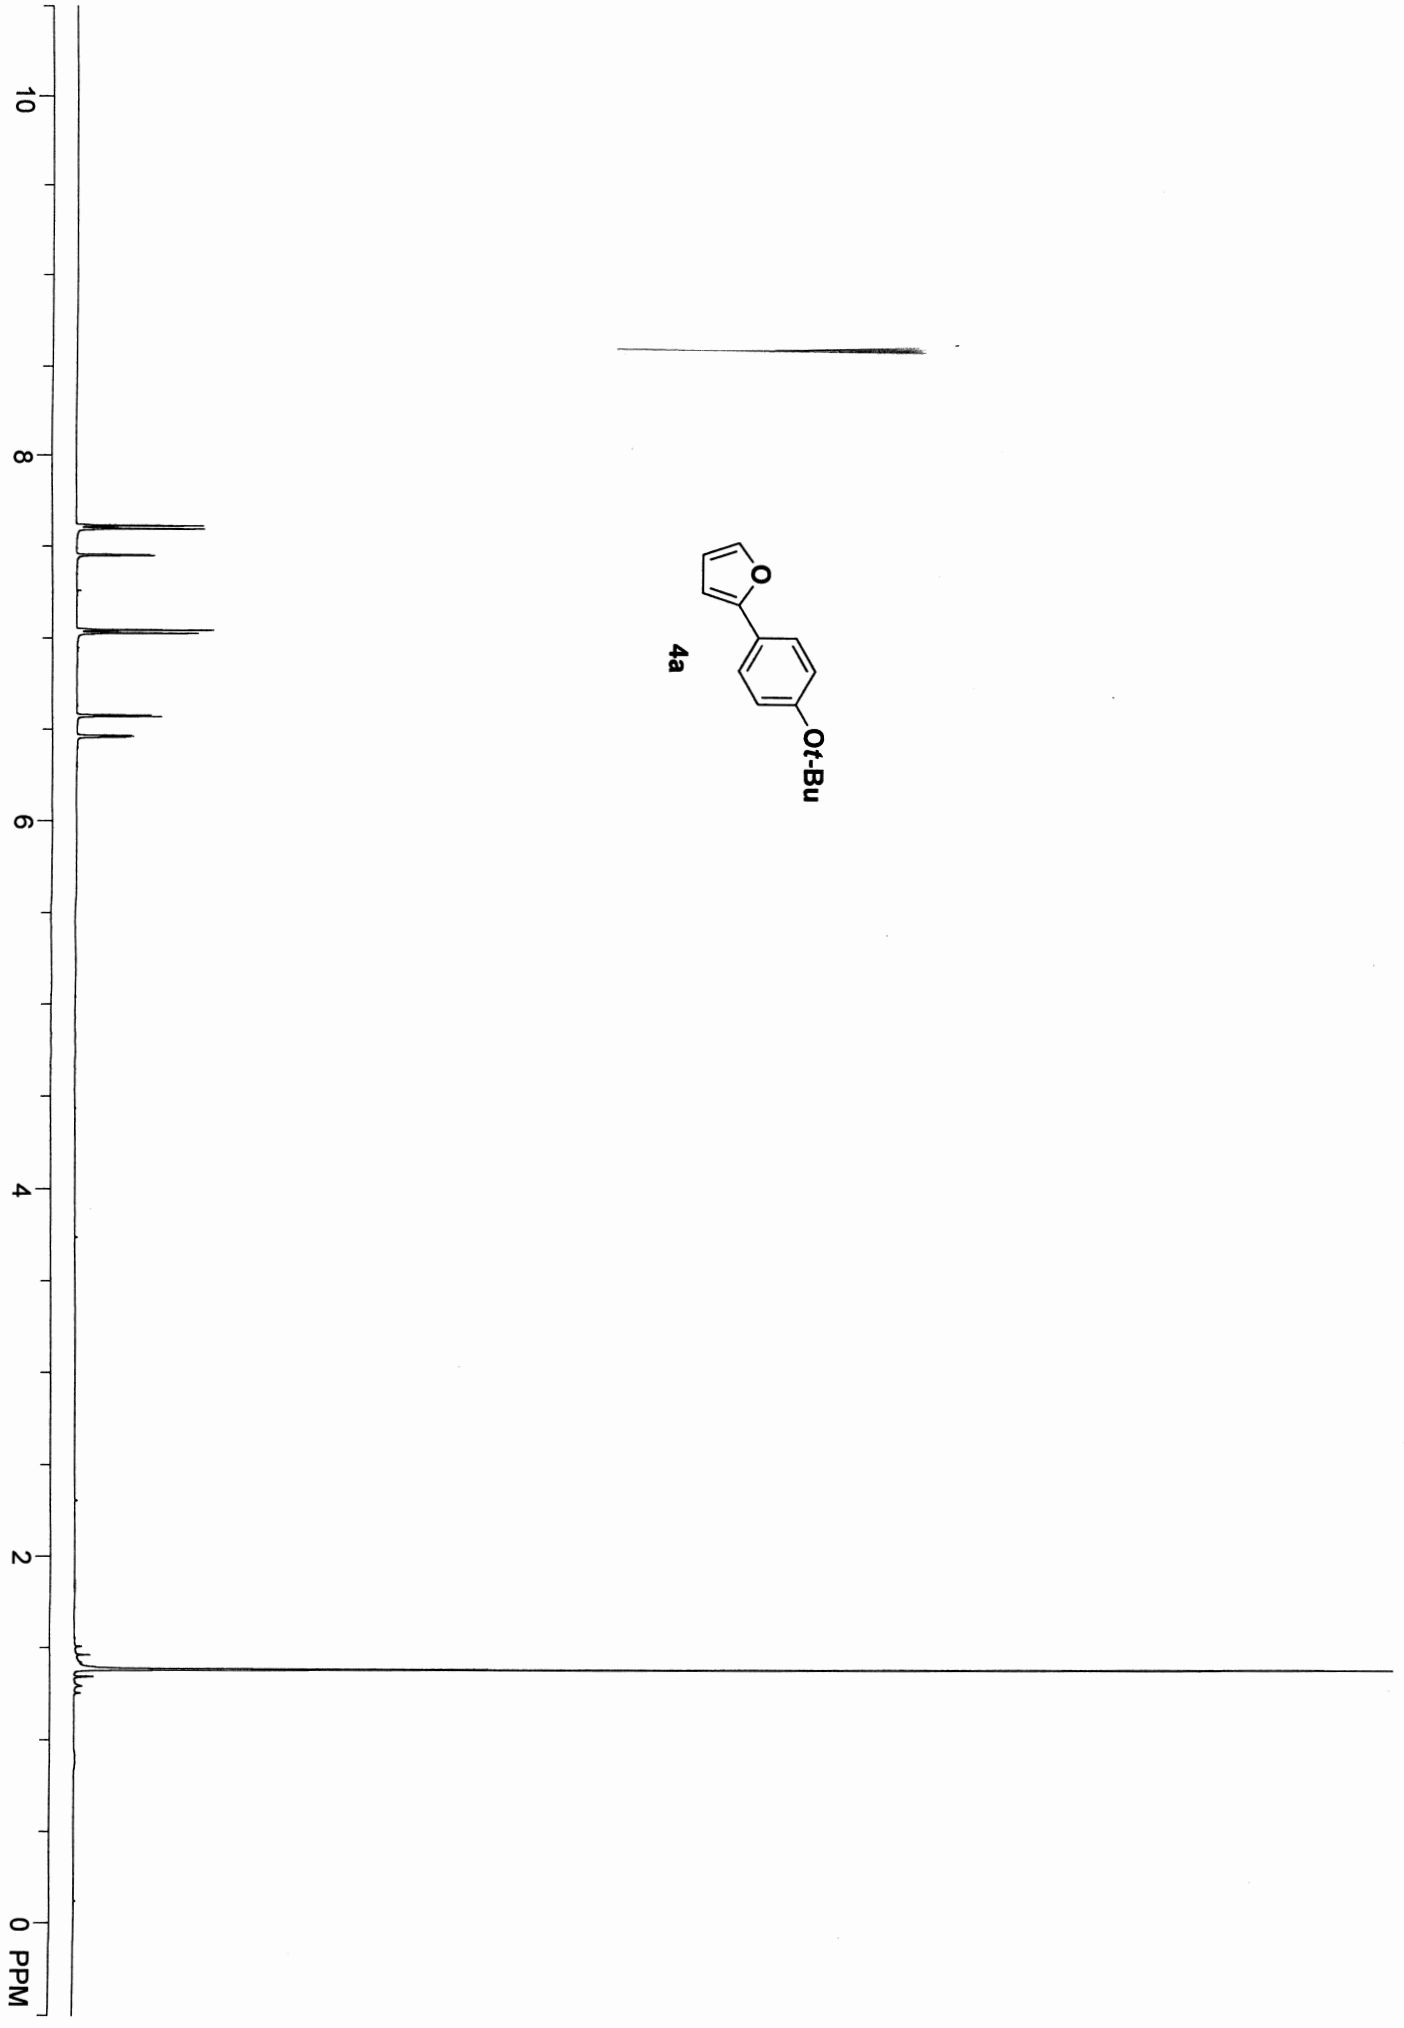

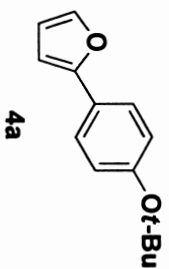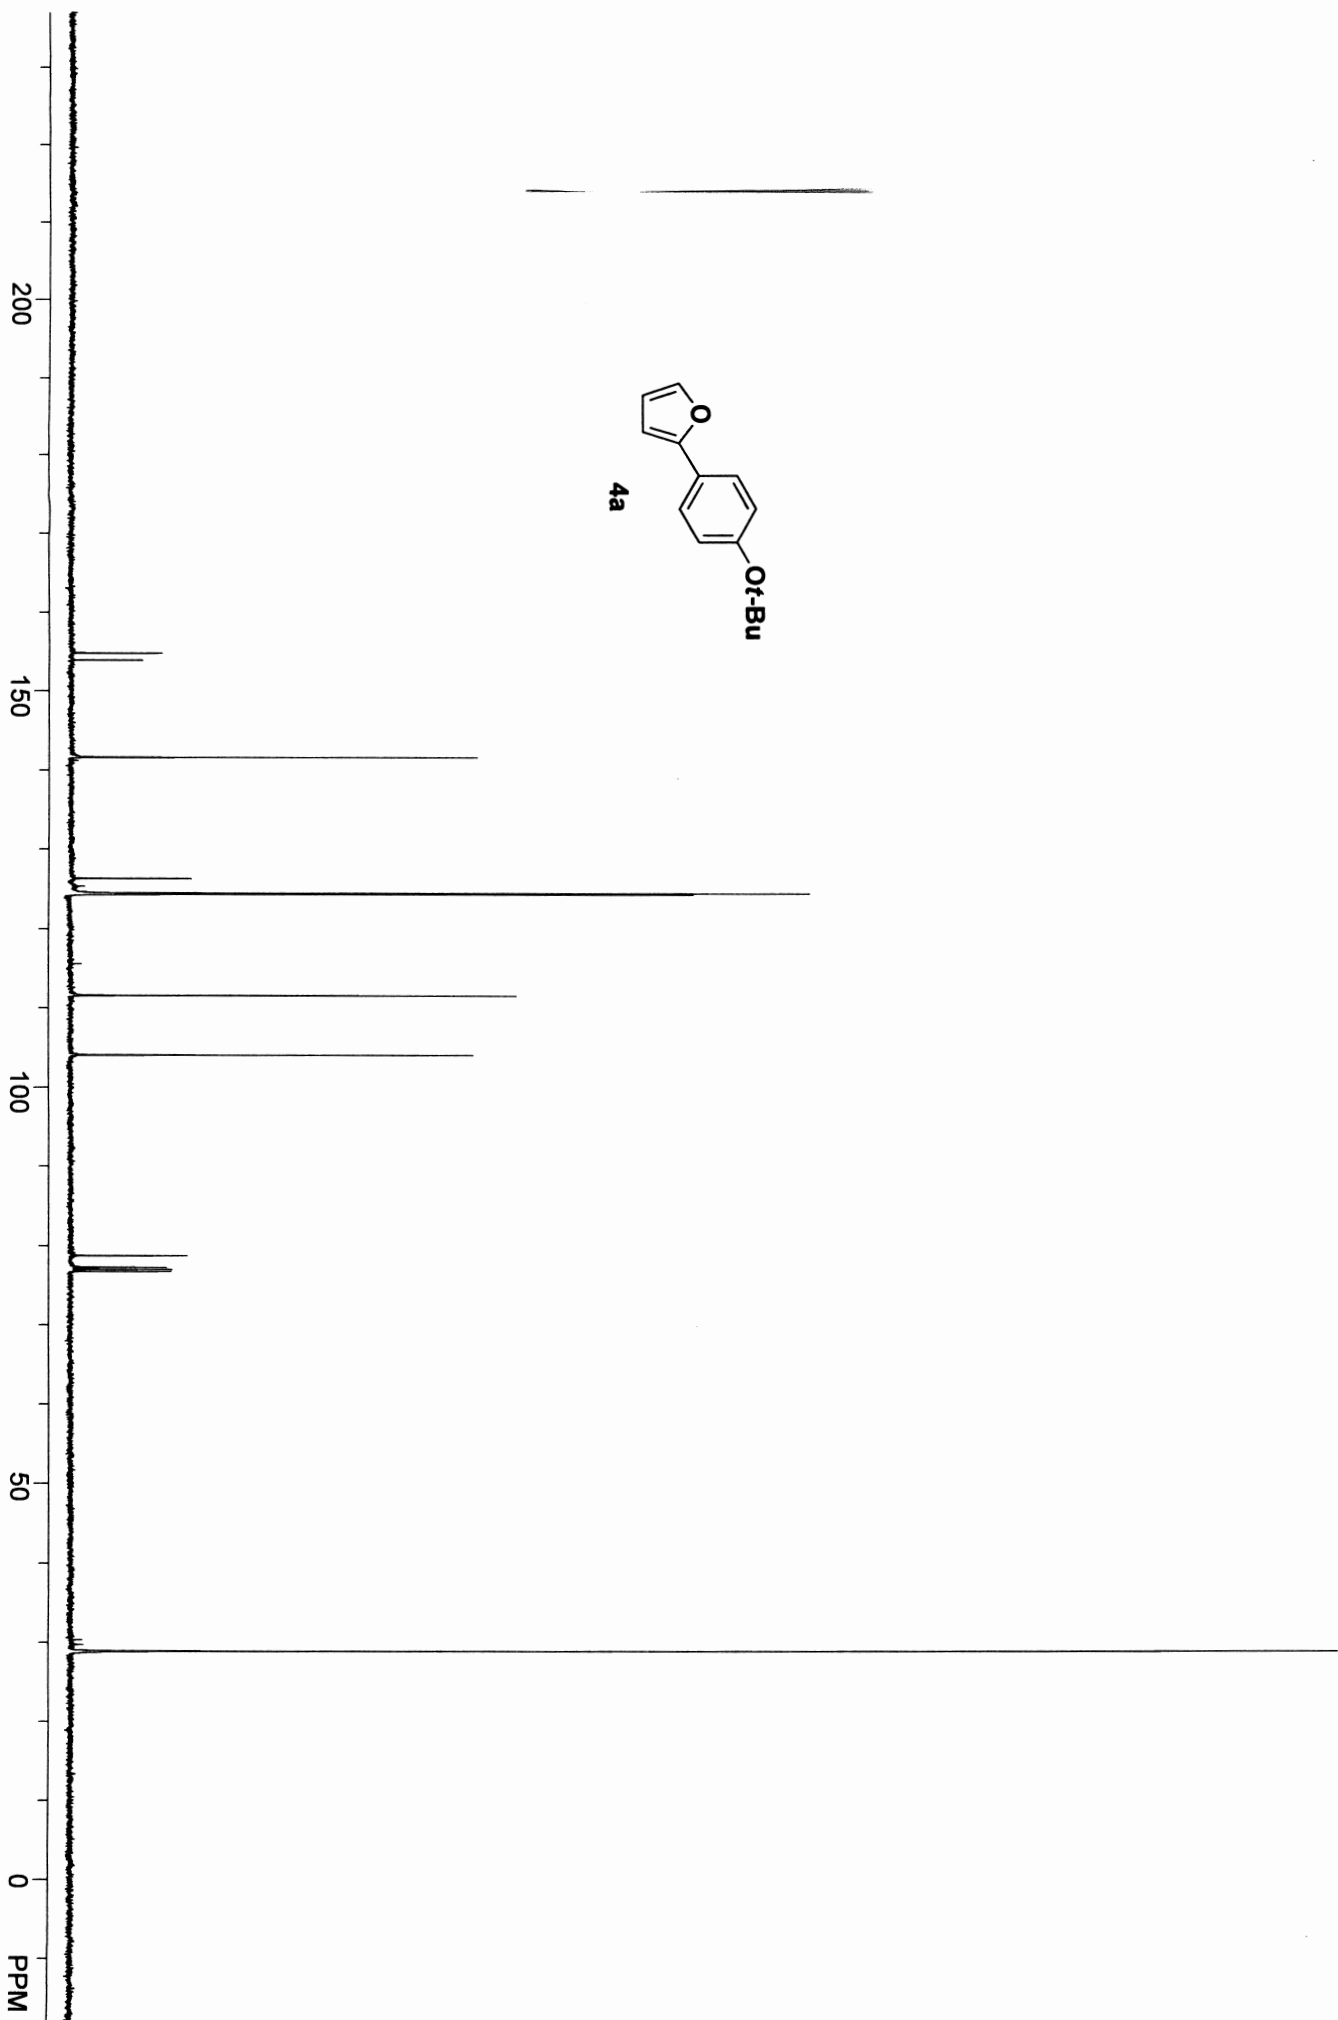

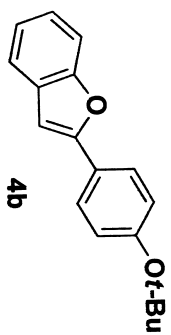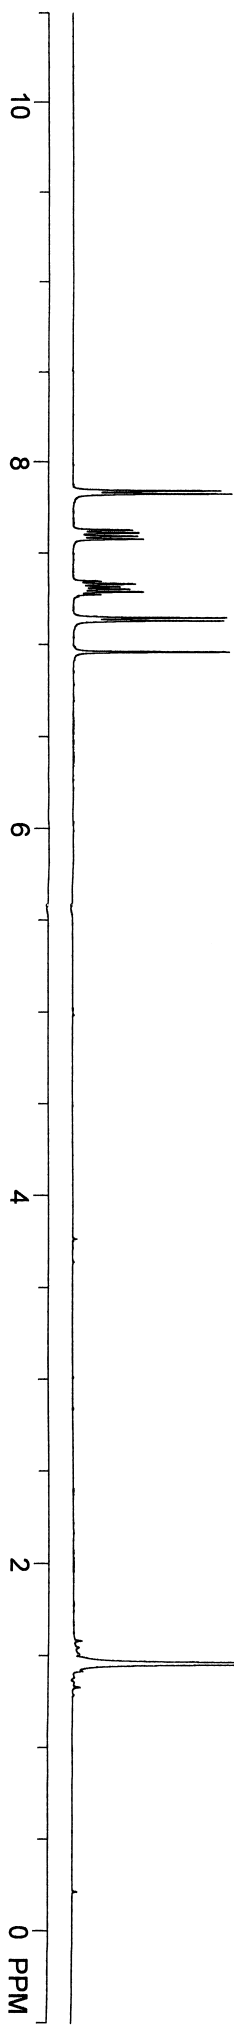

200 150 100 50 0 PPM

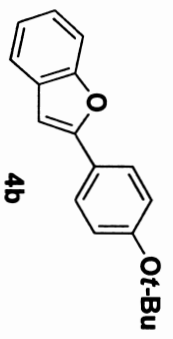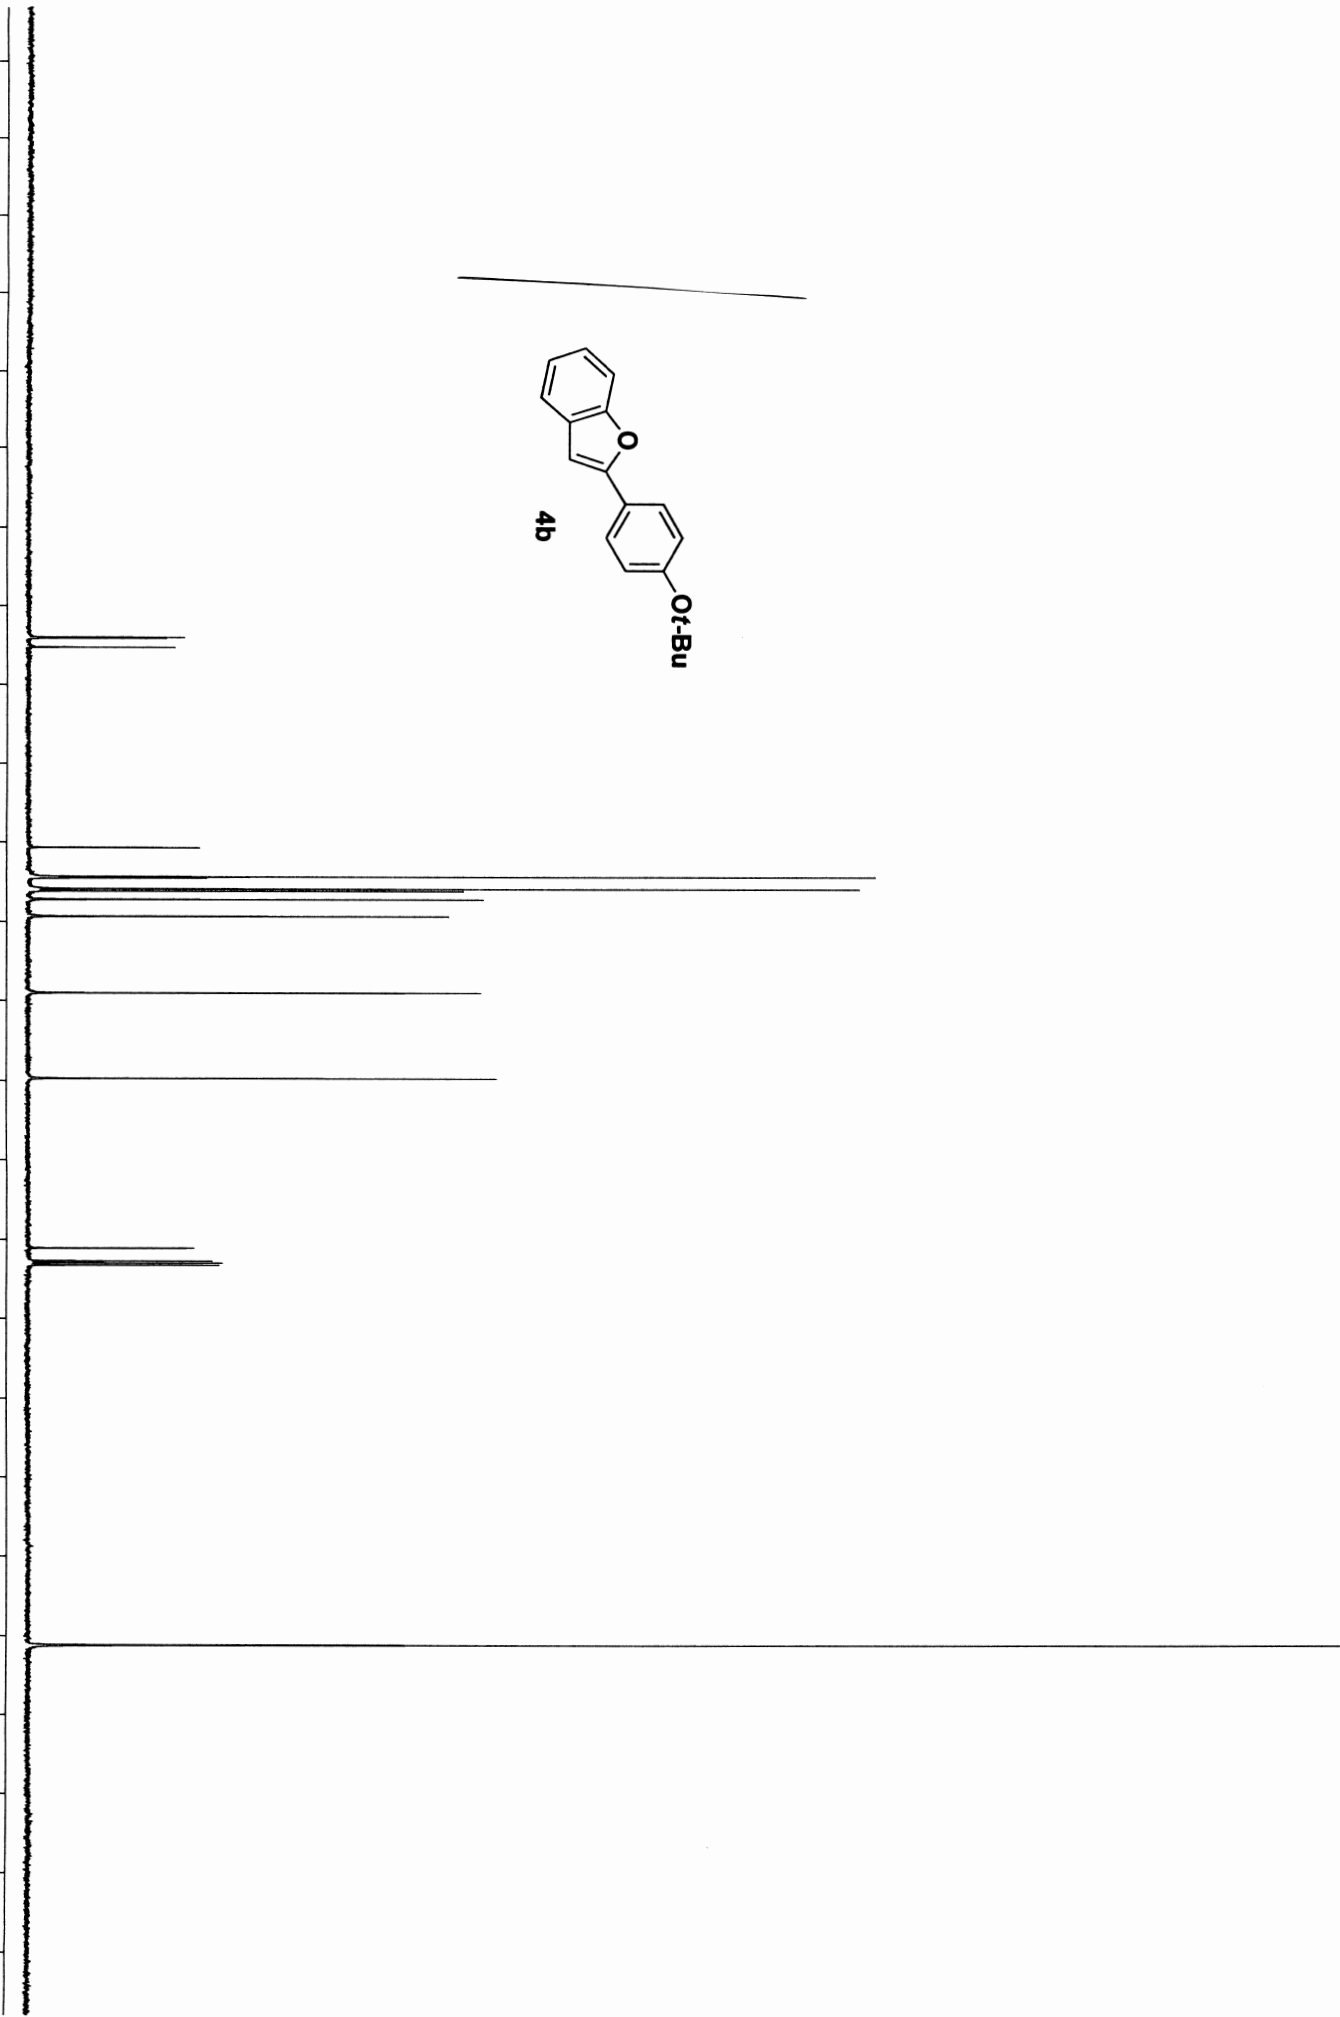

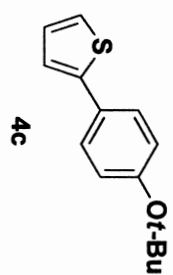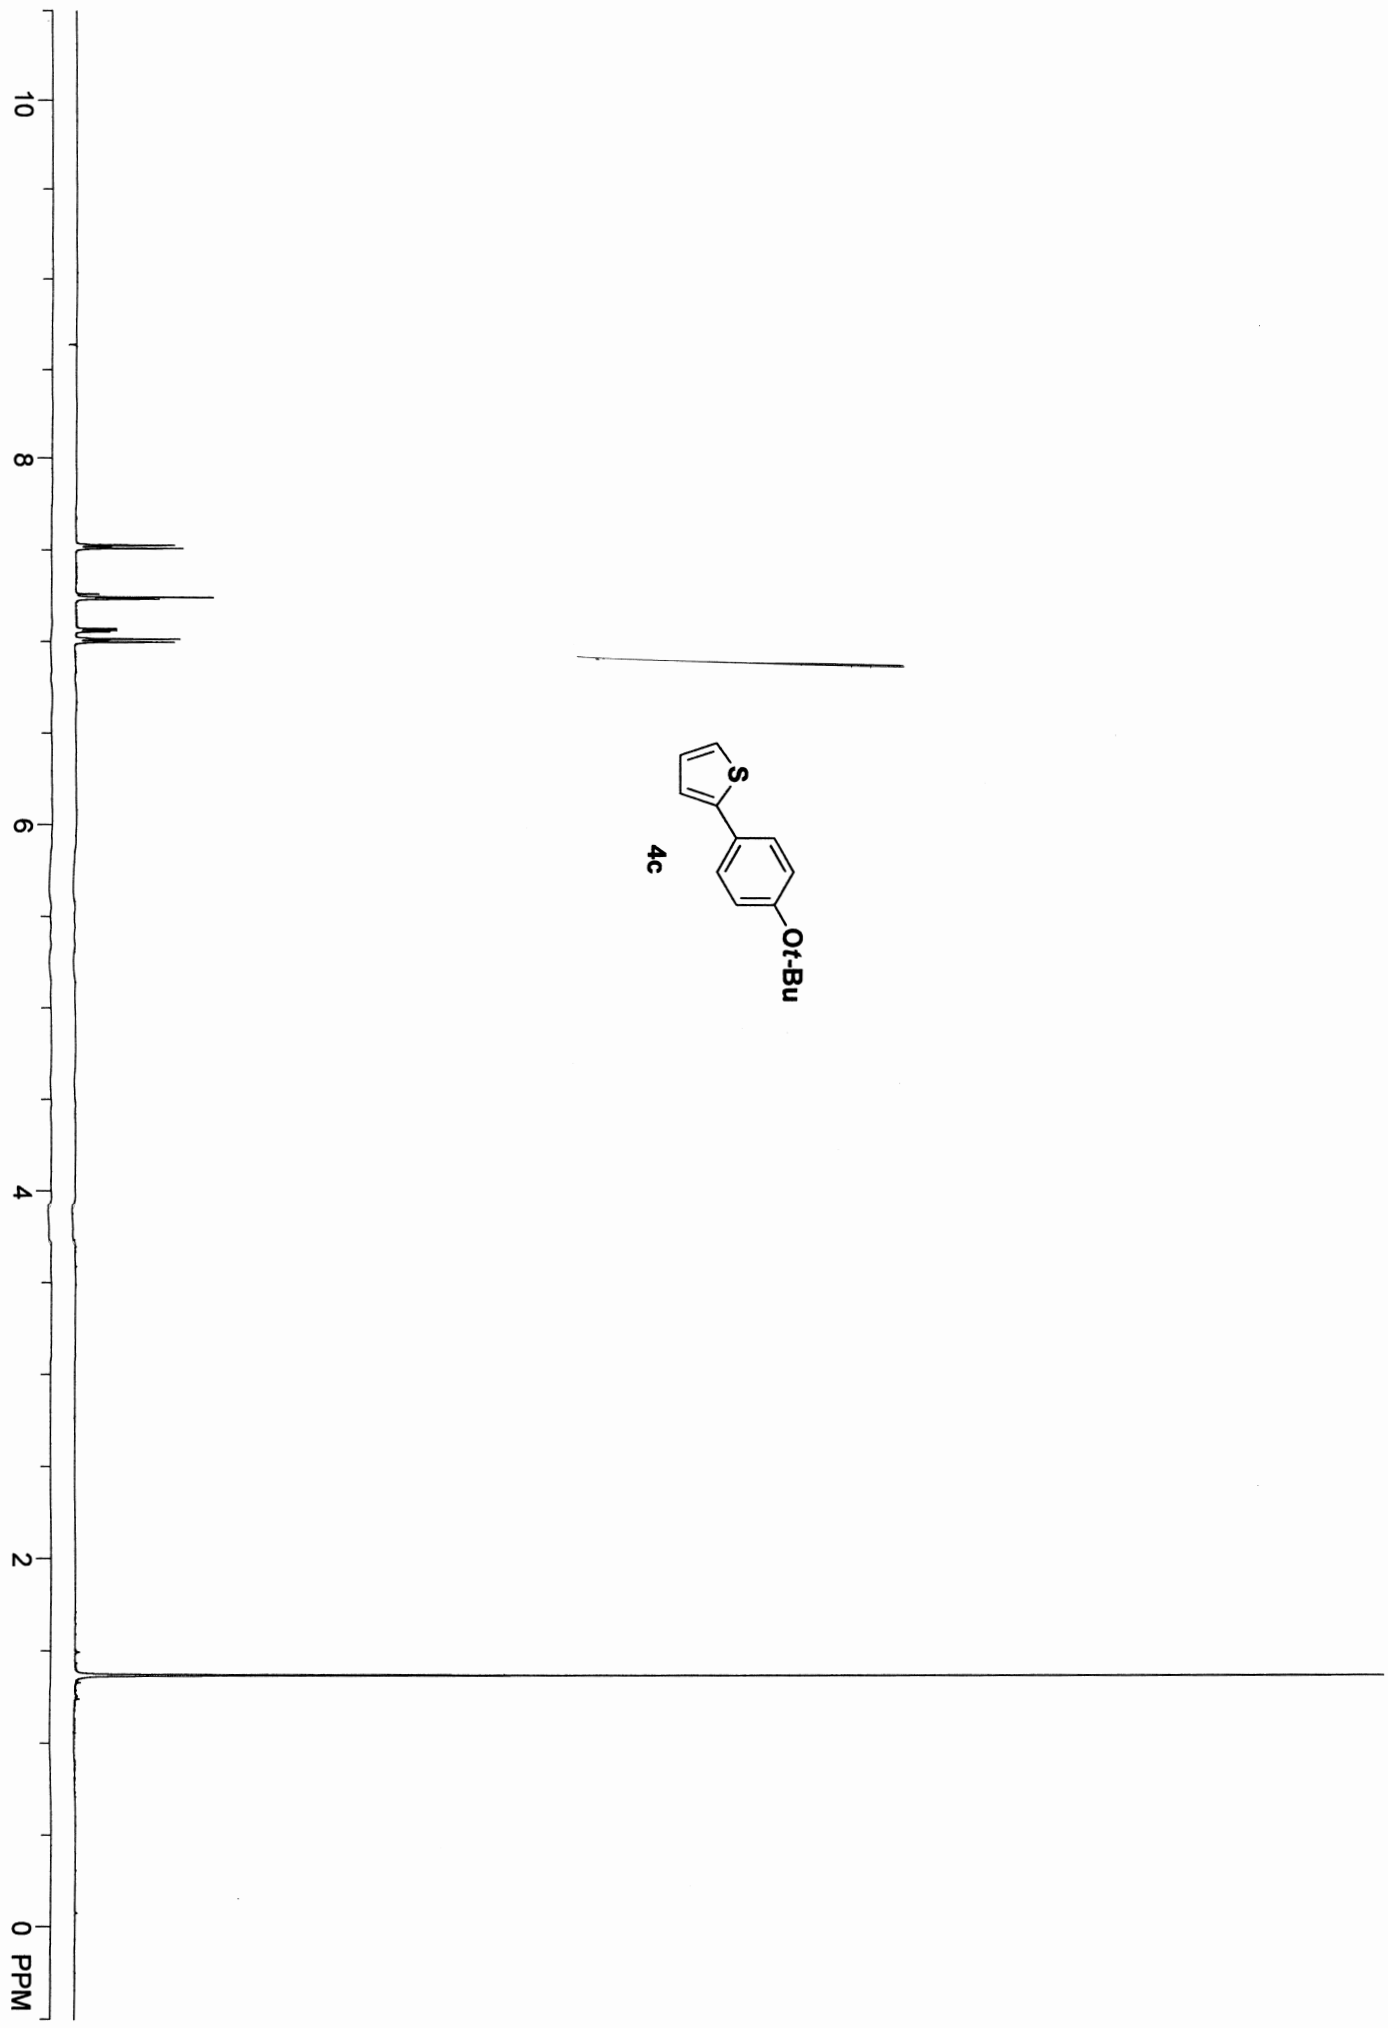

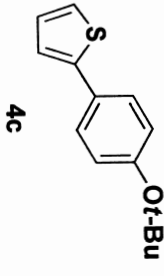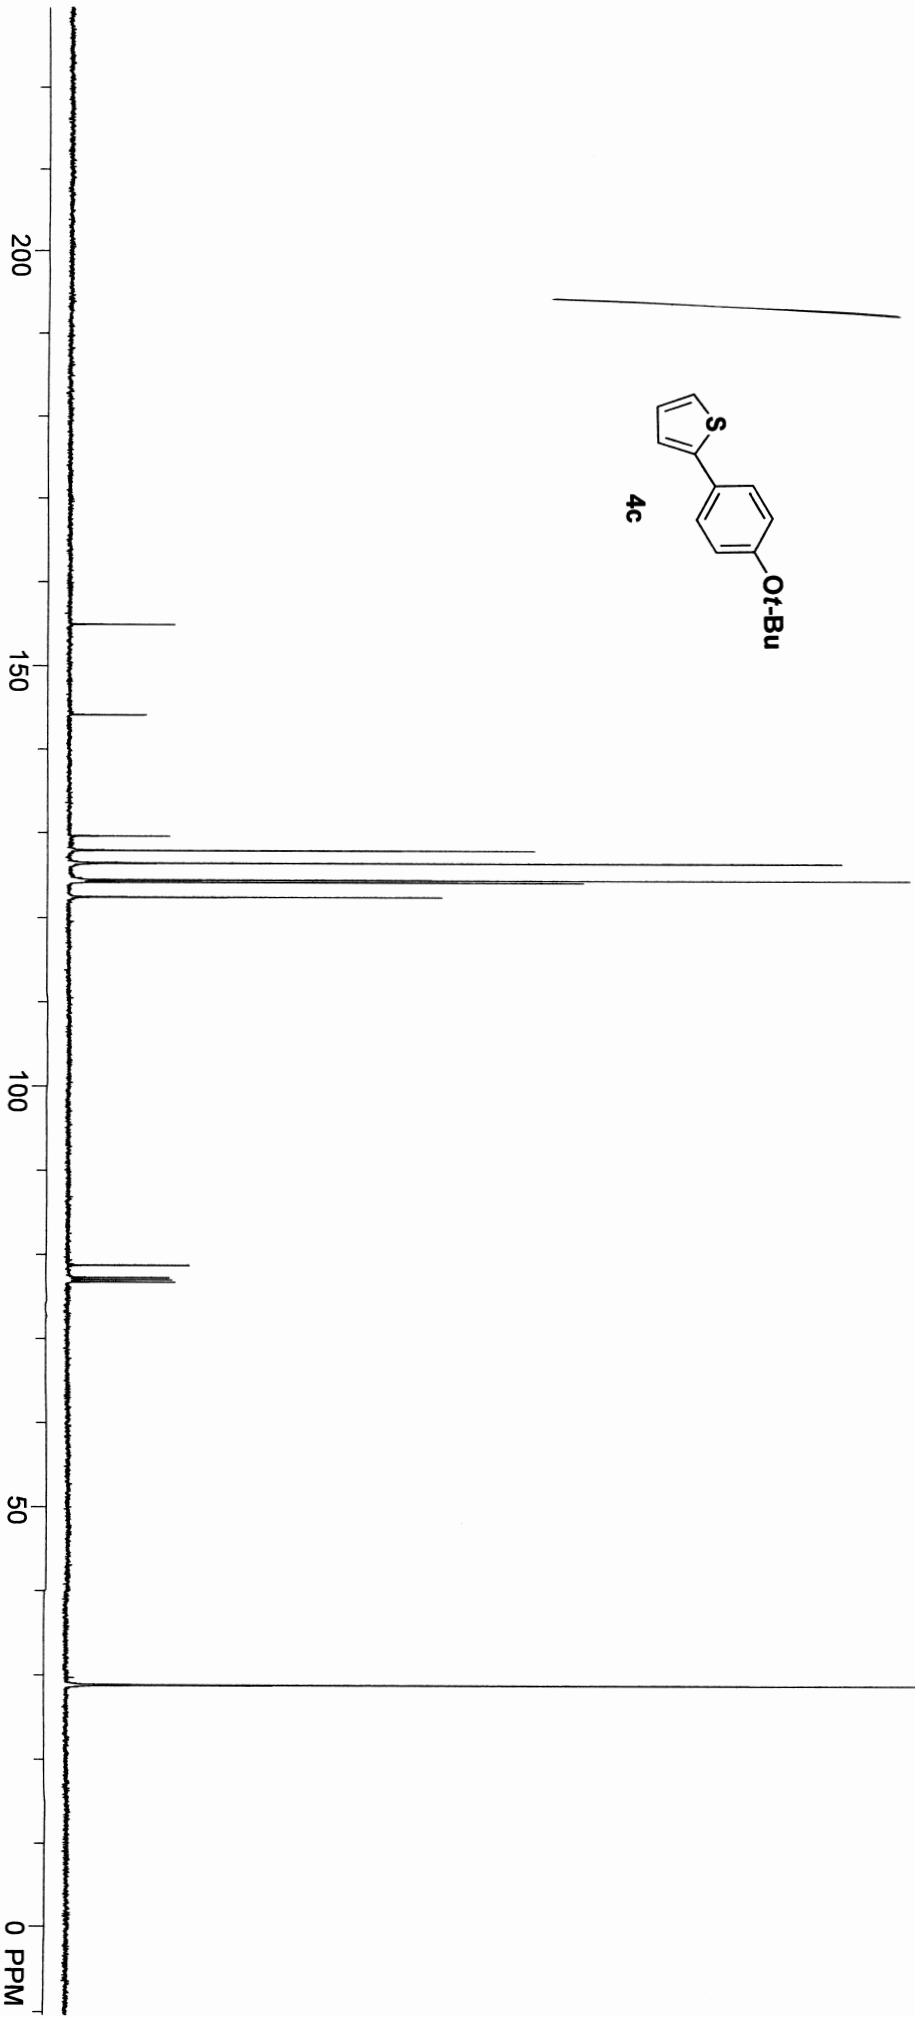

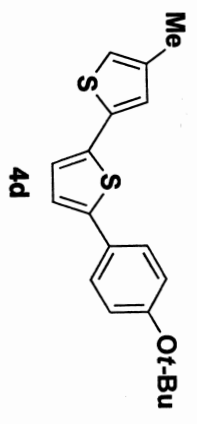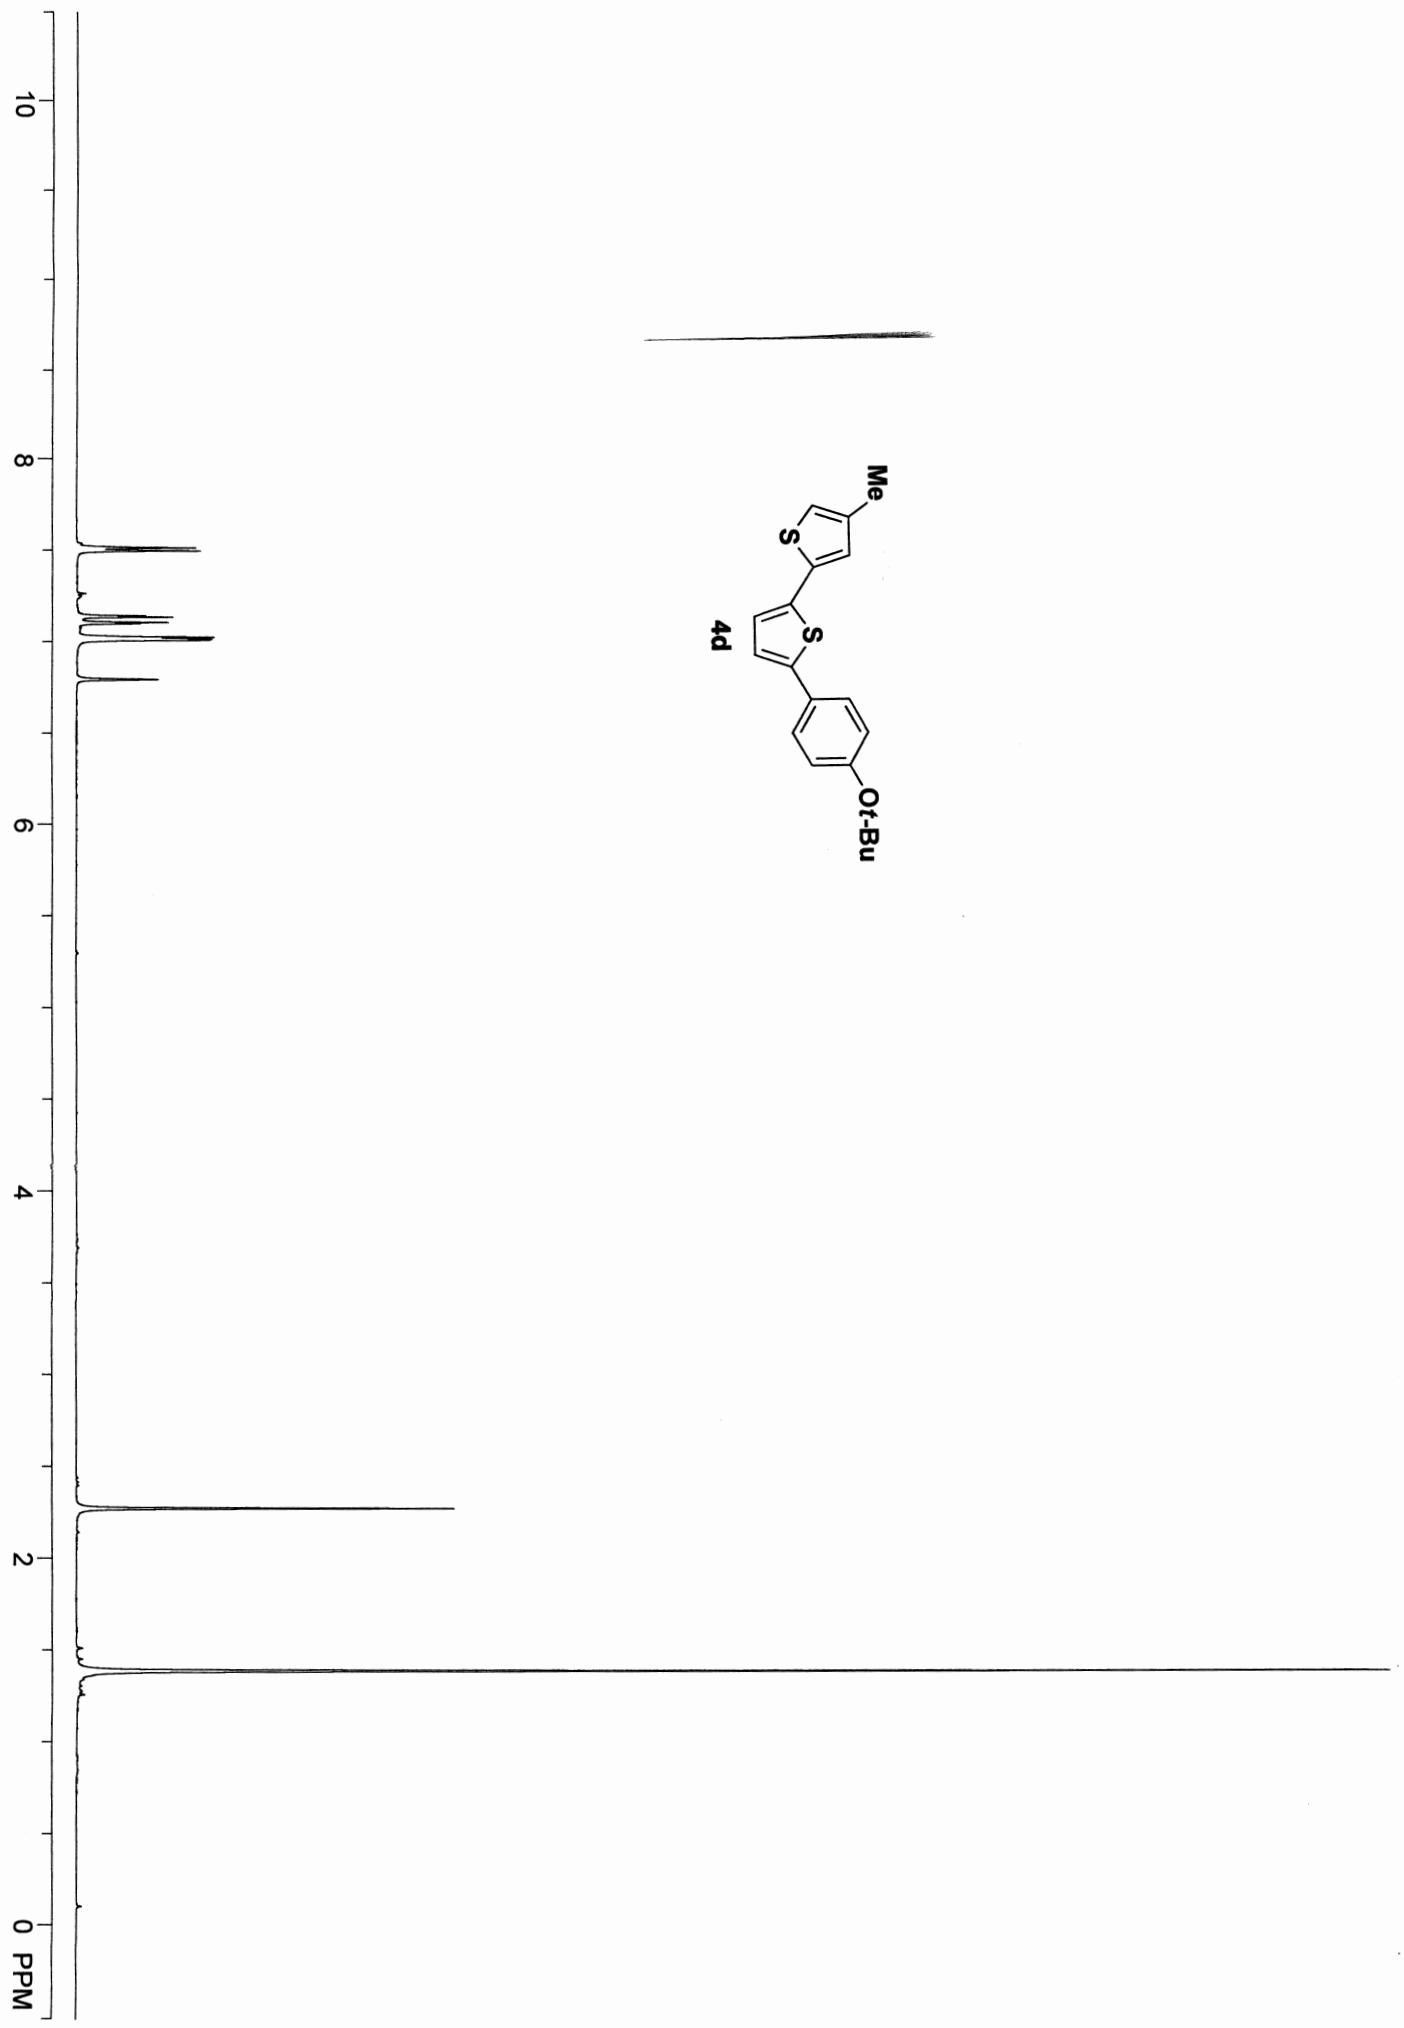

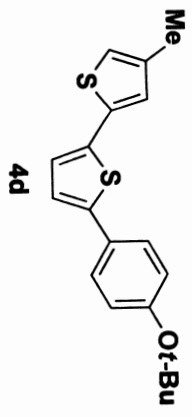

200  
150  
100  
50  
0 PPM

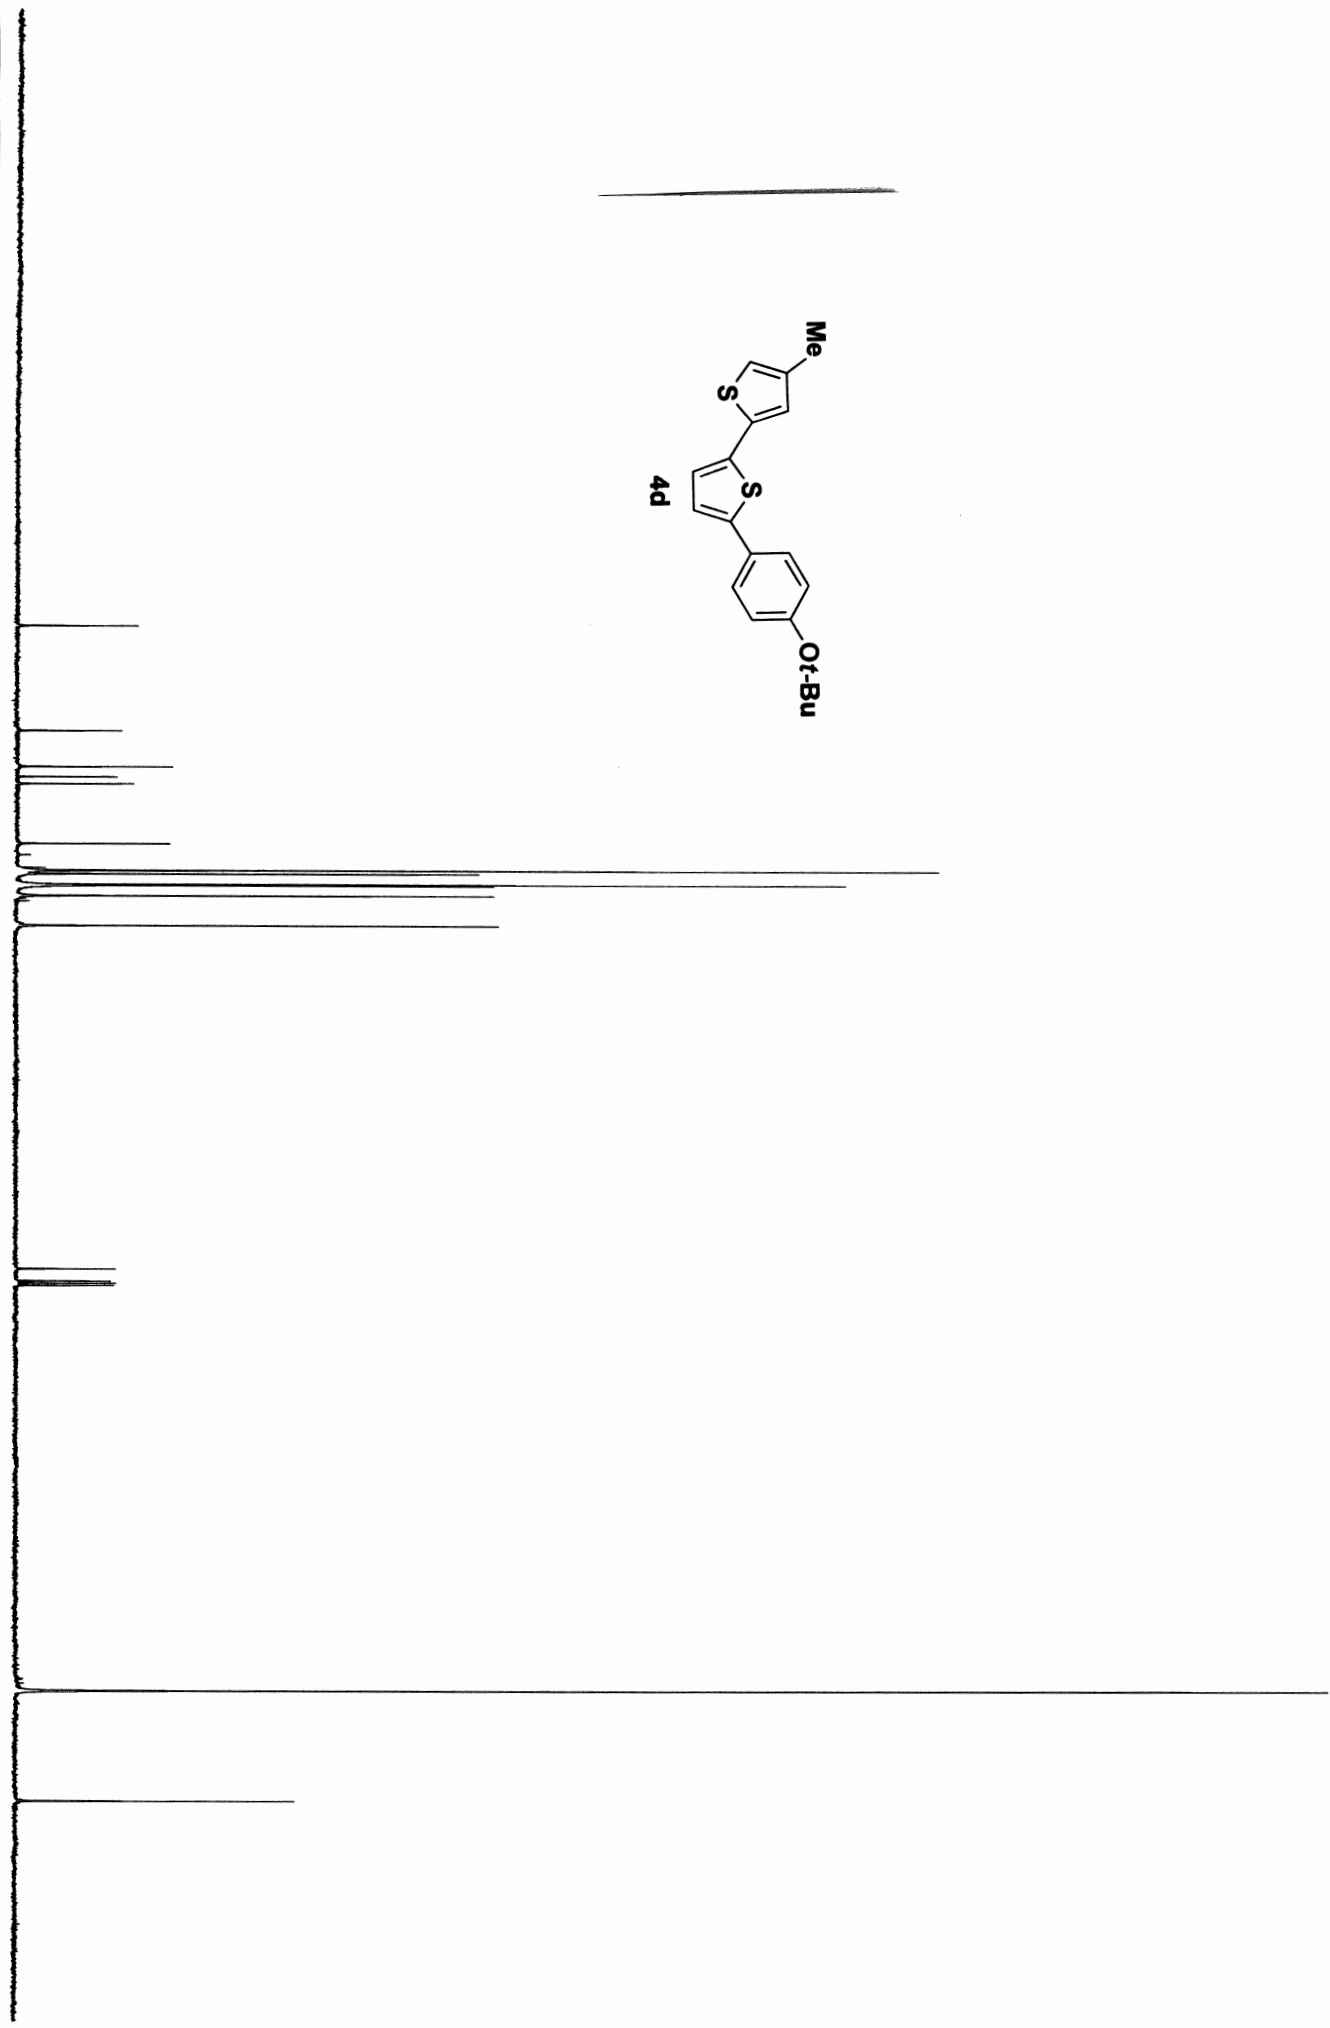



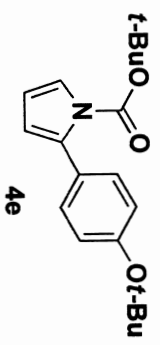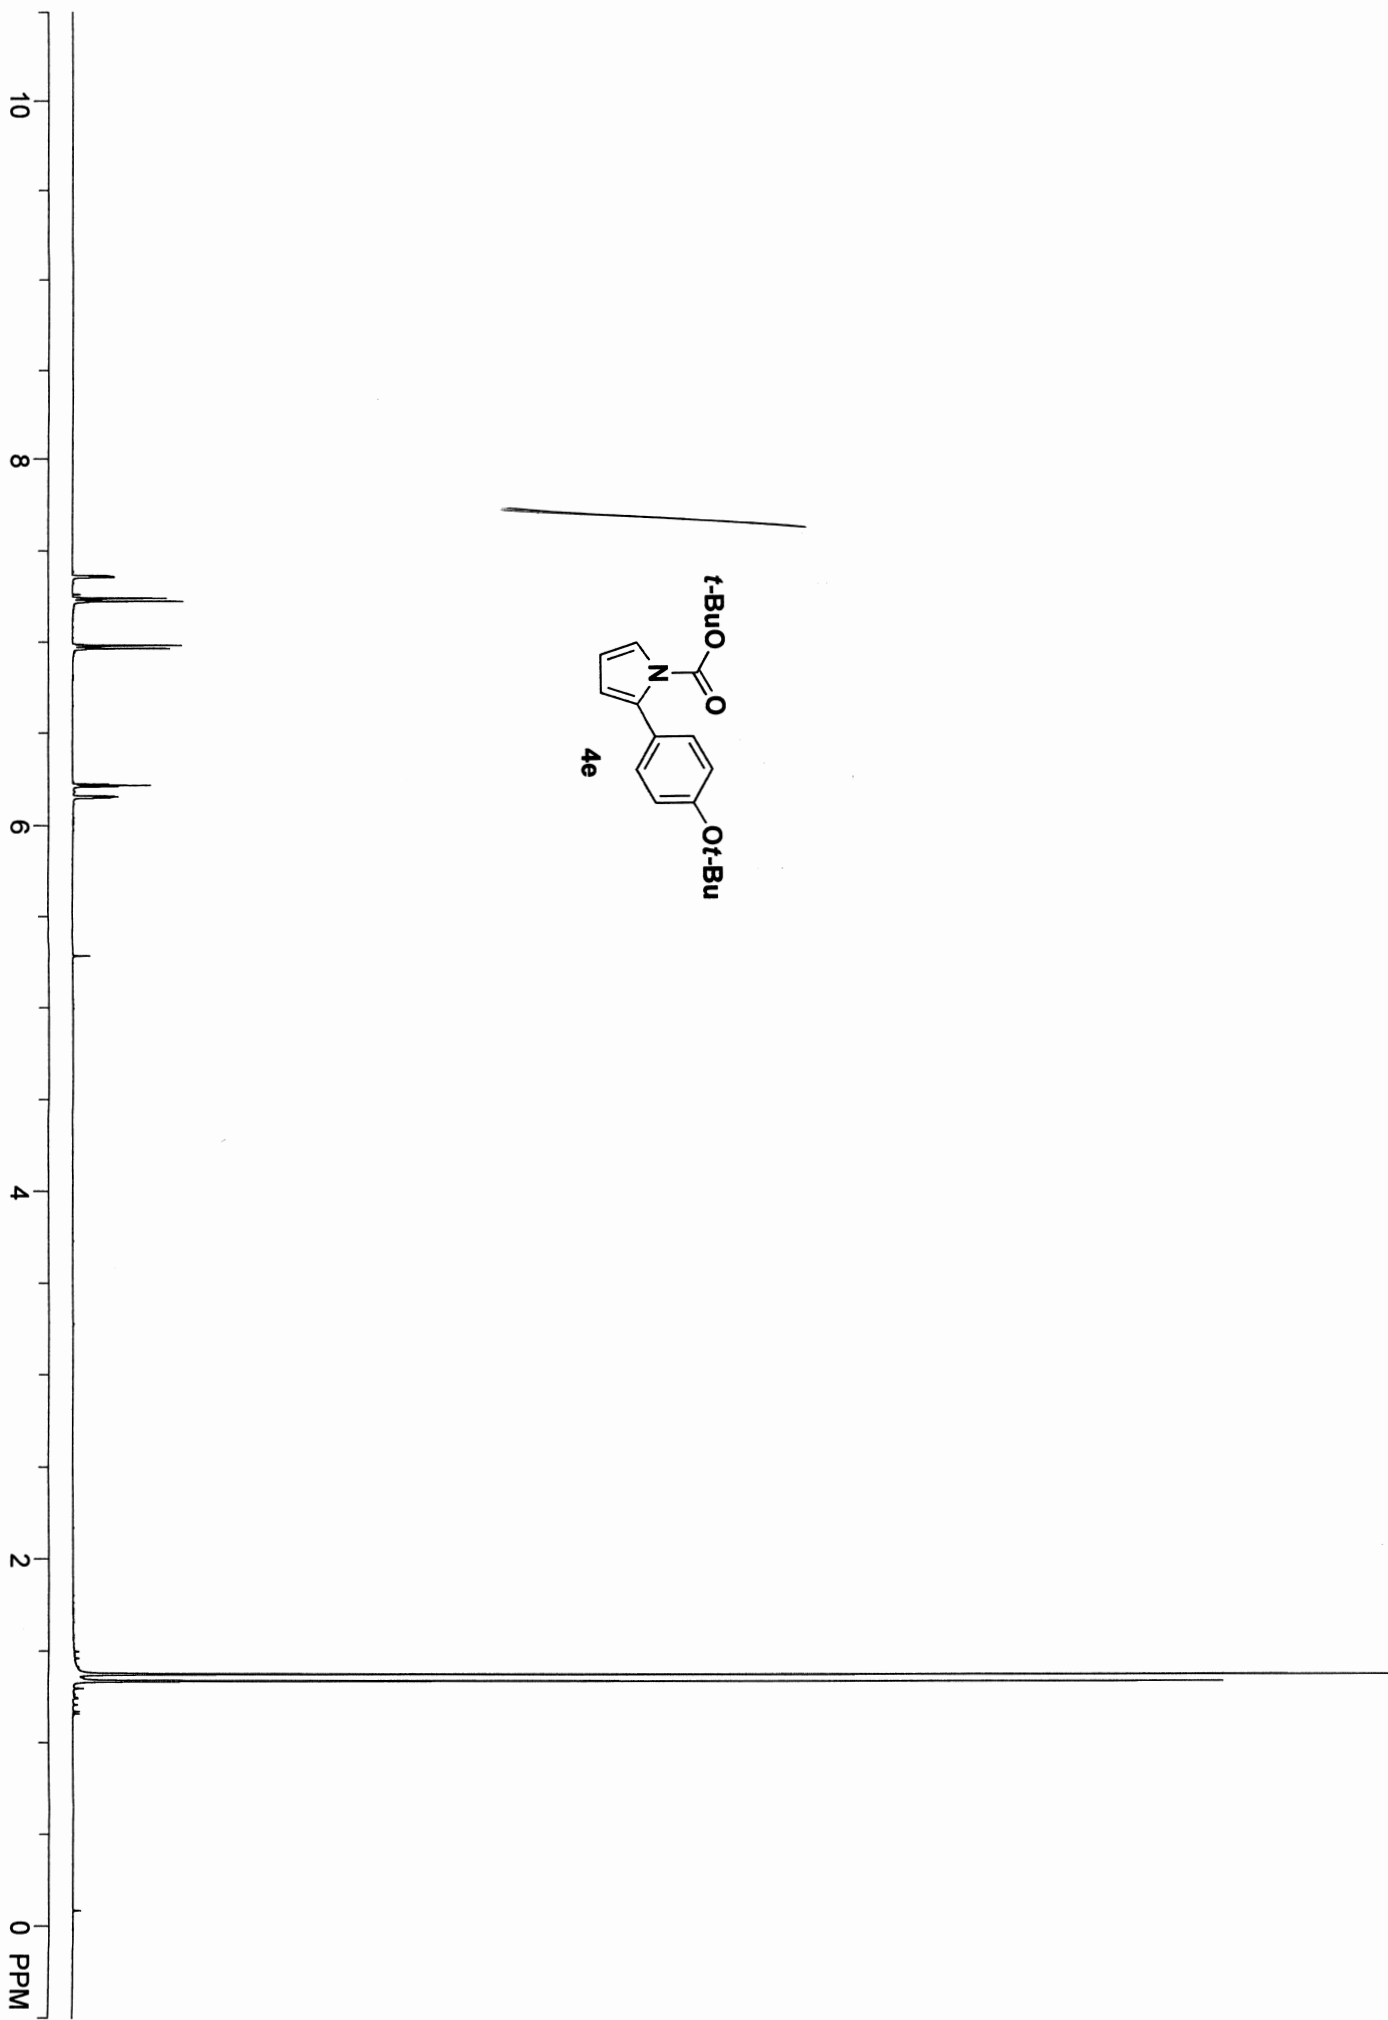

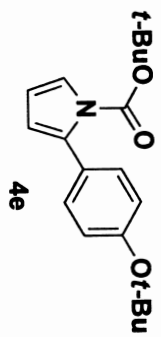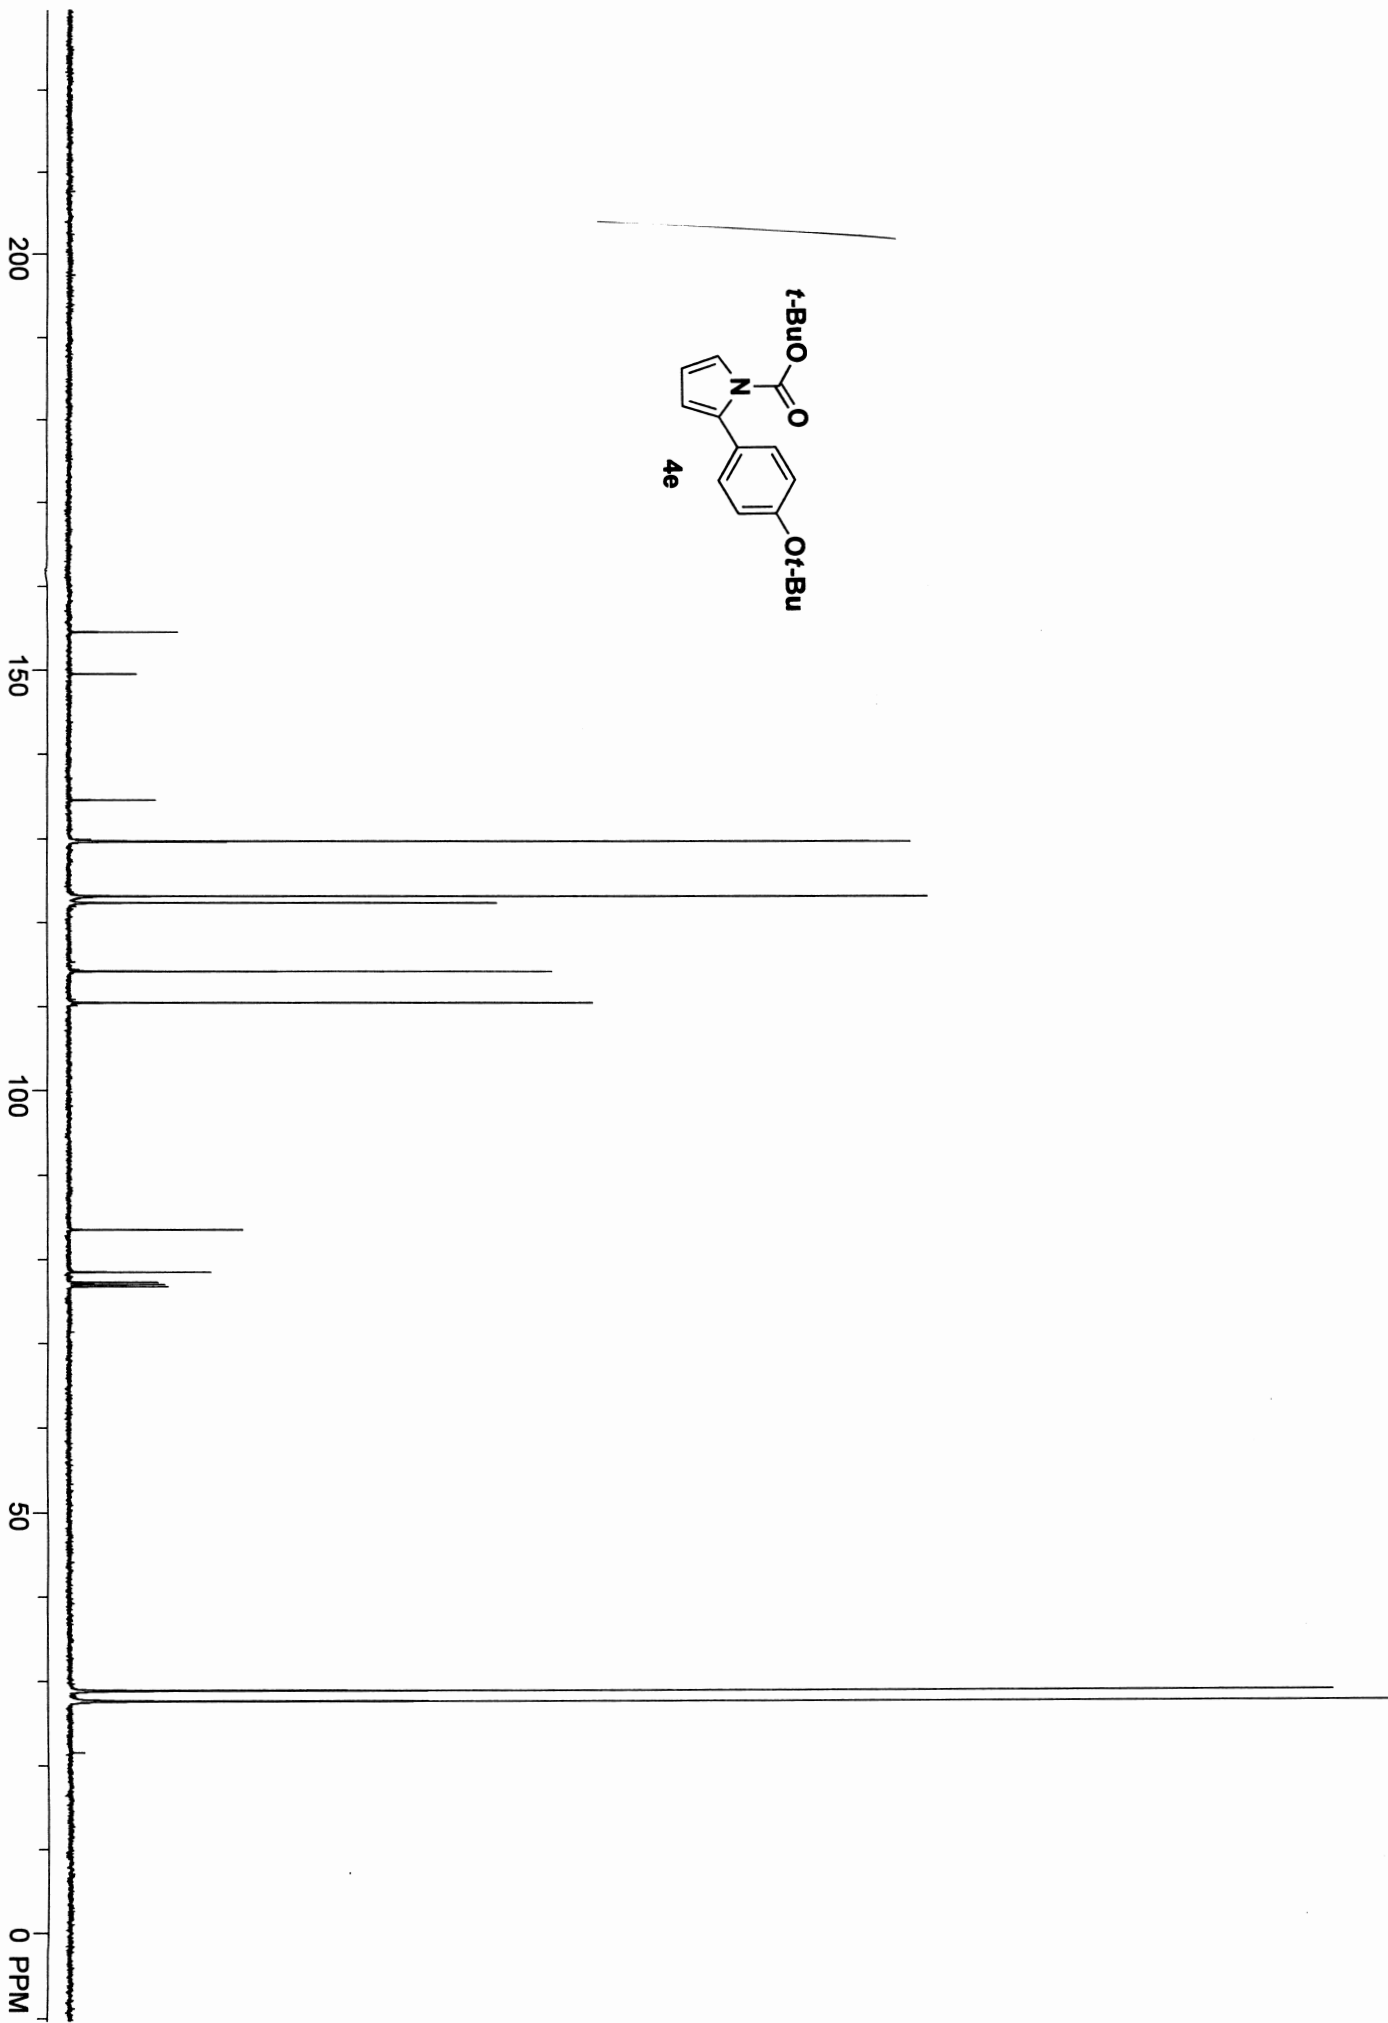

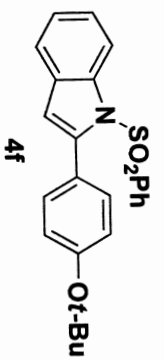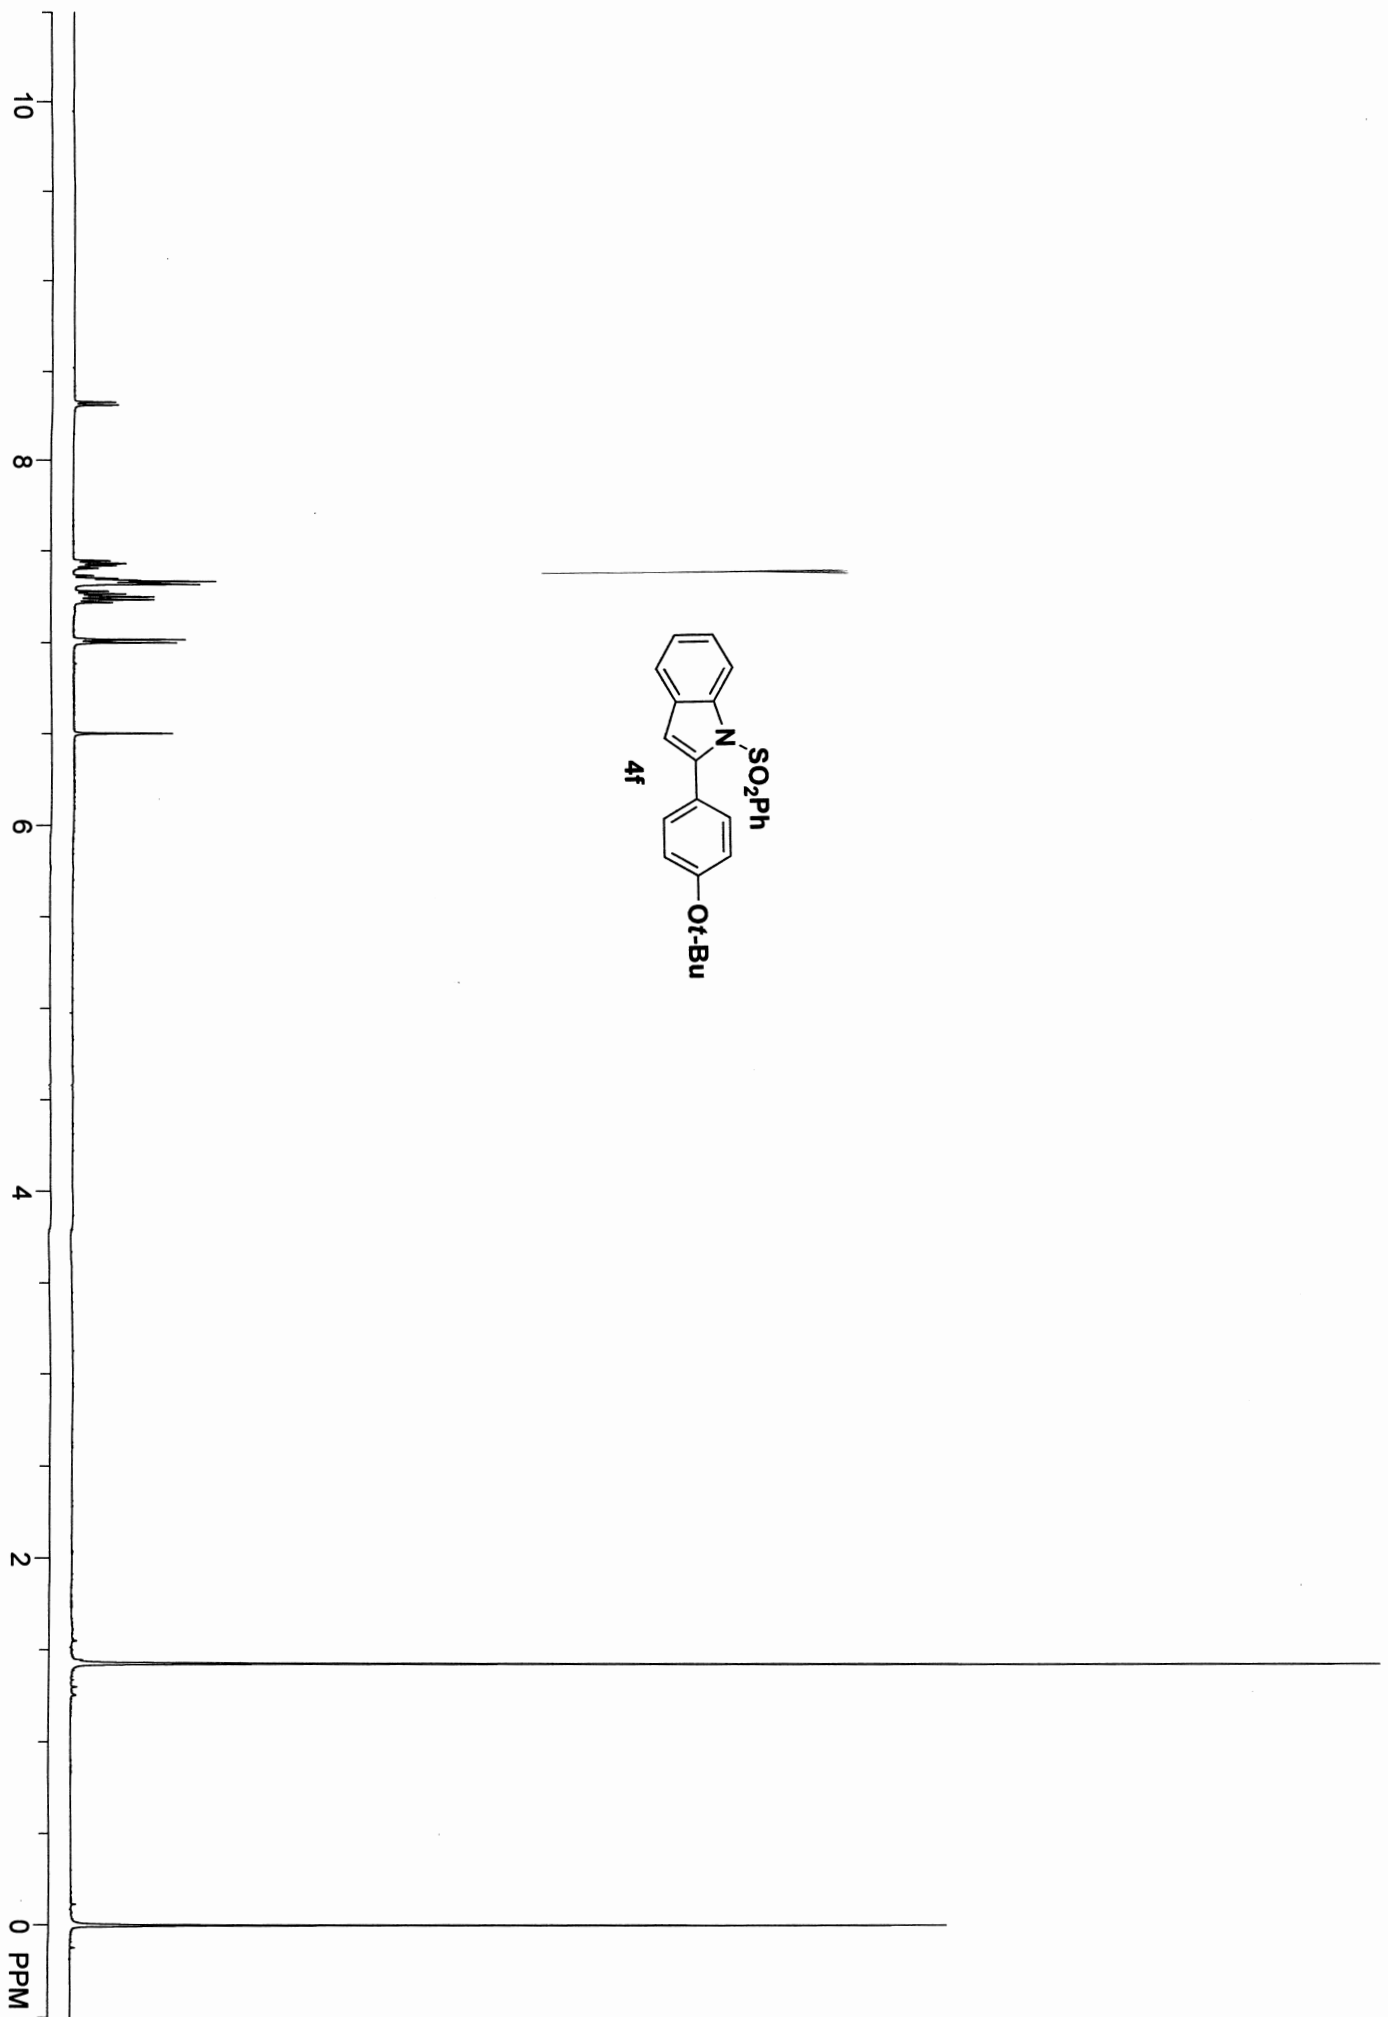

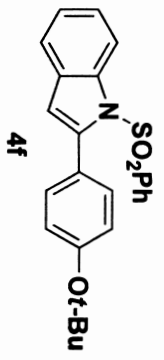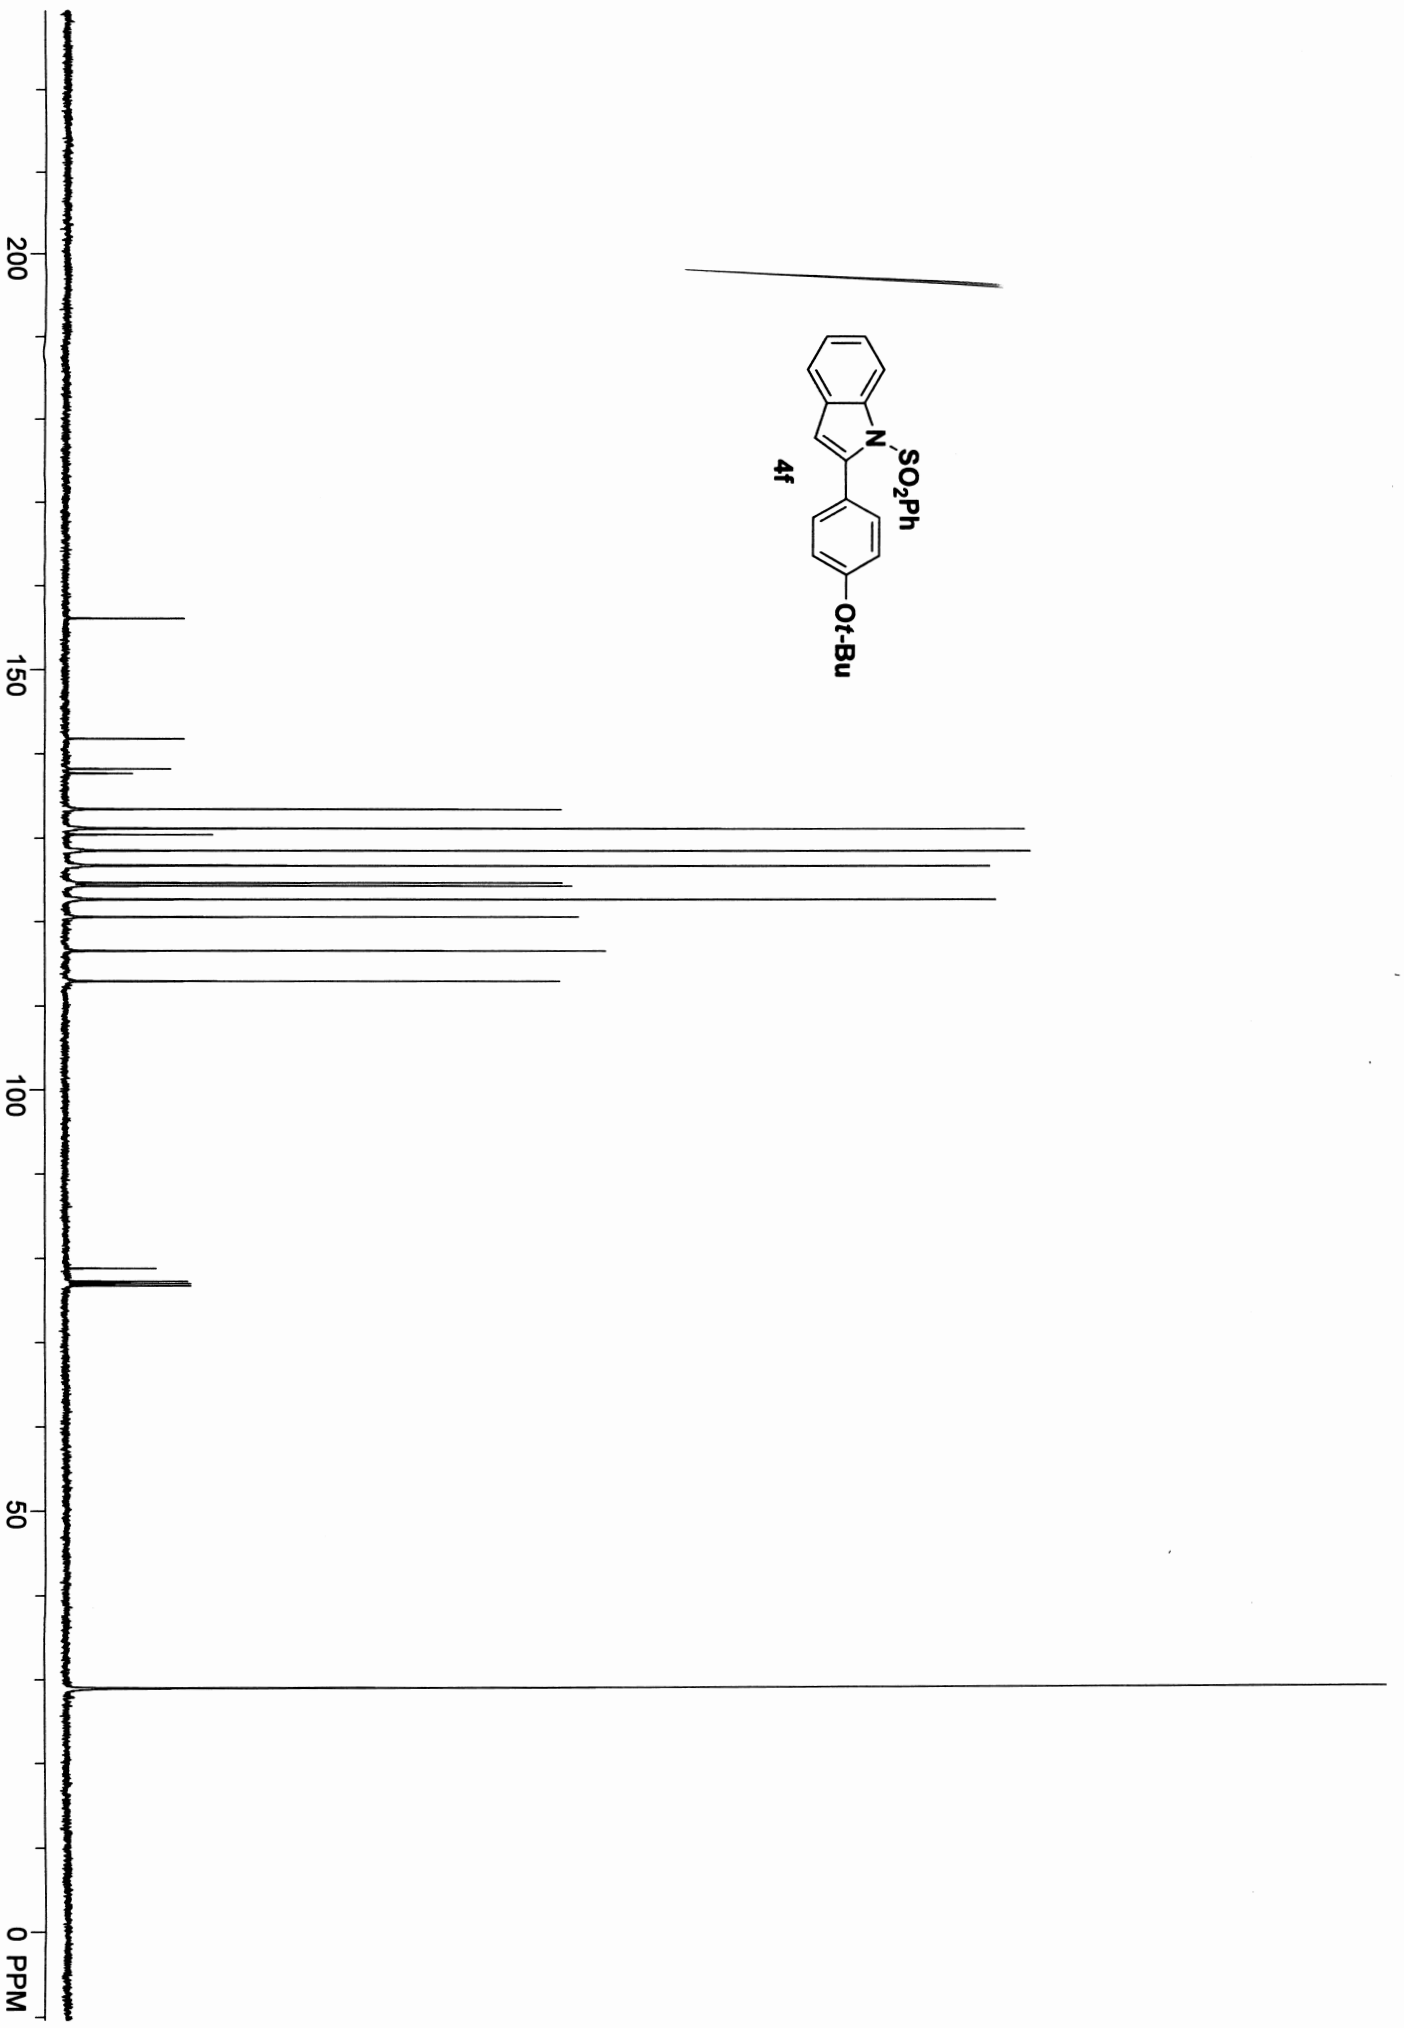

10  
8  
6  
4  
2  
0 PPM

8

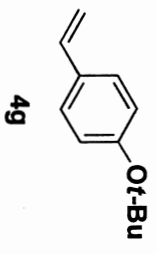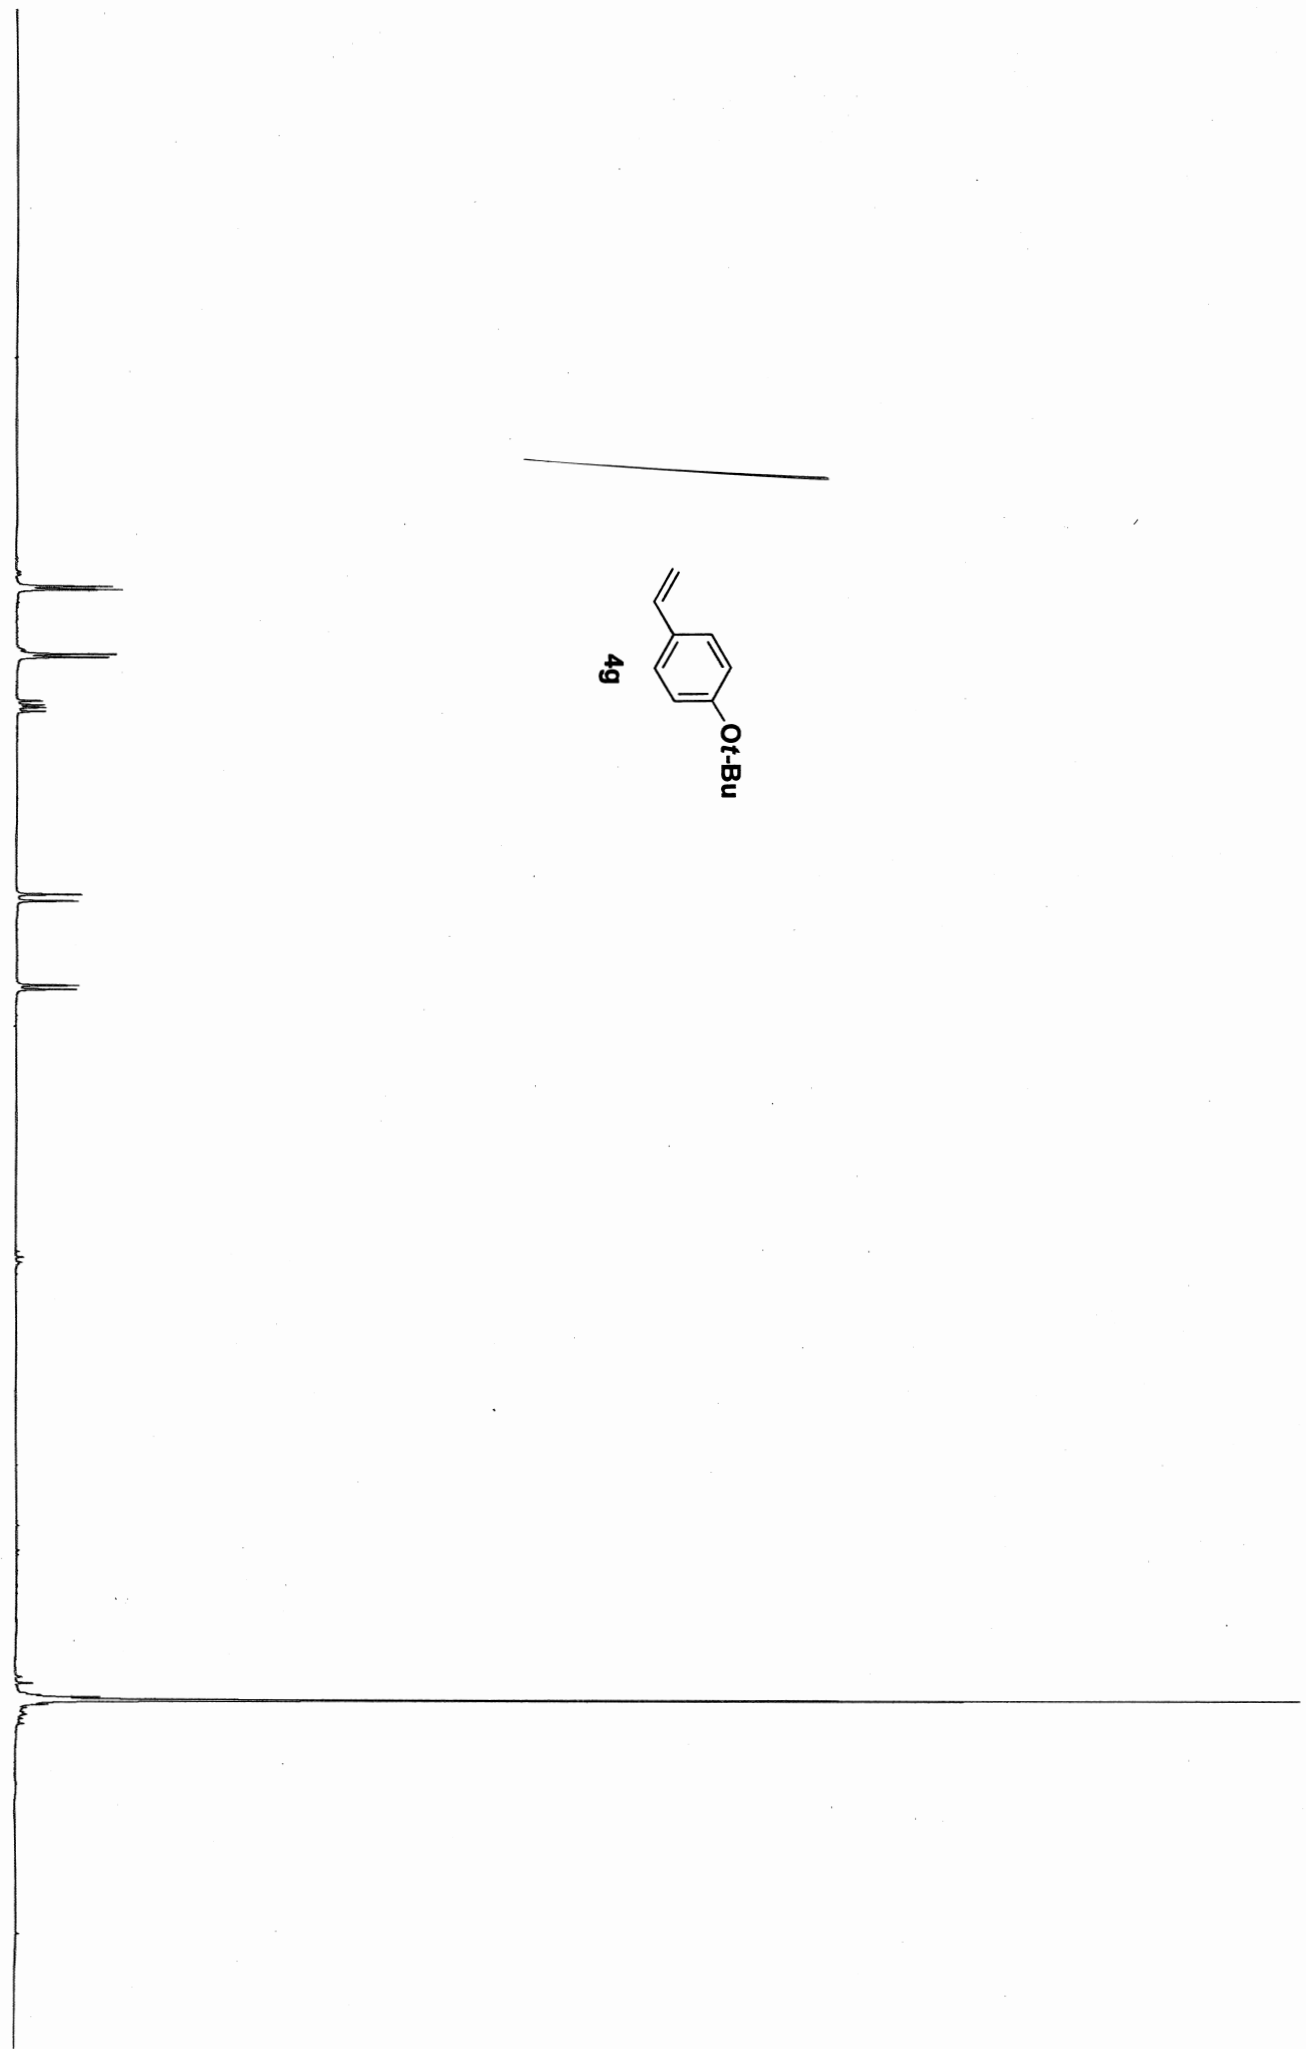

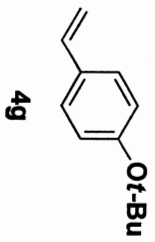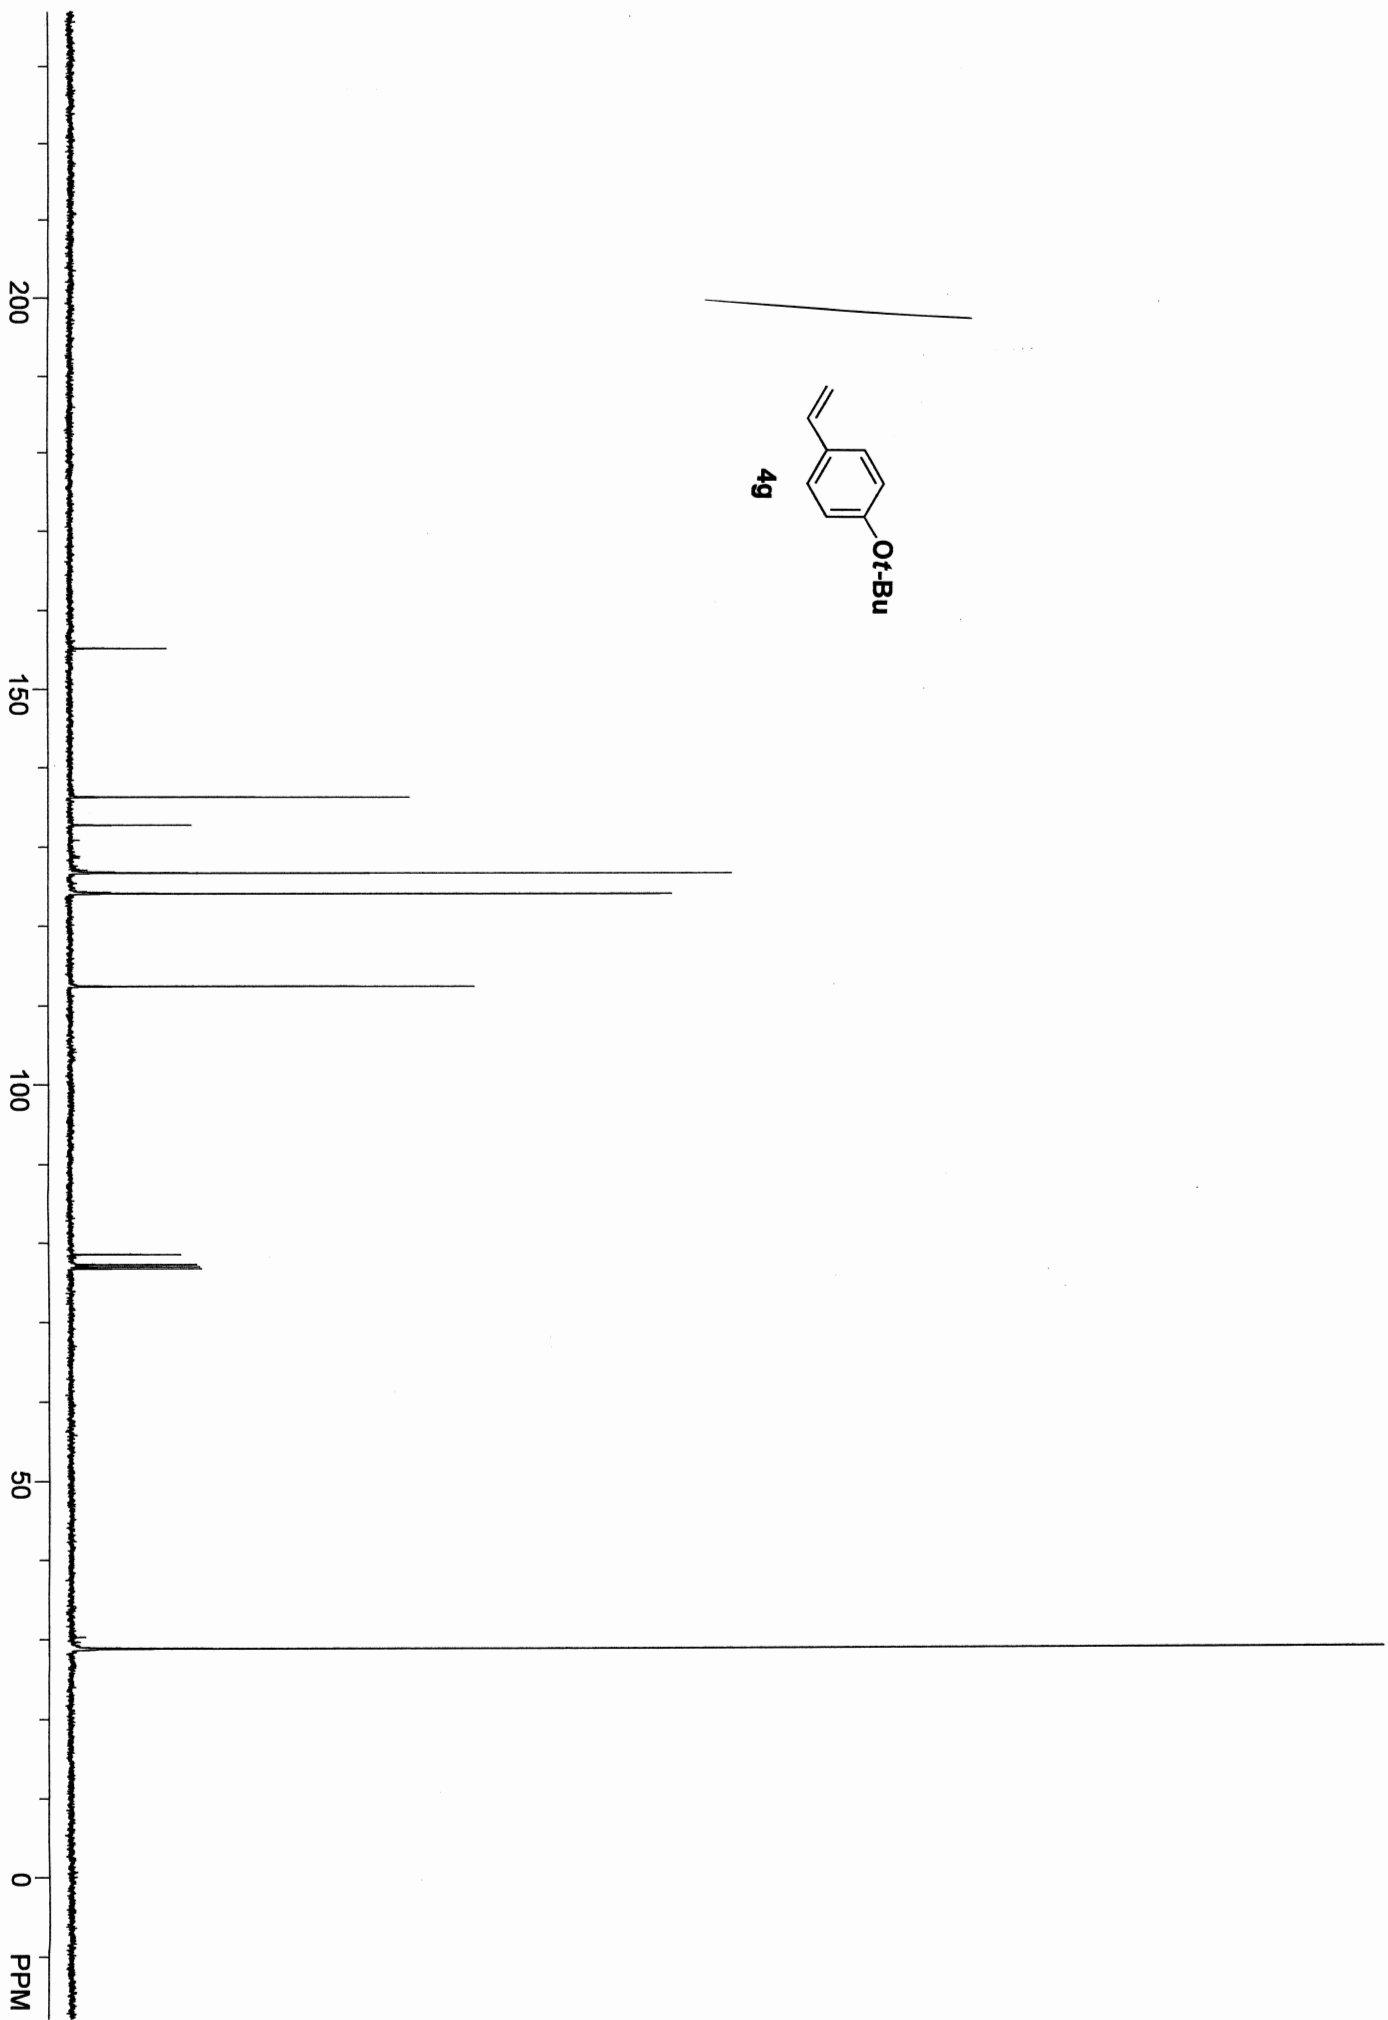

10  
8  
6  
4  
2  
0 PPM

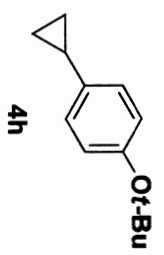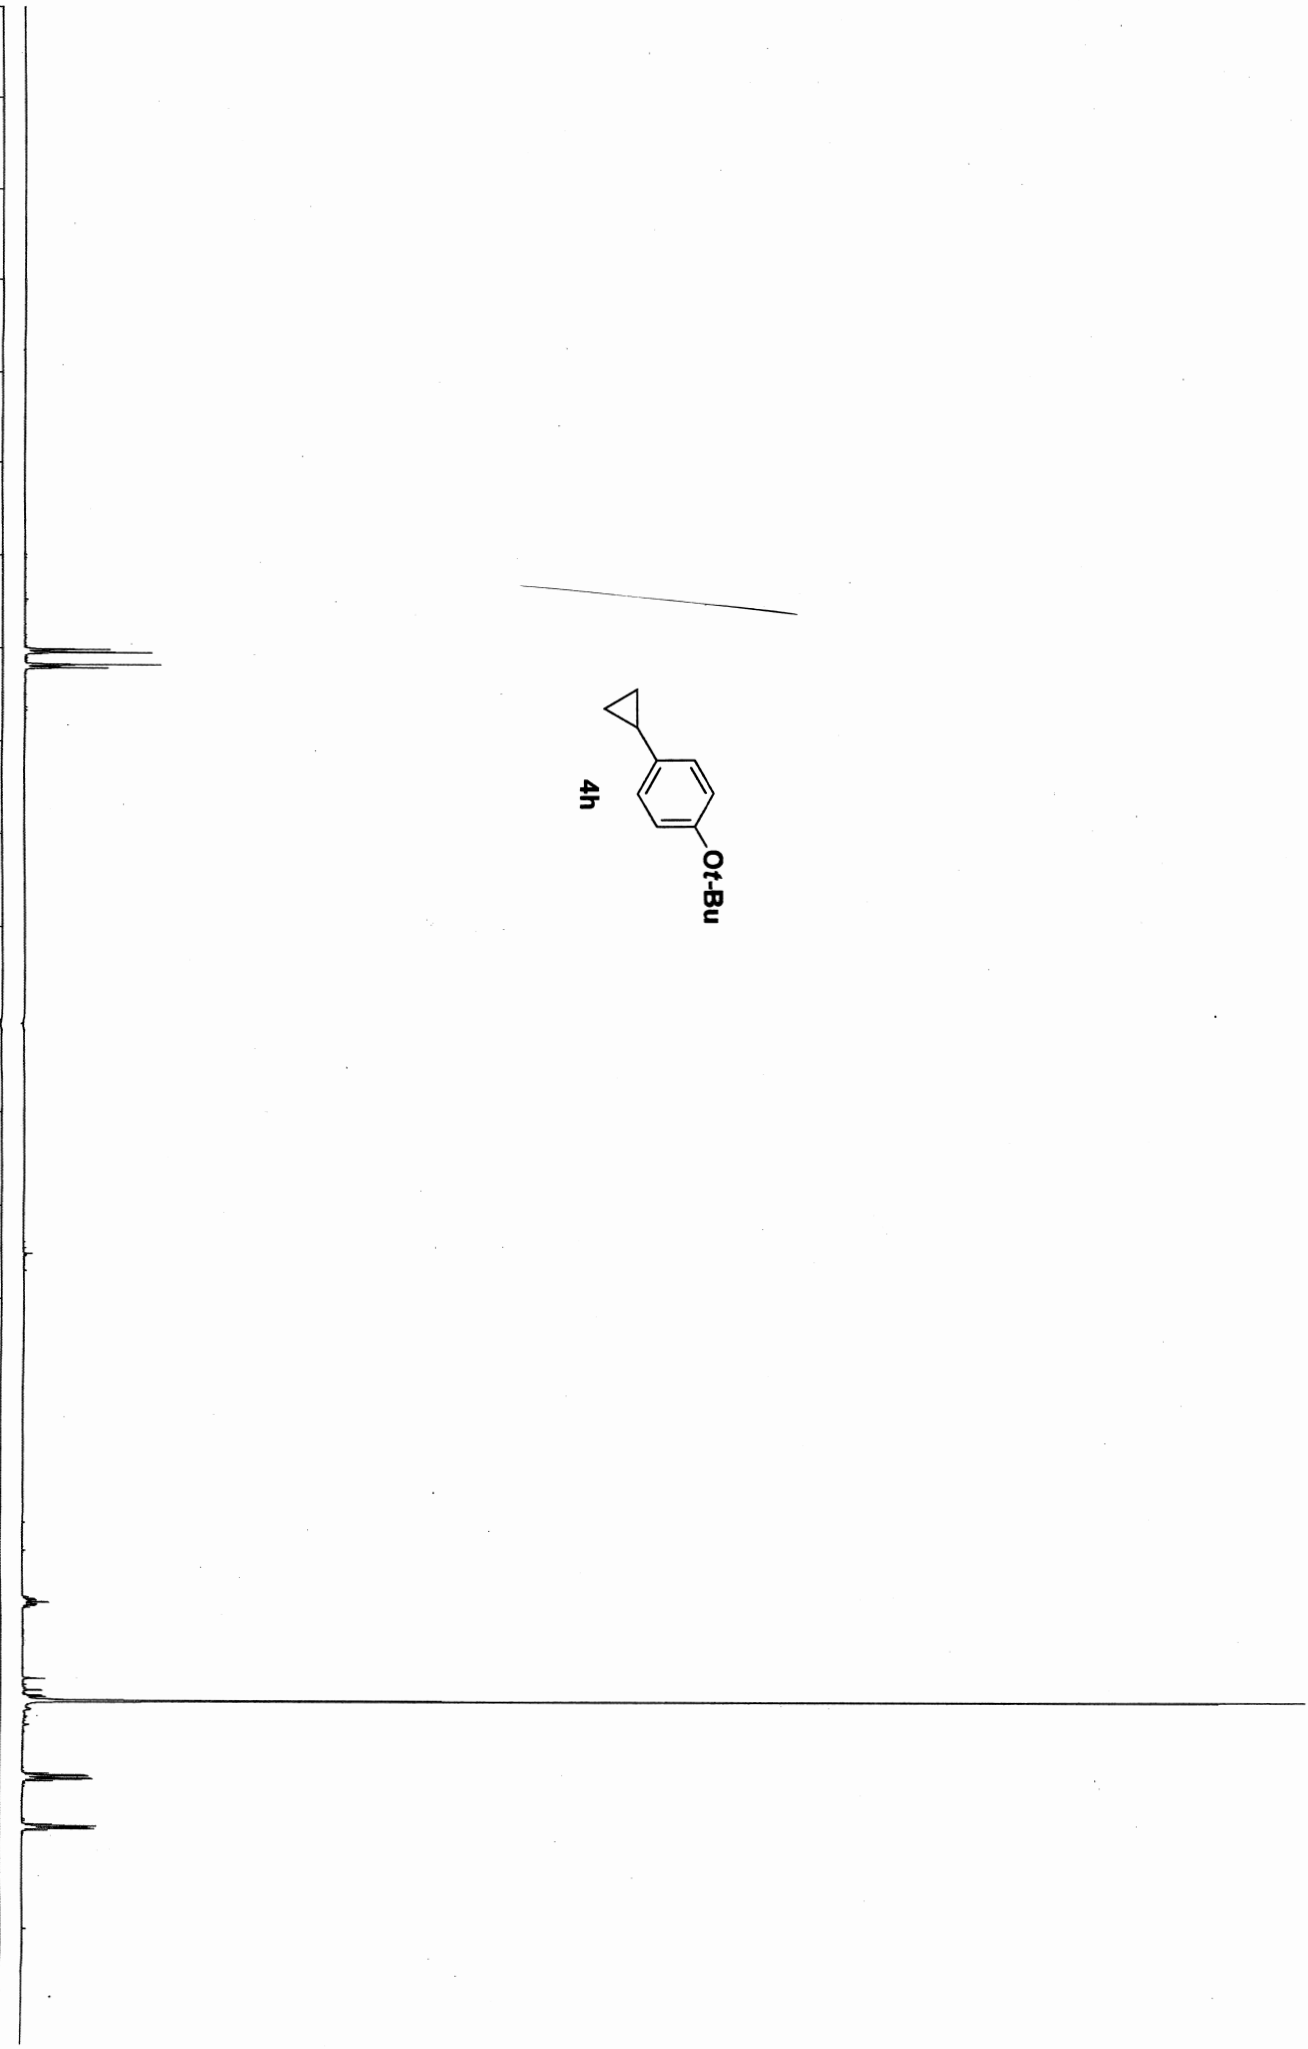

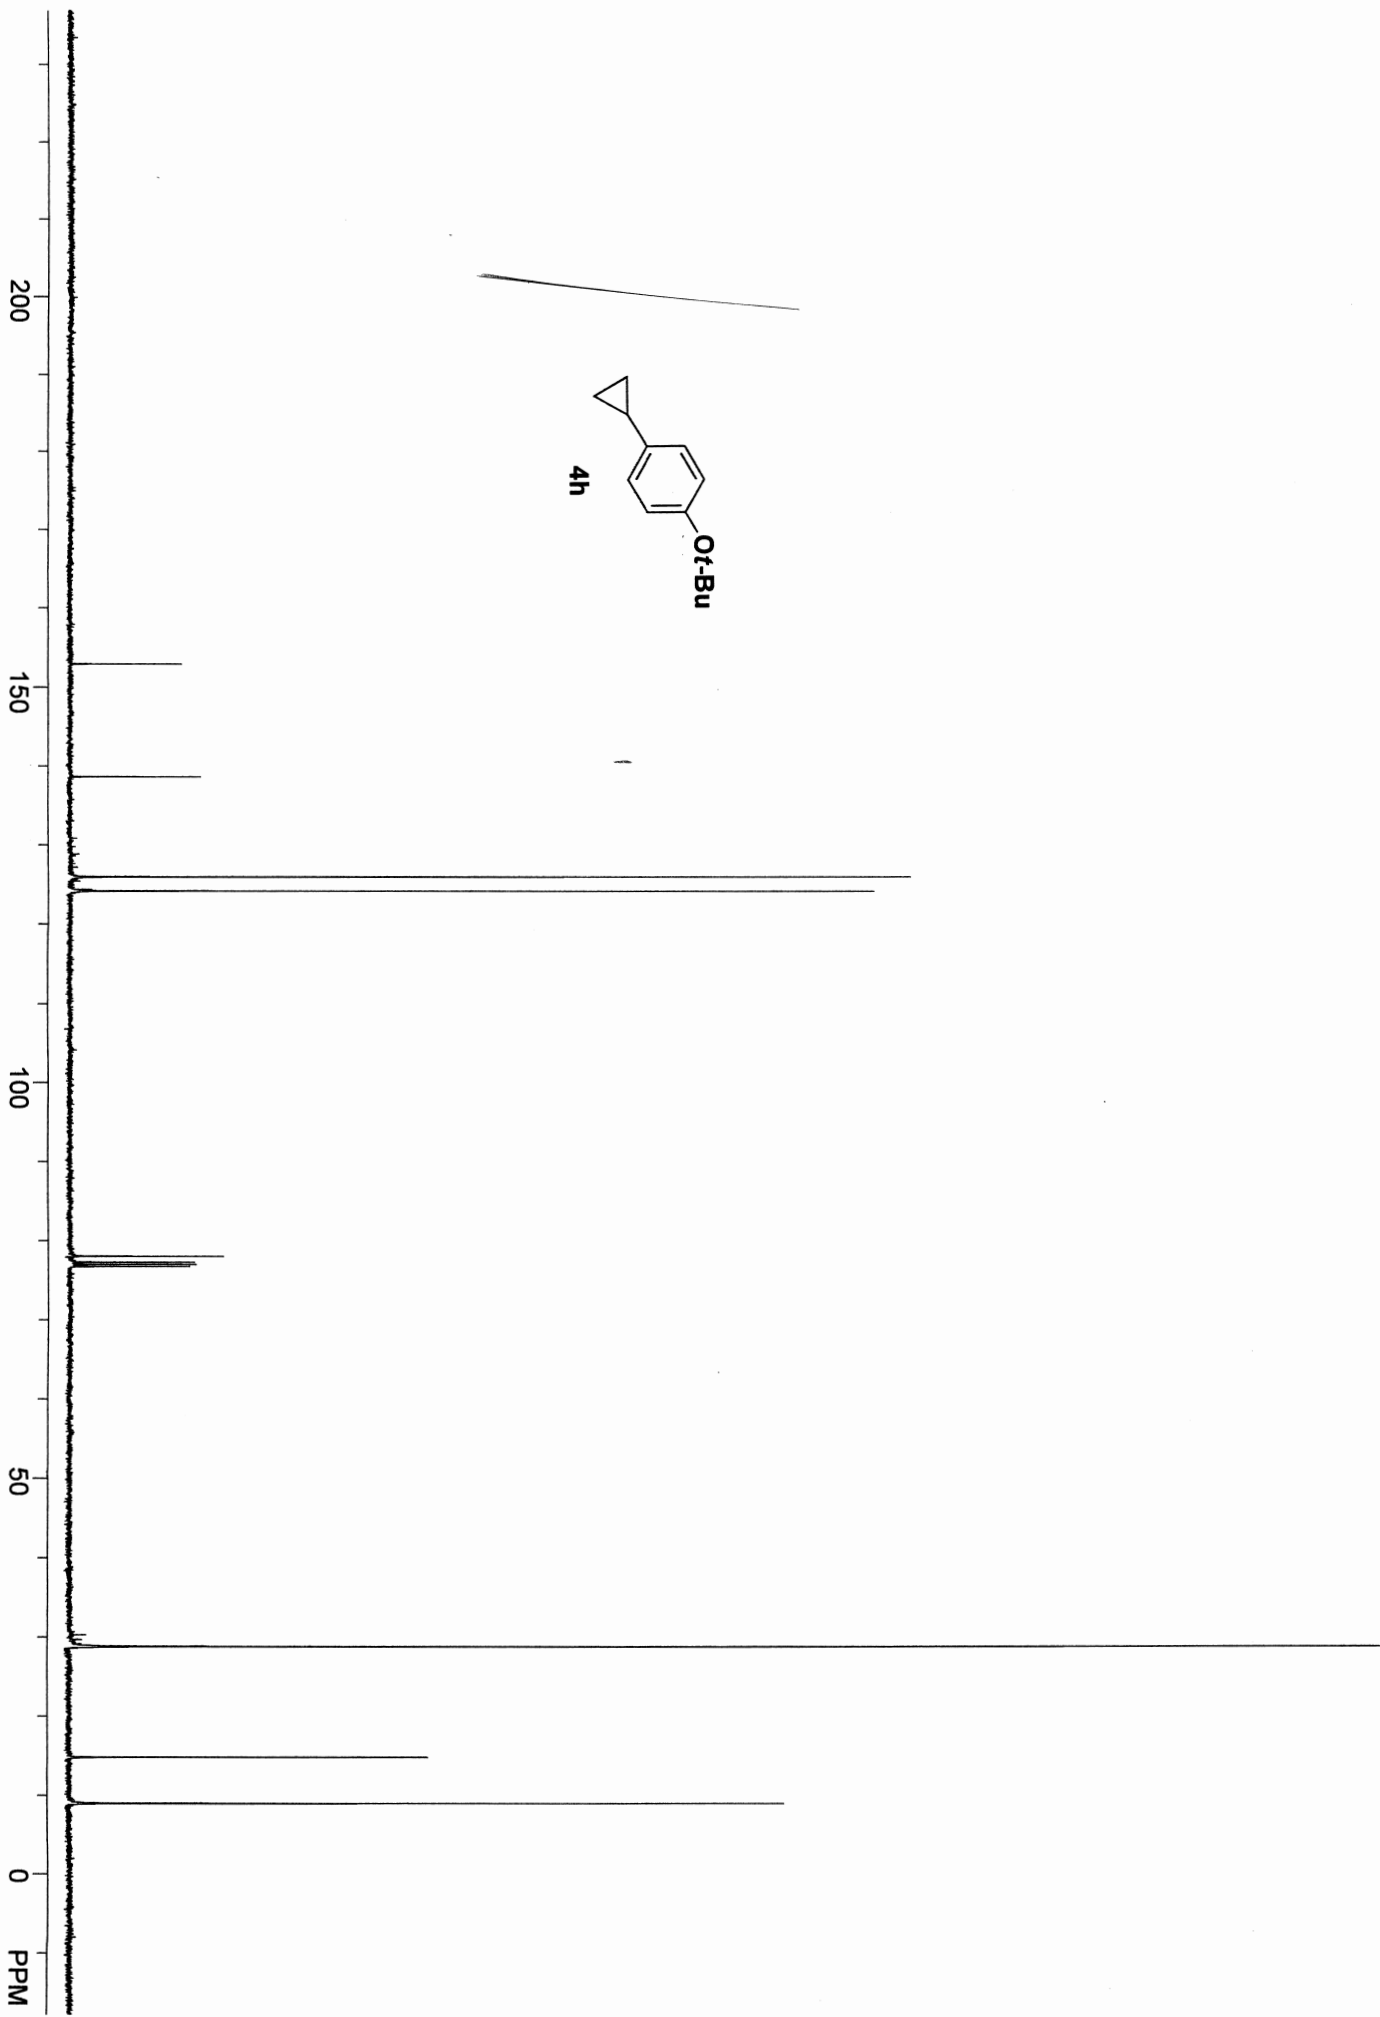



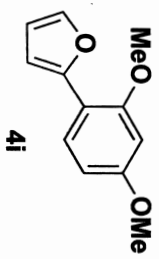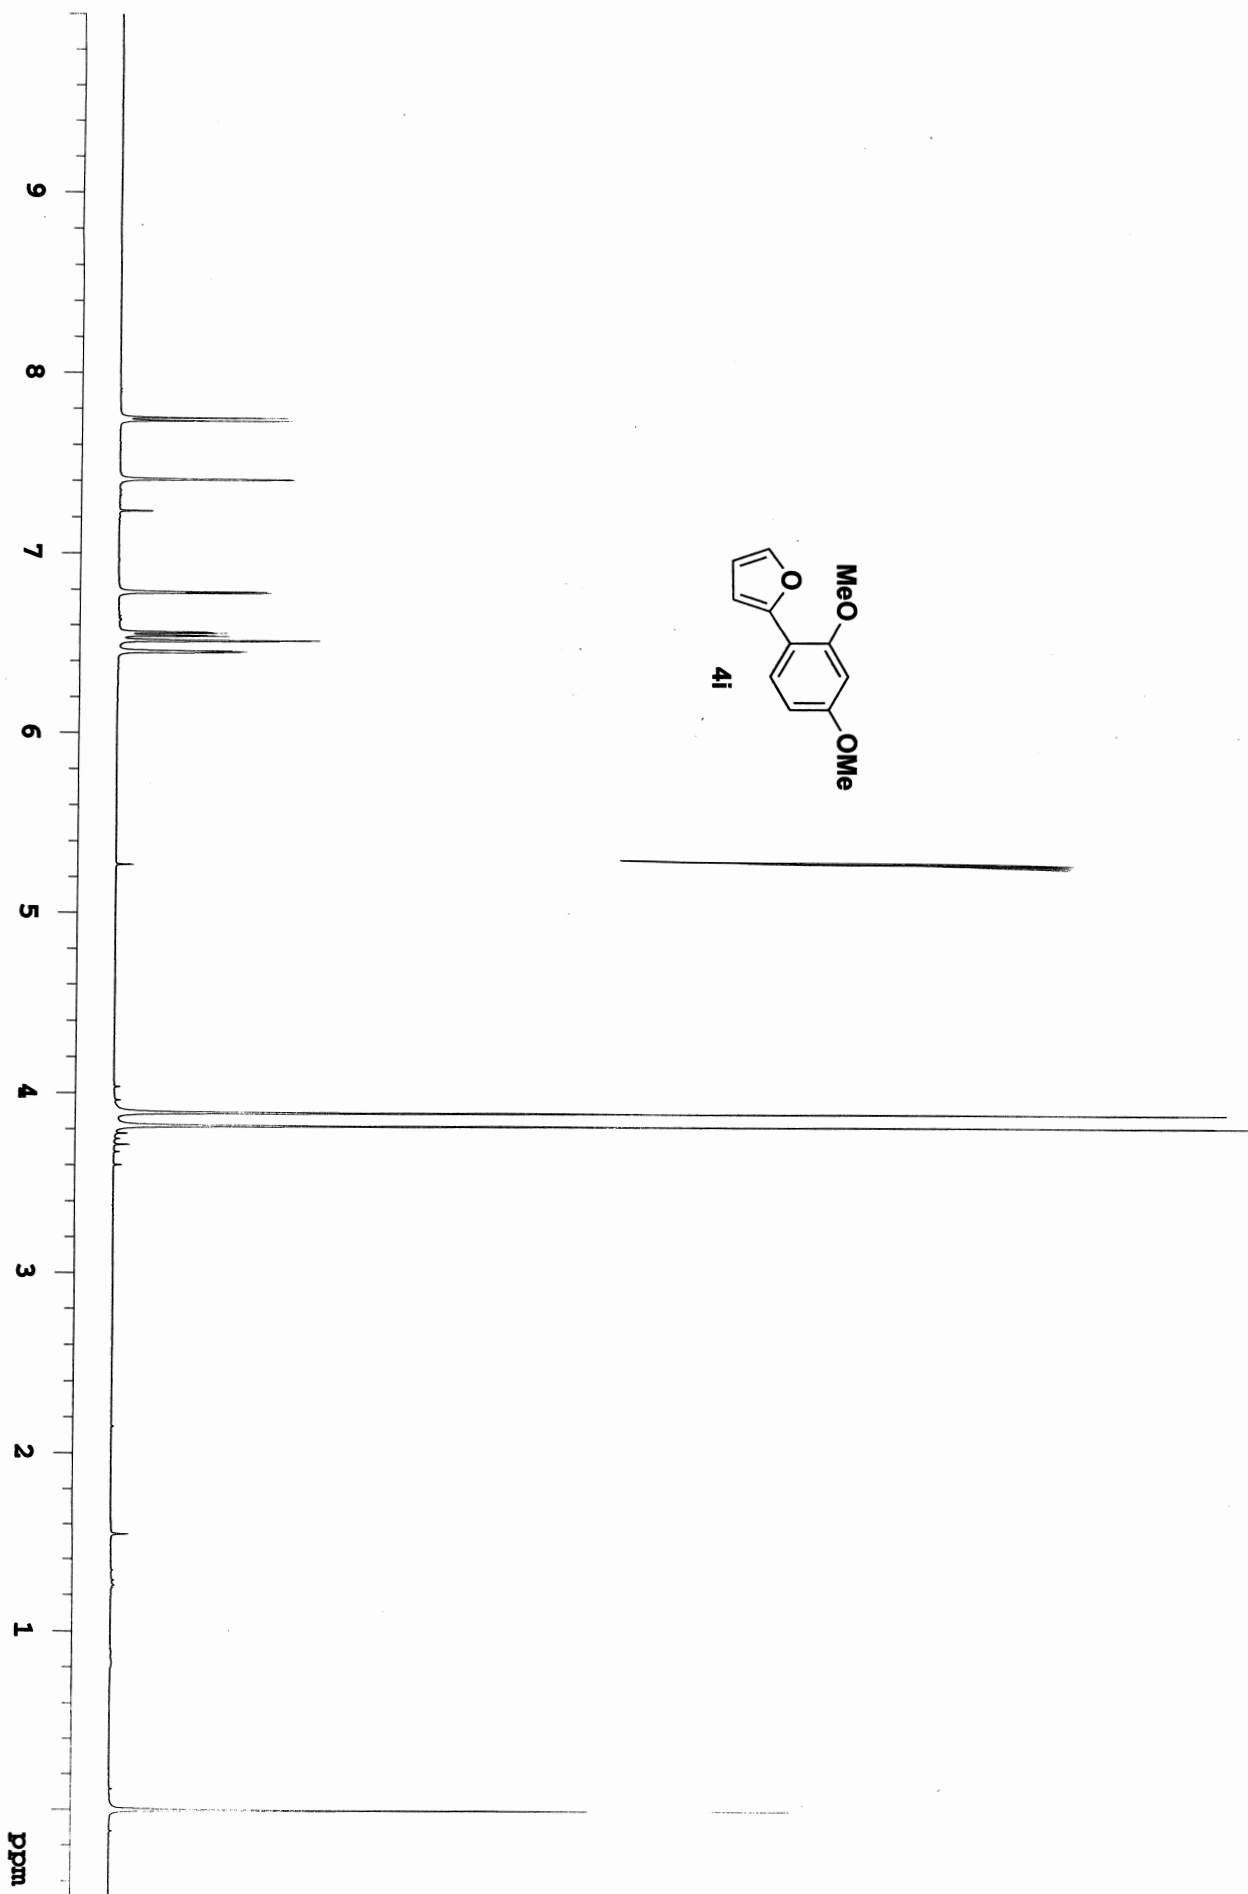

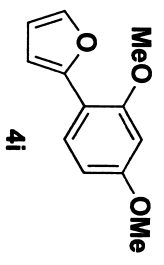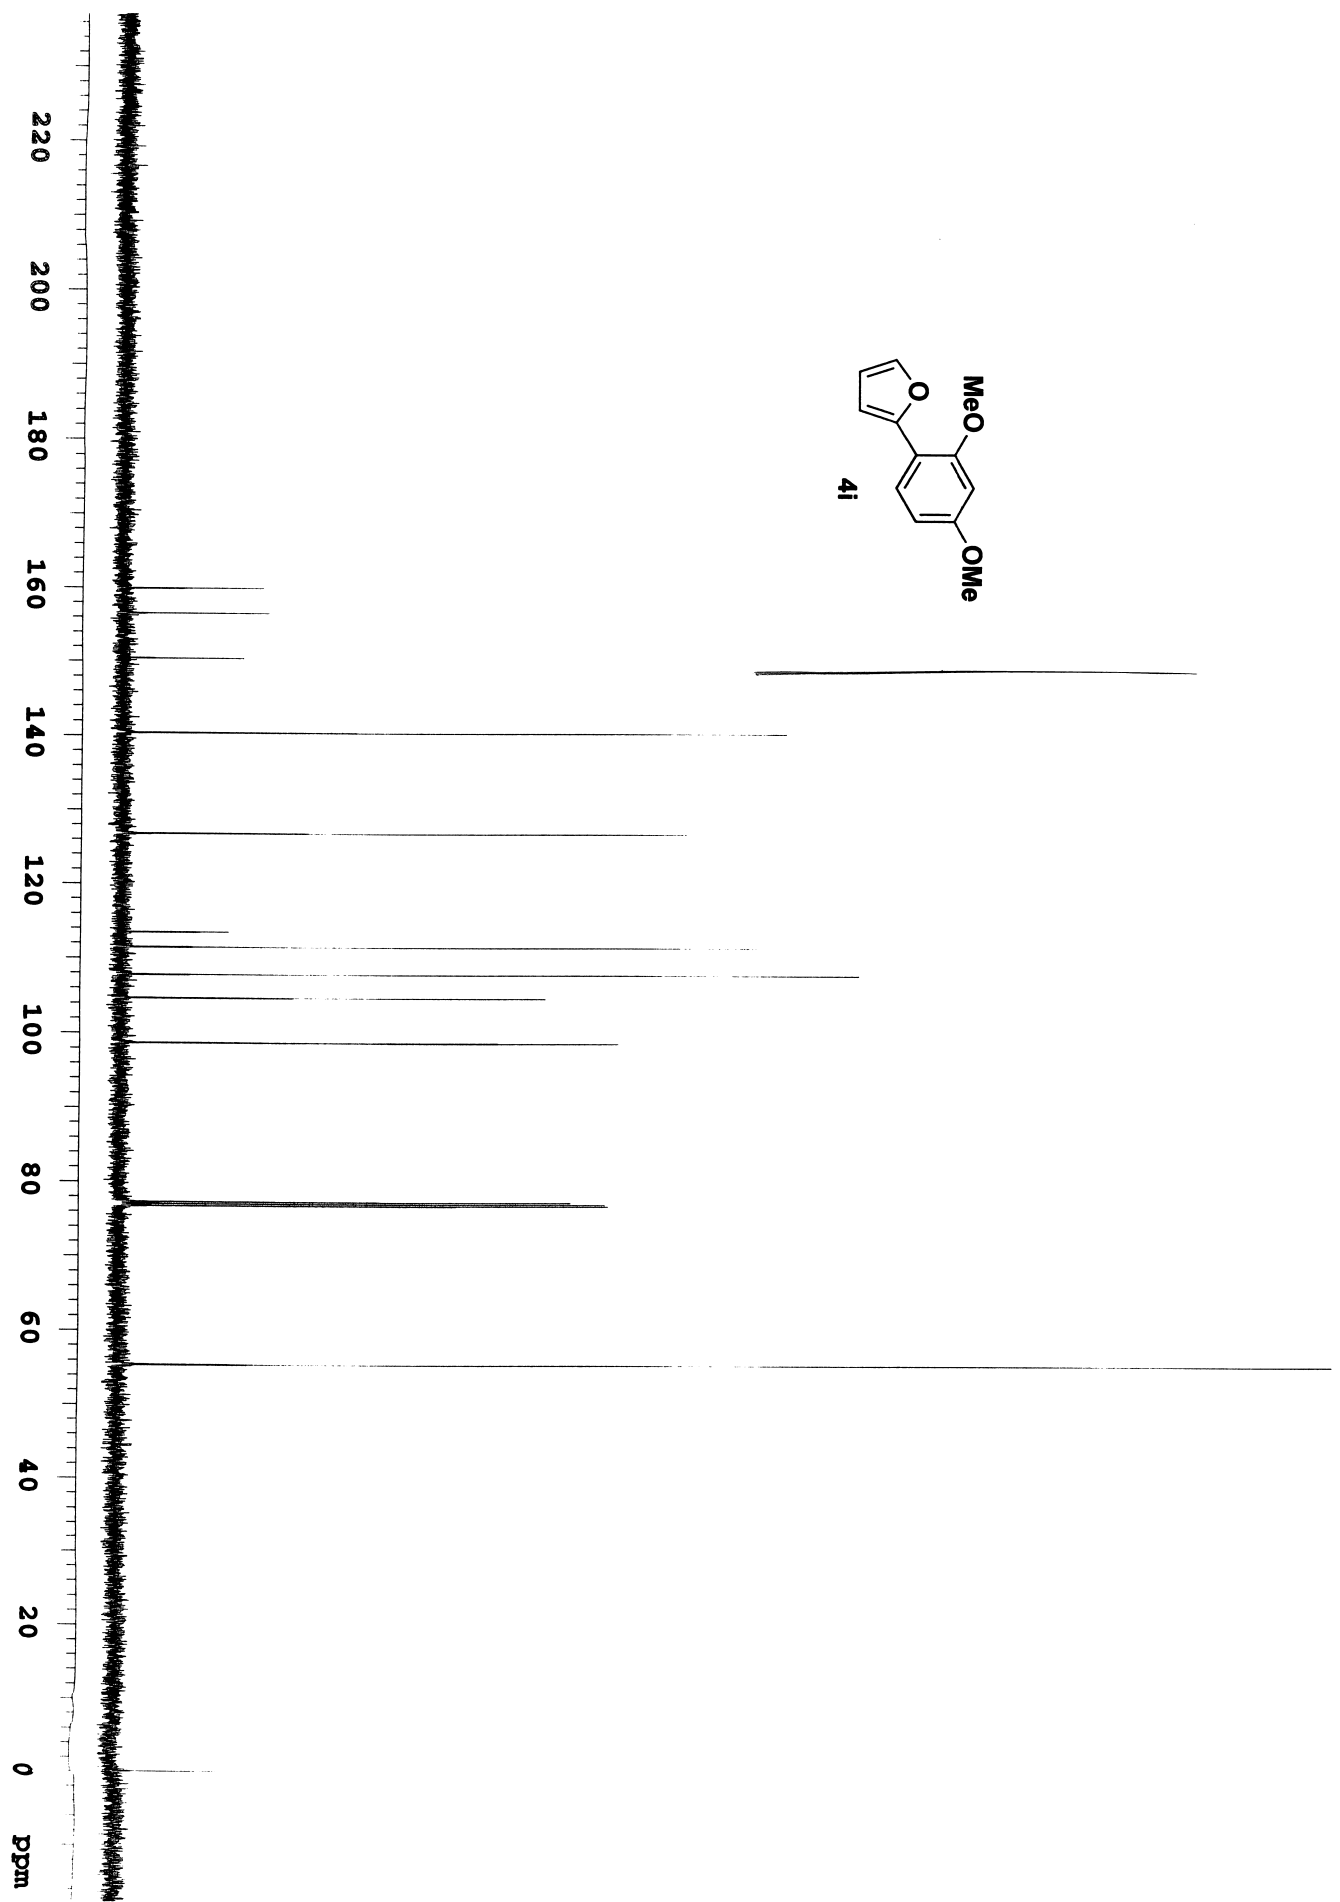

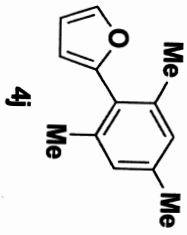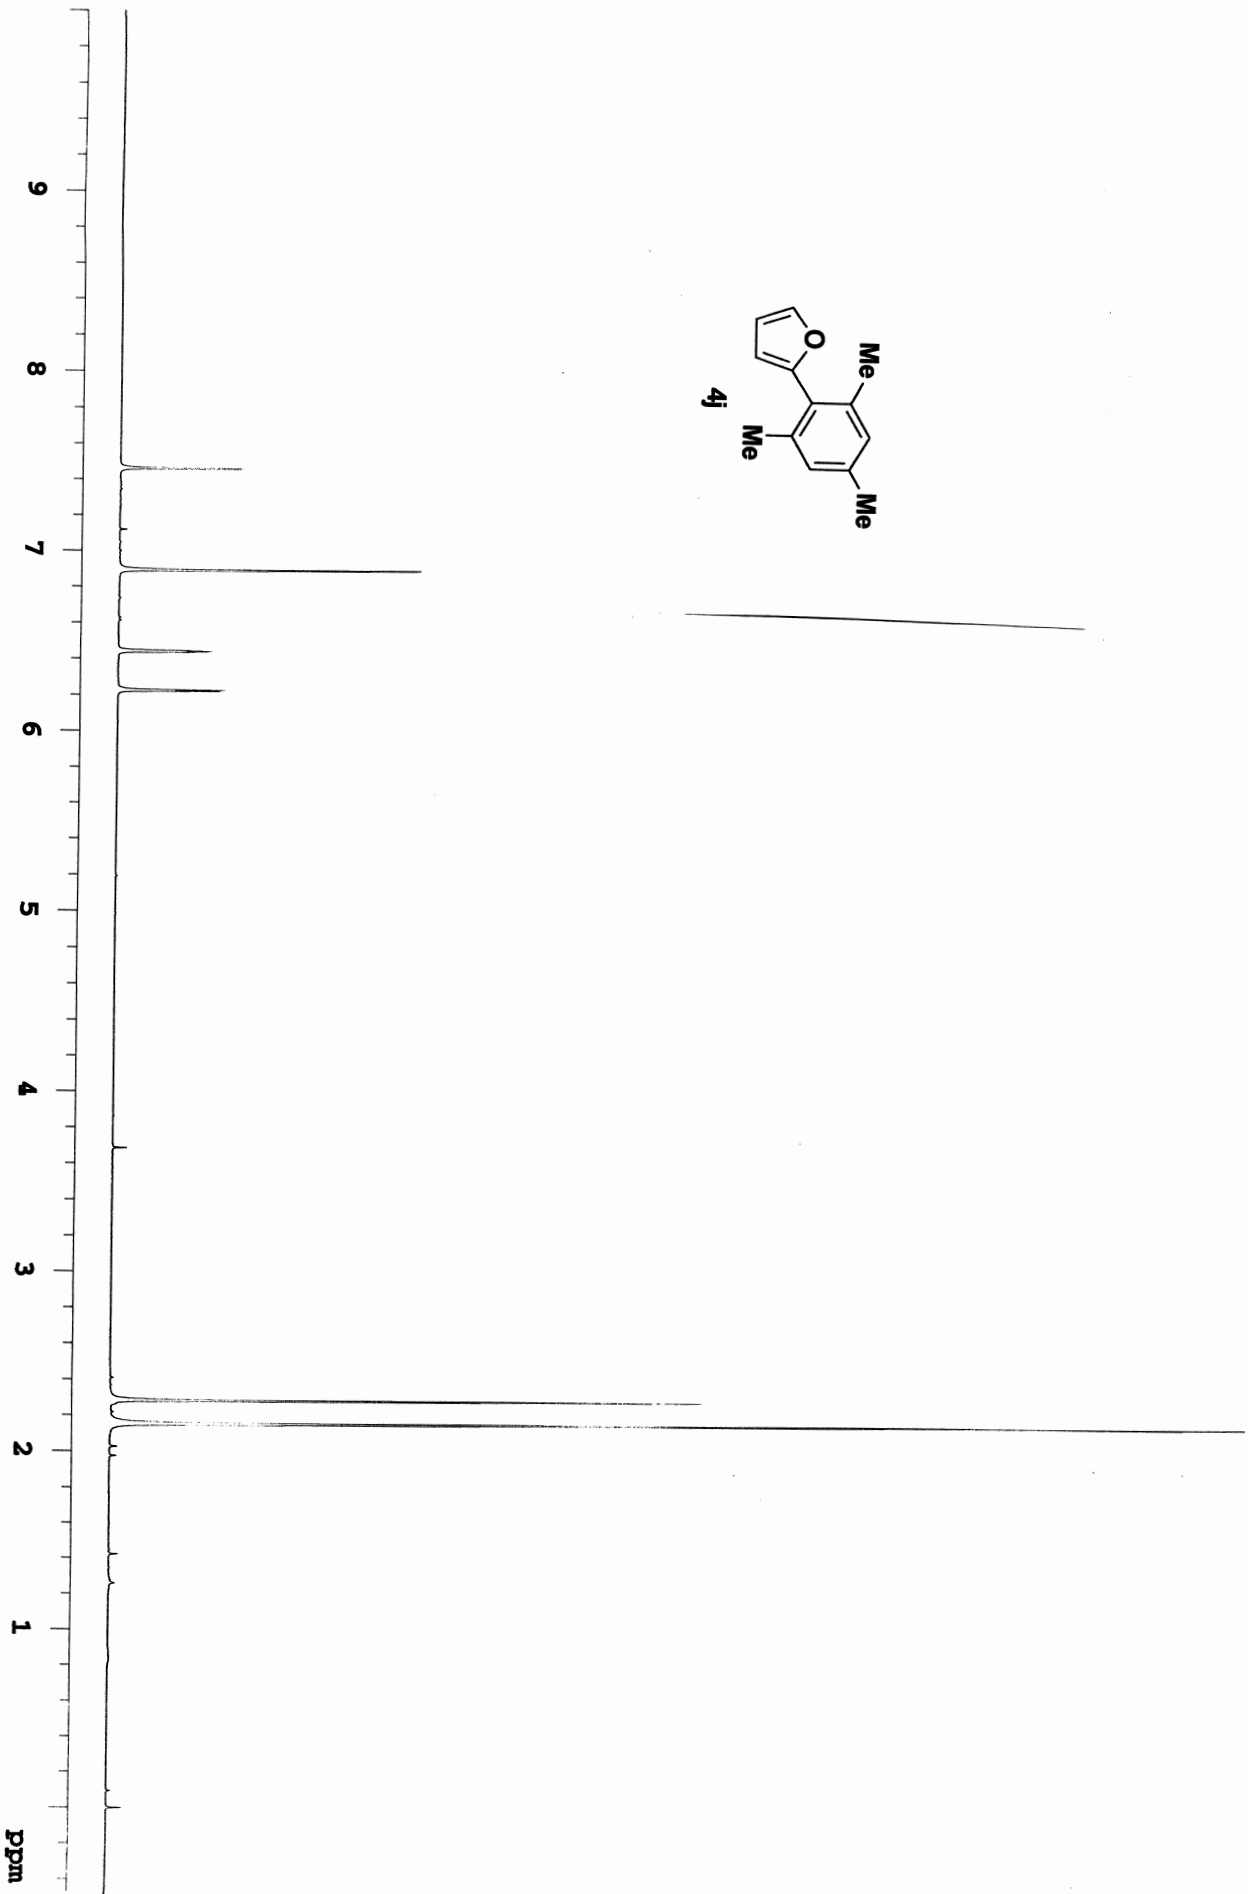

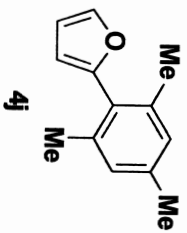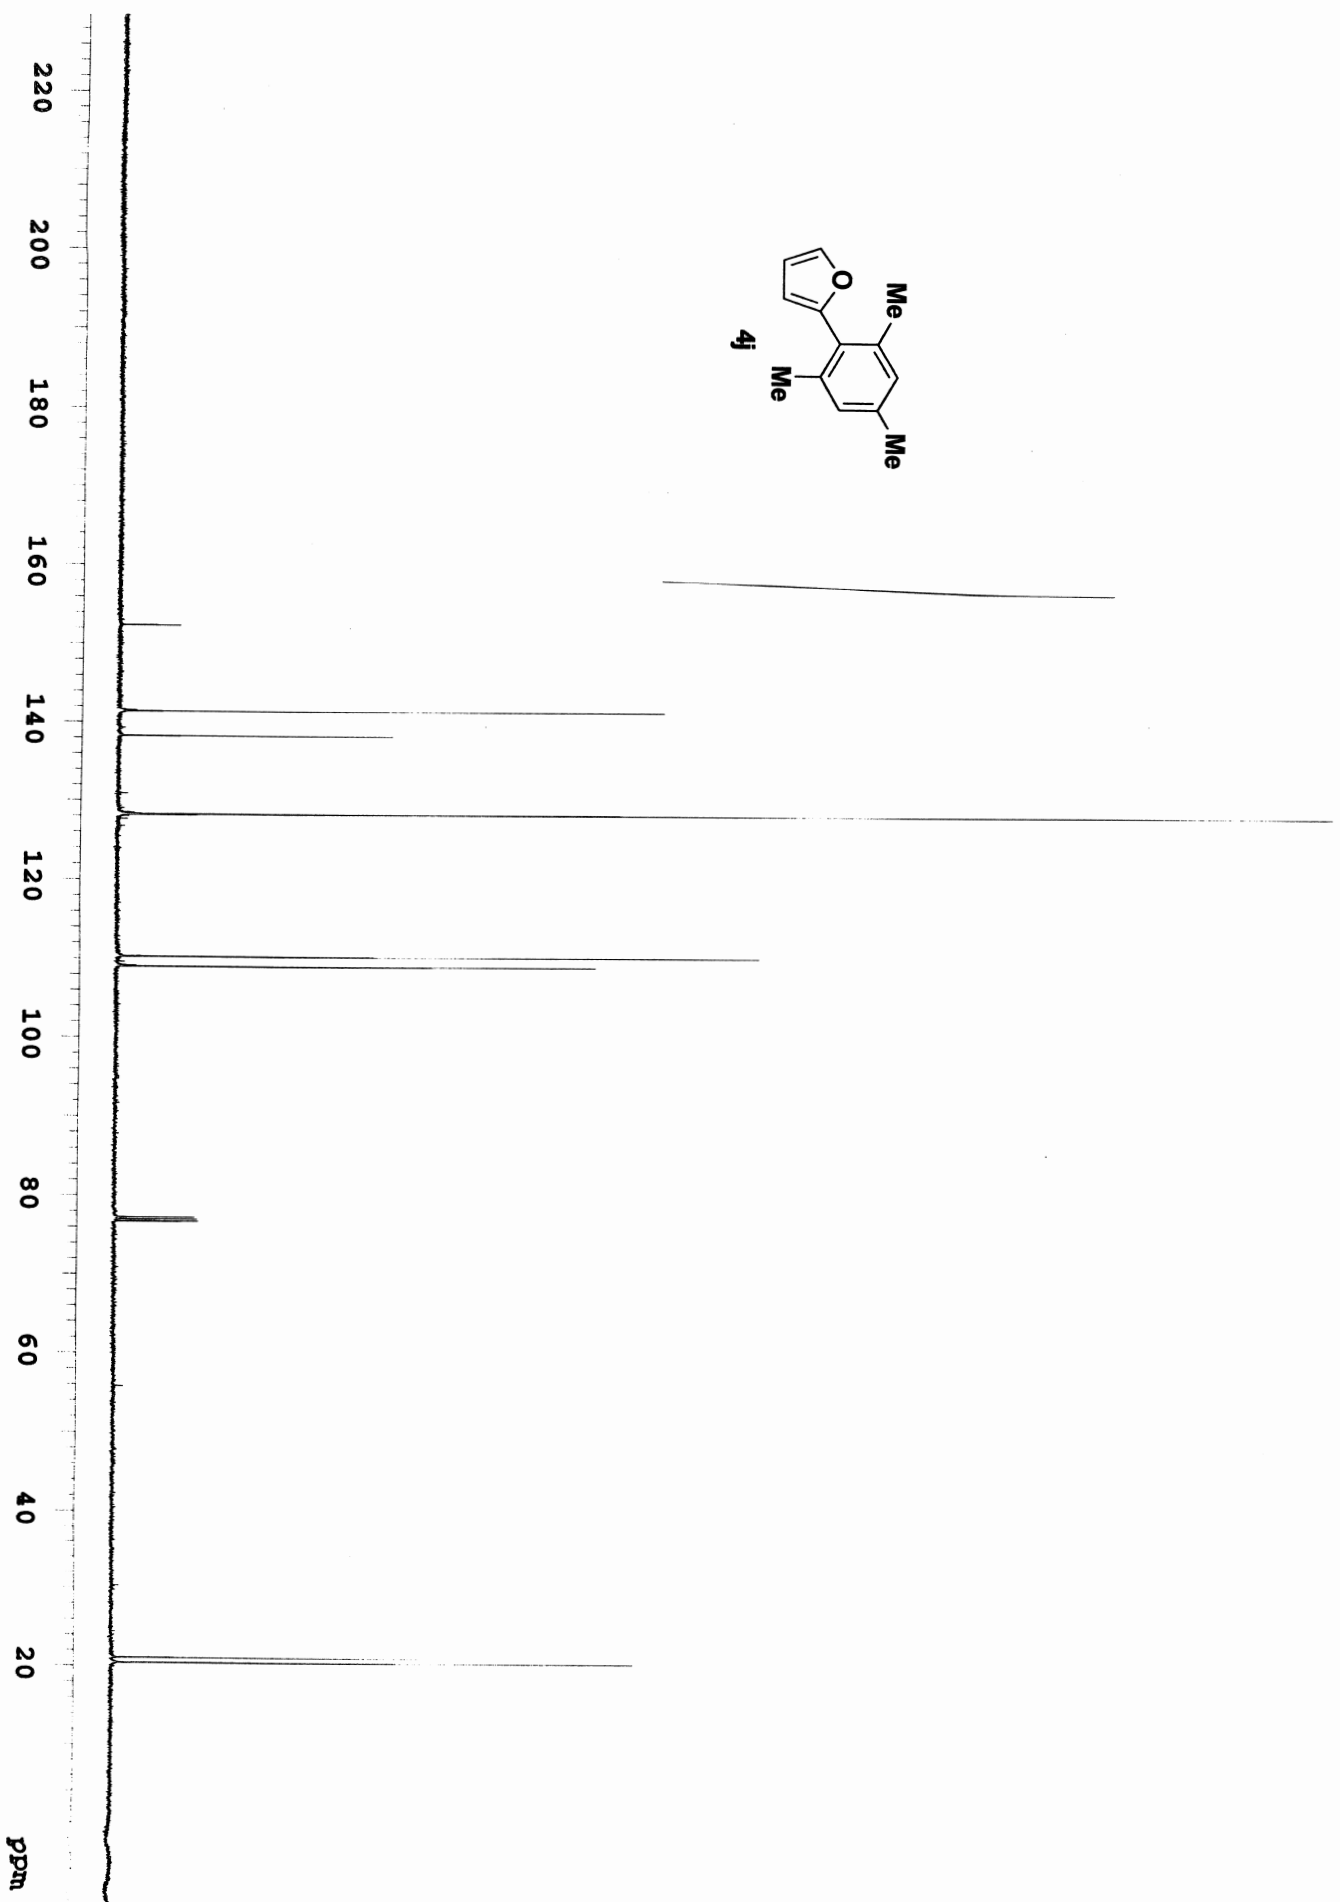

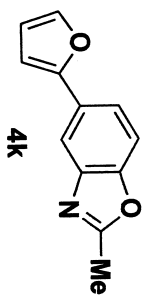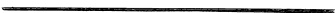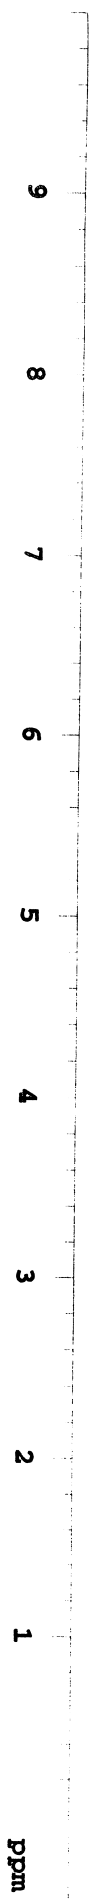

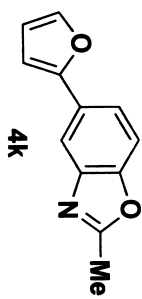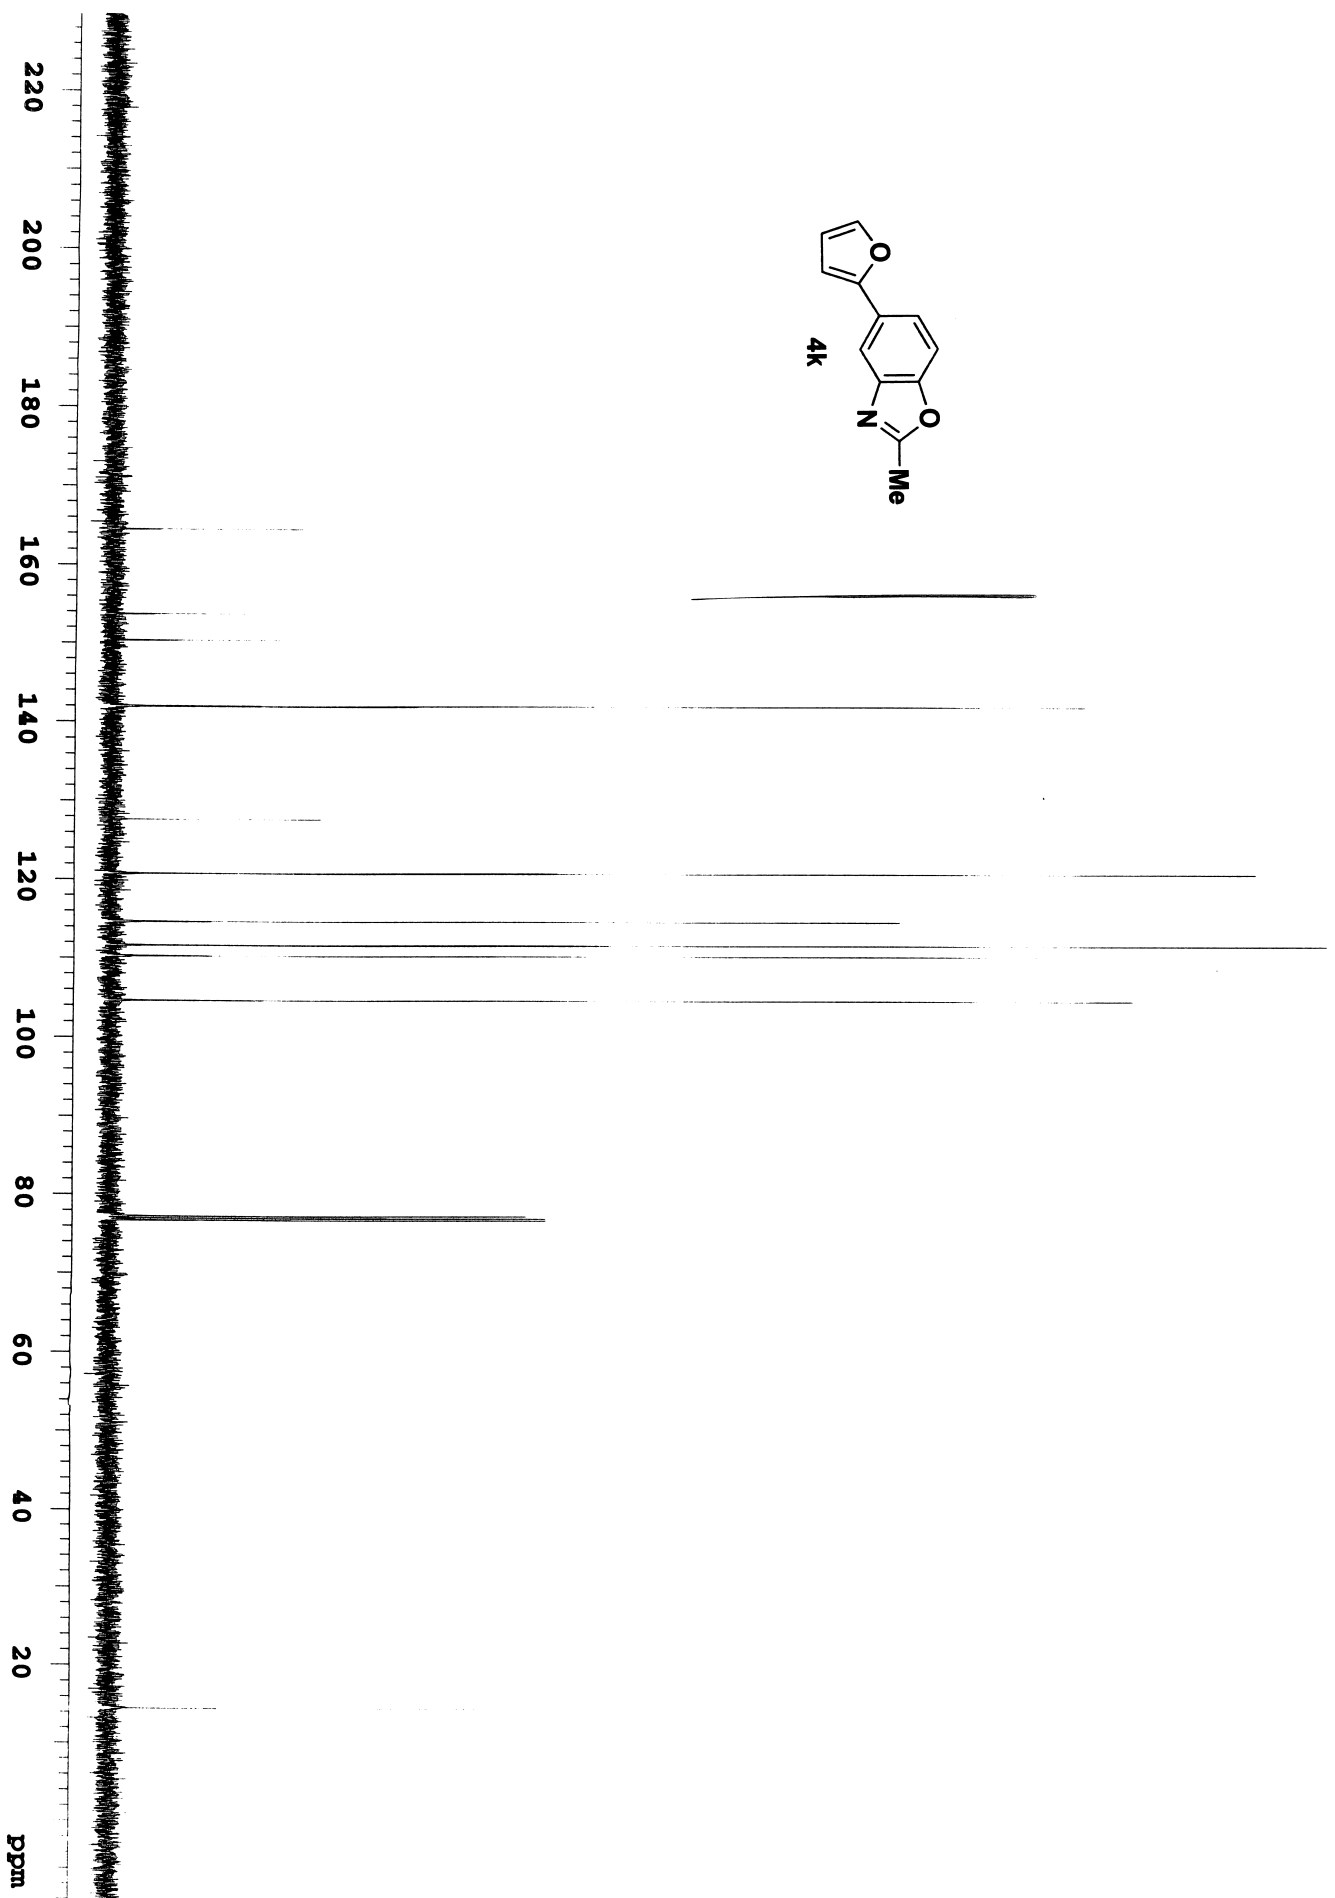

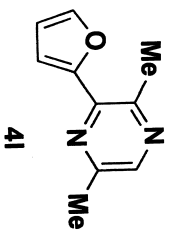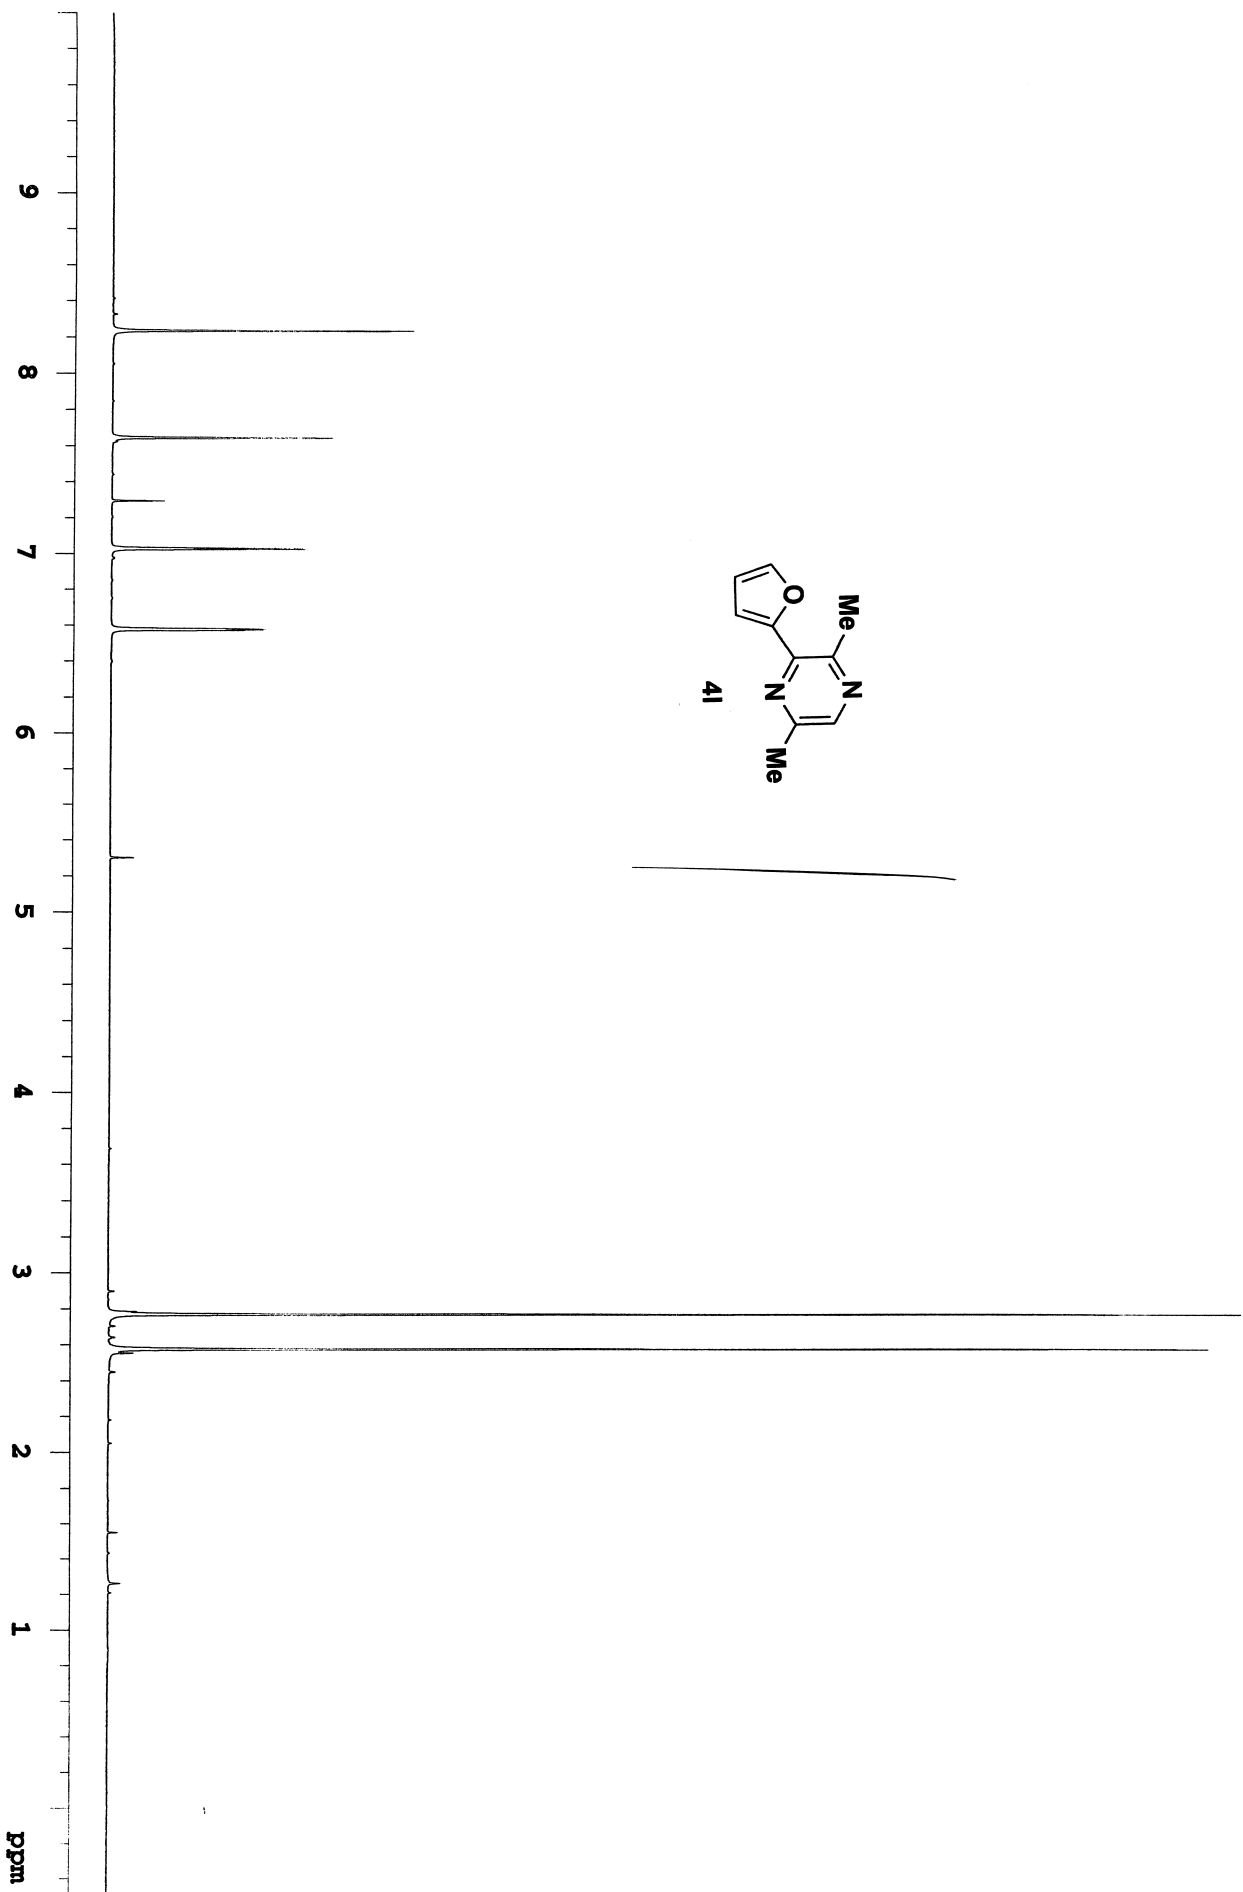

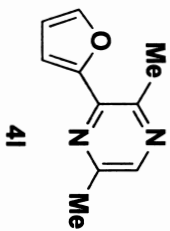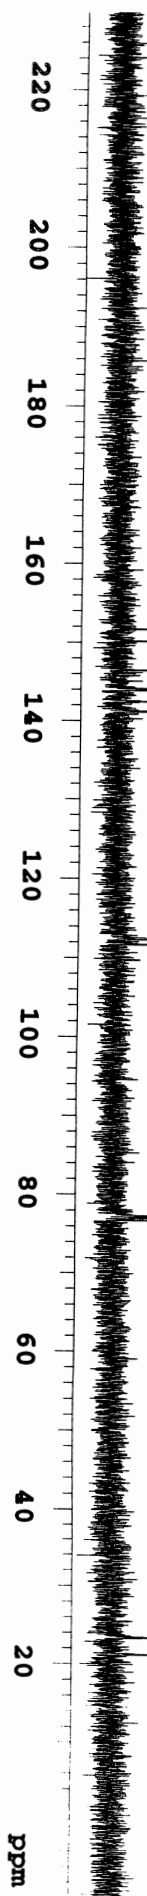



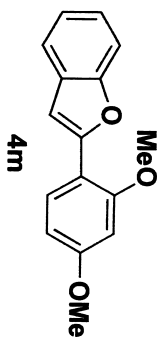

1

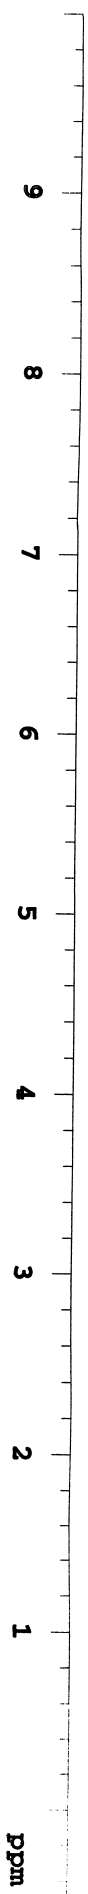

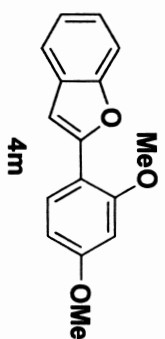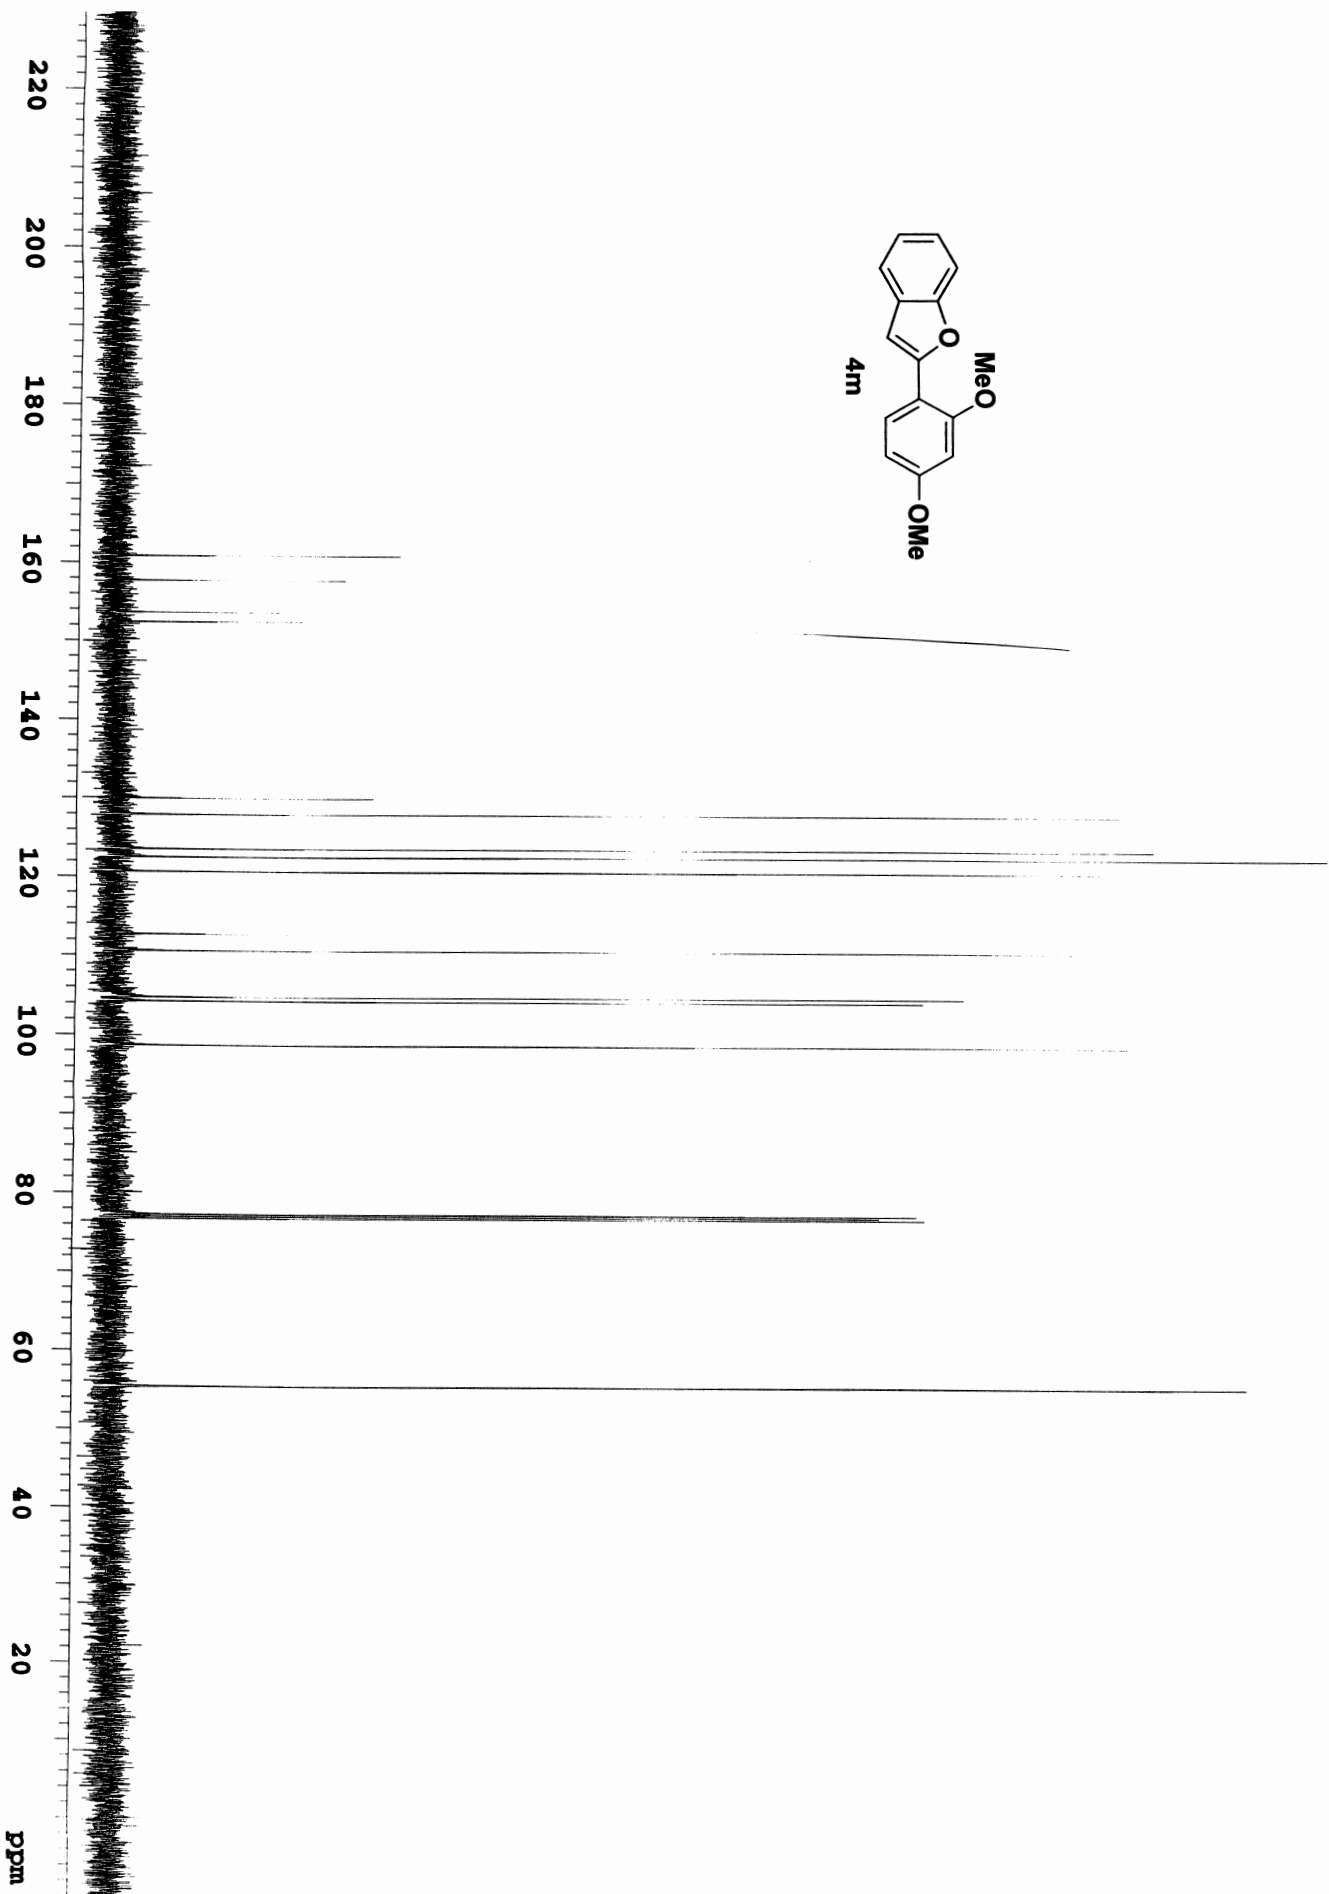

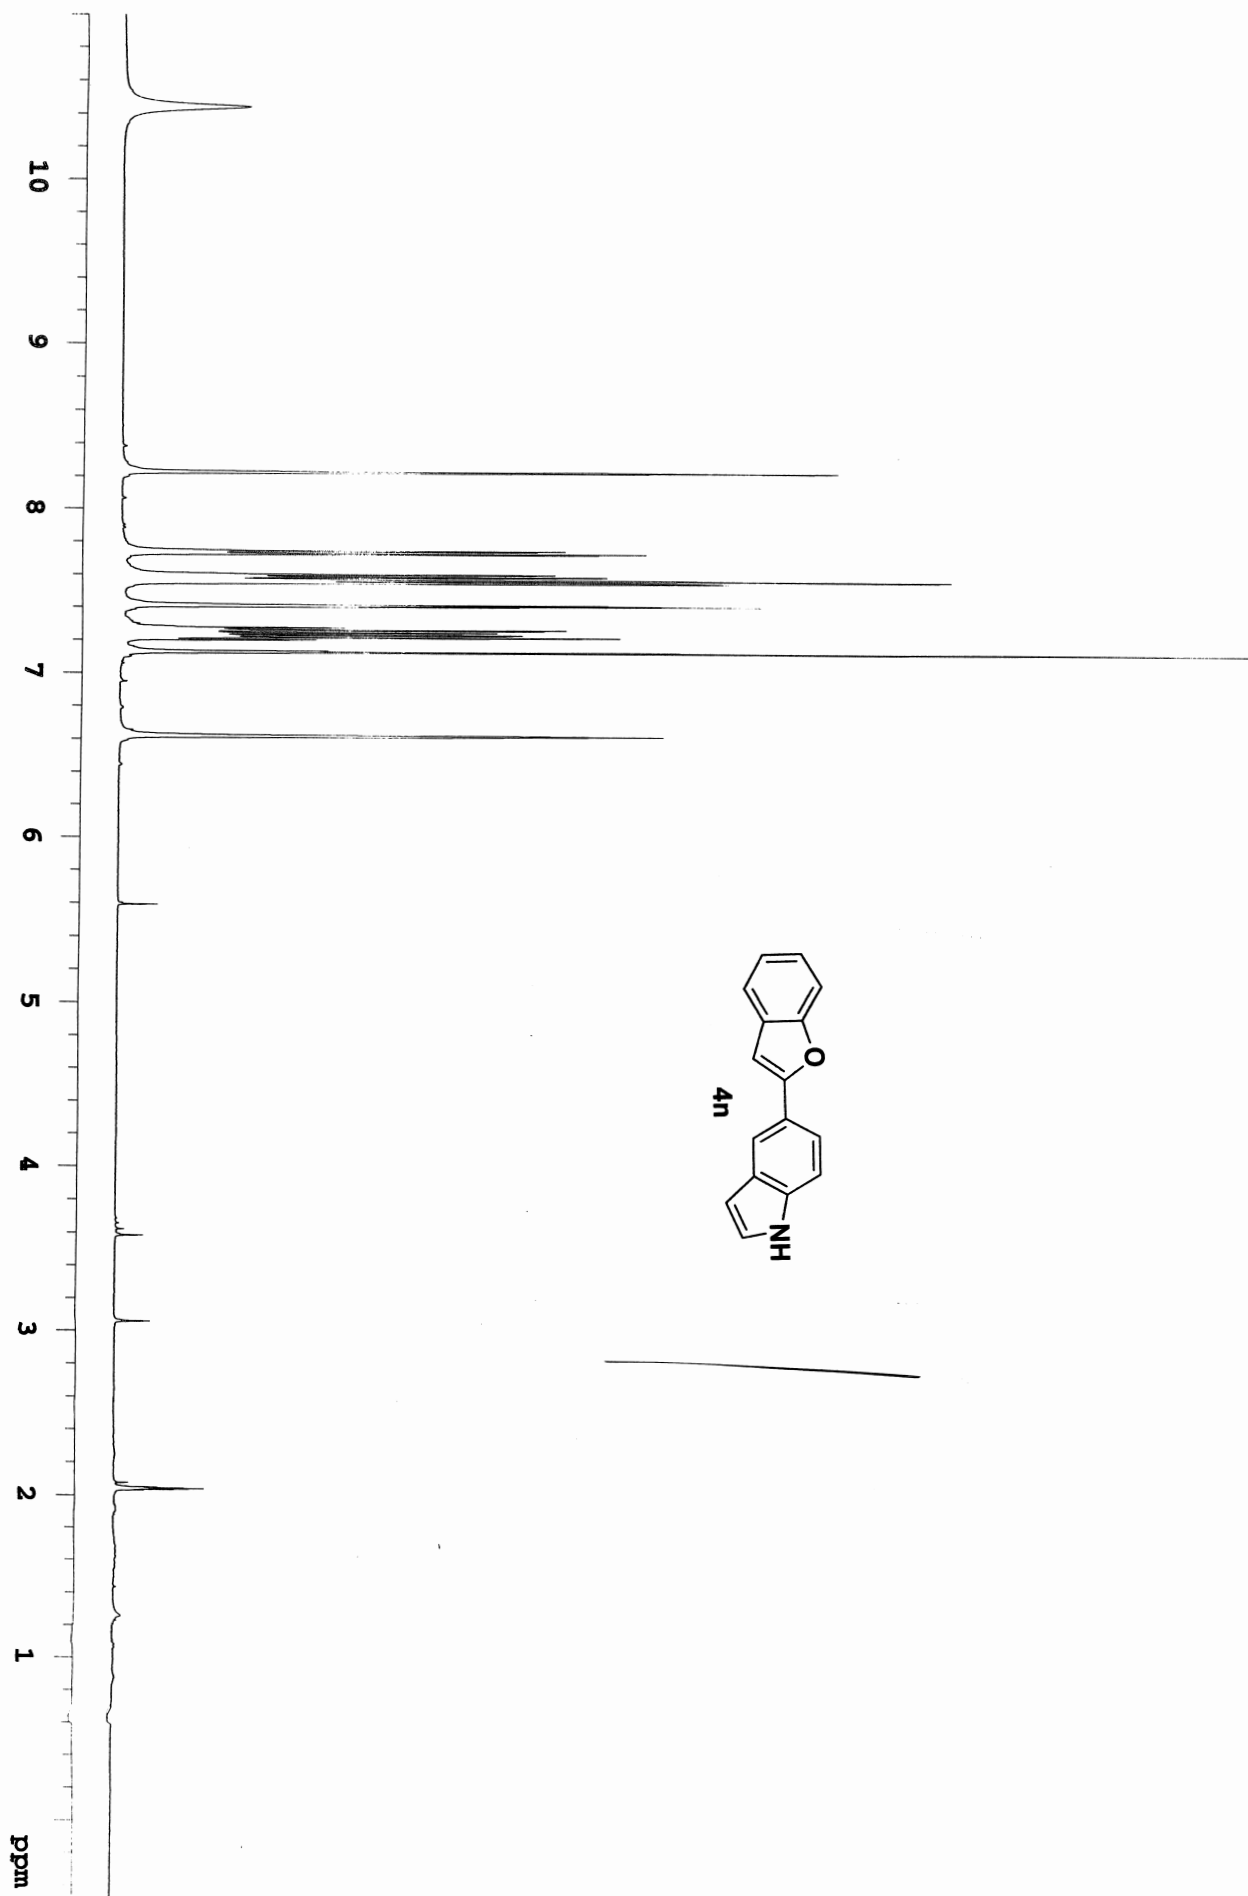

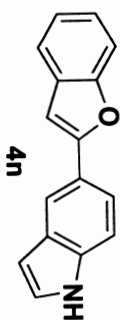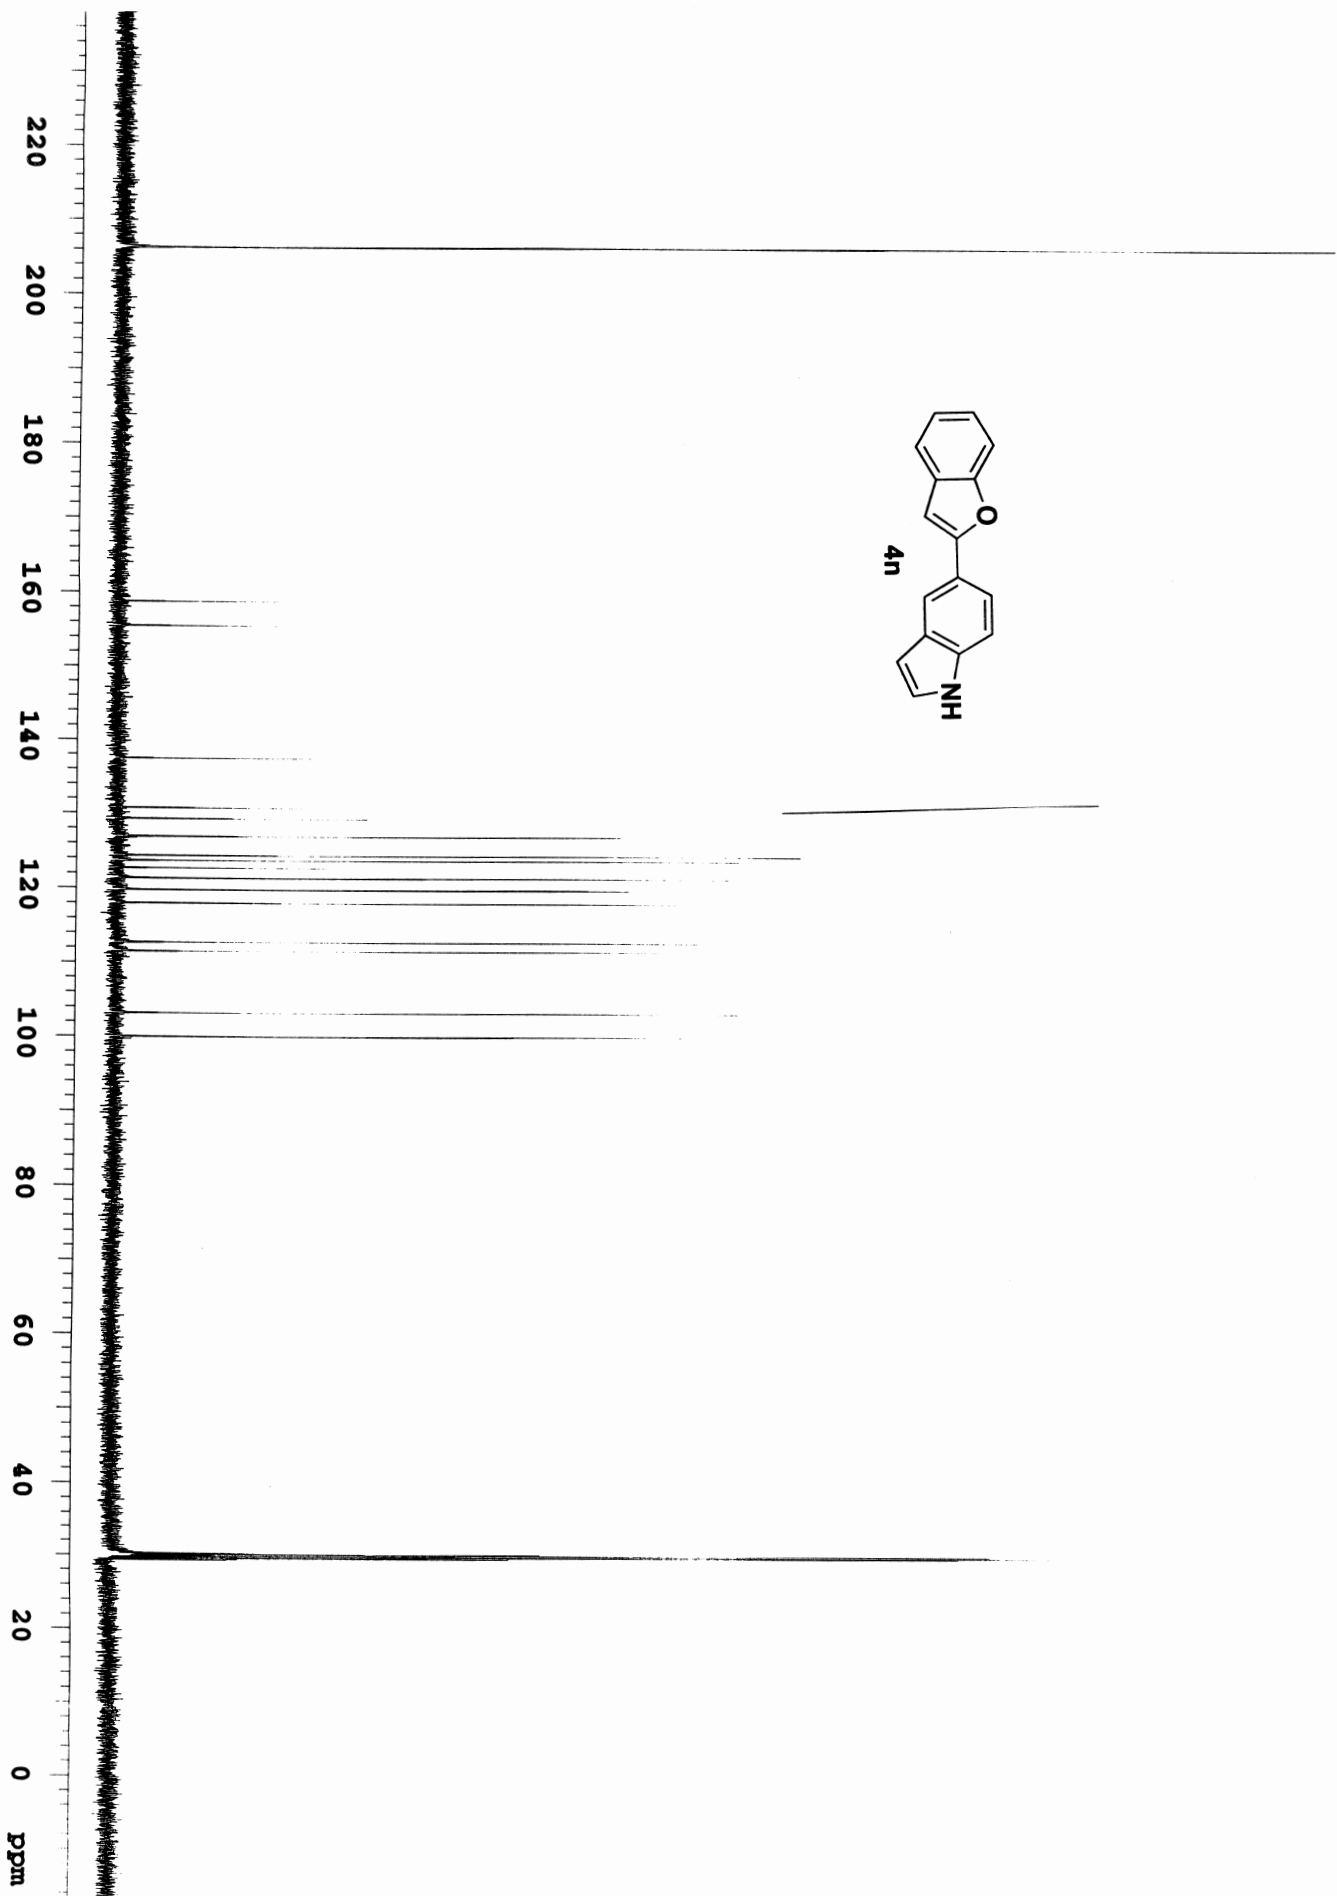

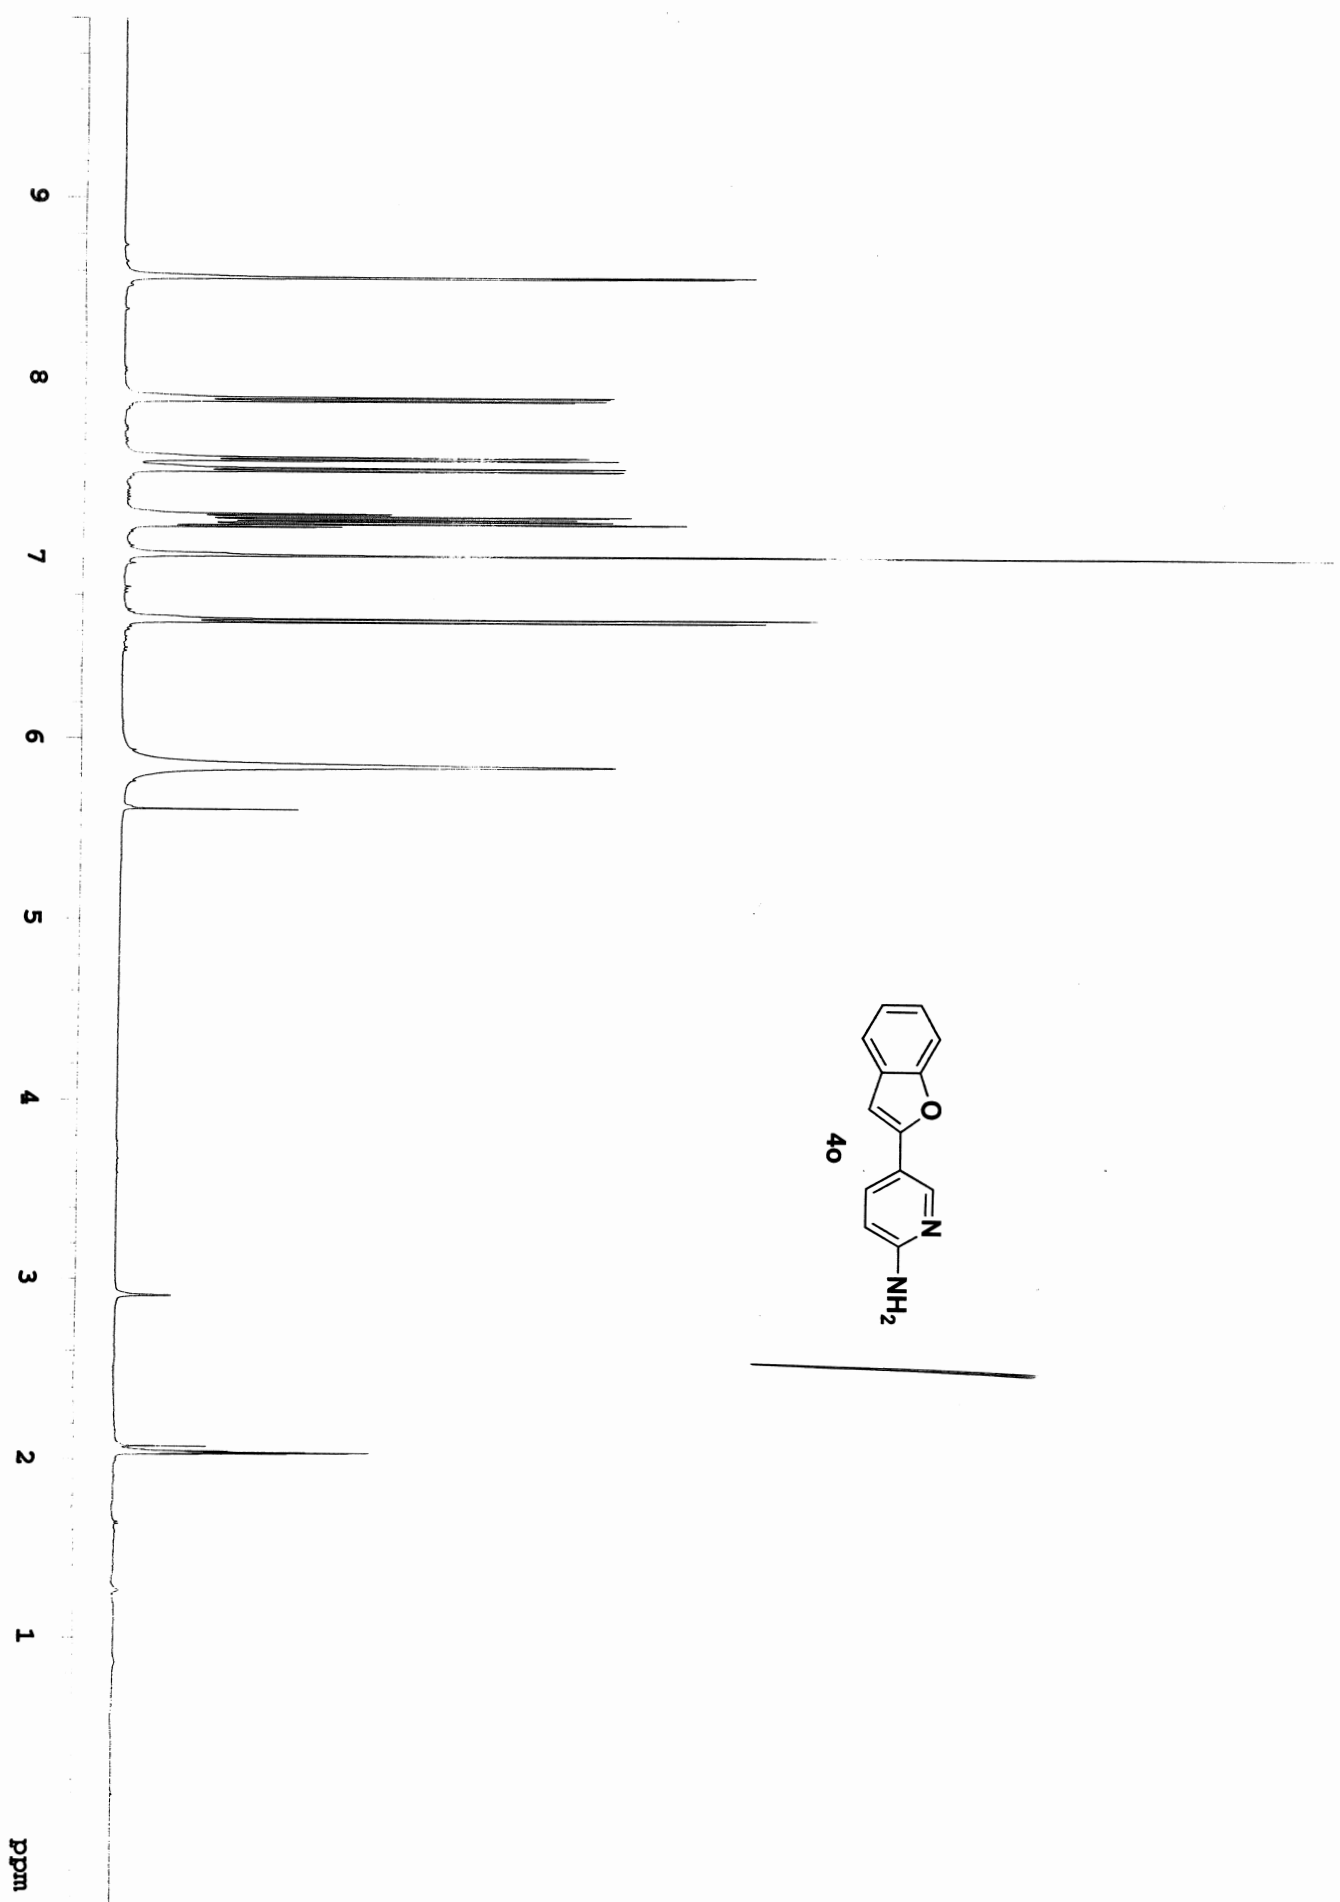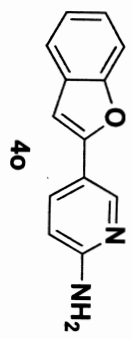

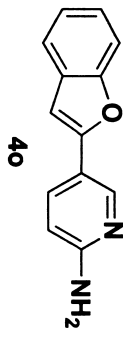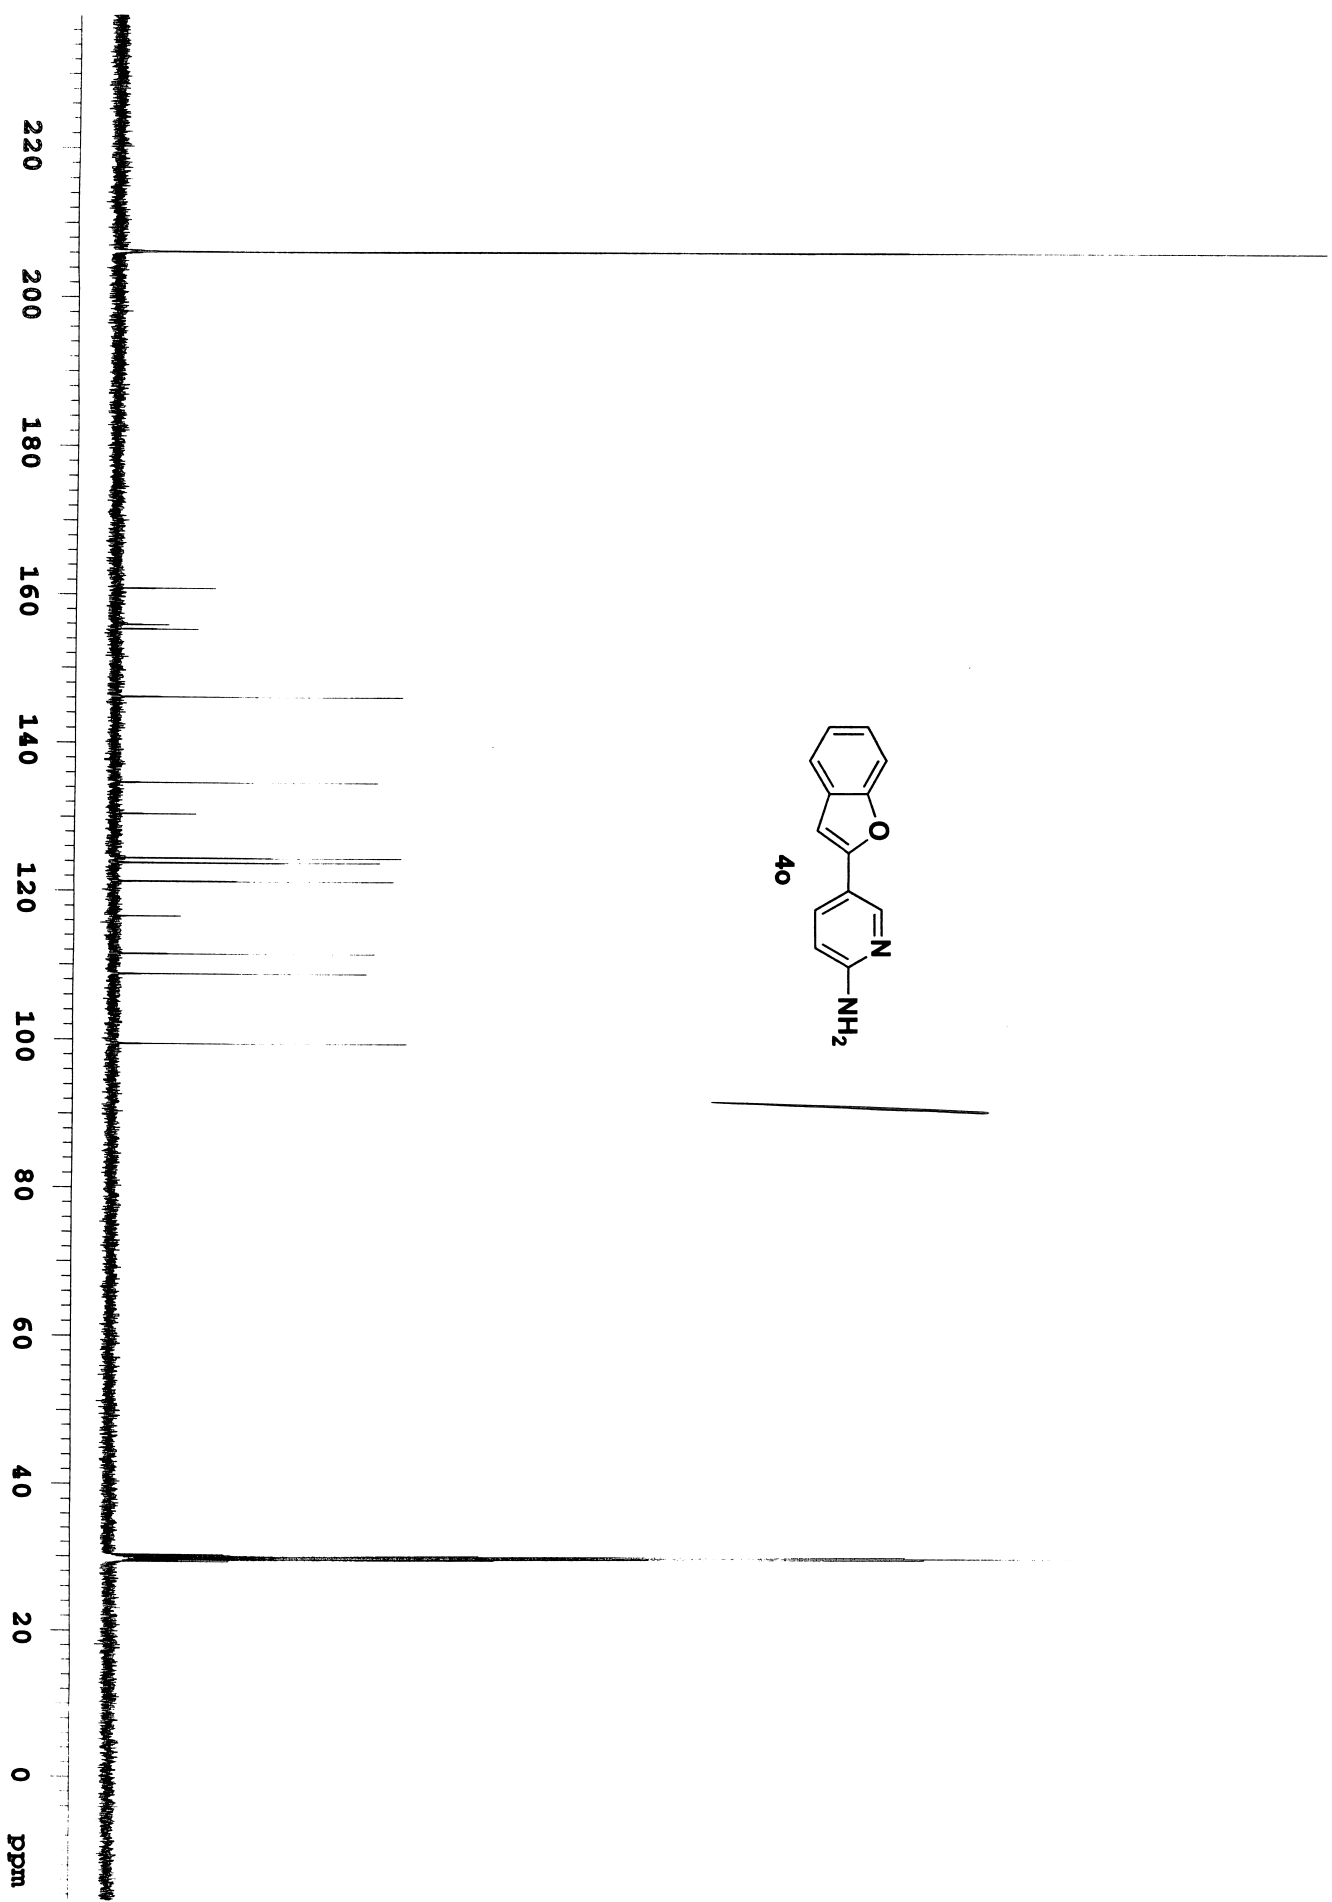

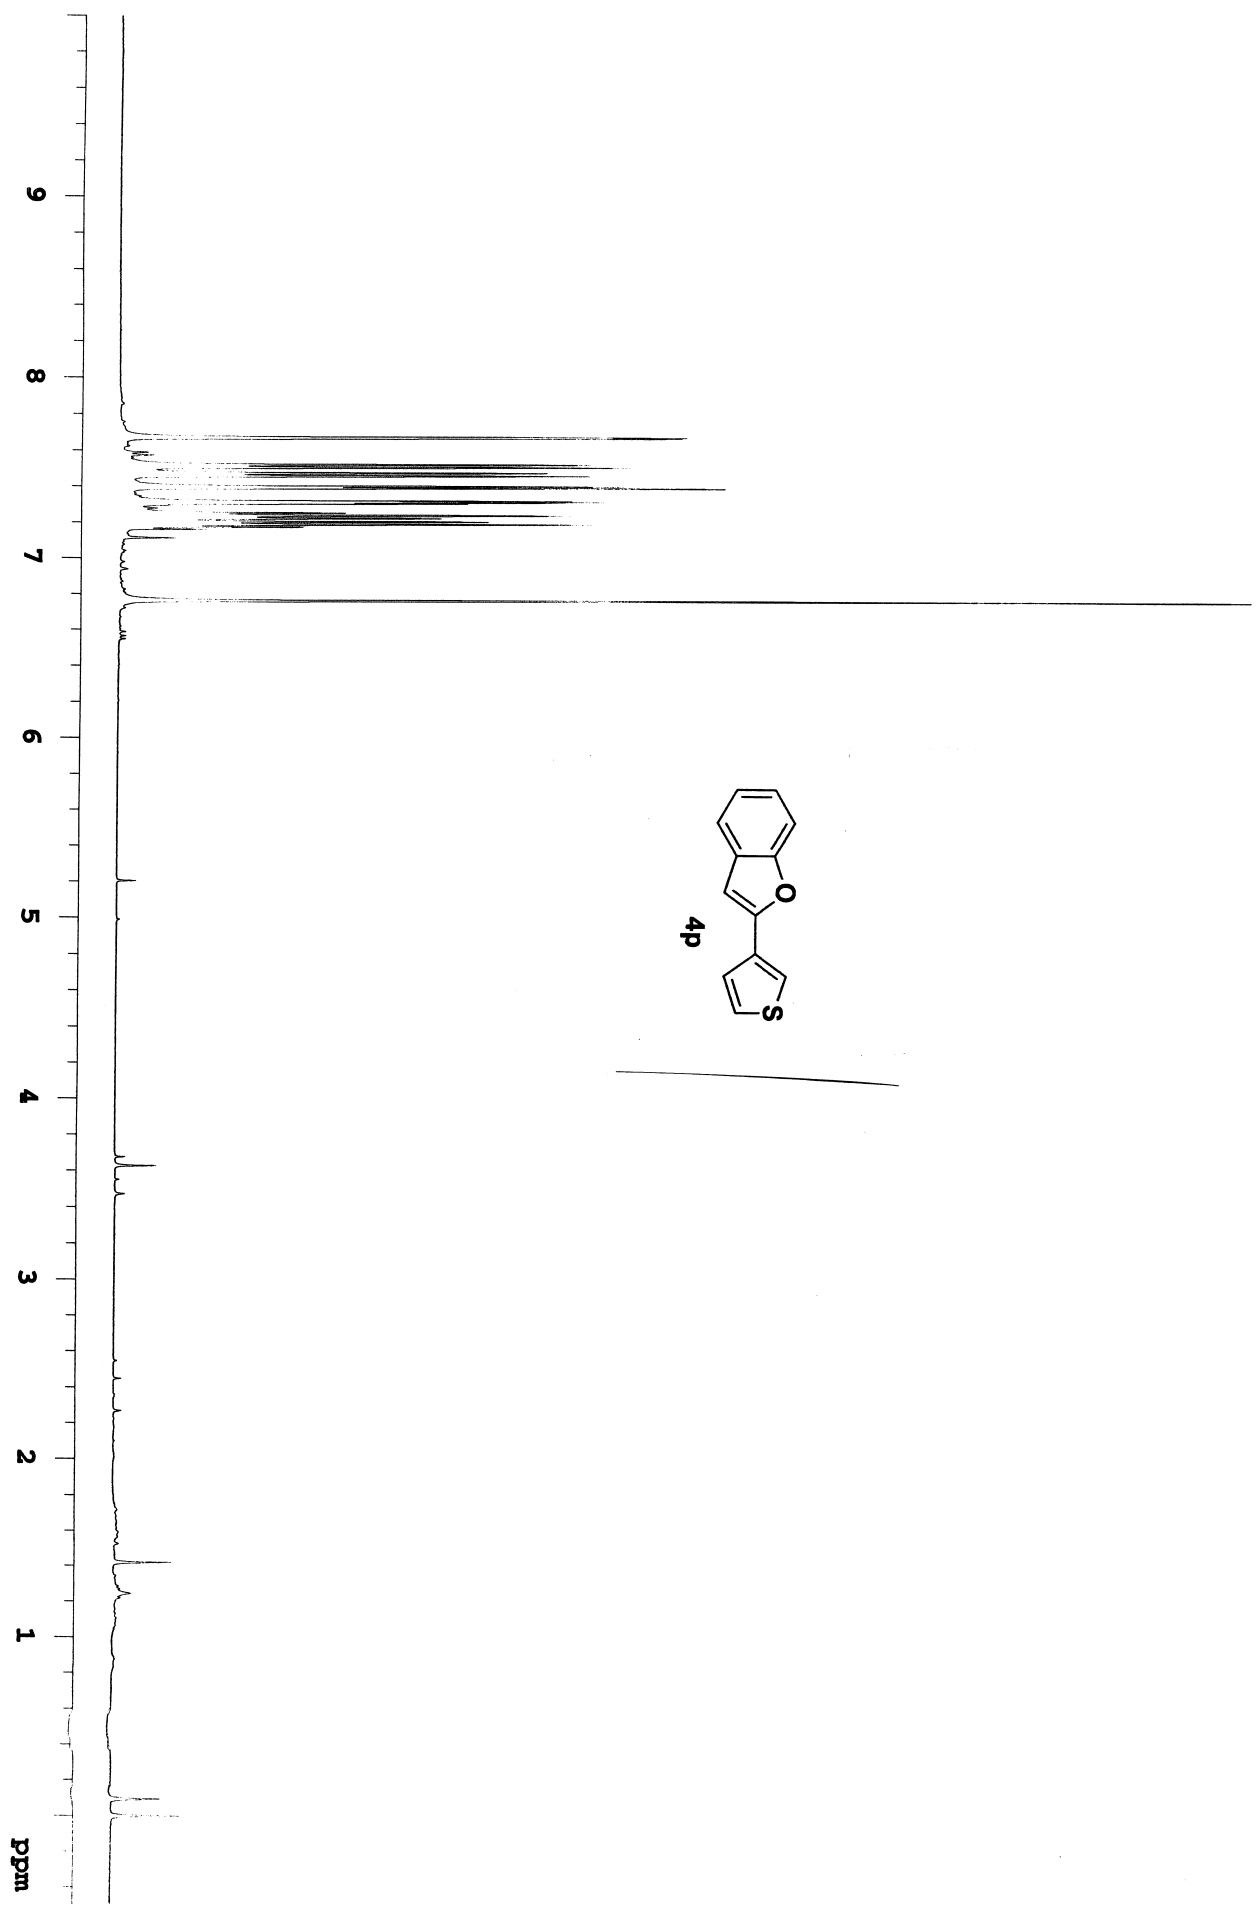

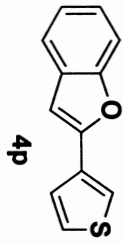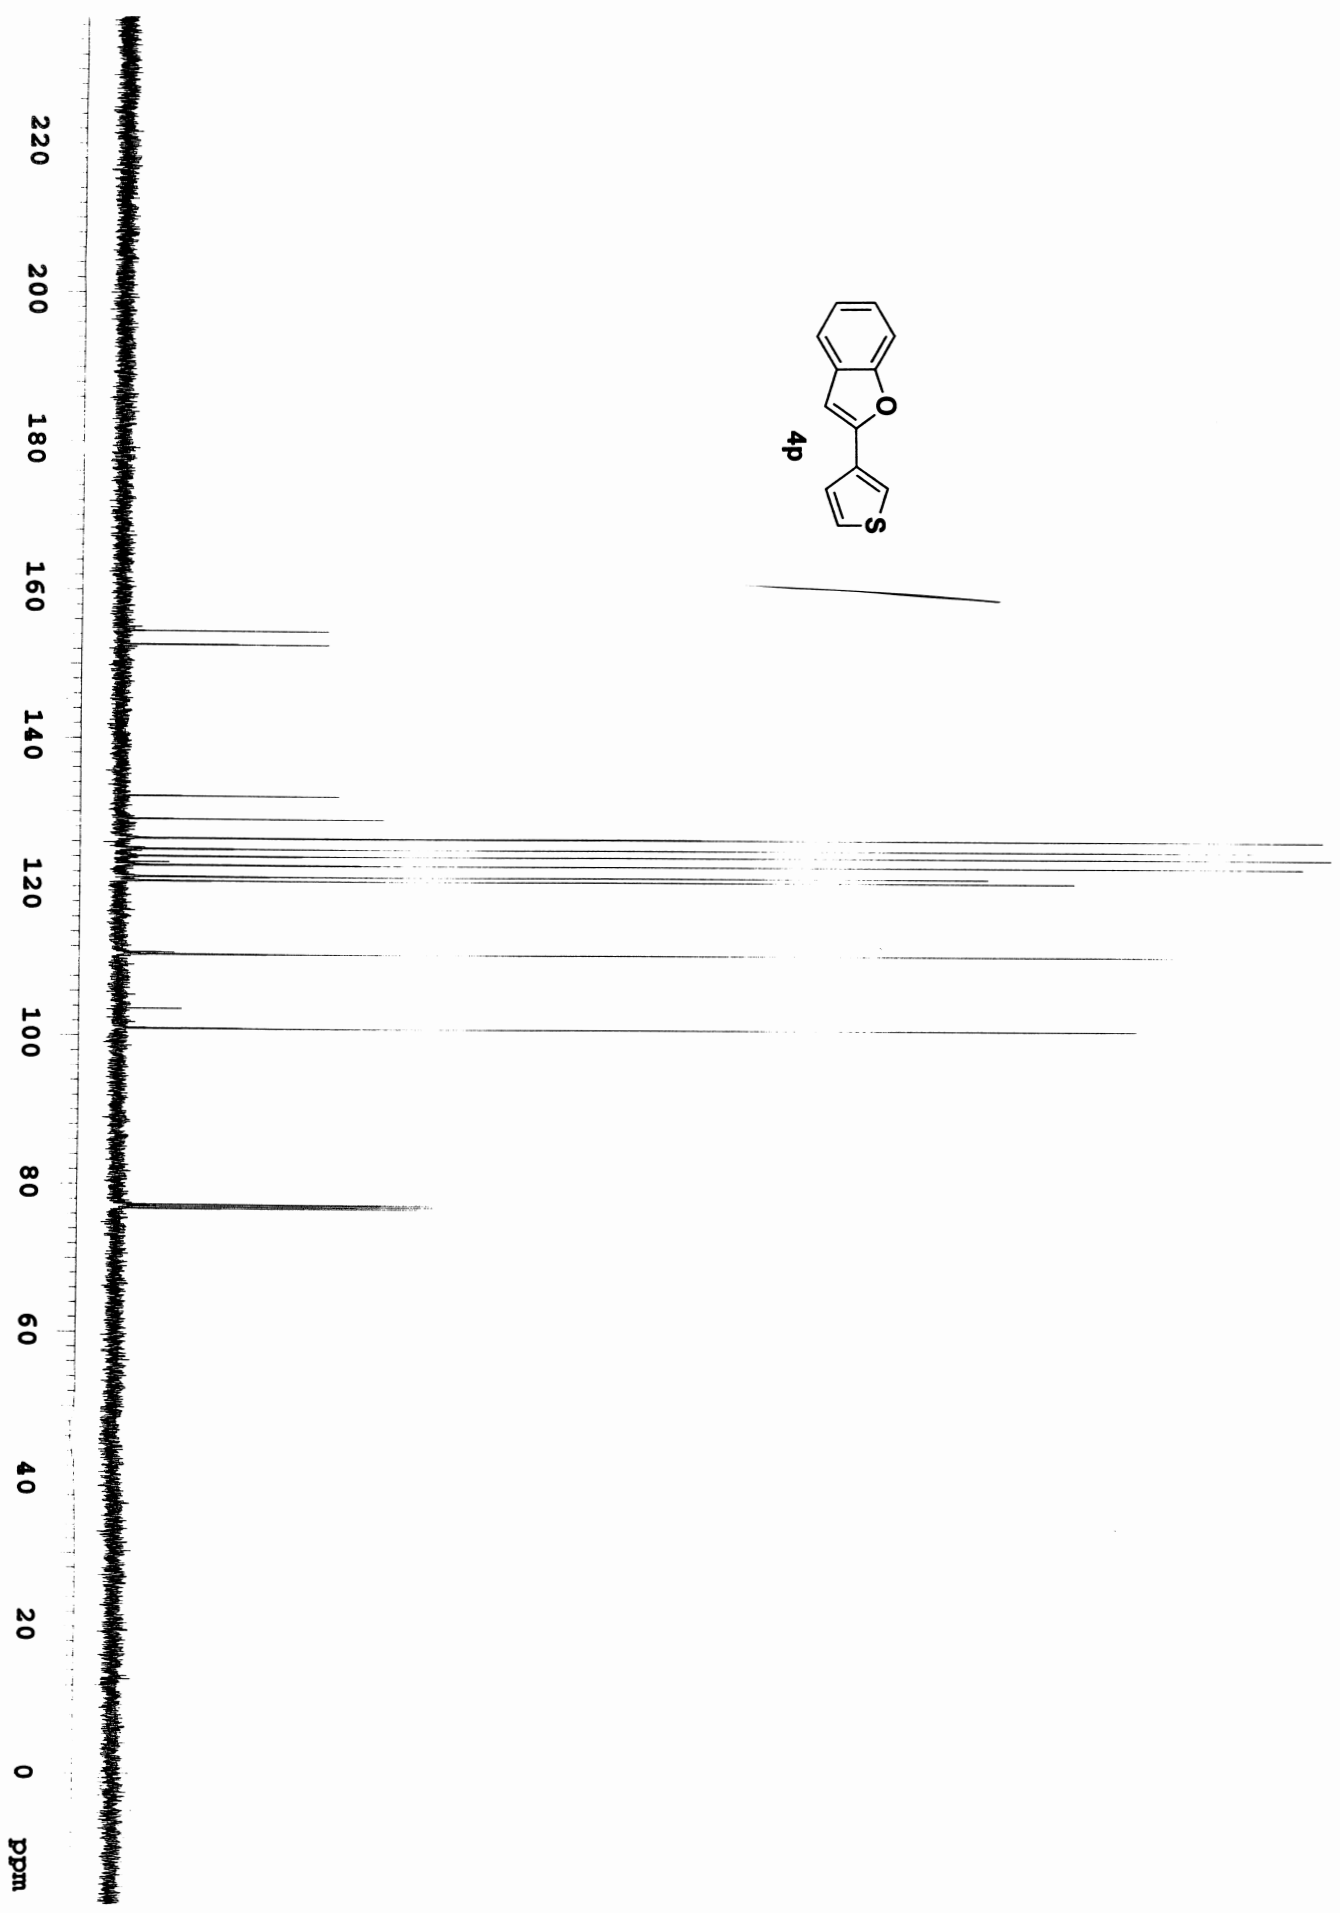



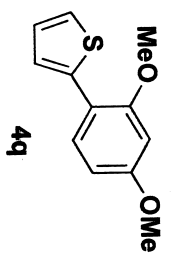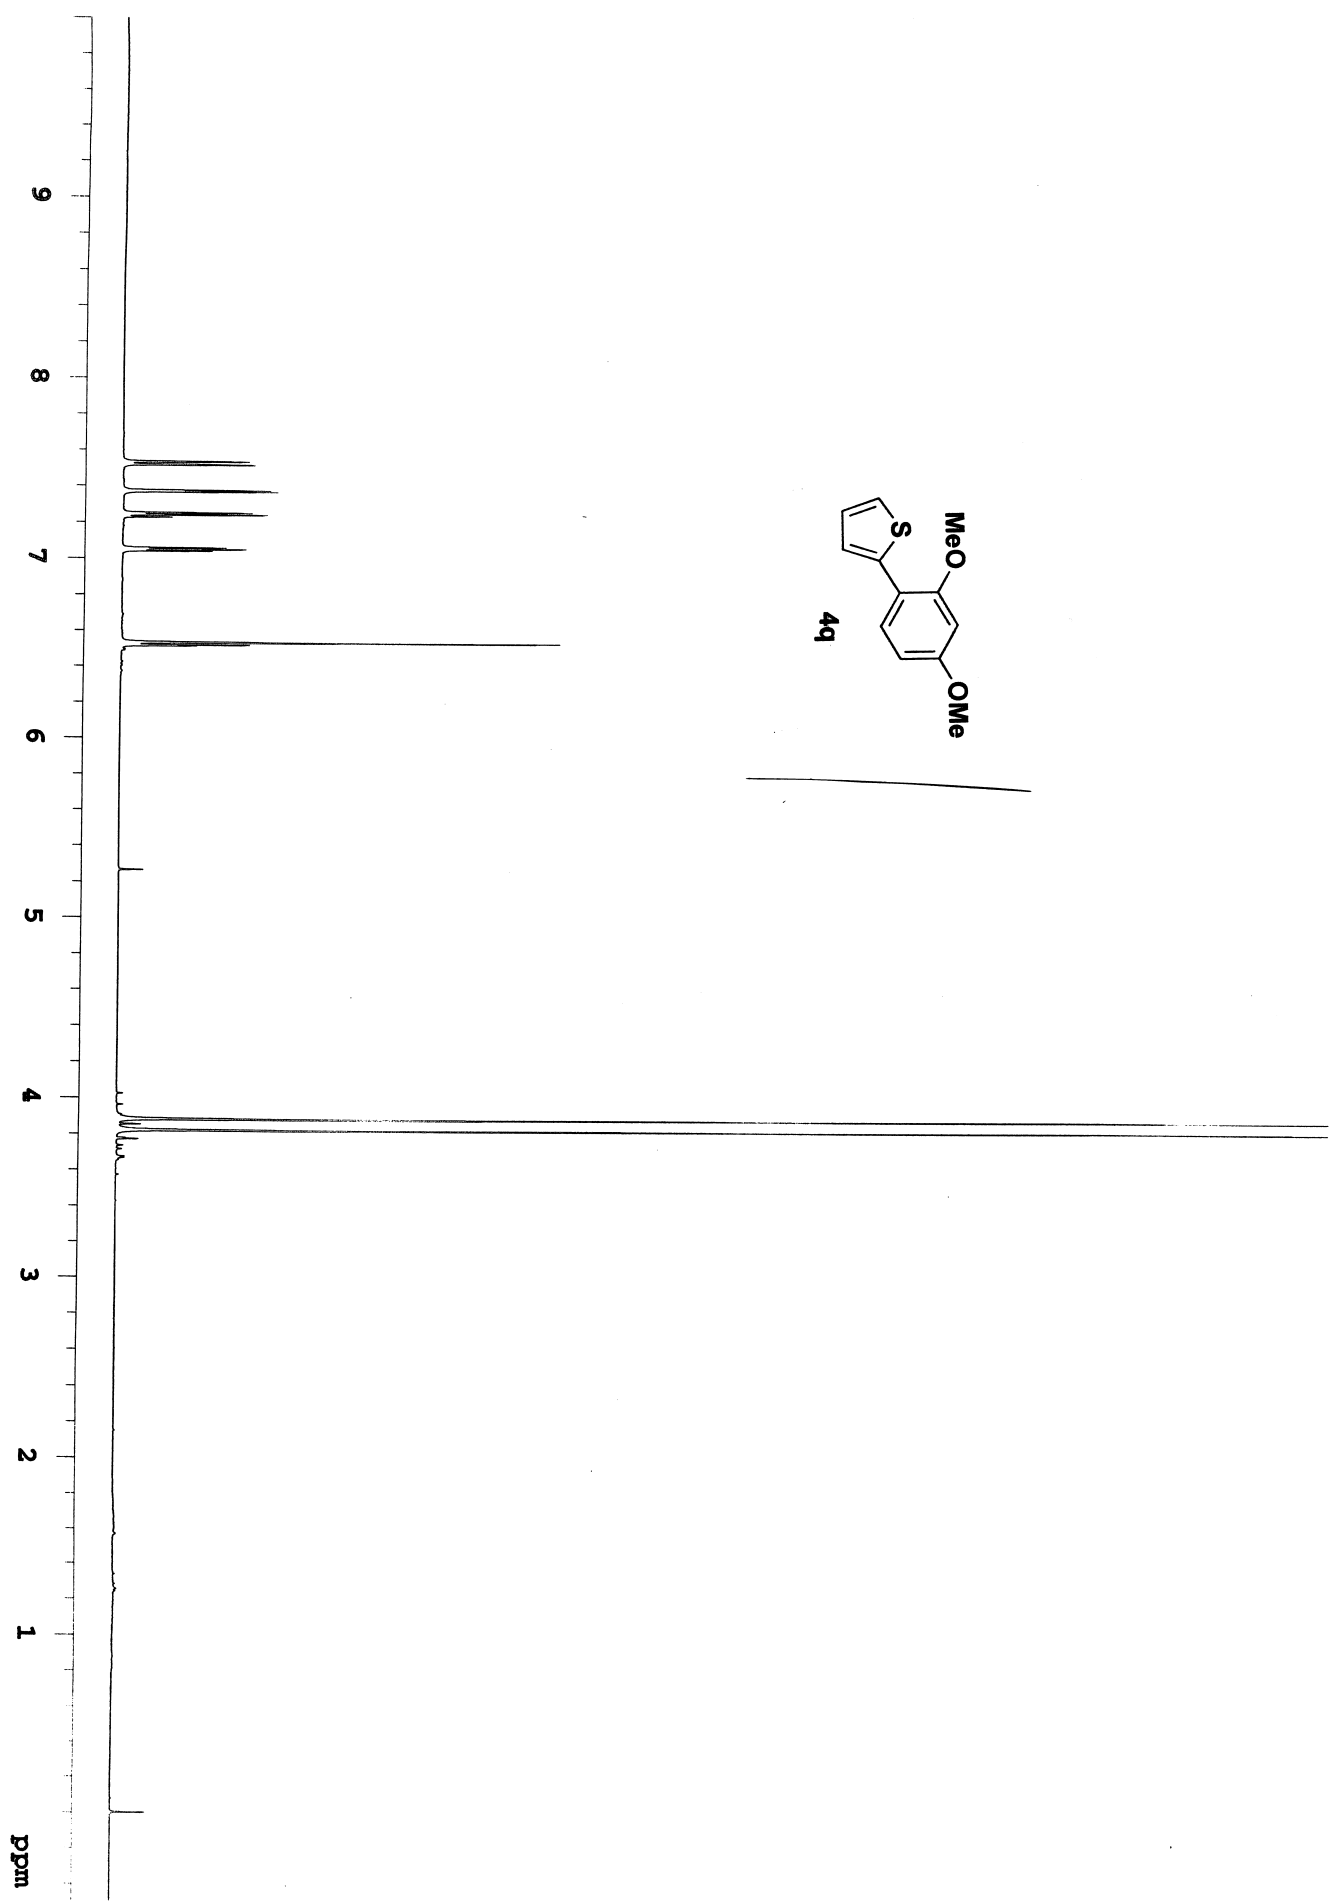

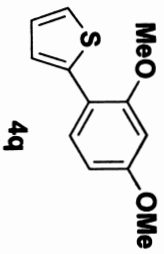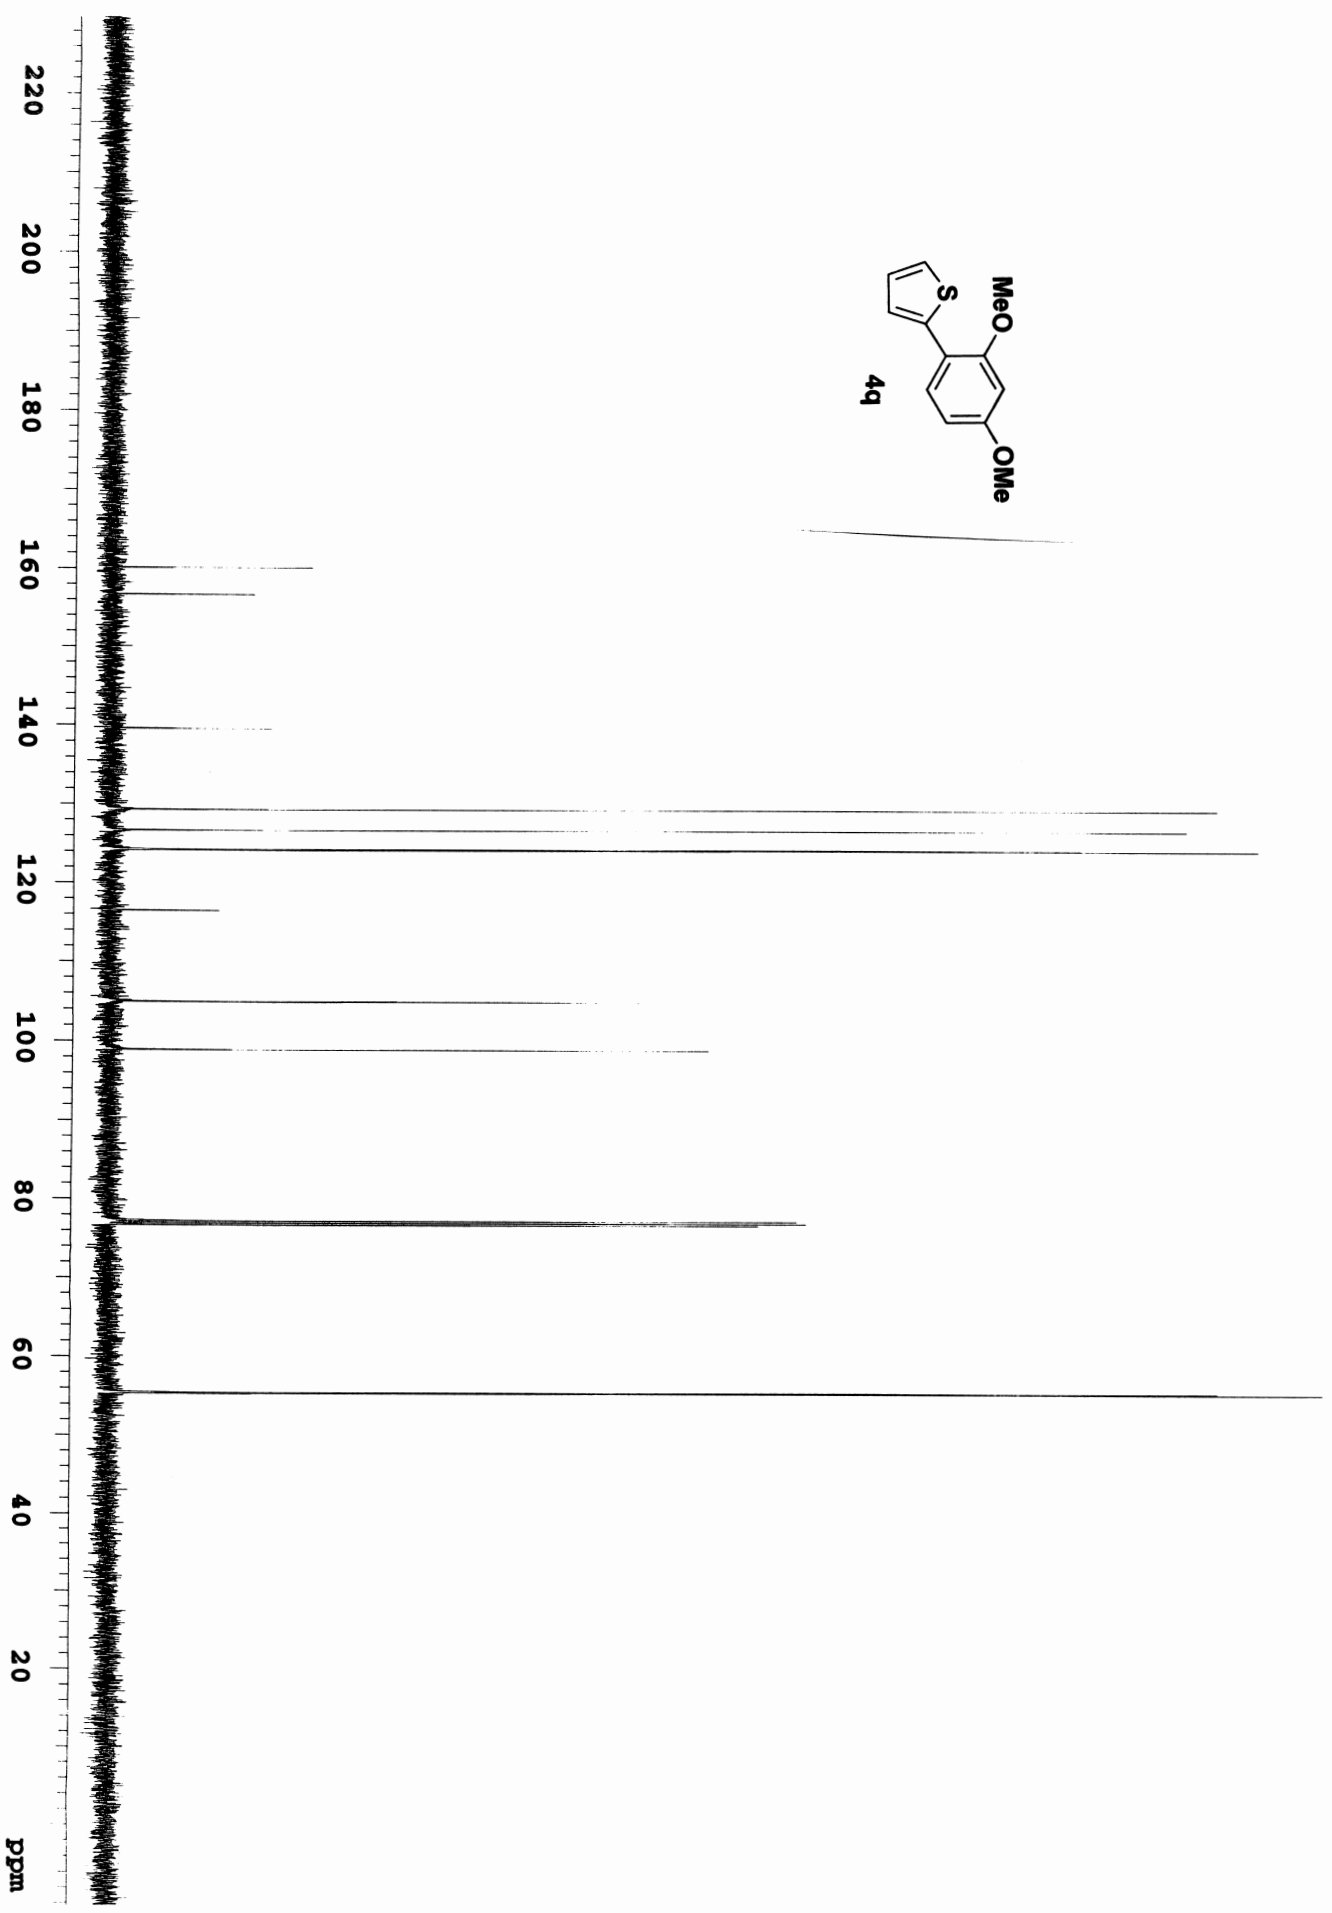

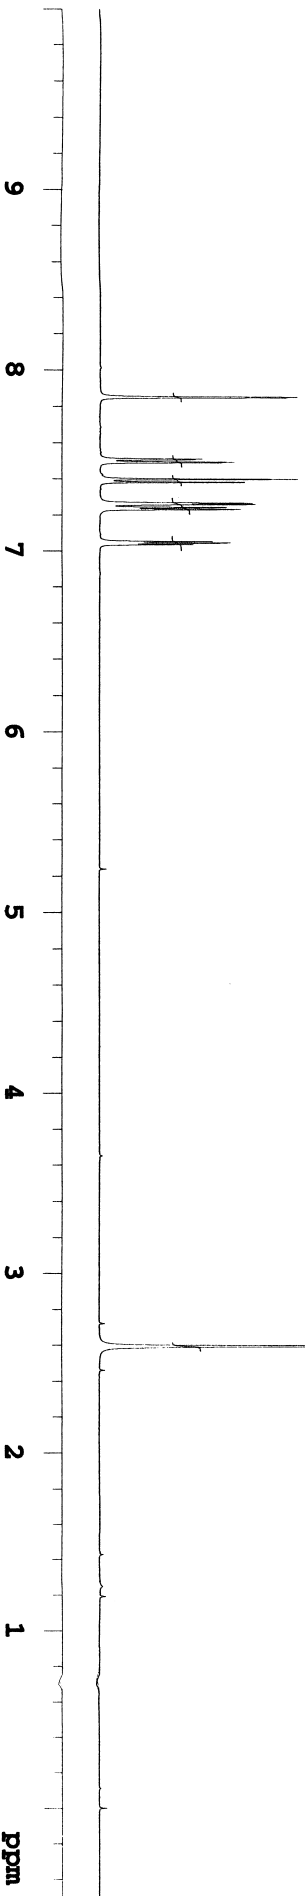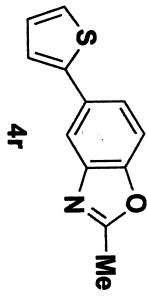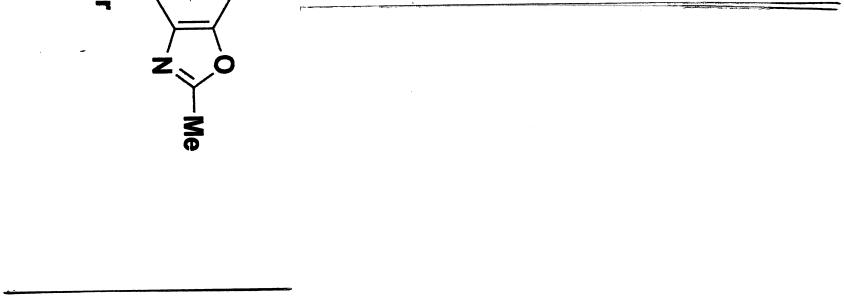

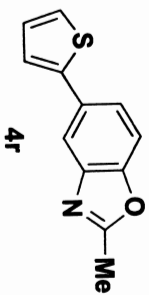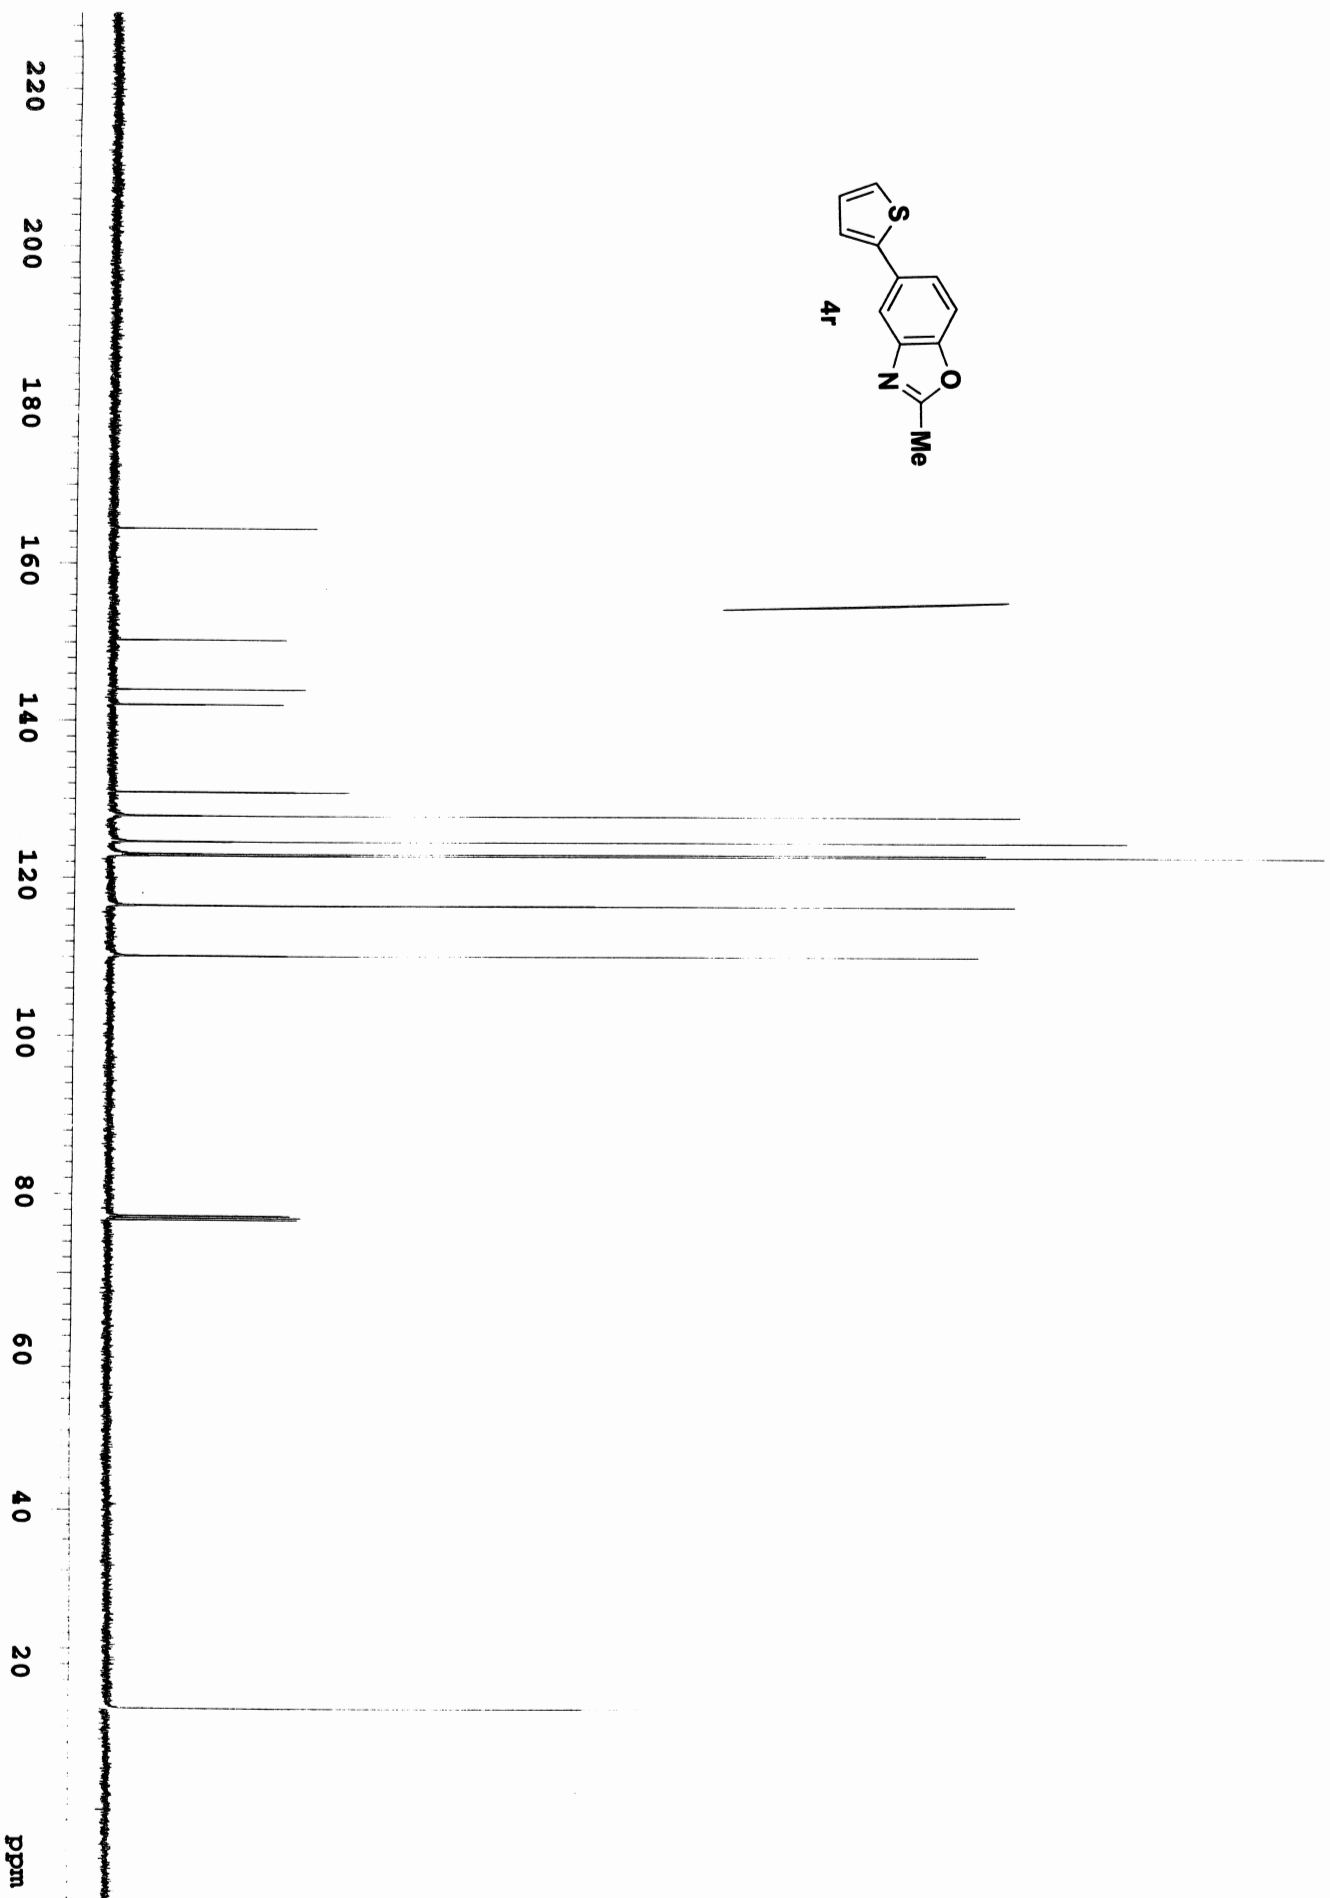

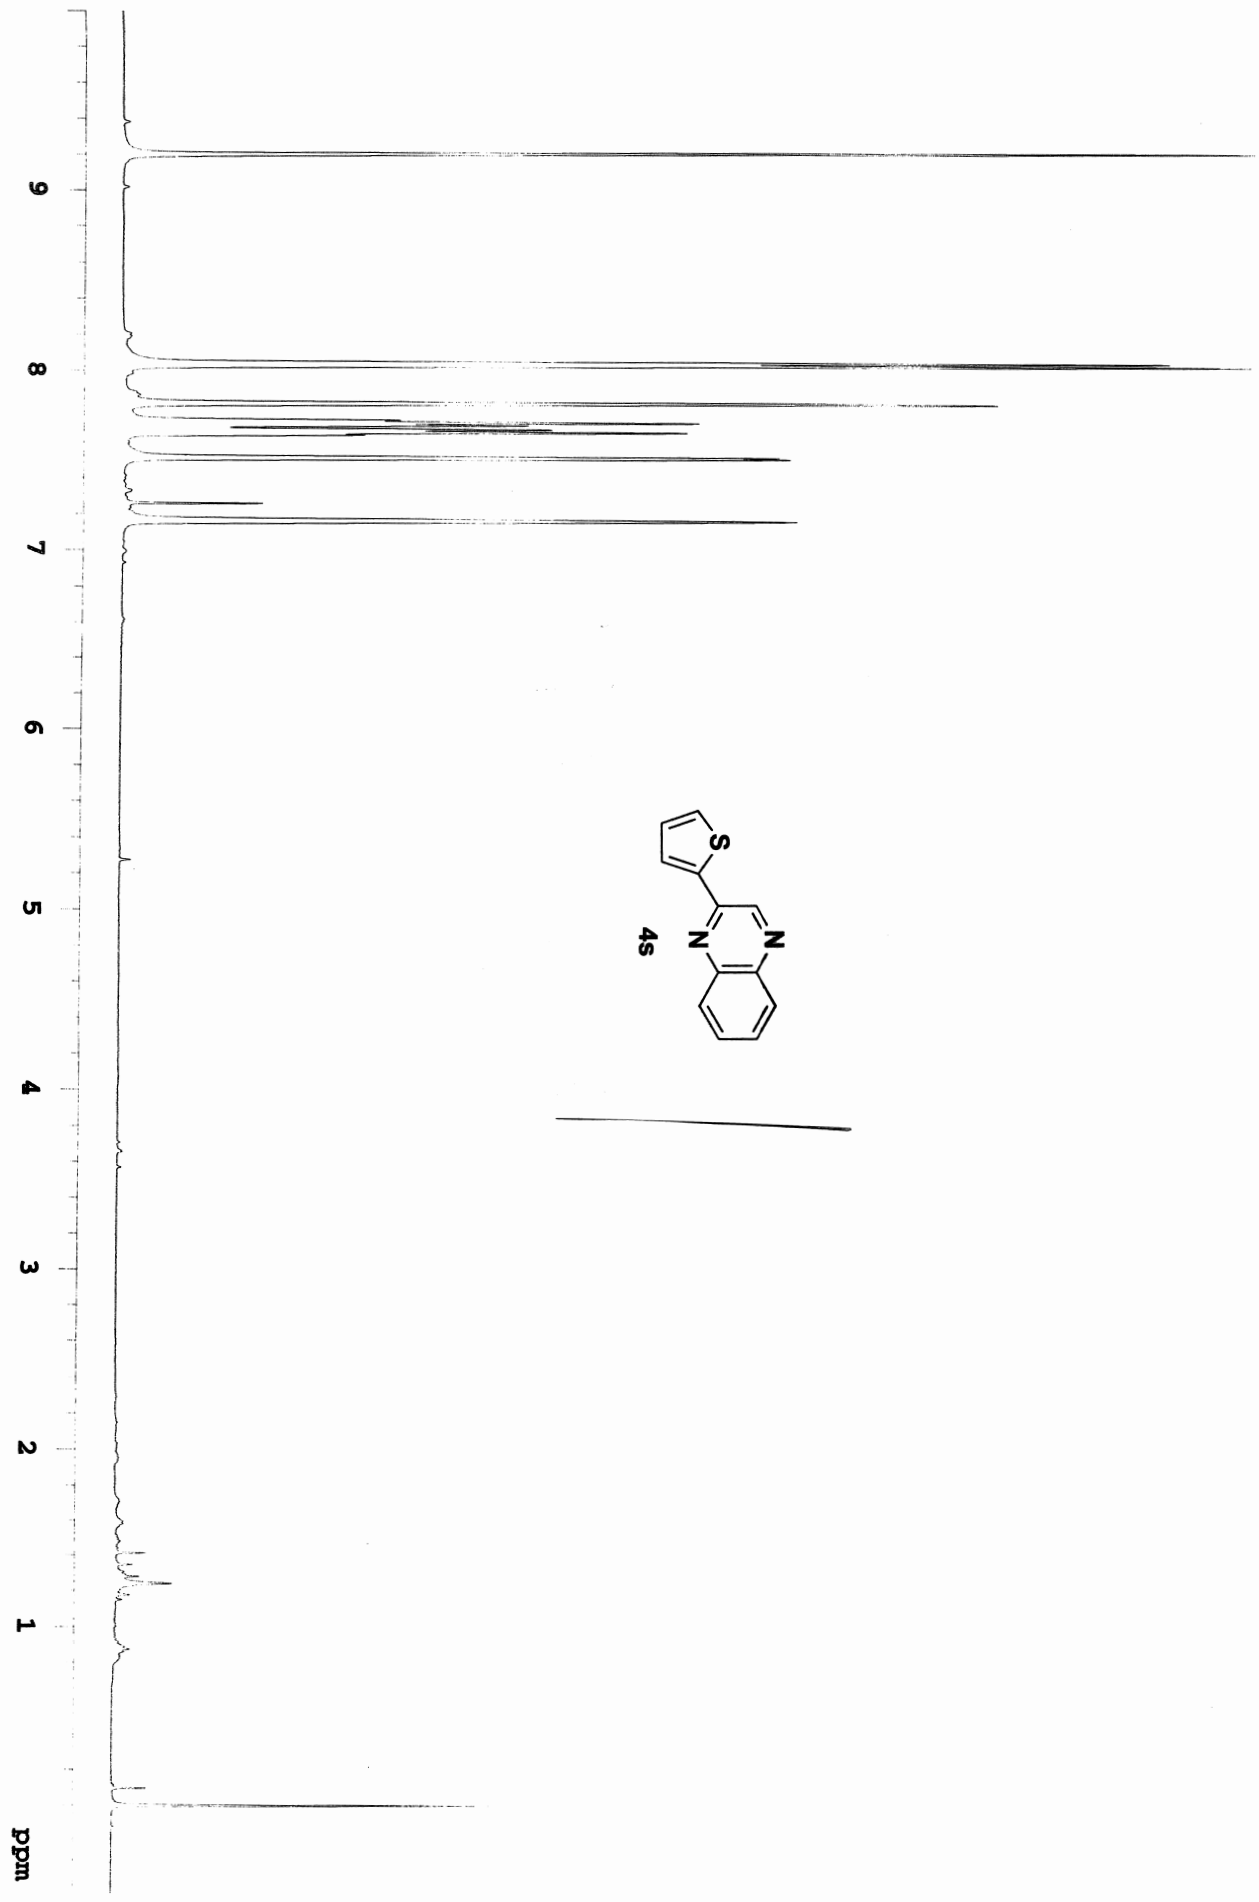

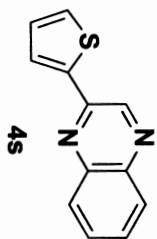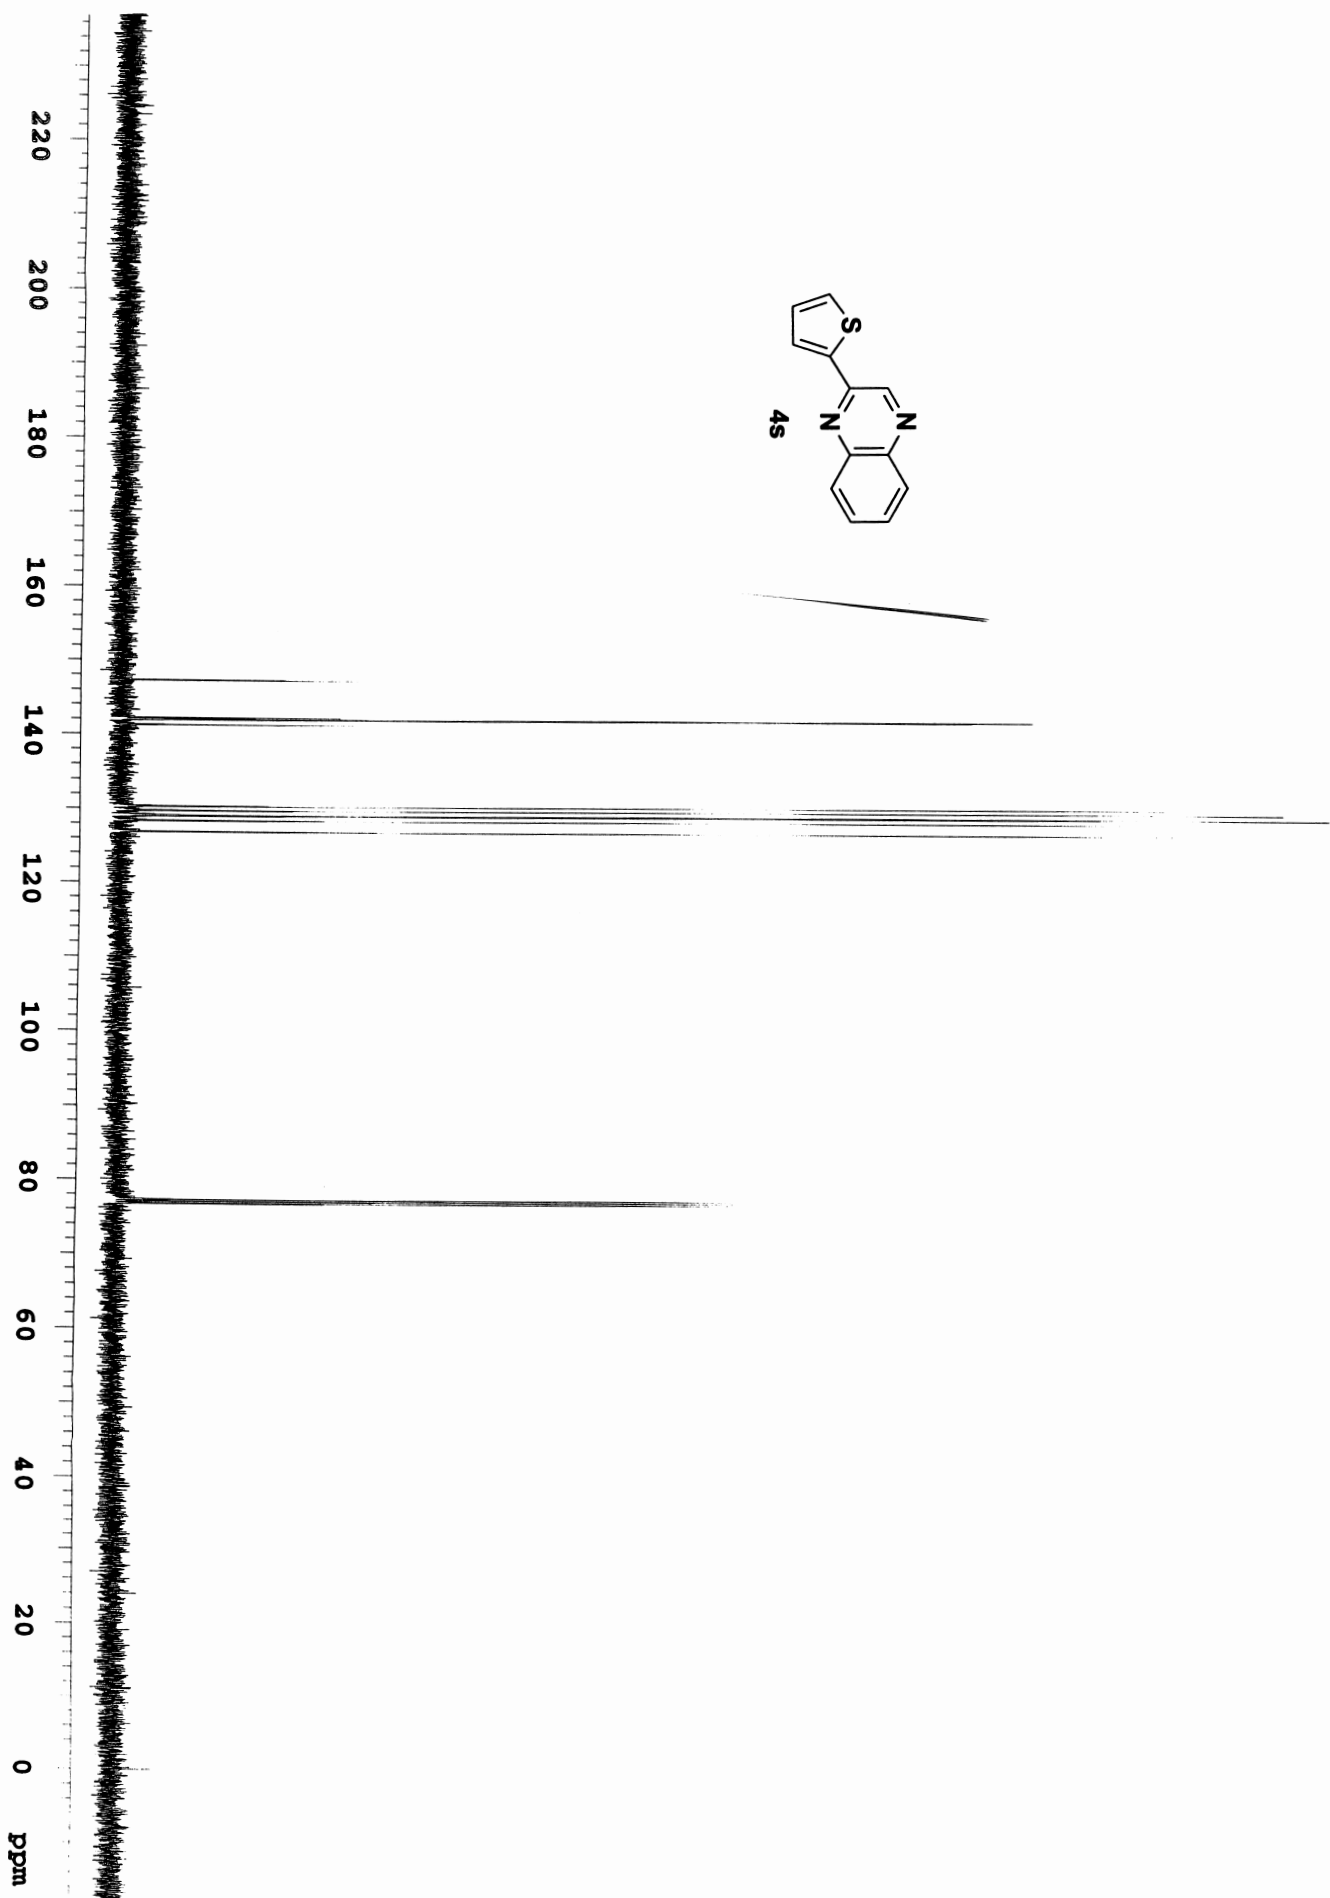

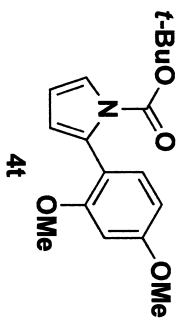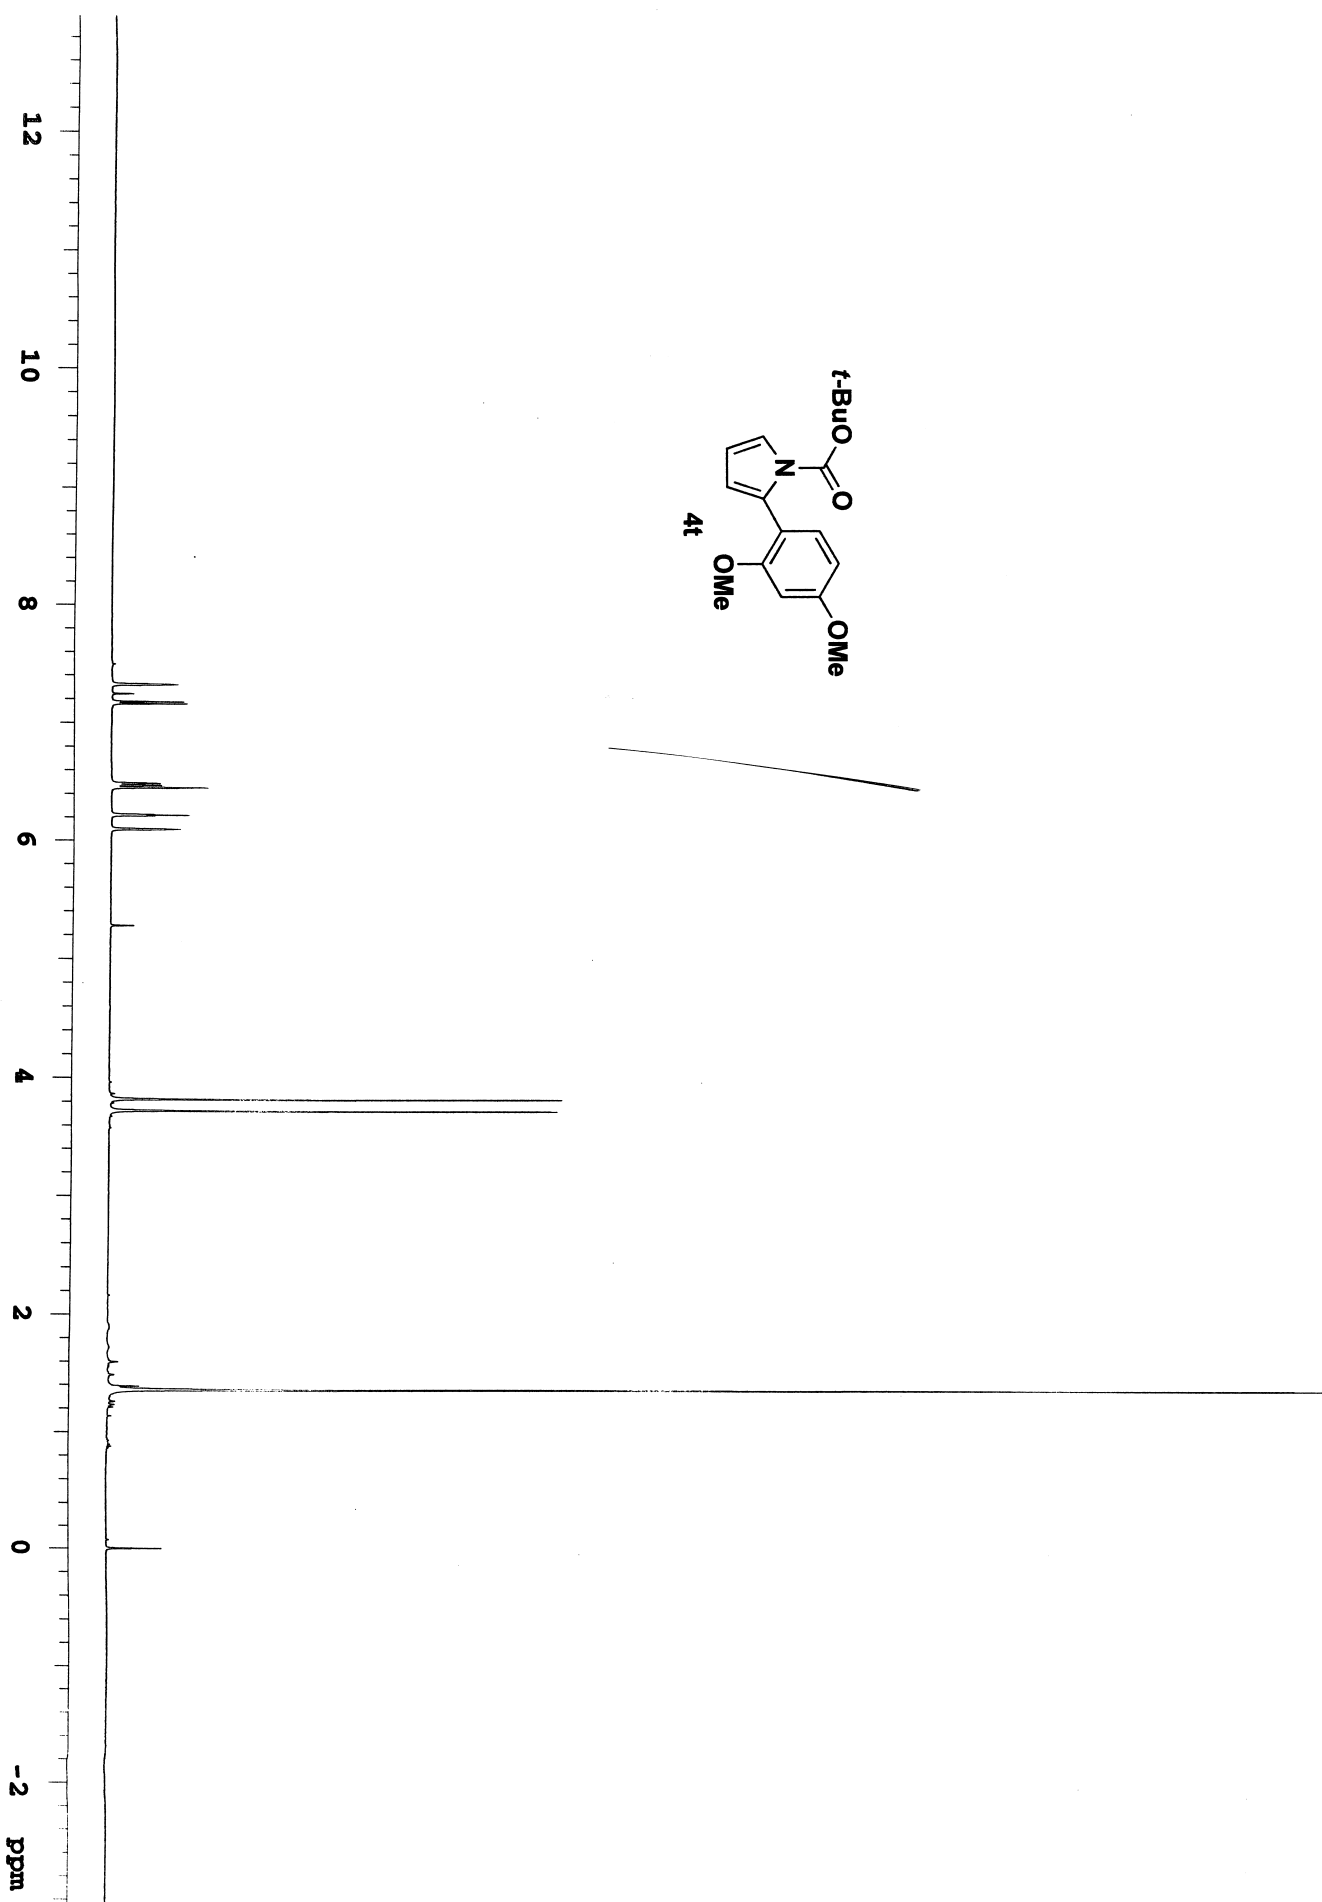

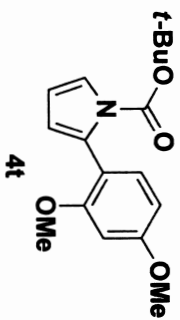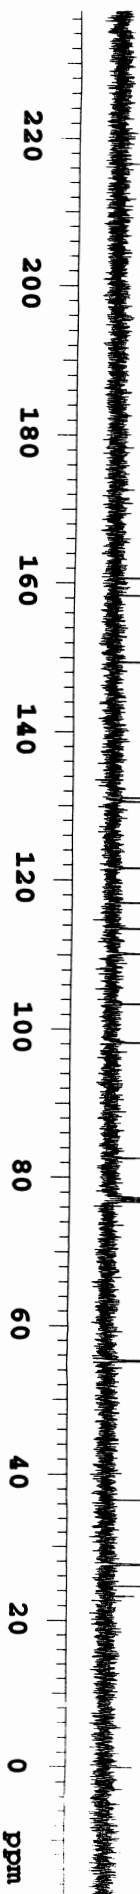



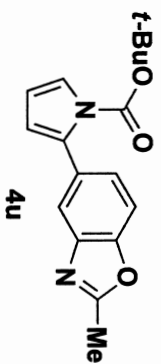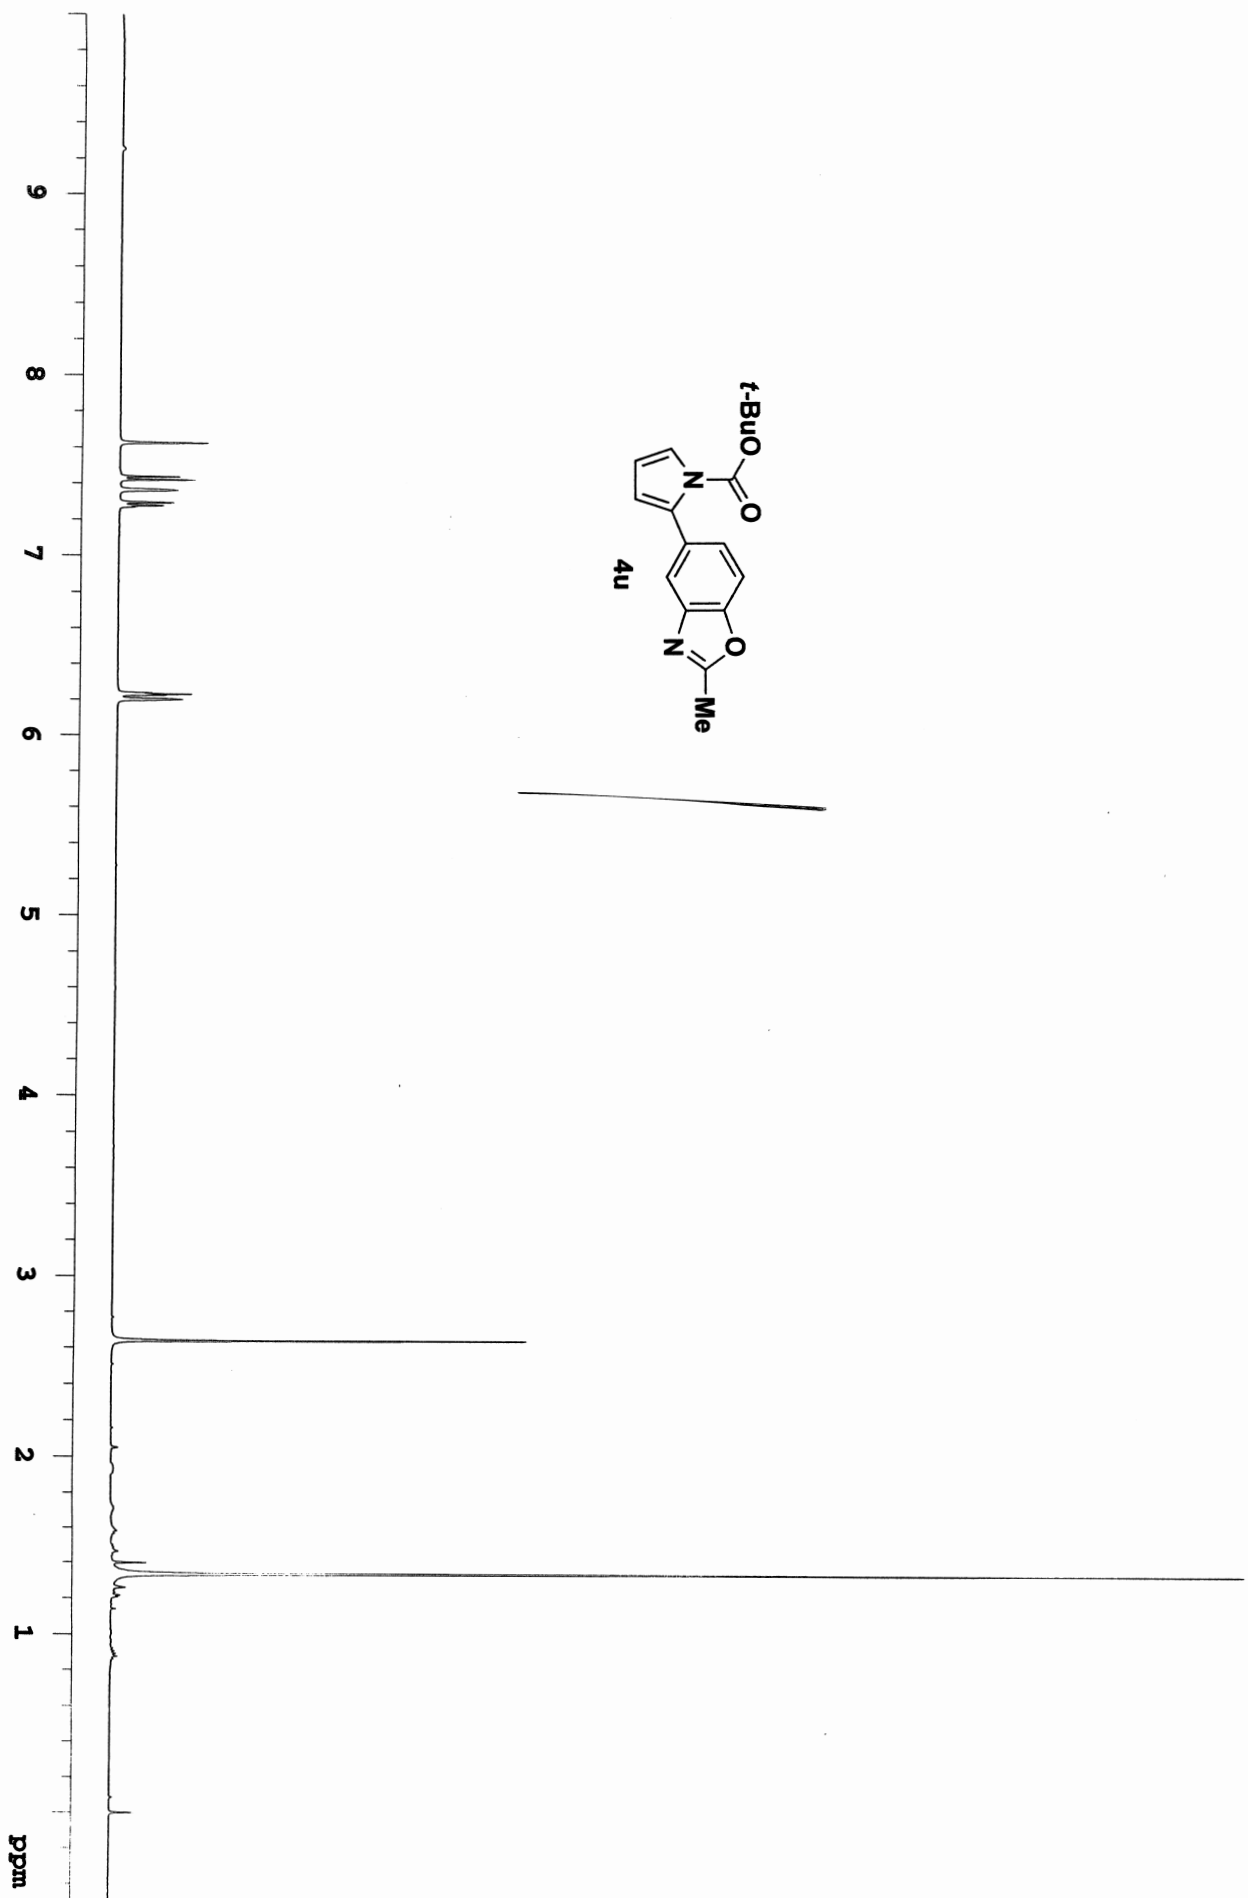

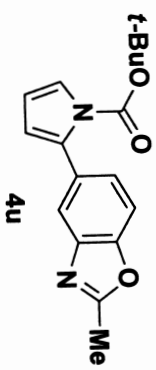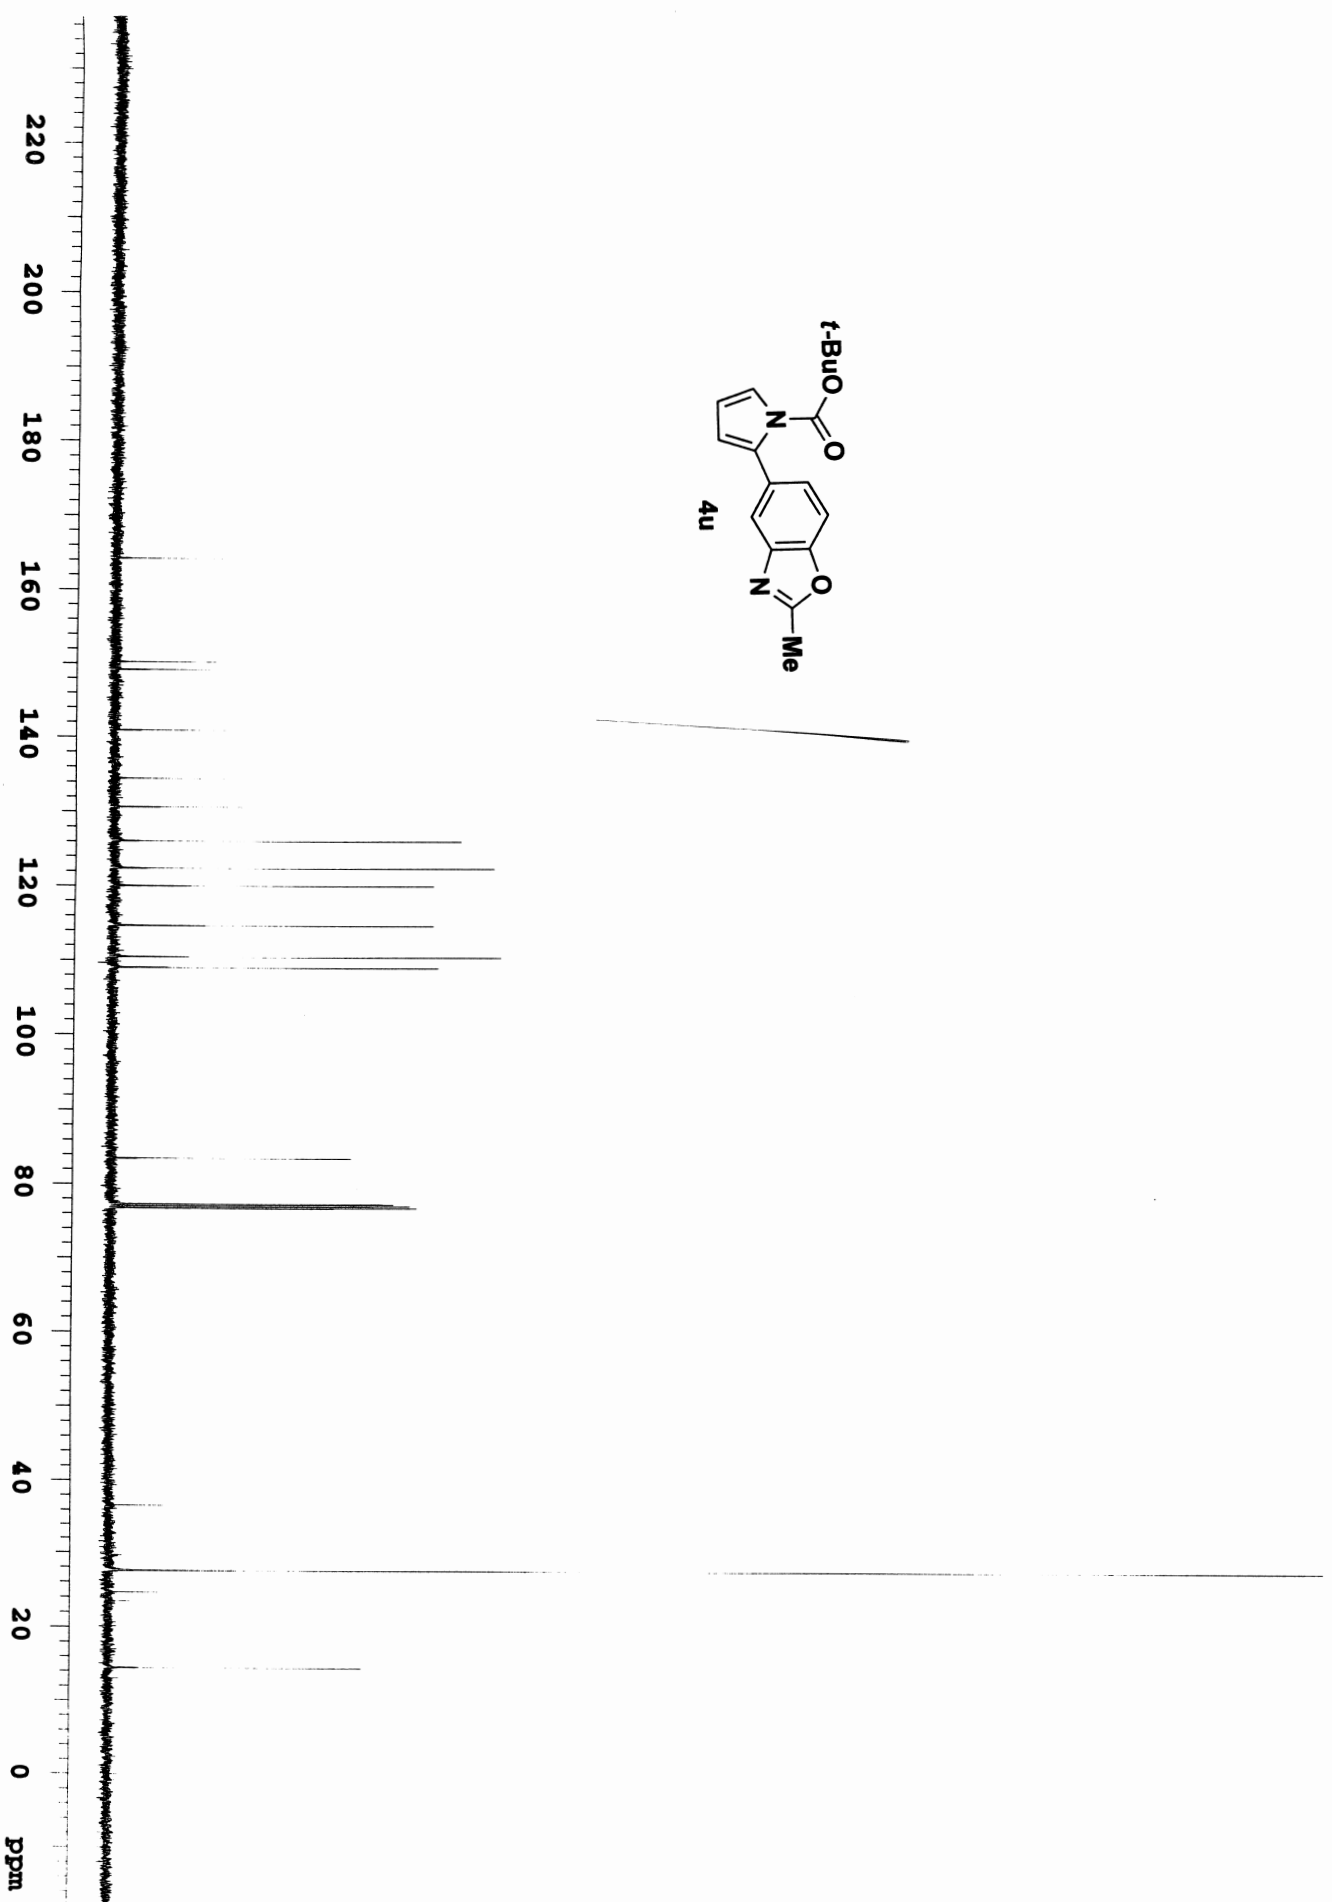

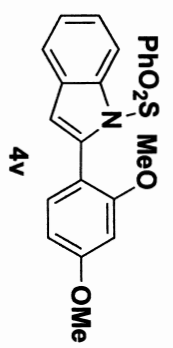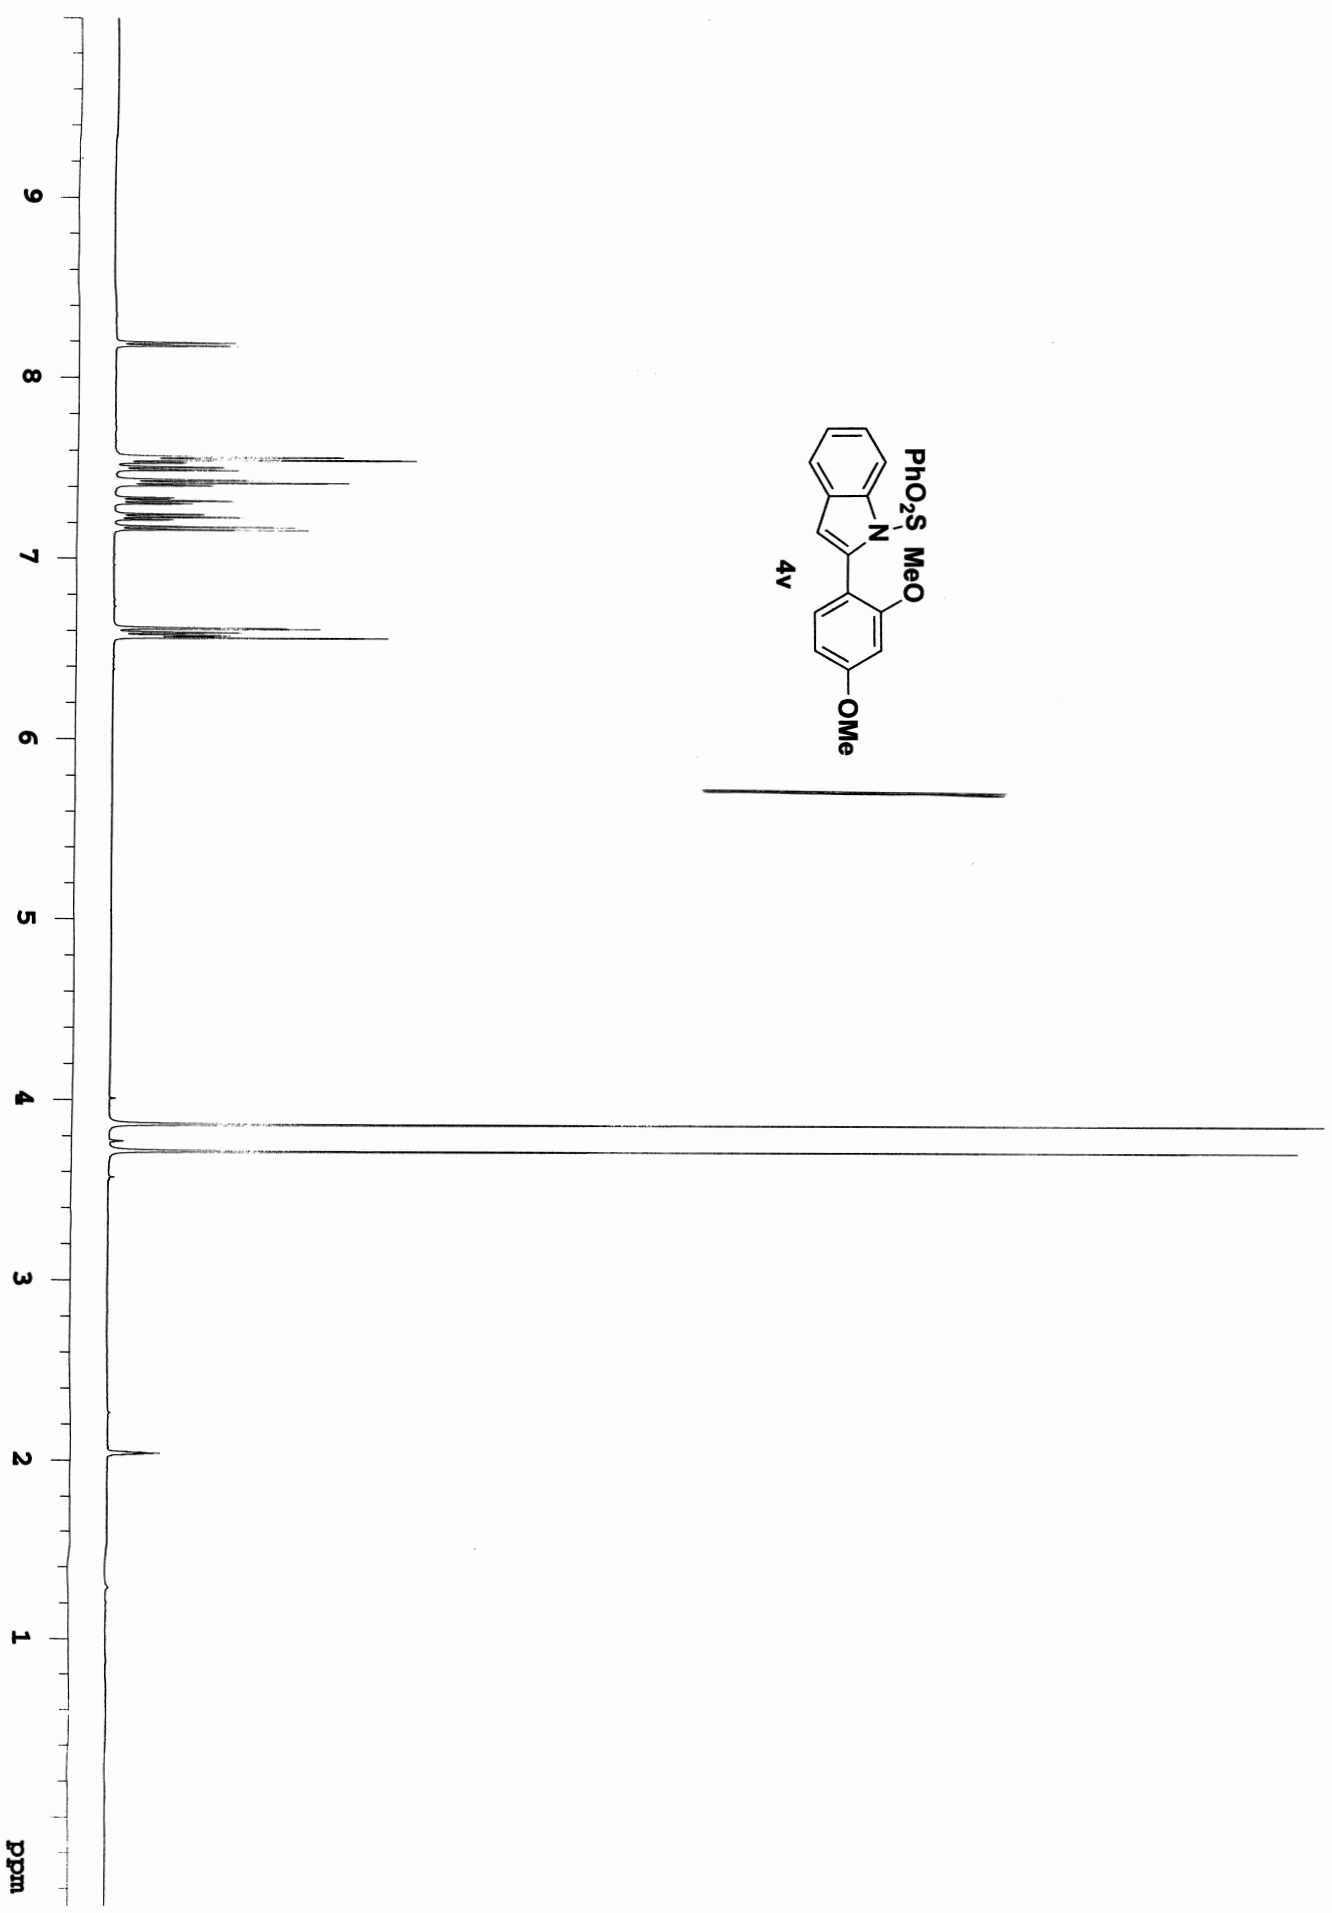

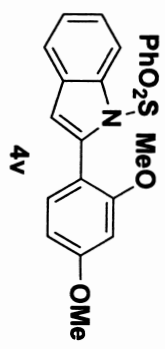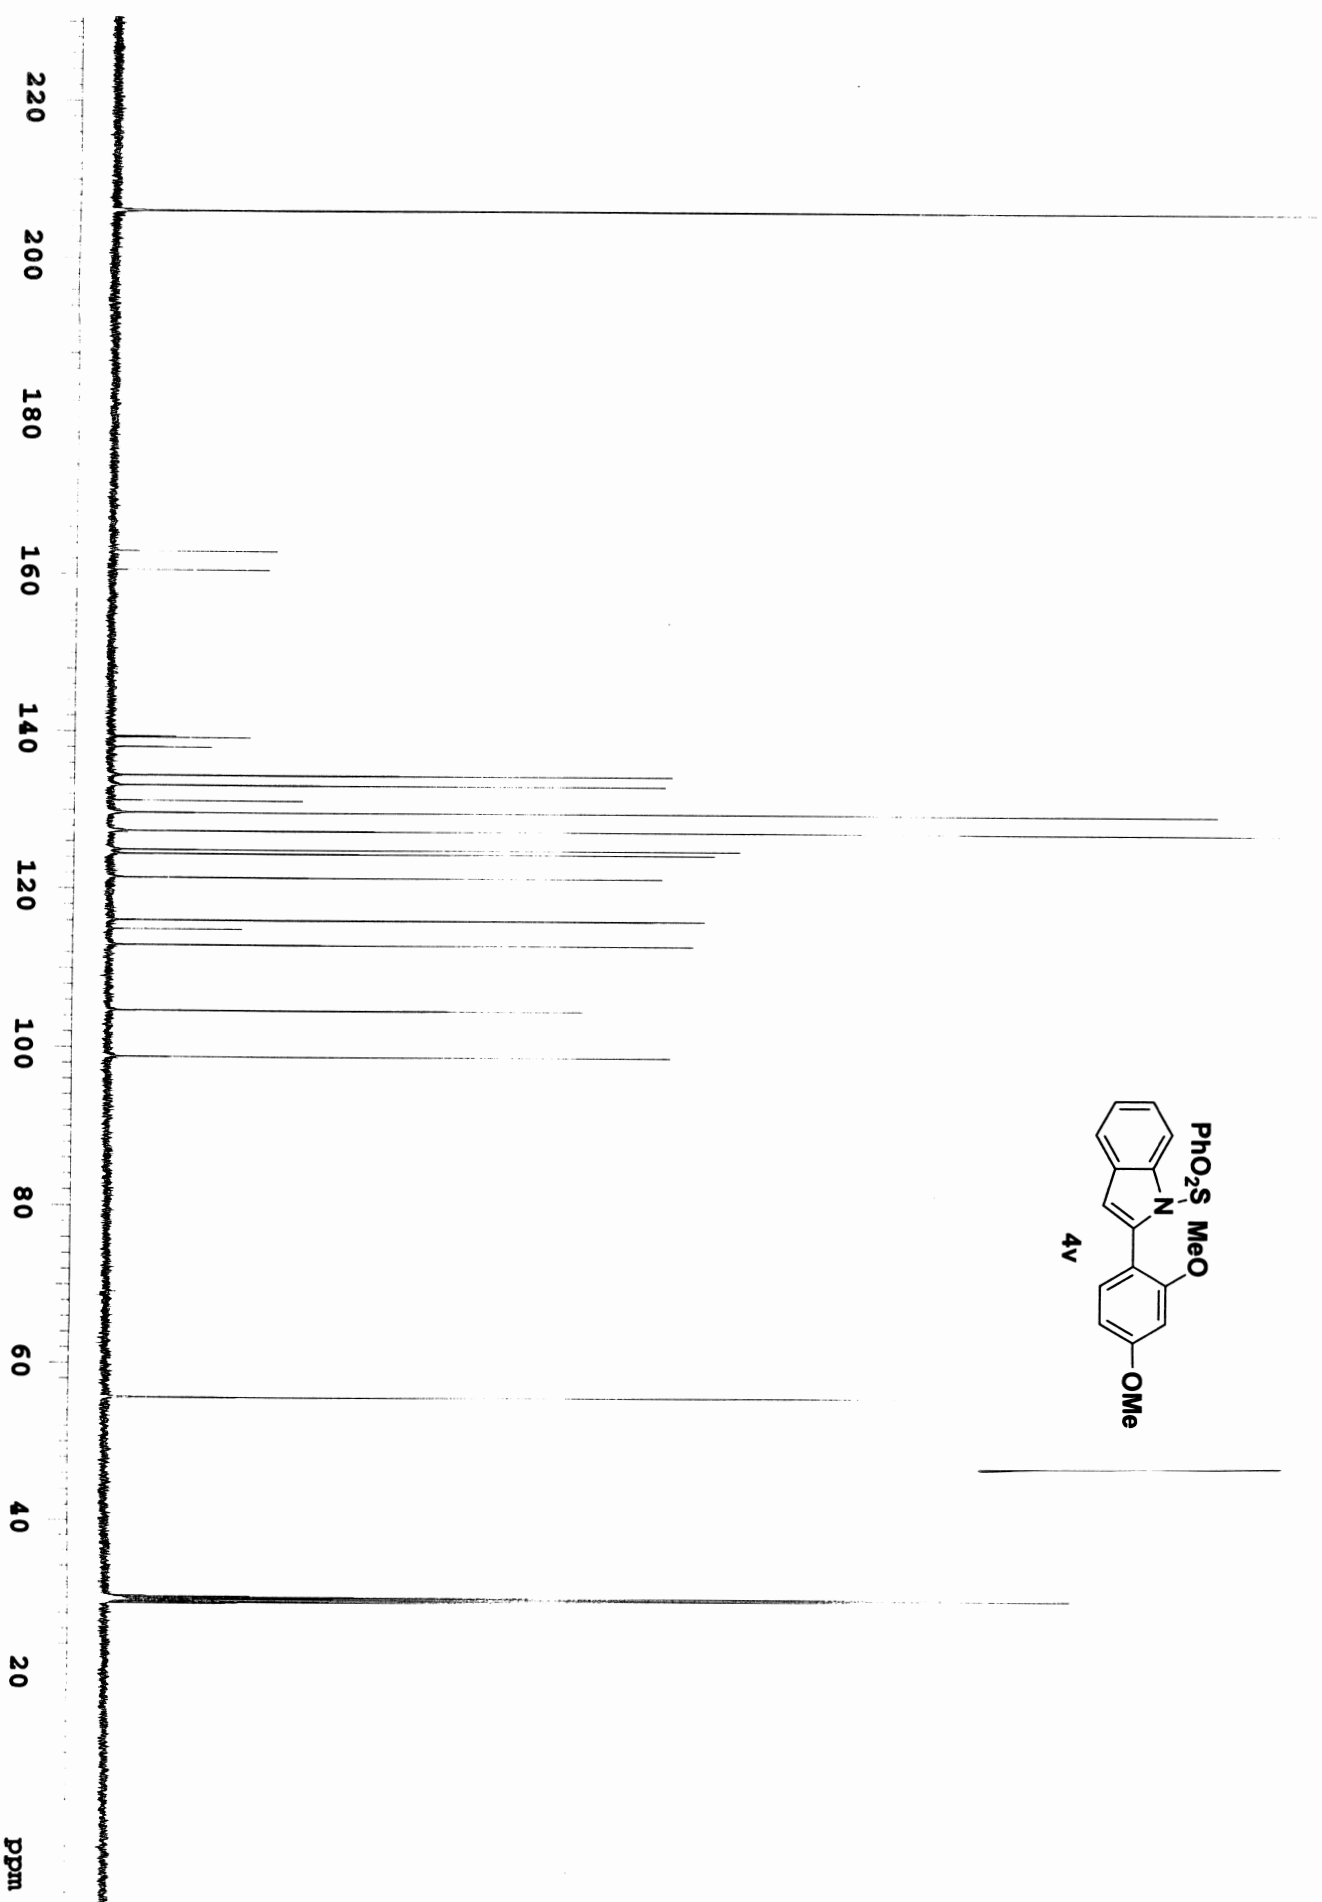

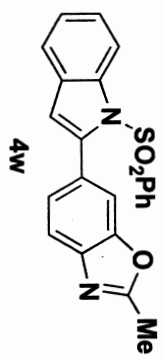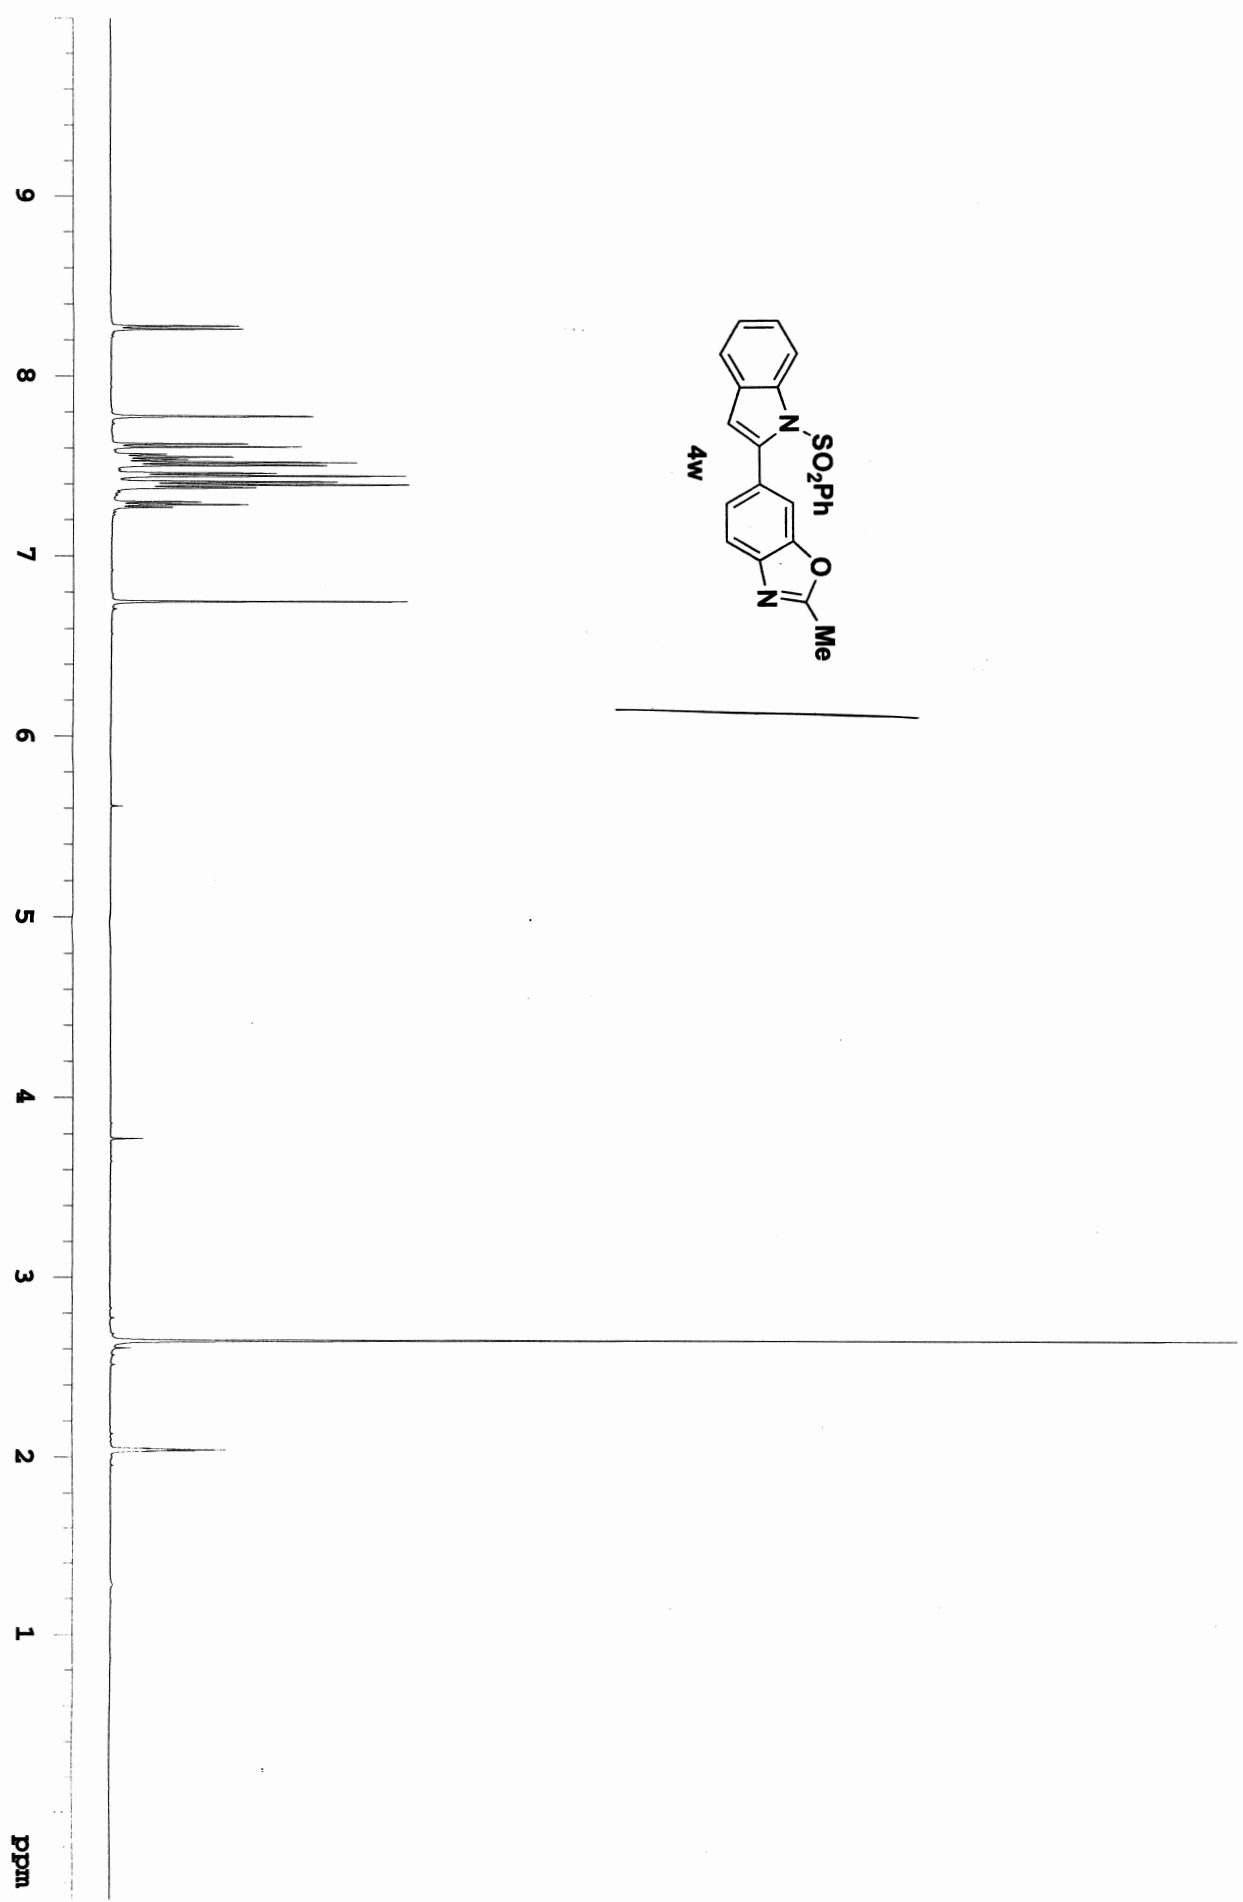

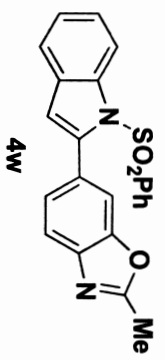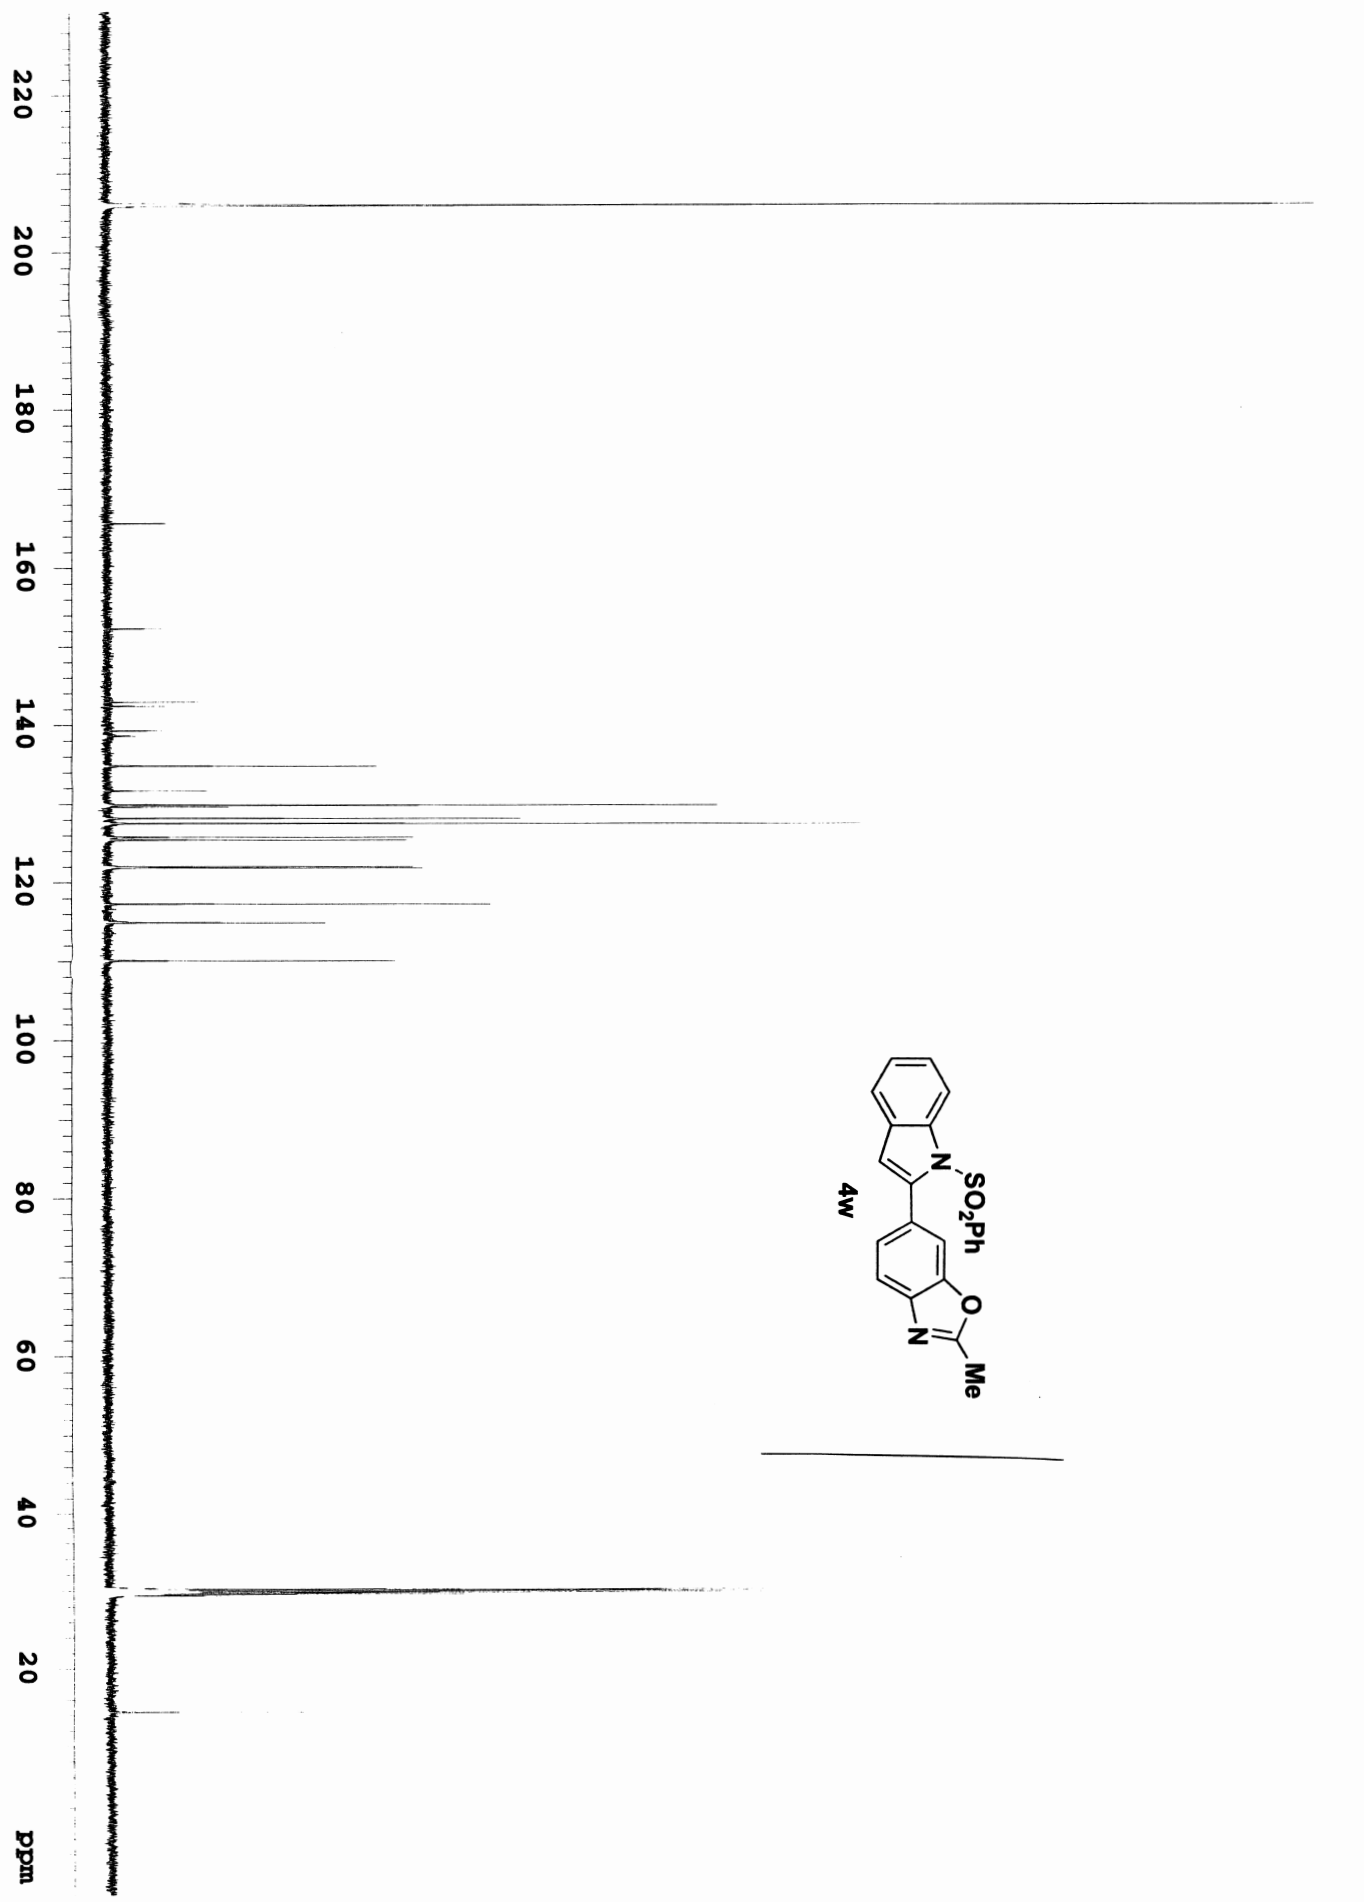

9  
8  
7  
6  
5  
4  
3  
2  
1  
ppm

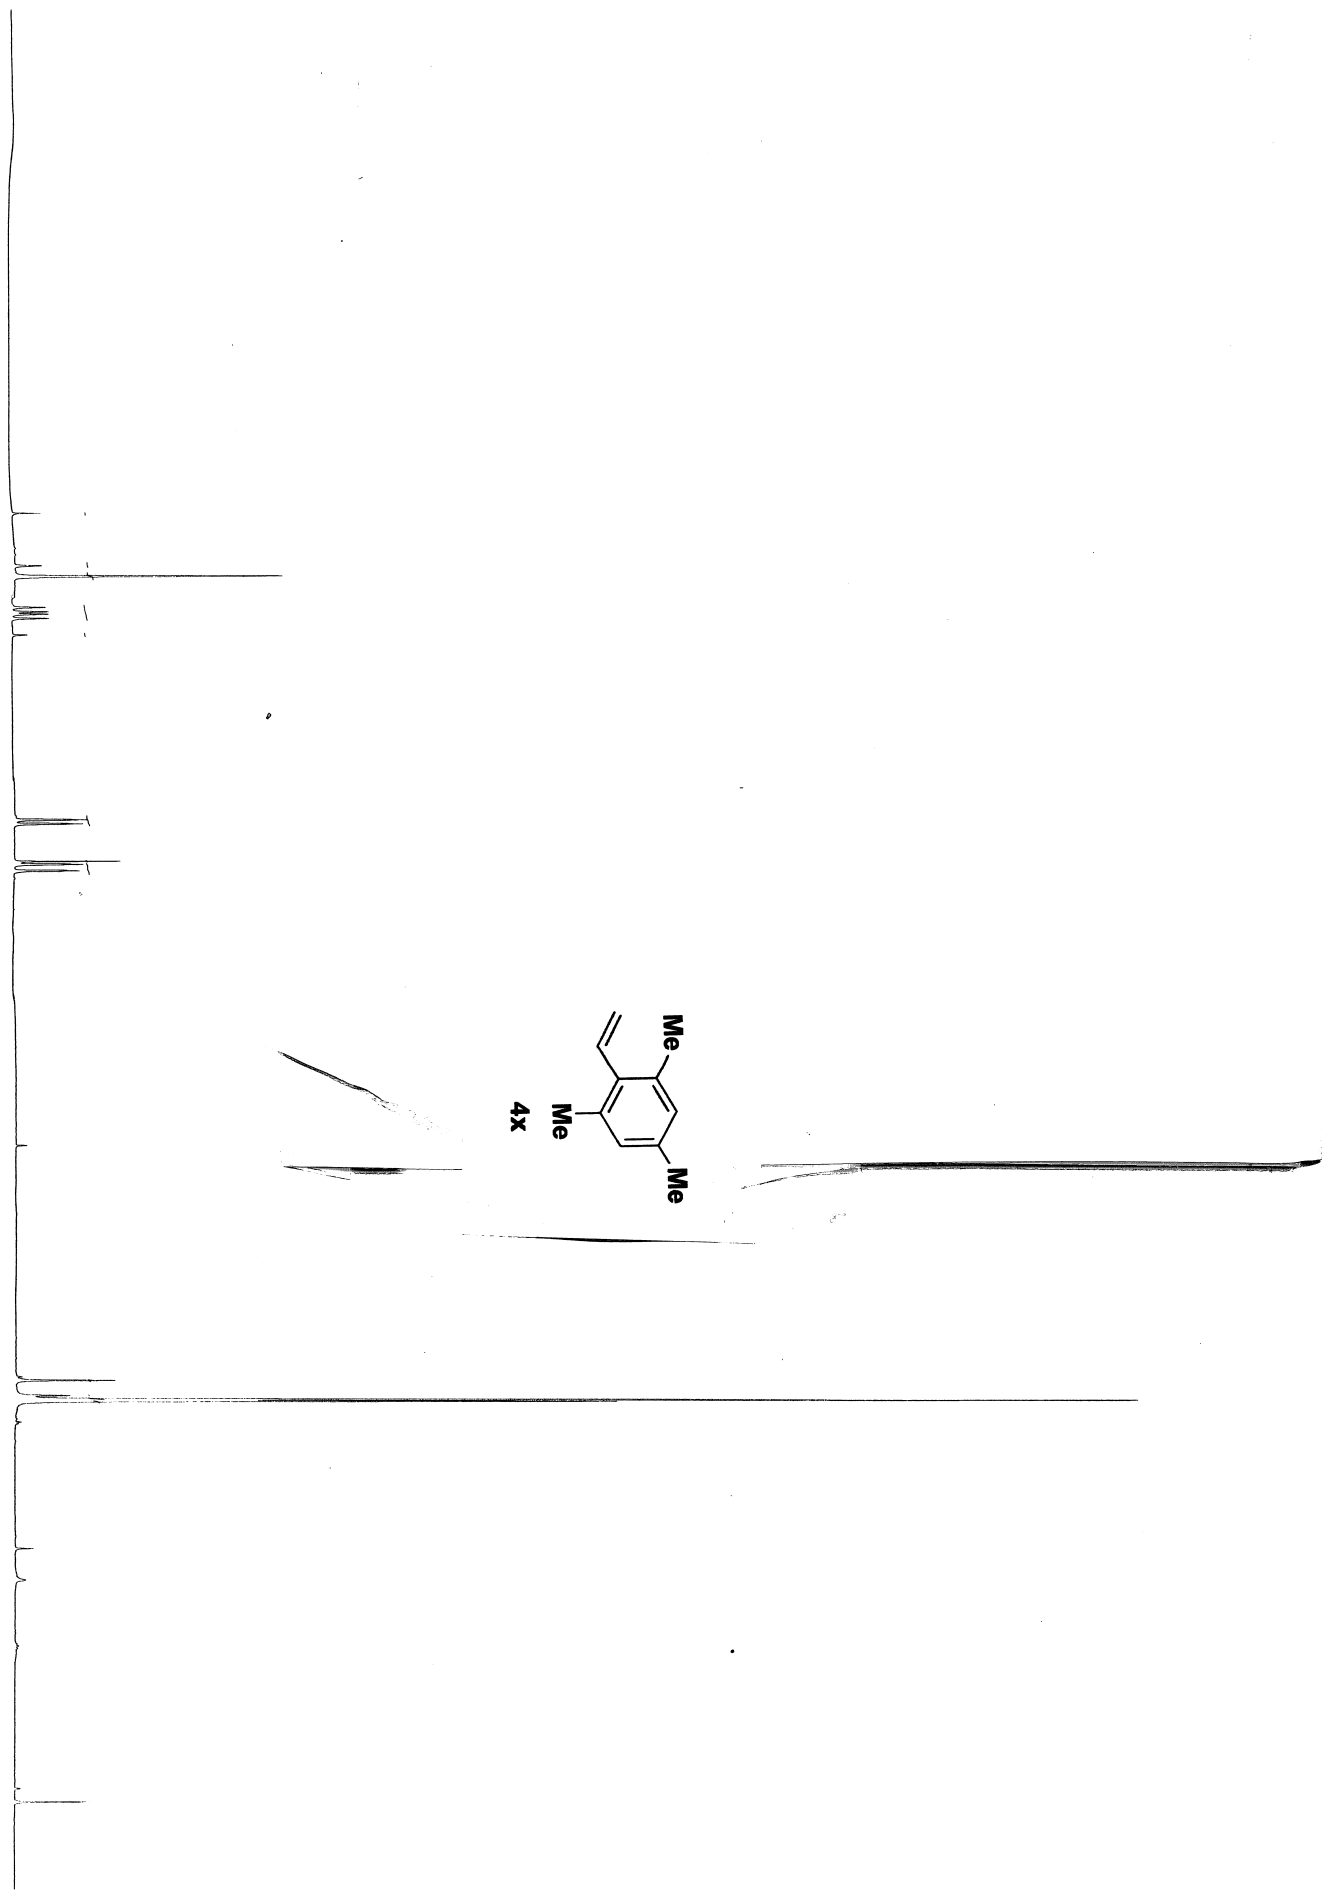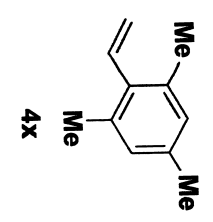

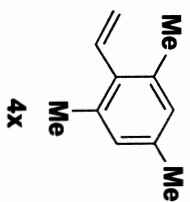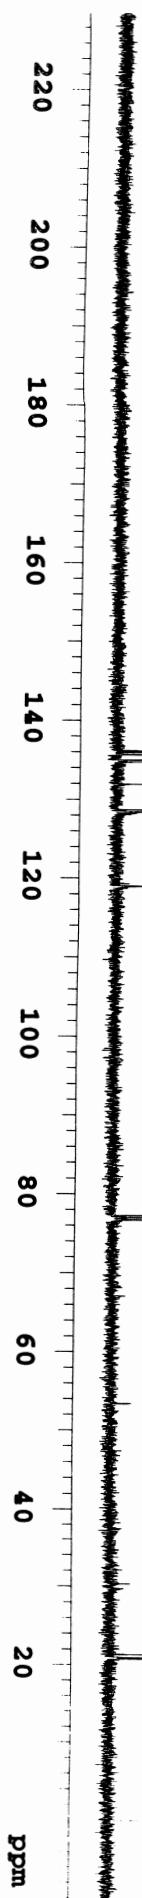



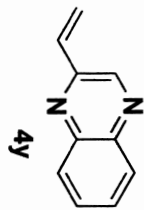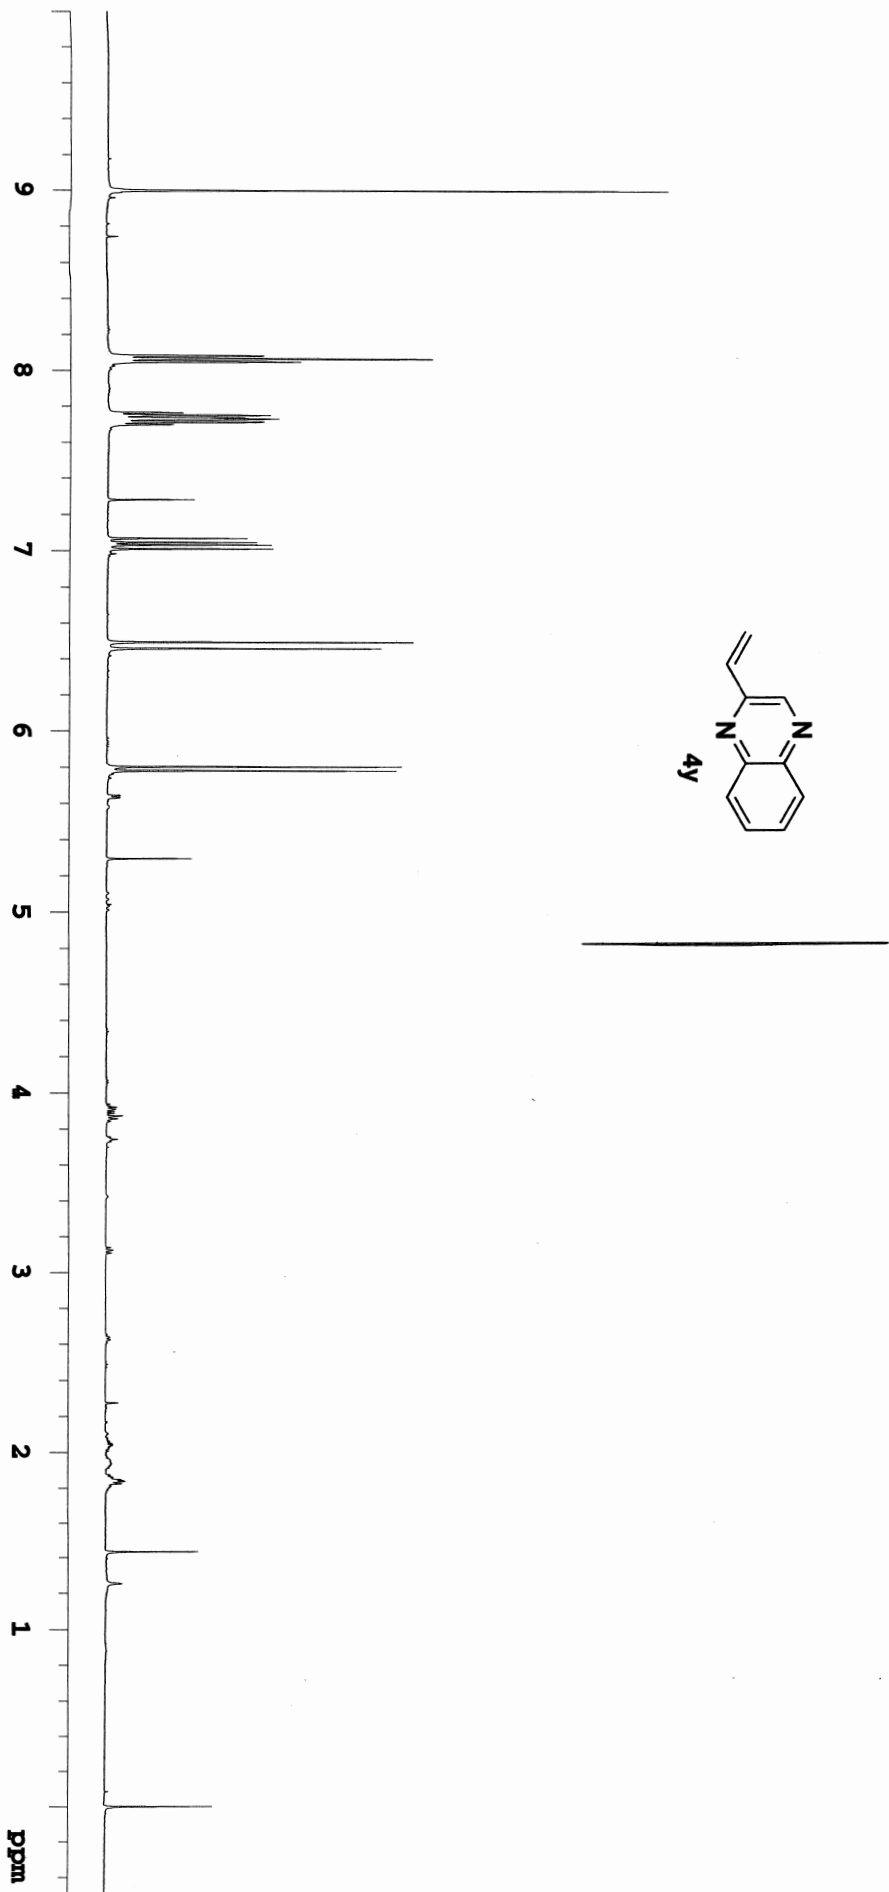

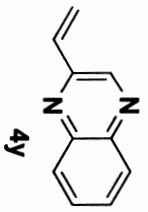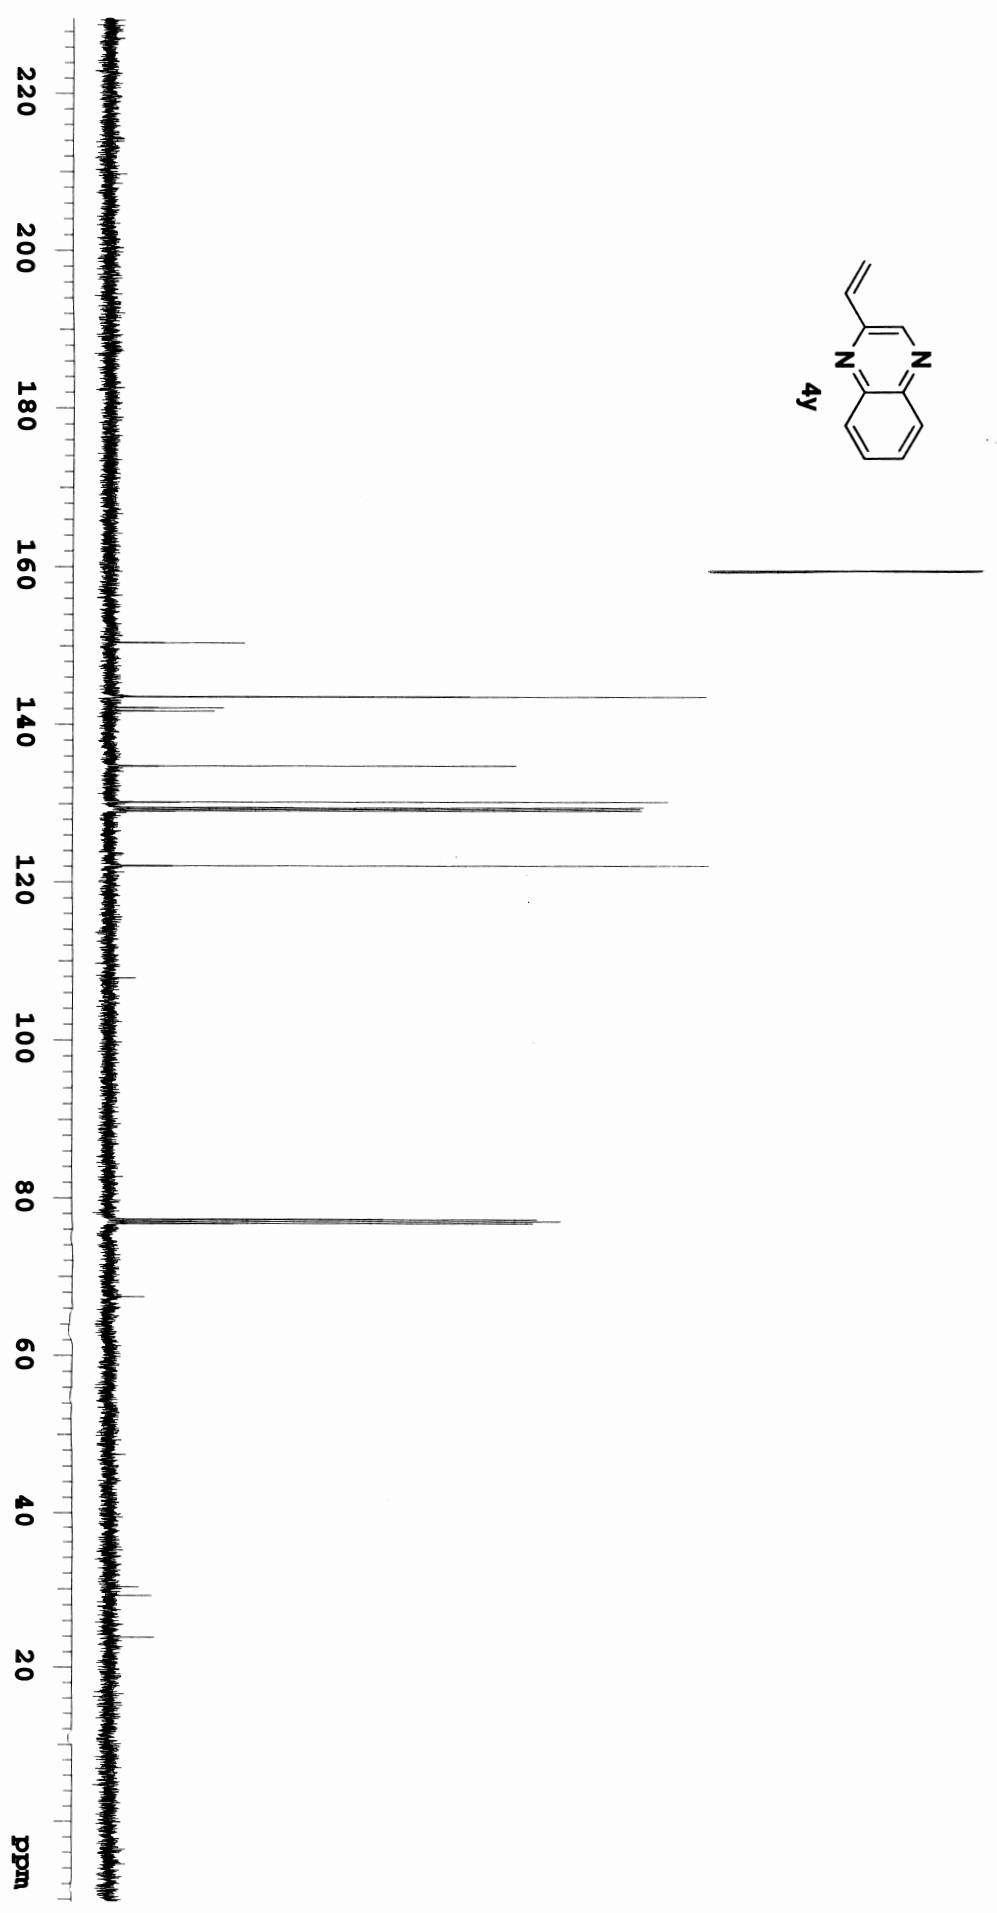

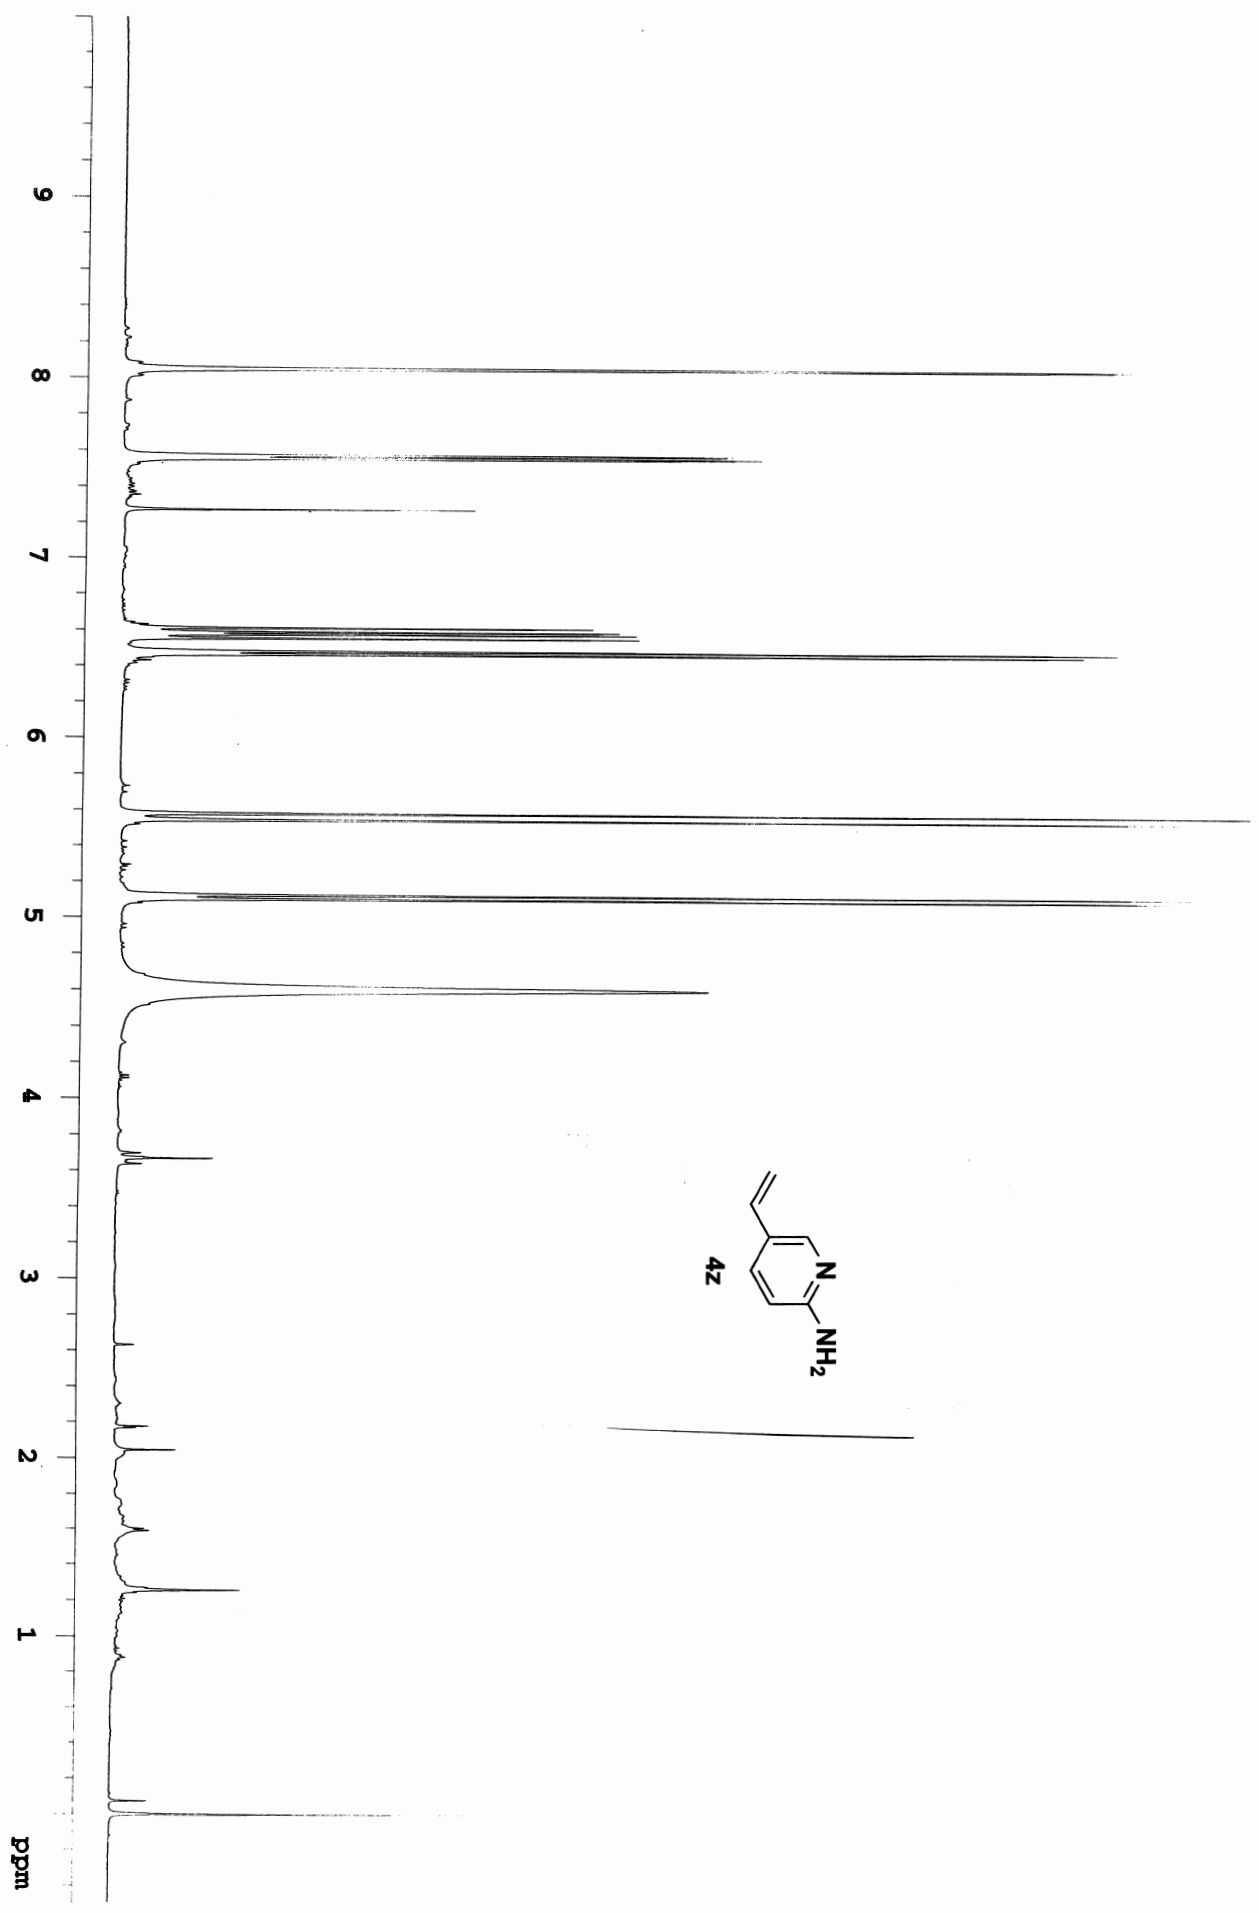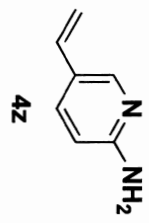

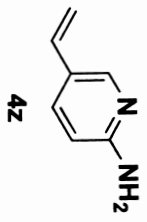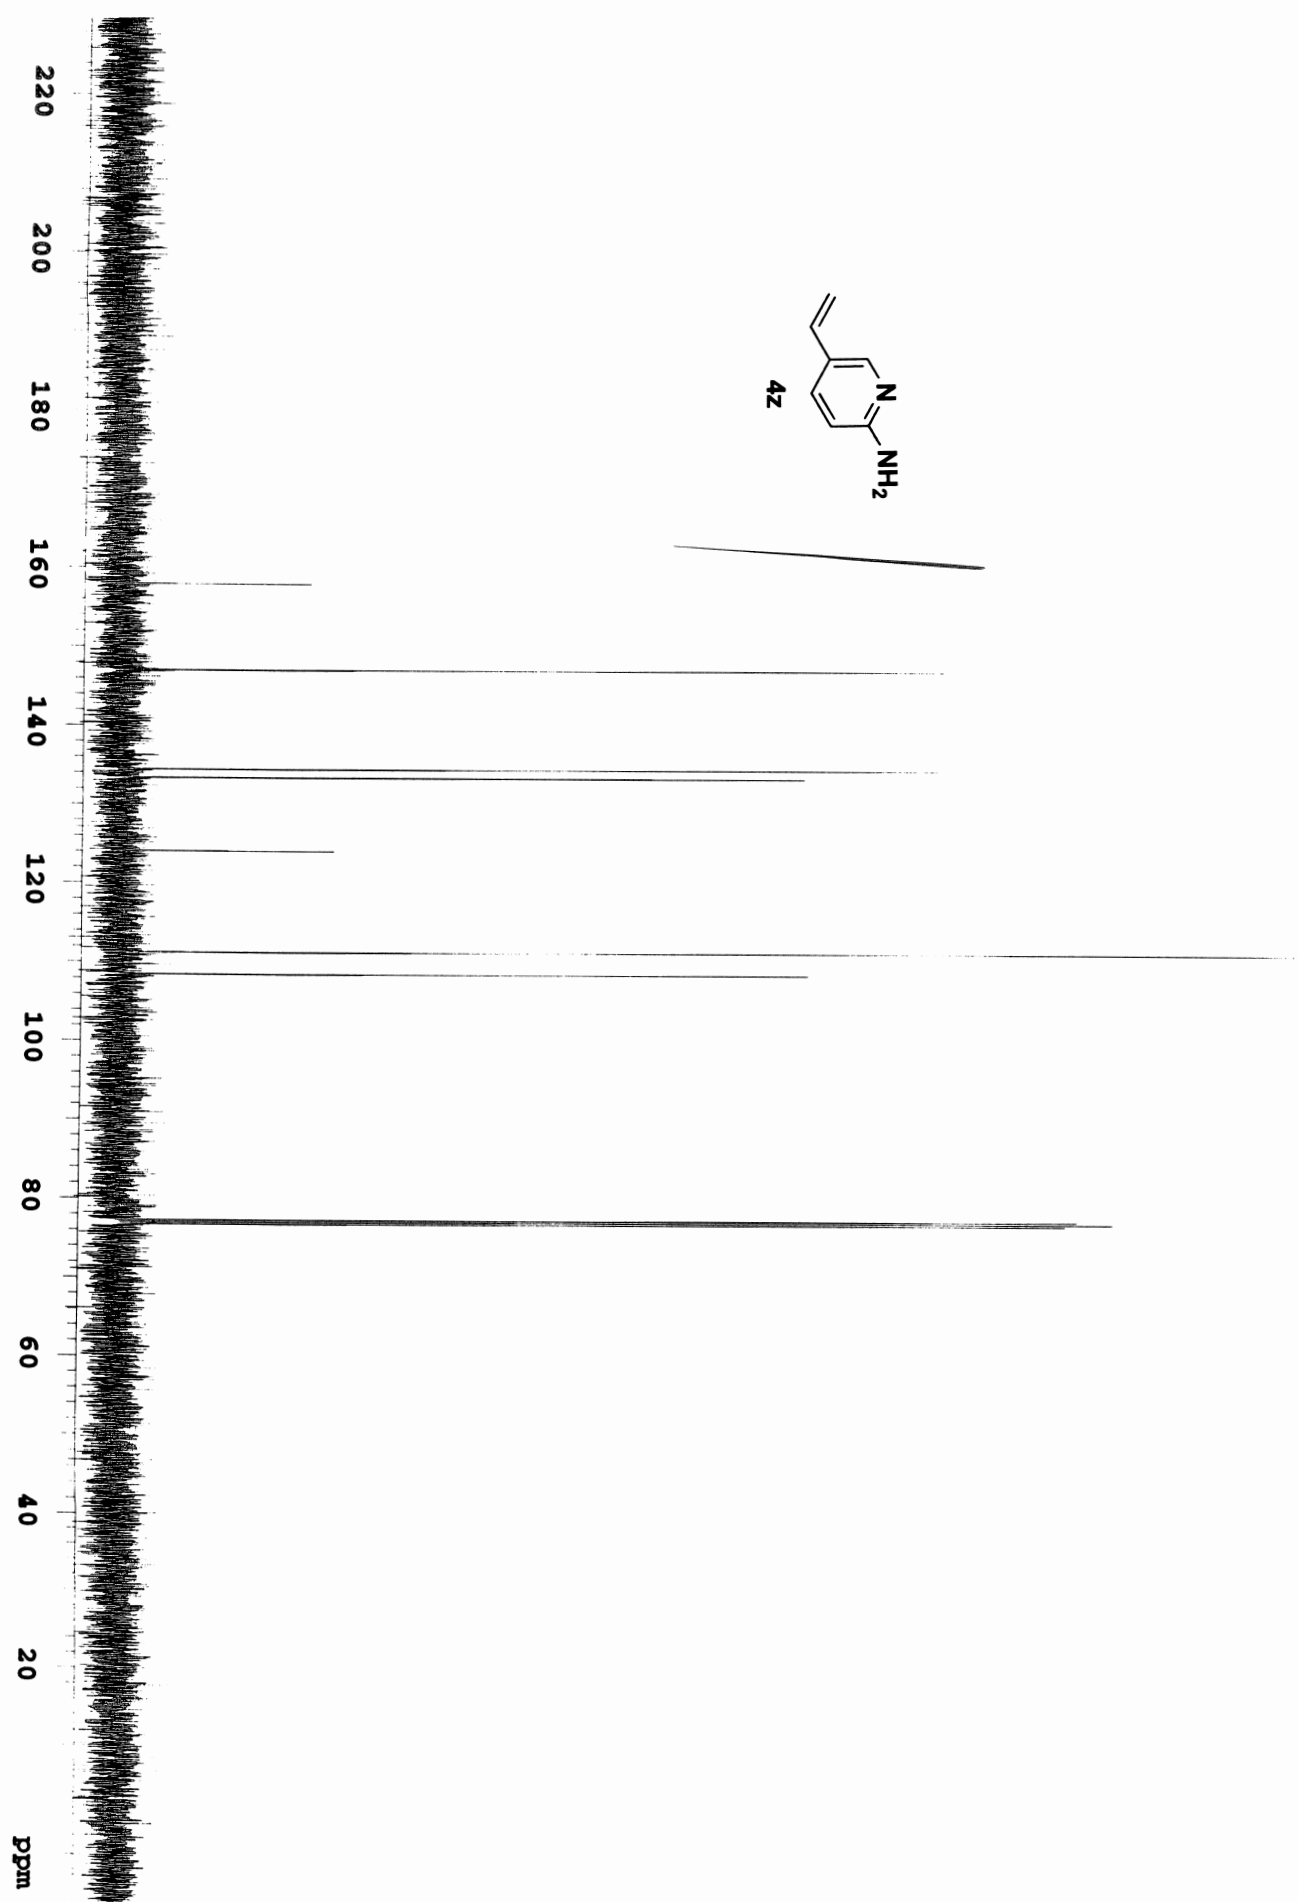

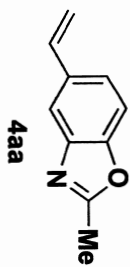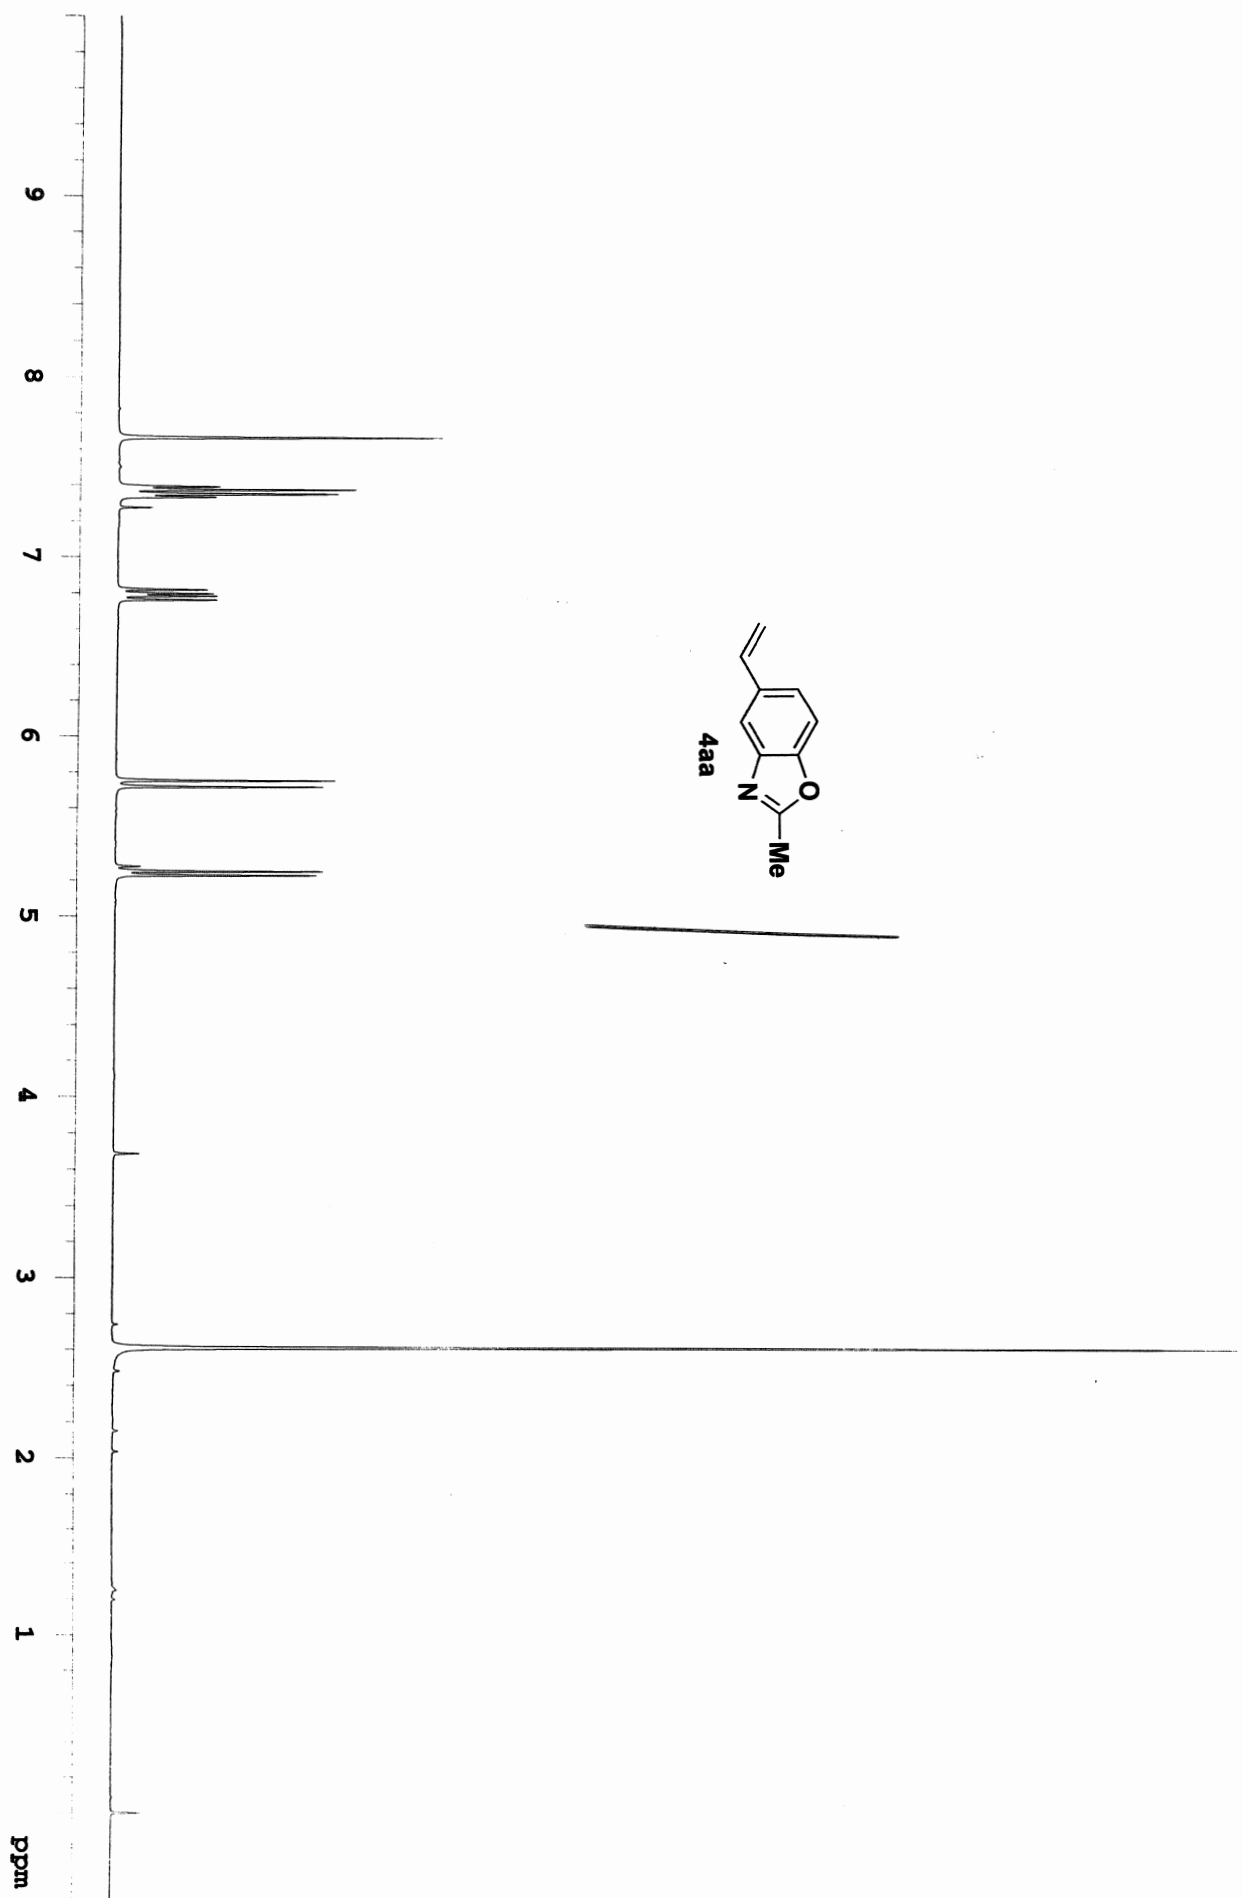

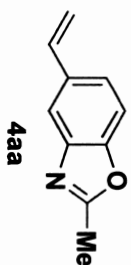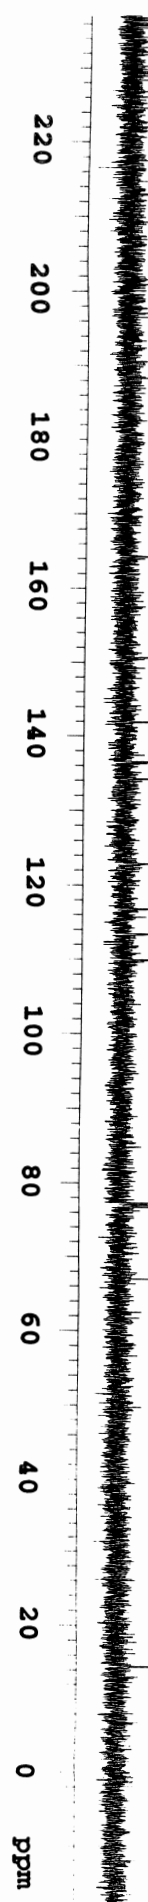

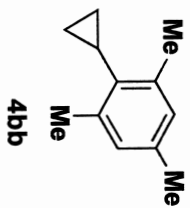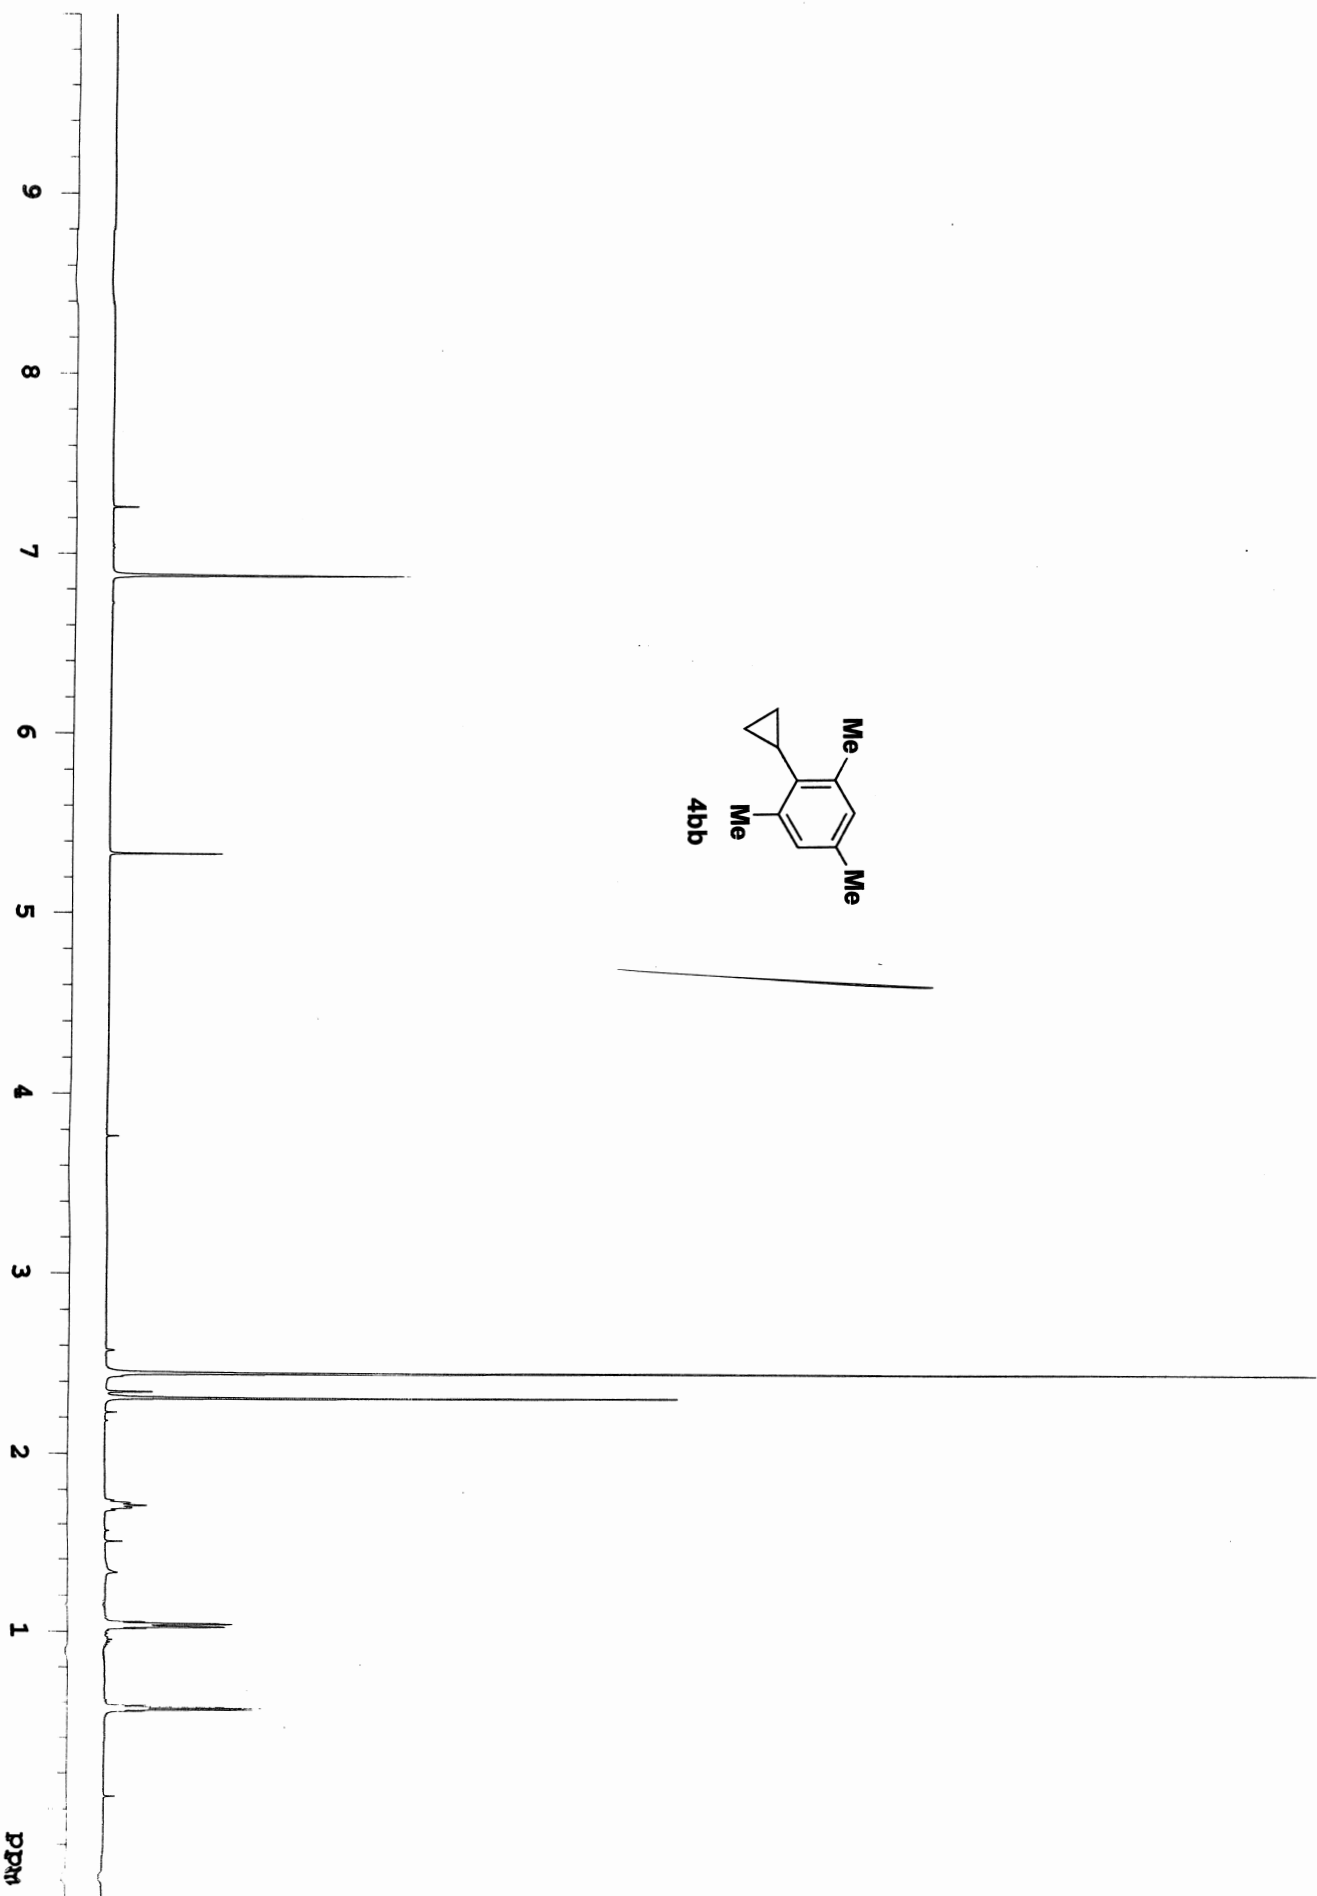

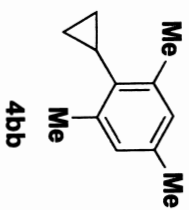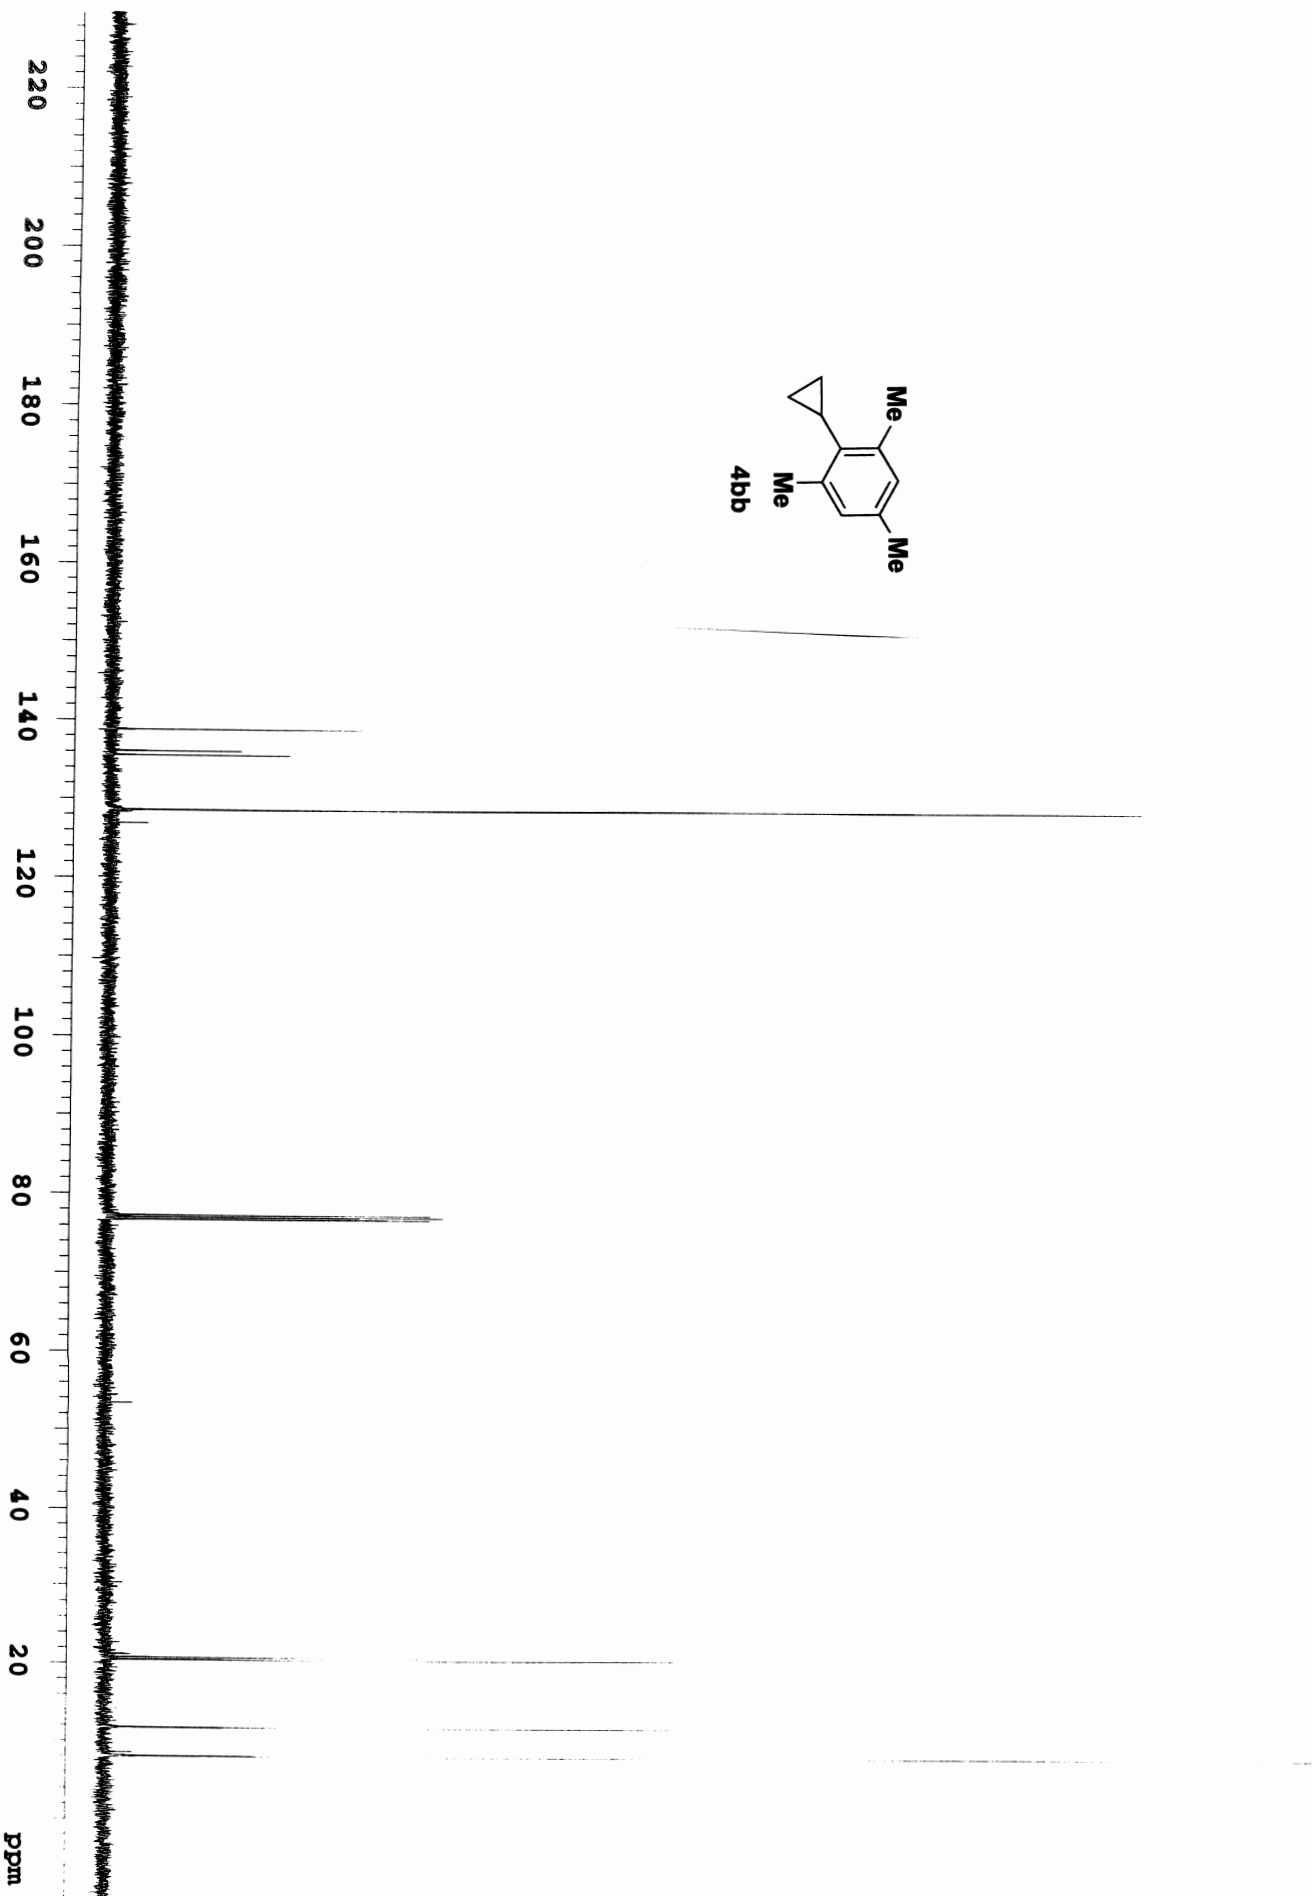



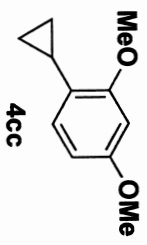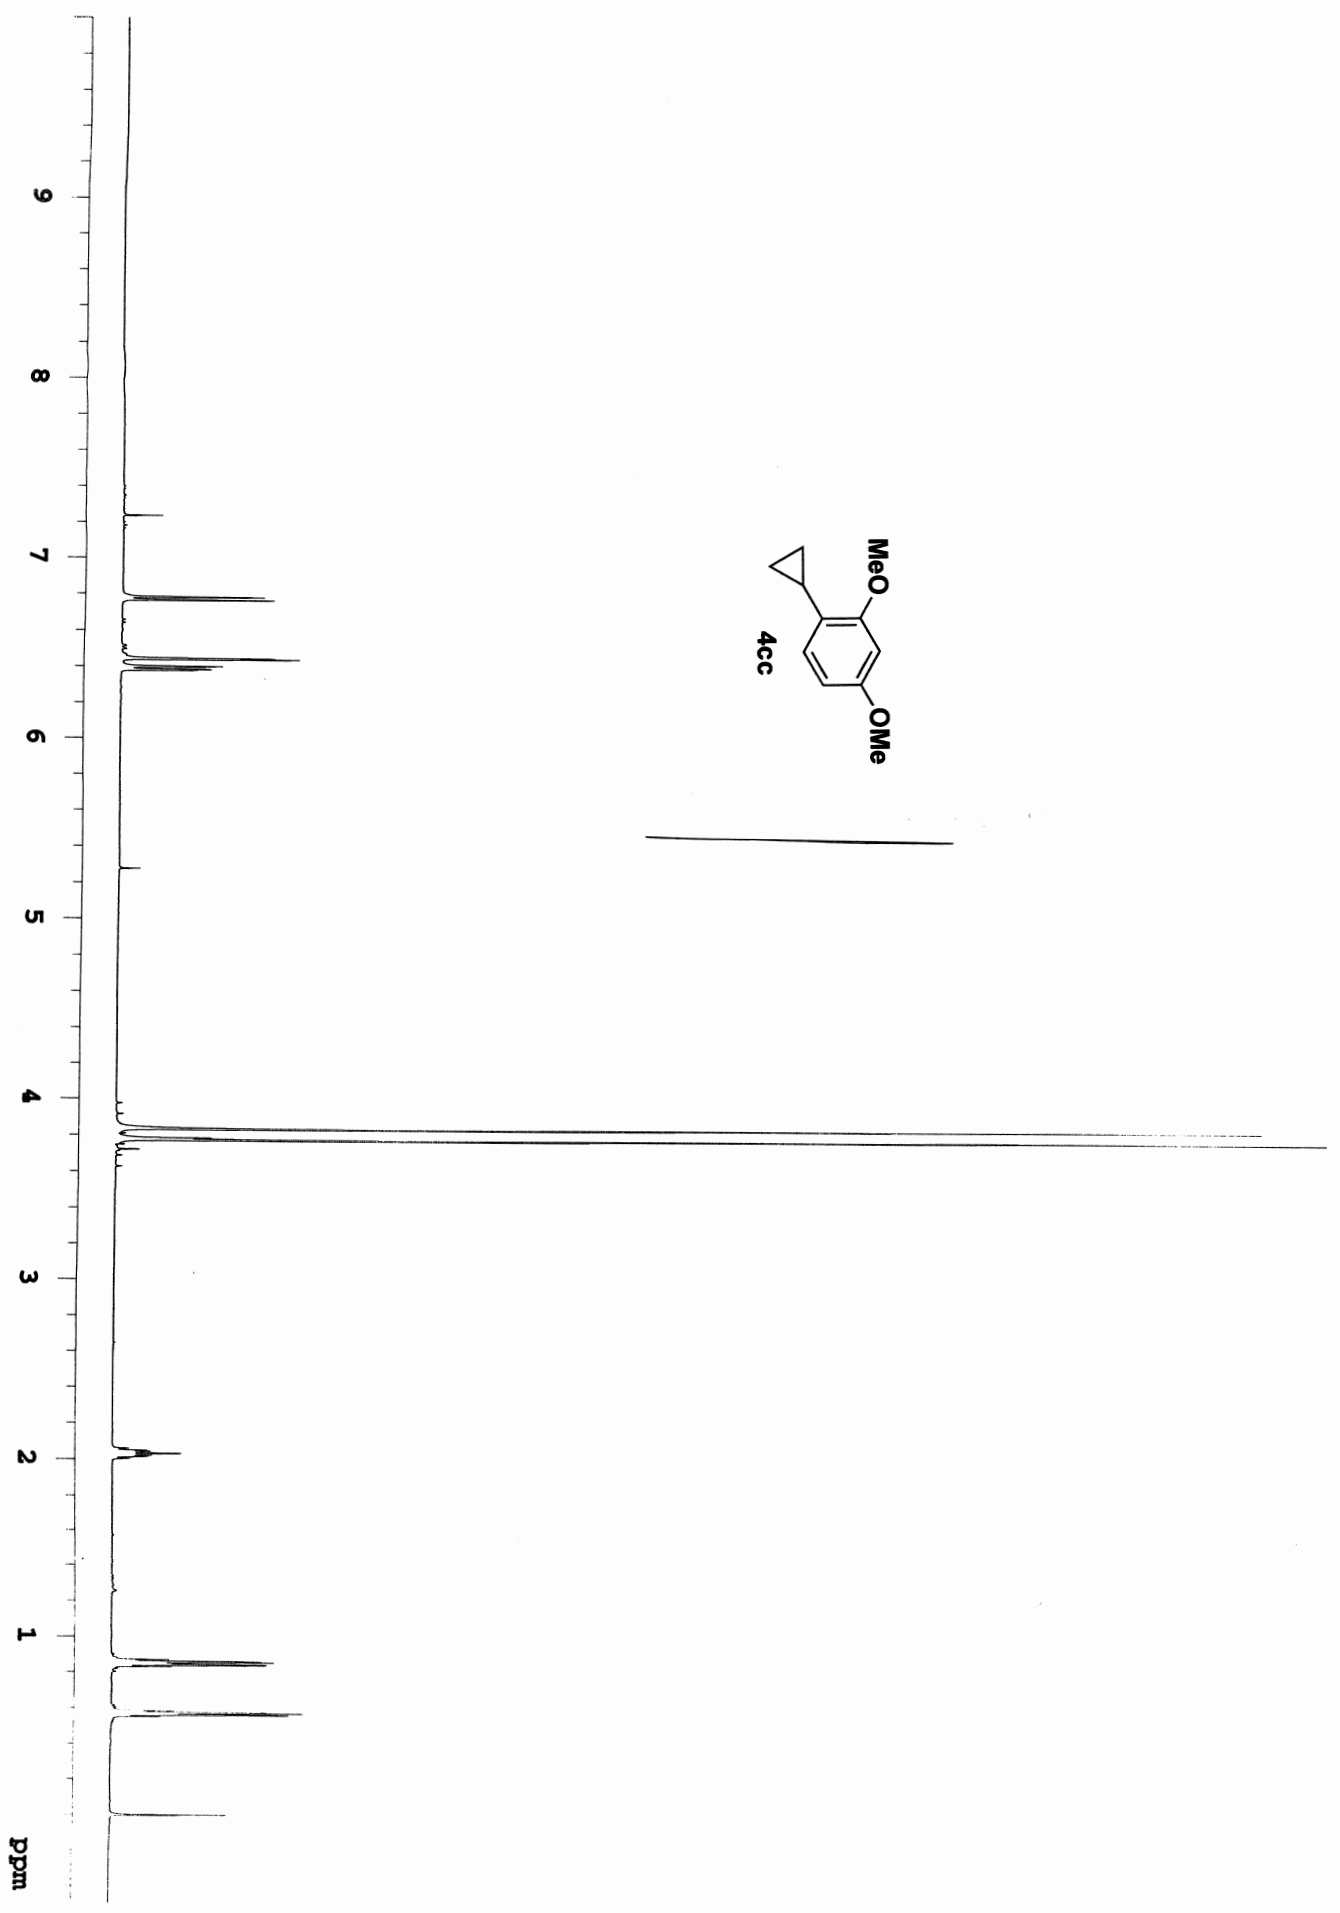

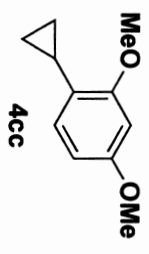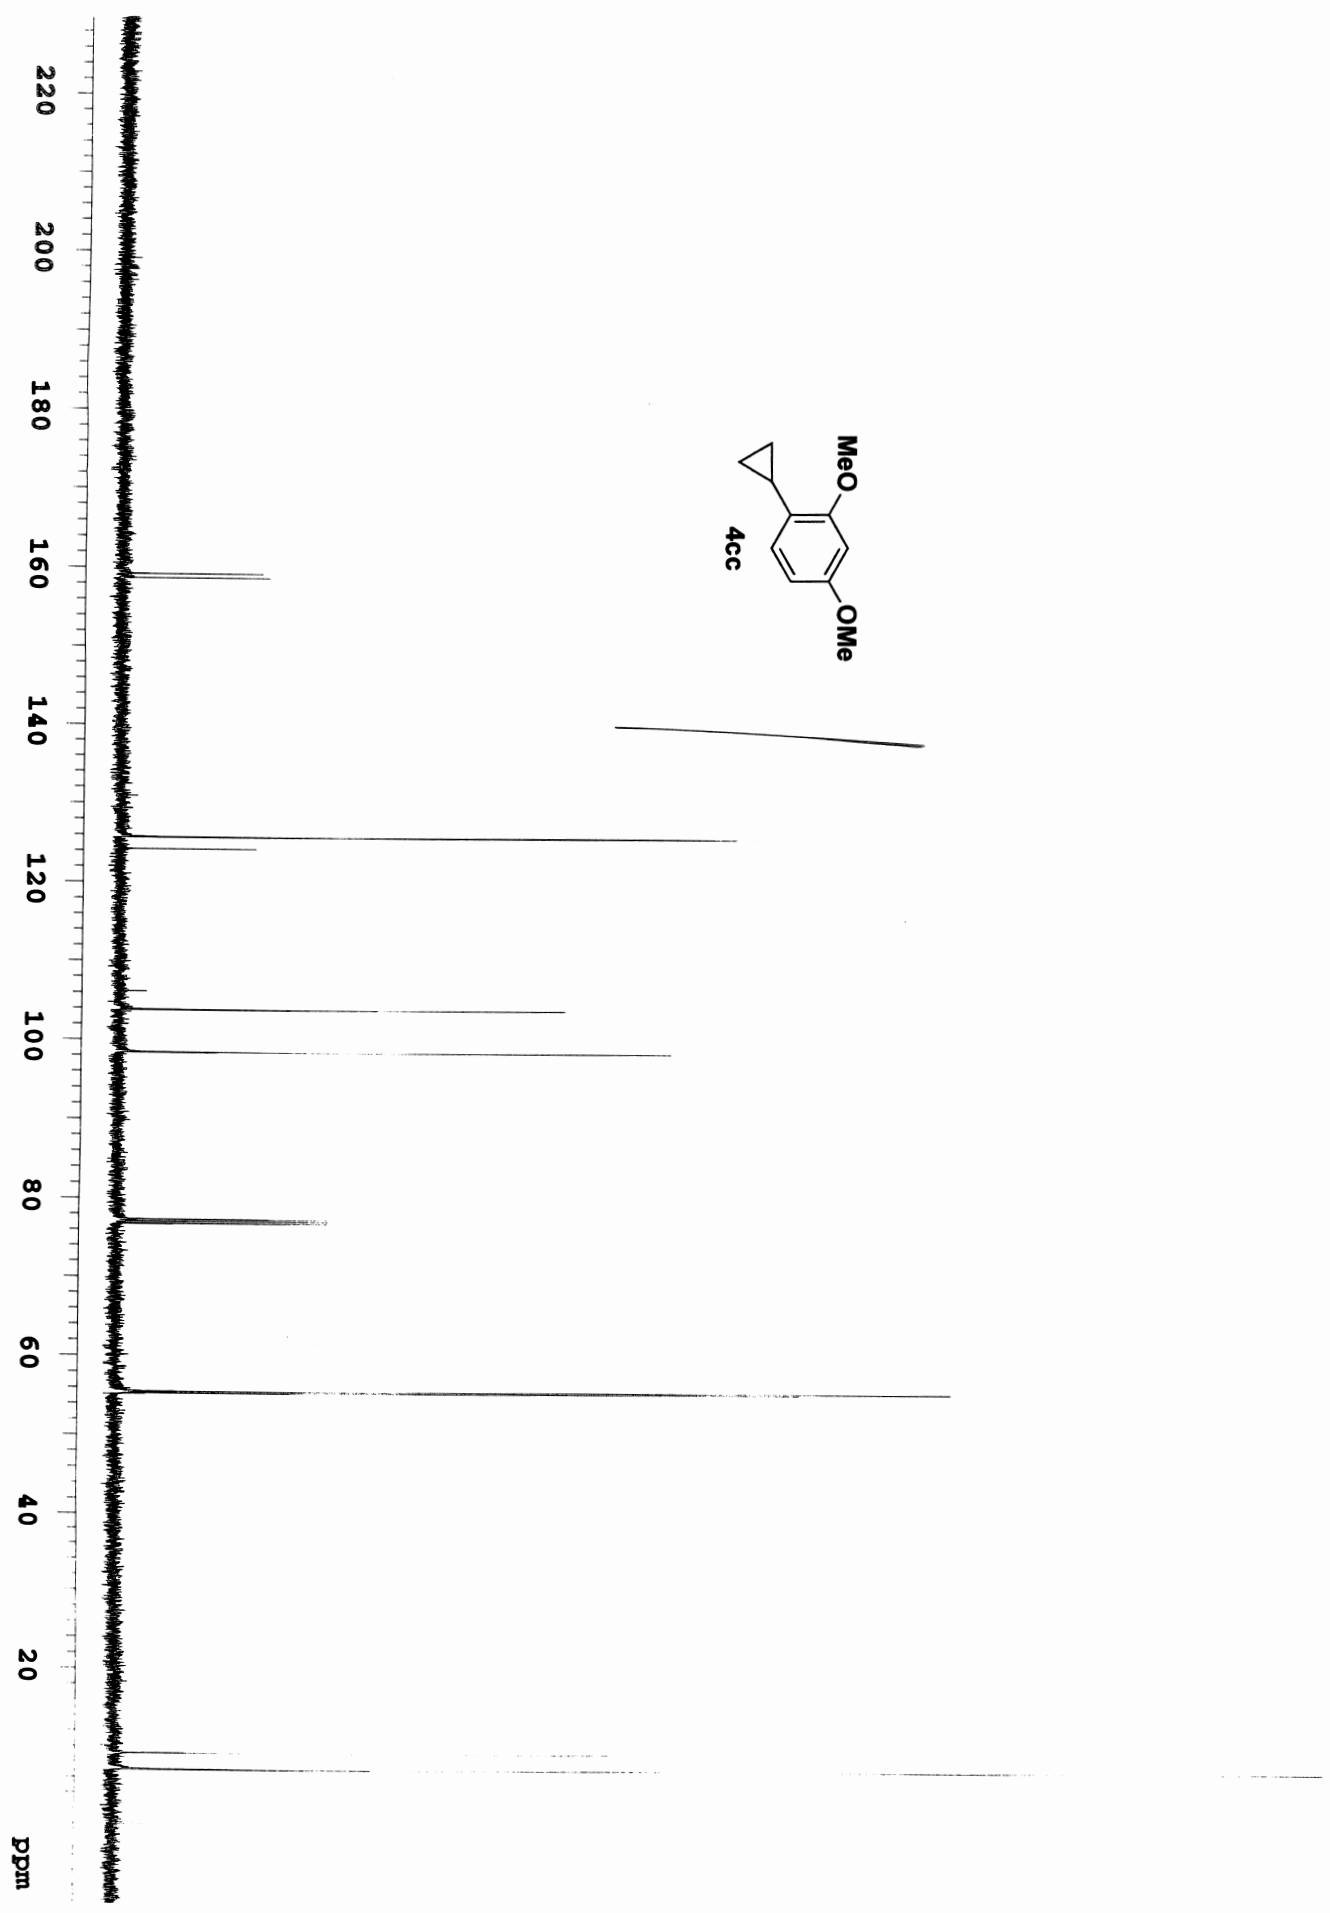

10  
8  
6  
4  
2  
0 PPM

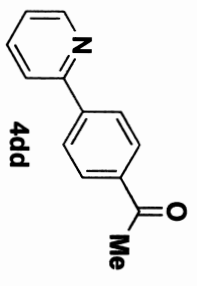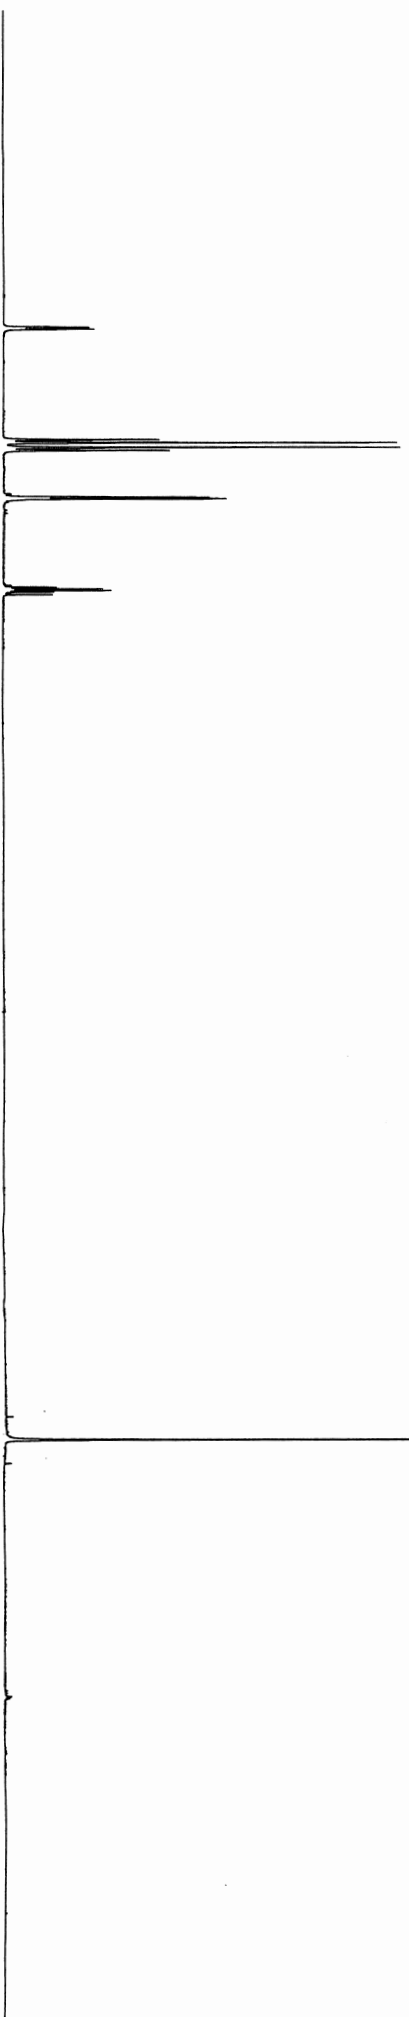

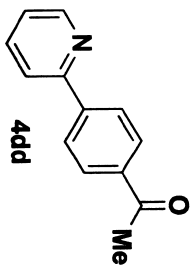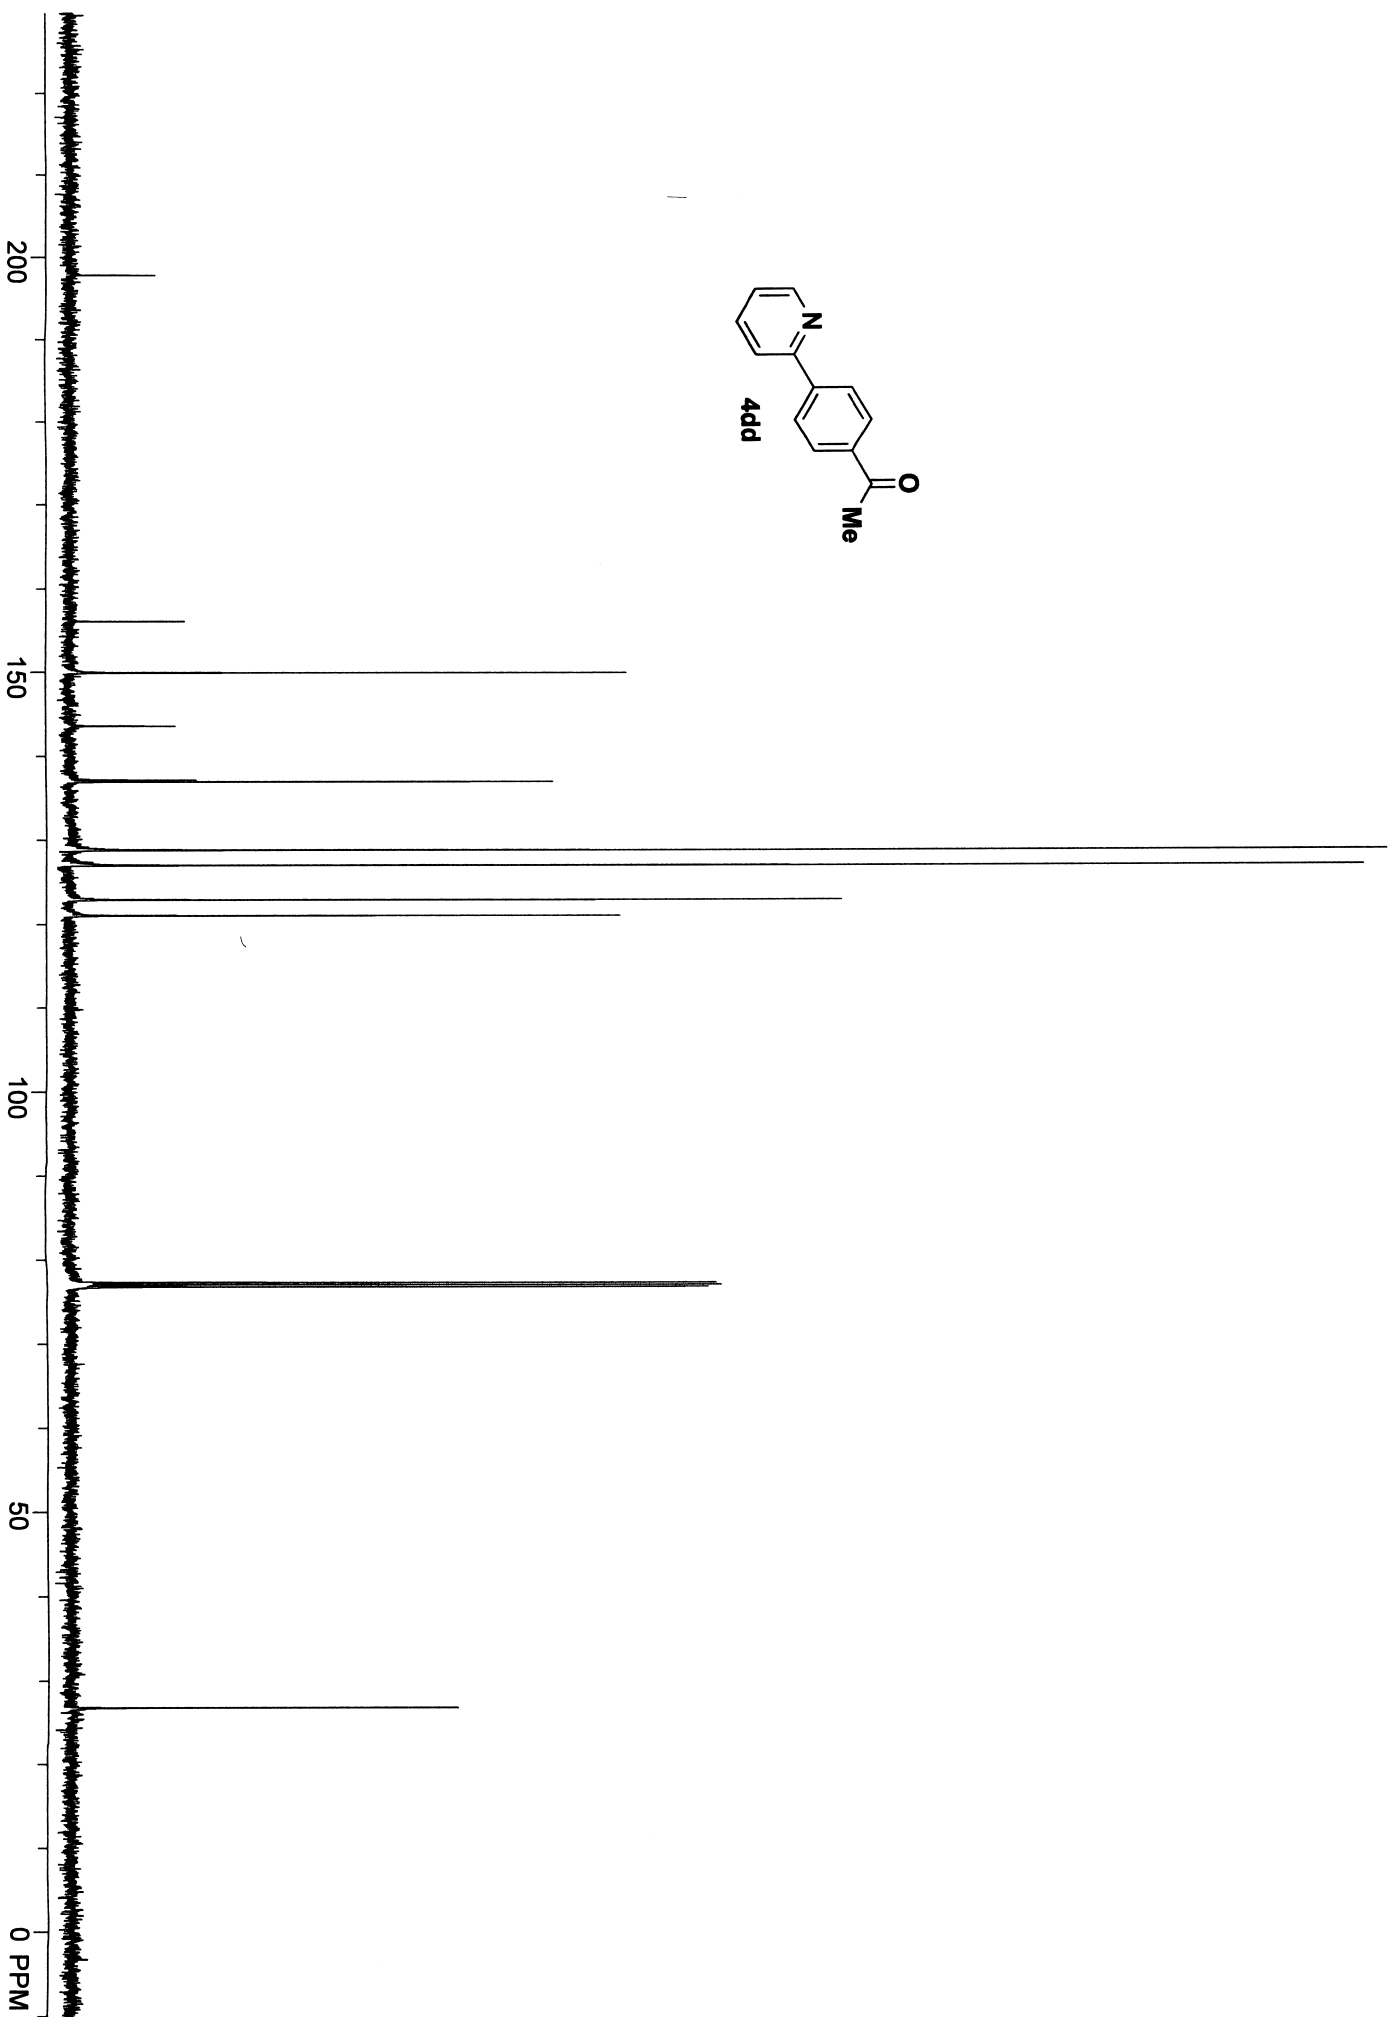

10  
8  
6  
4  
2  
0 PPM

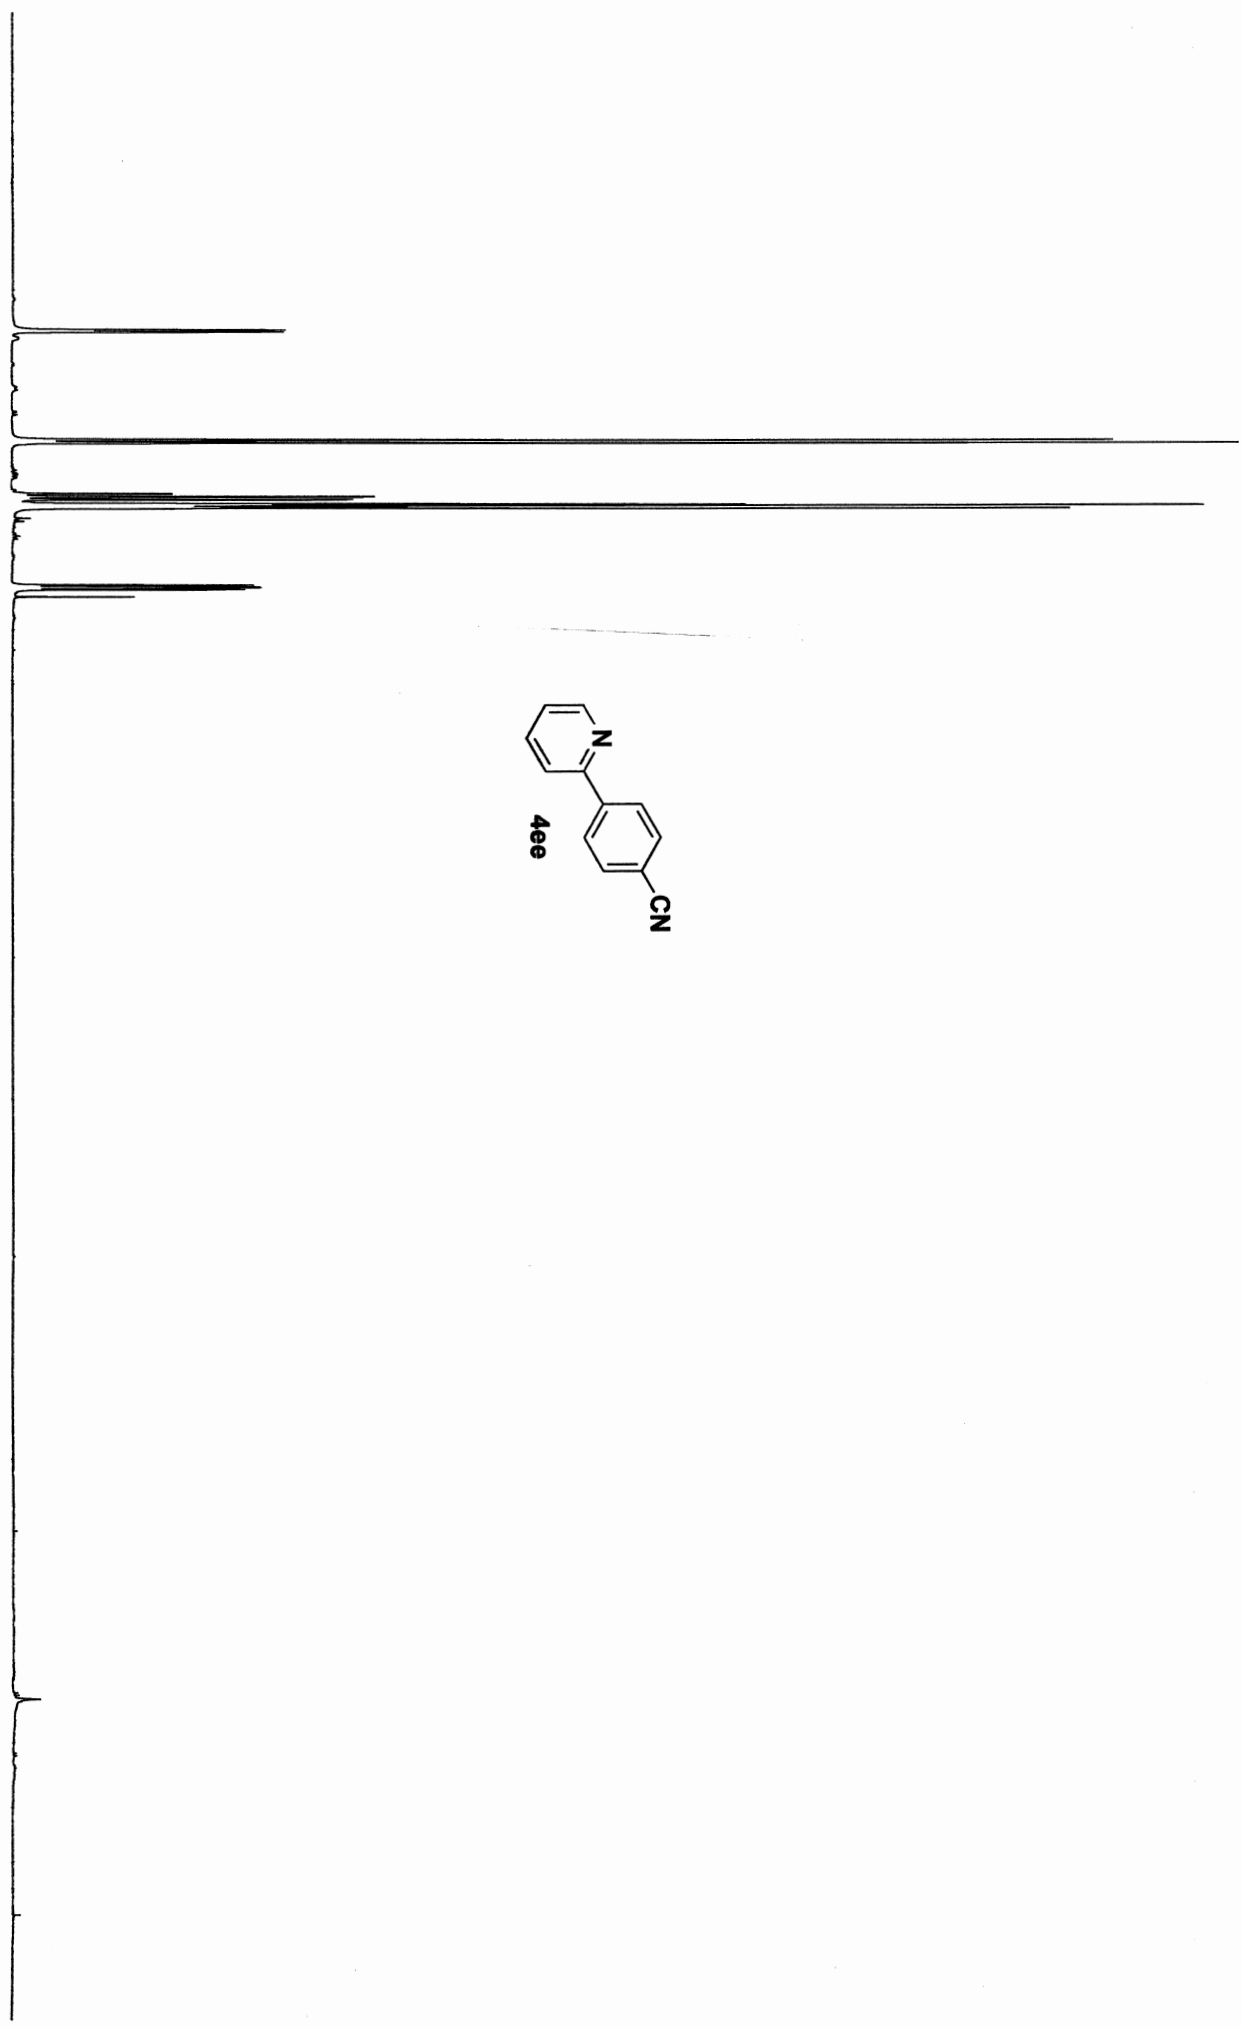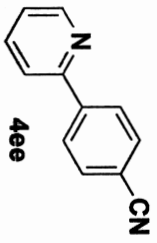

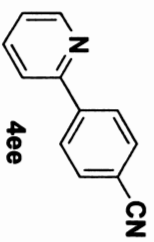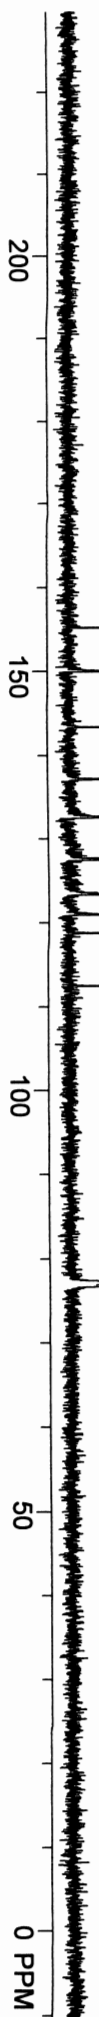

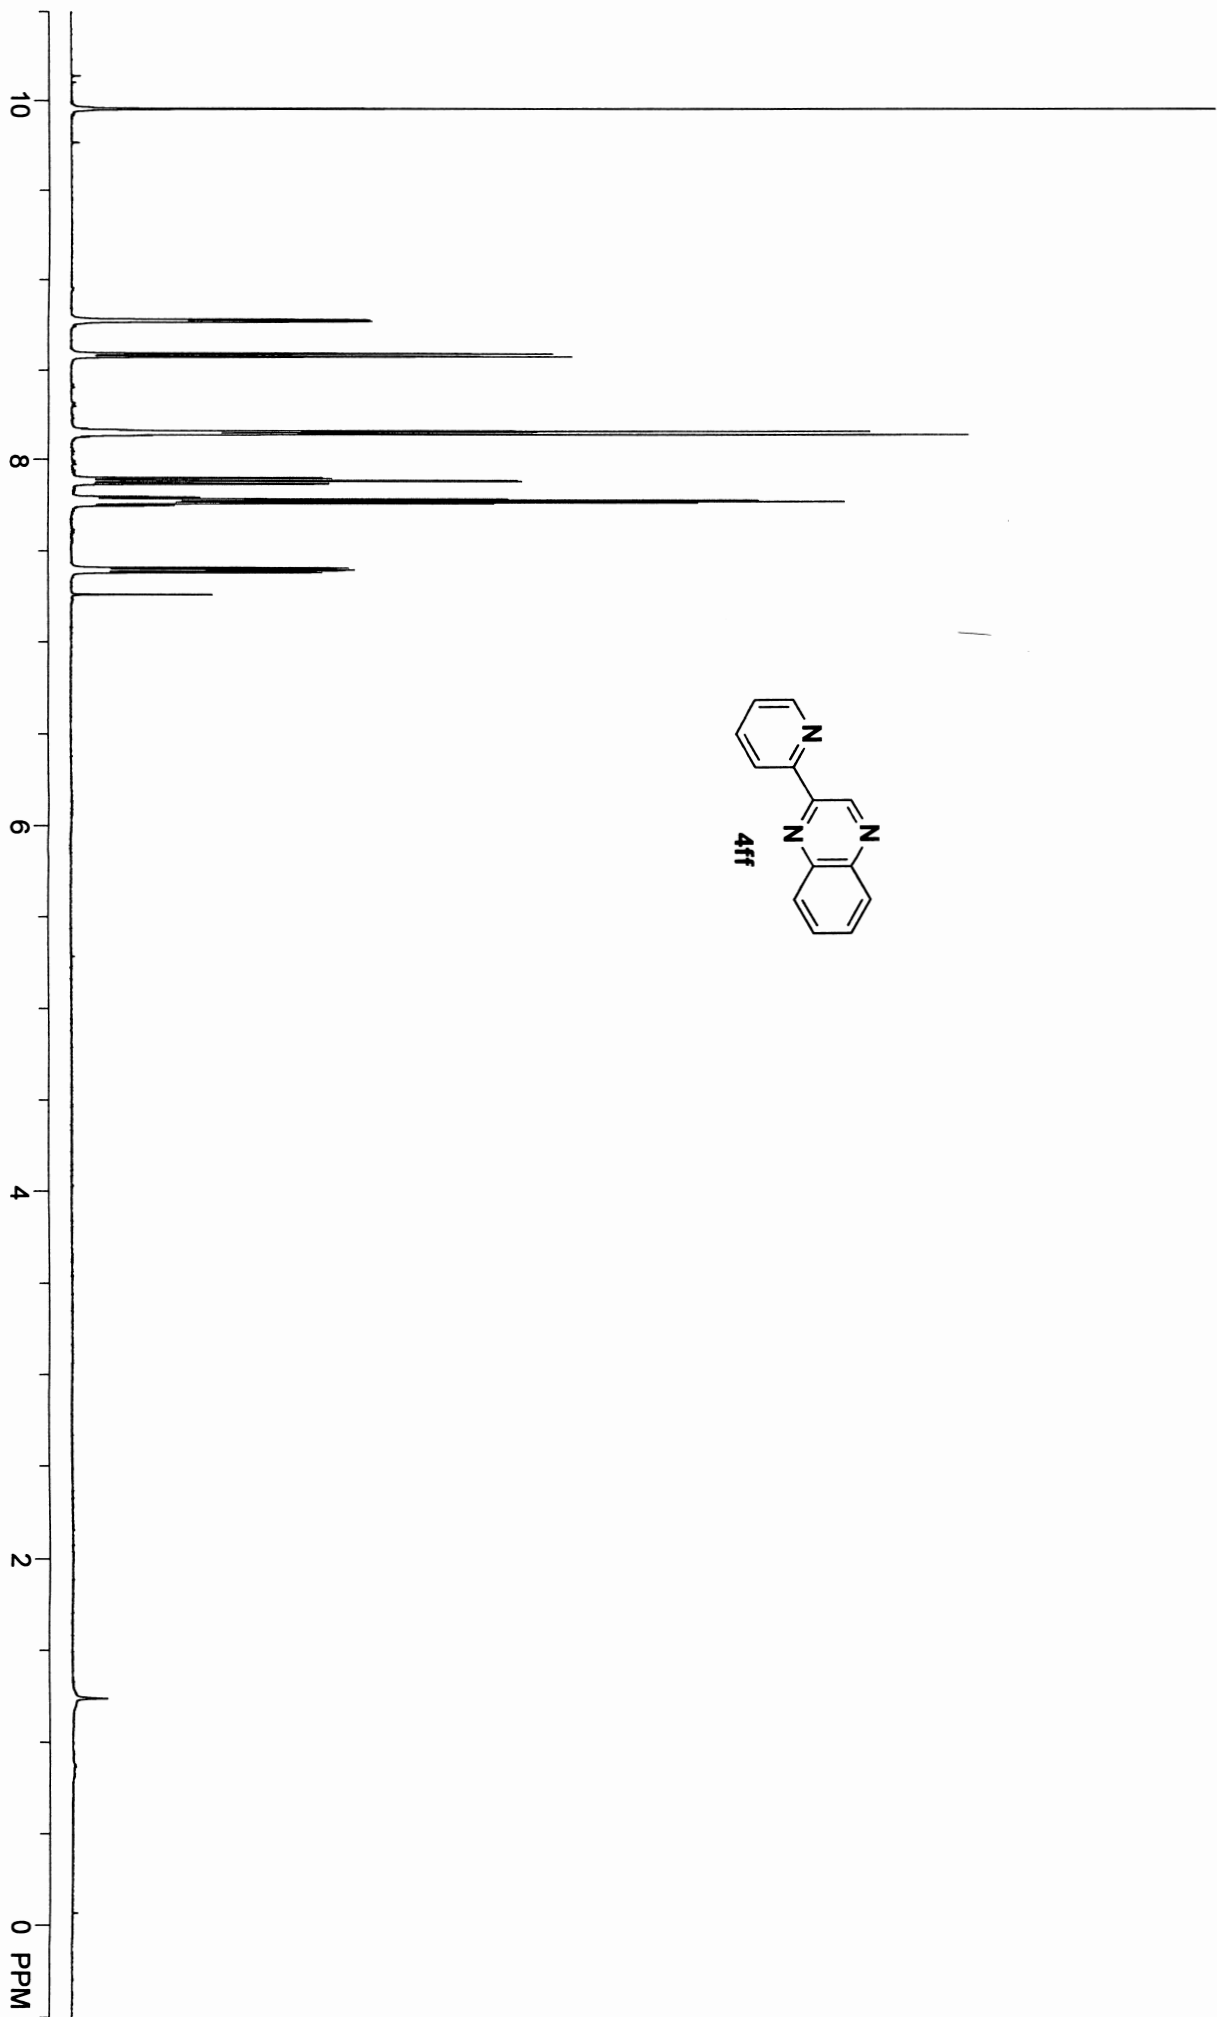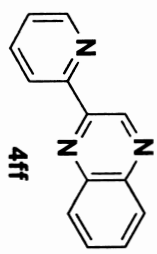

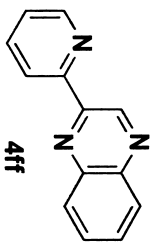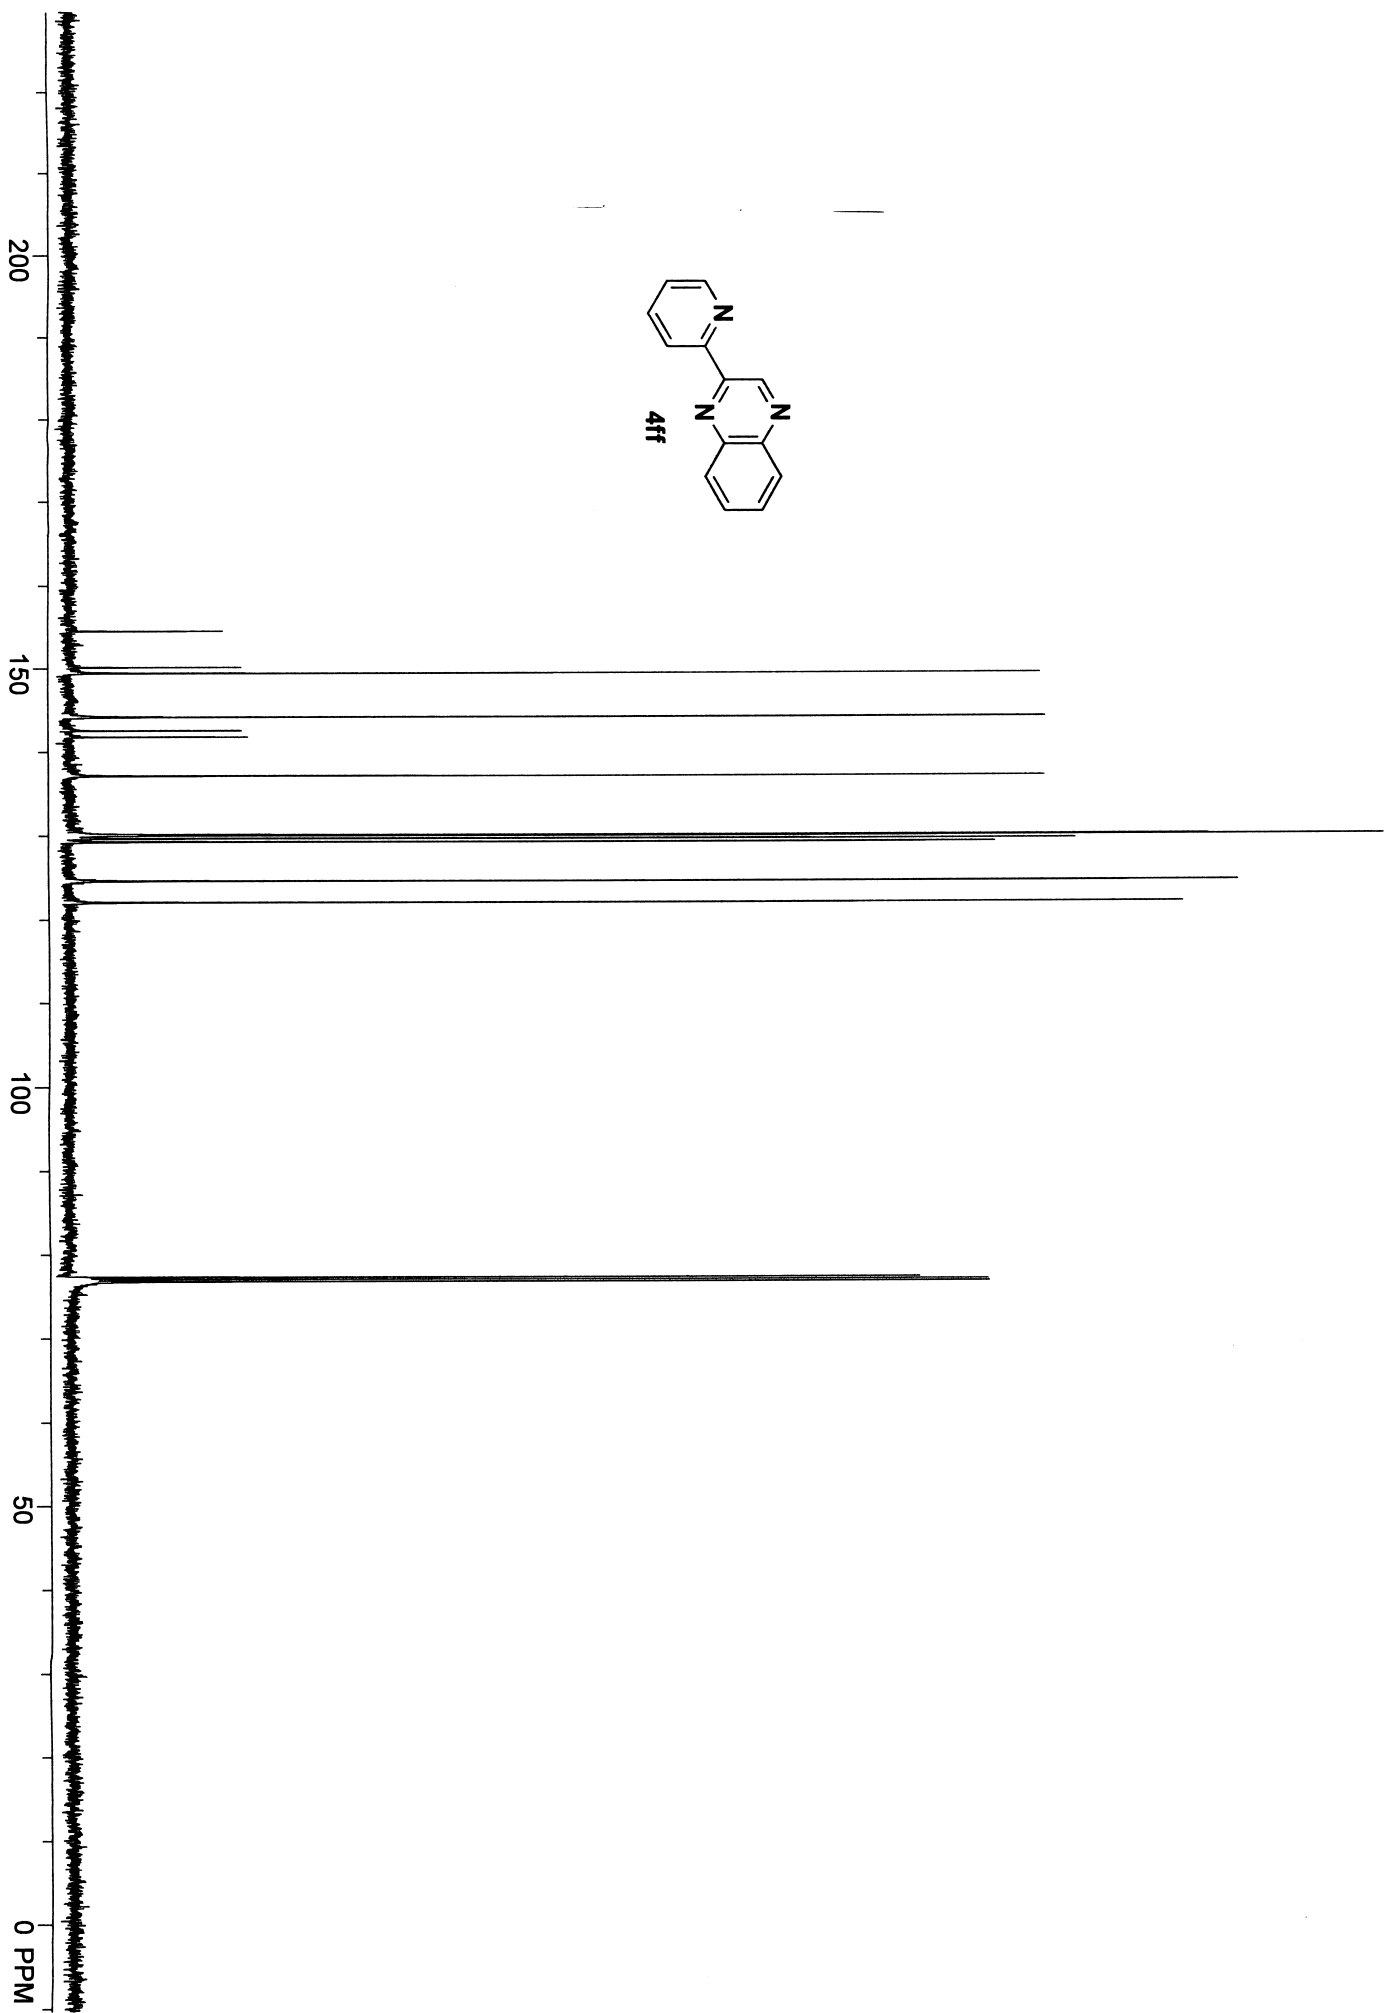



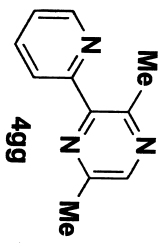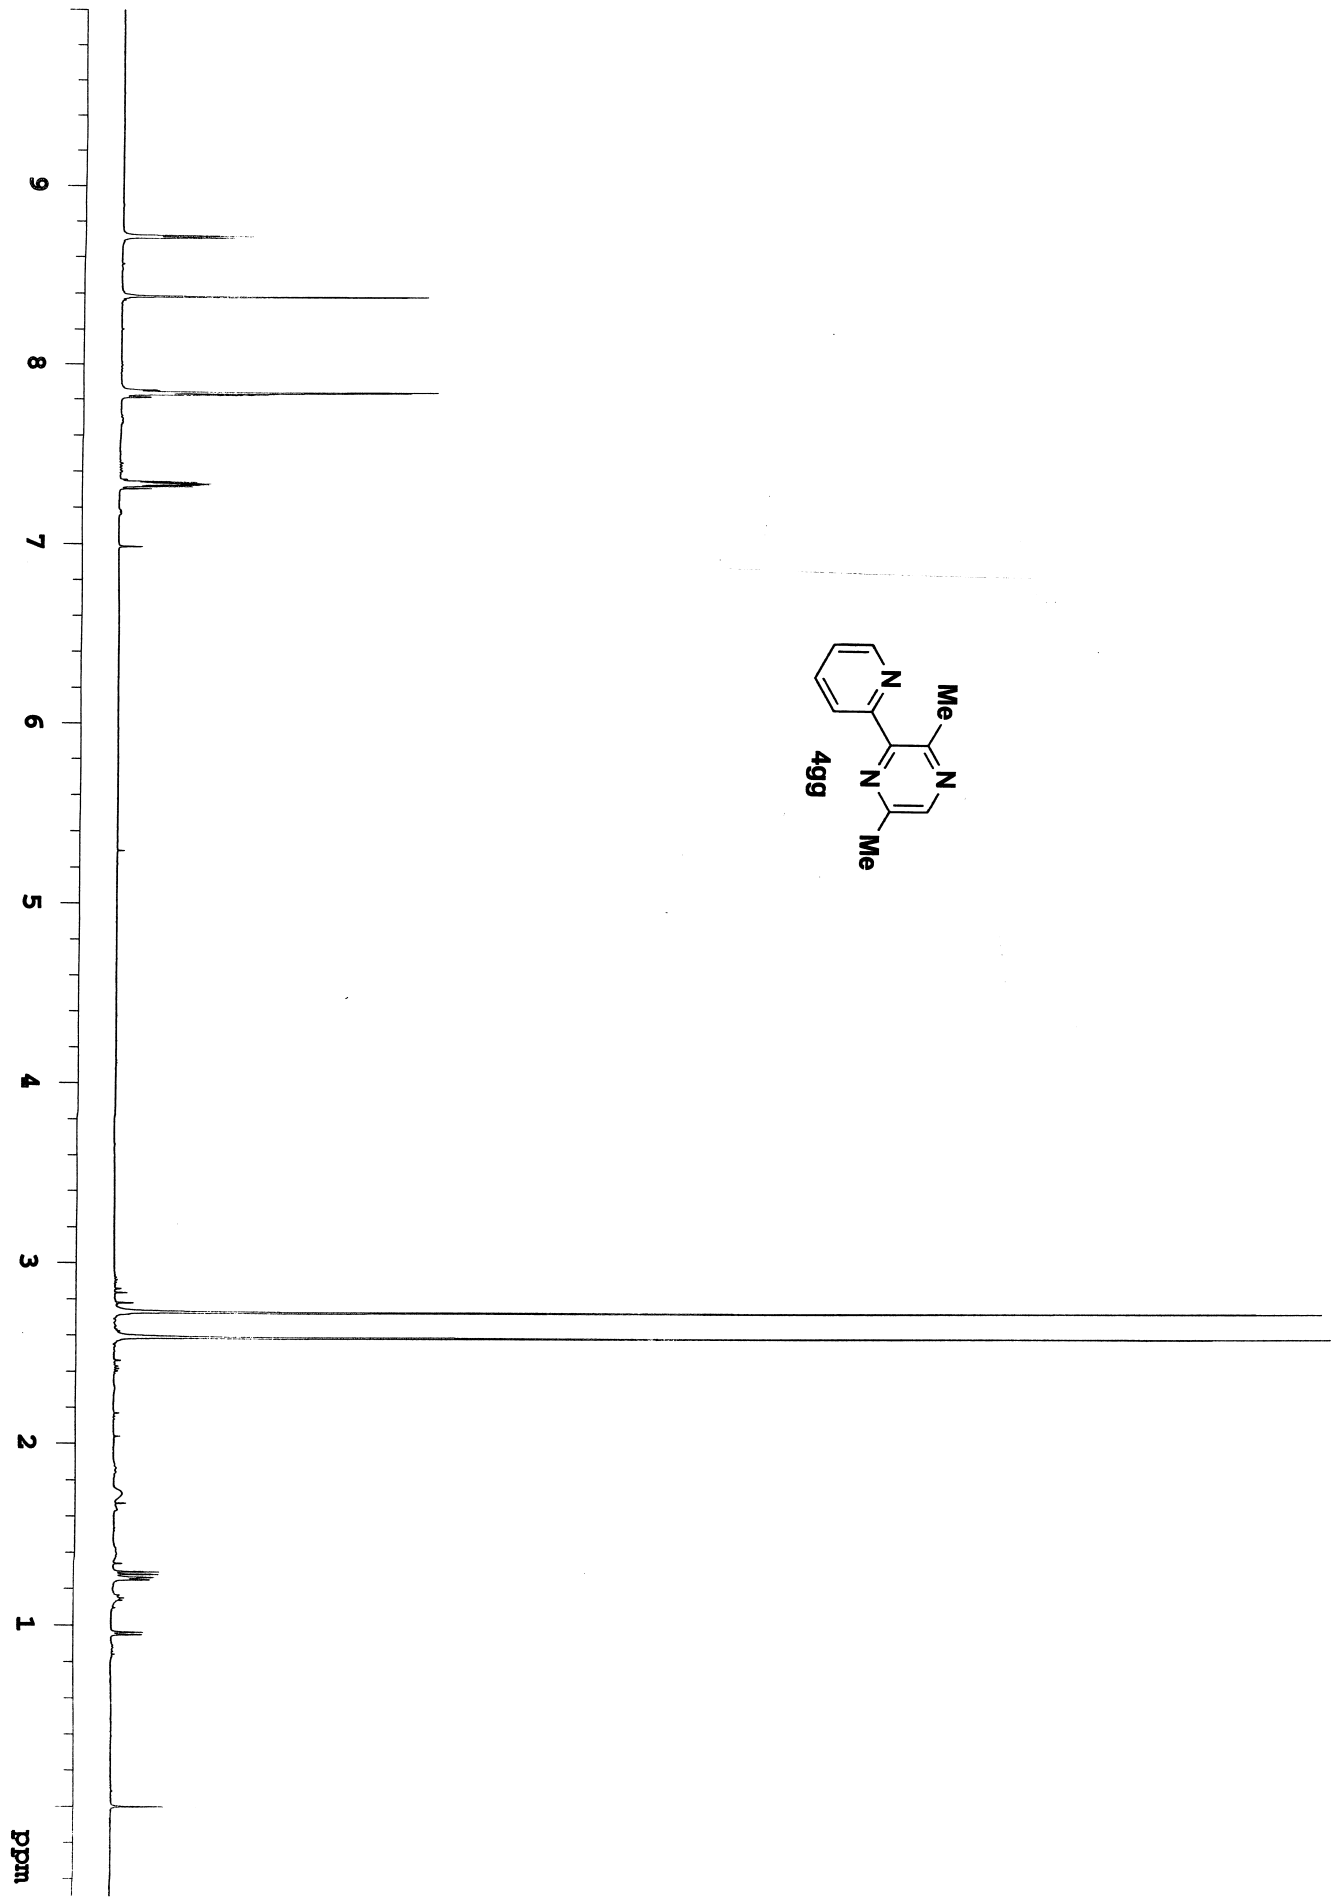

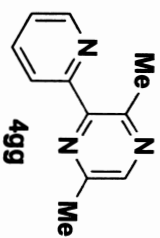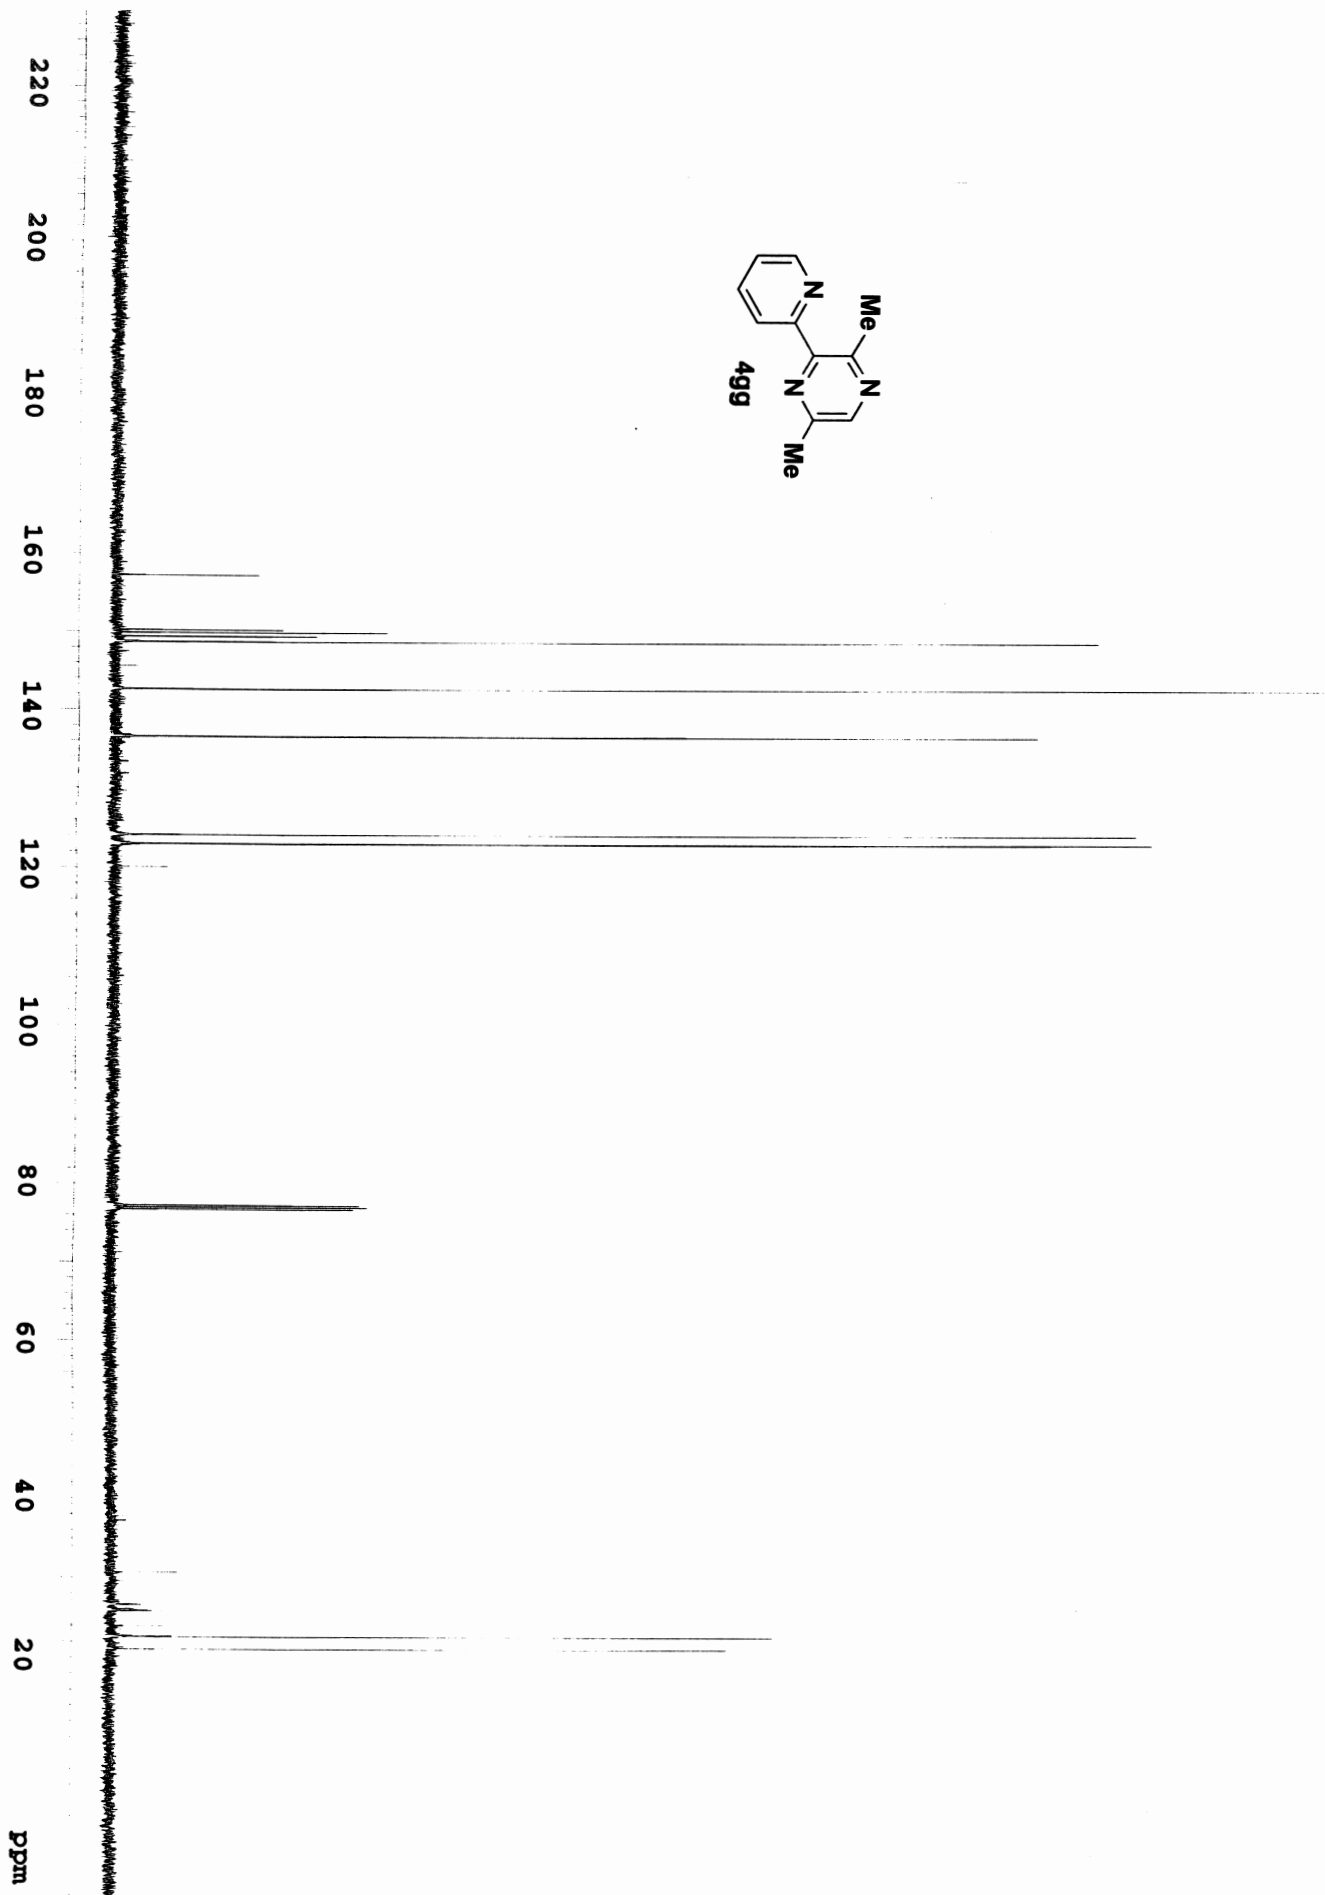

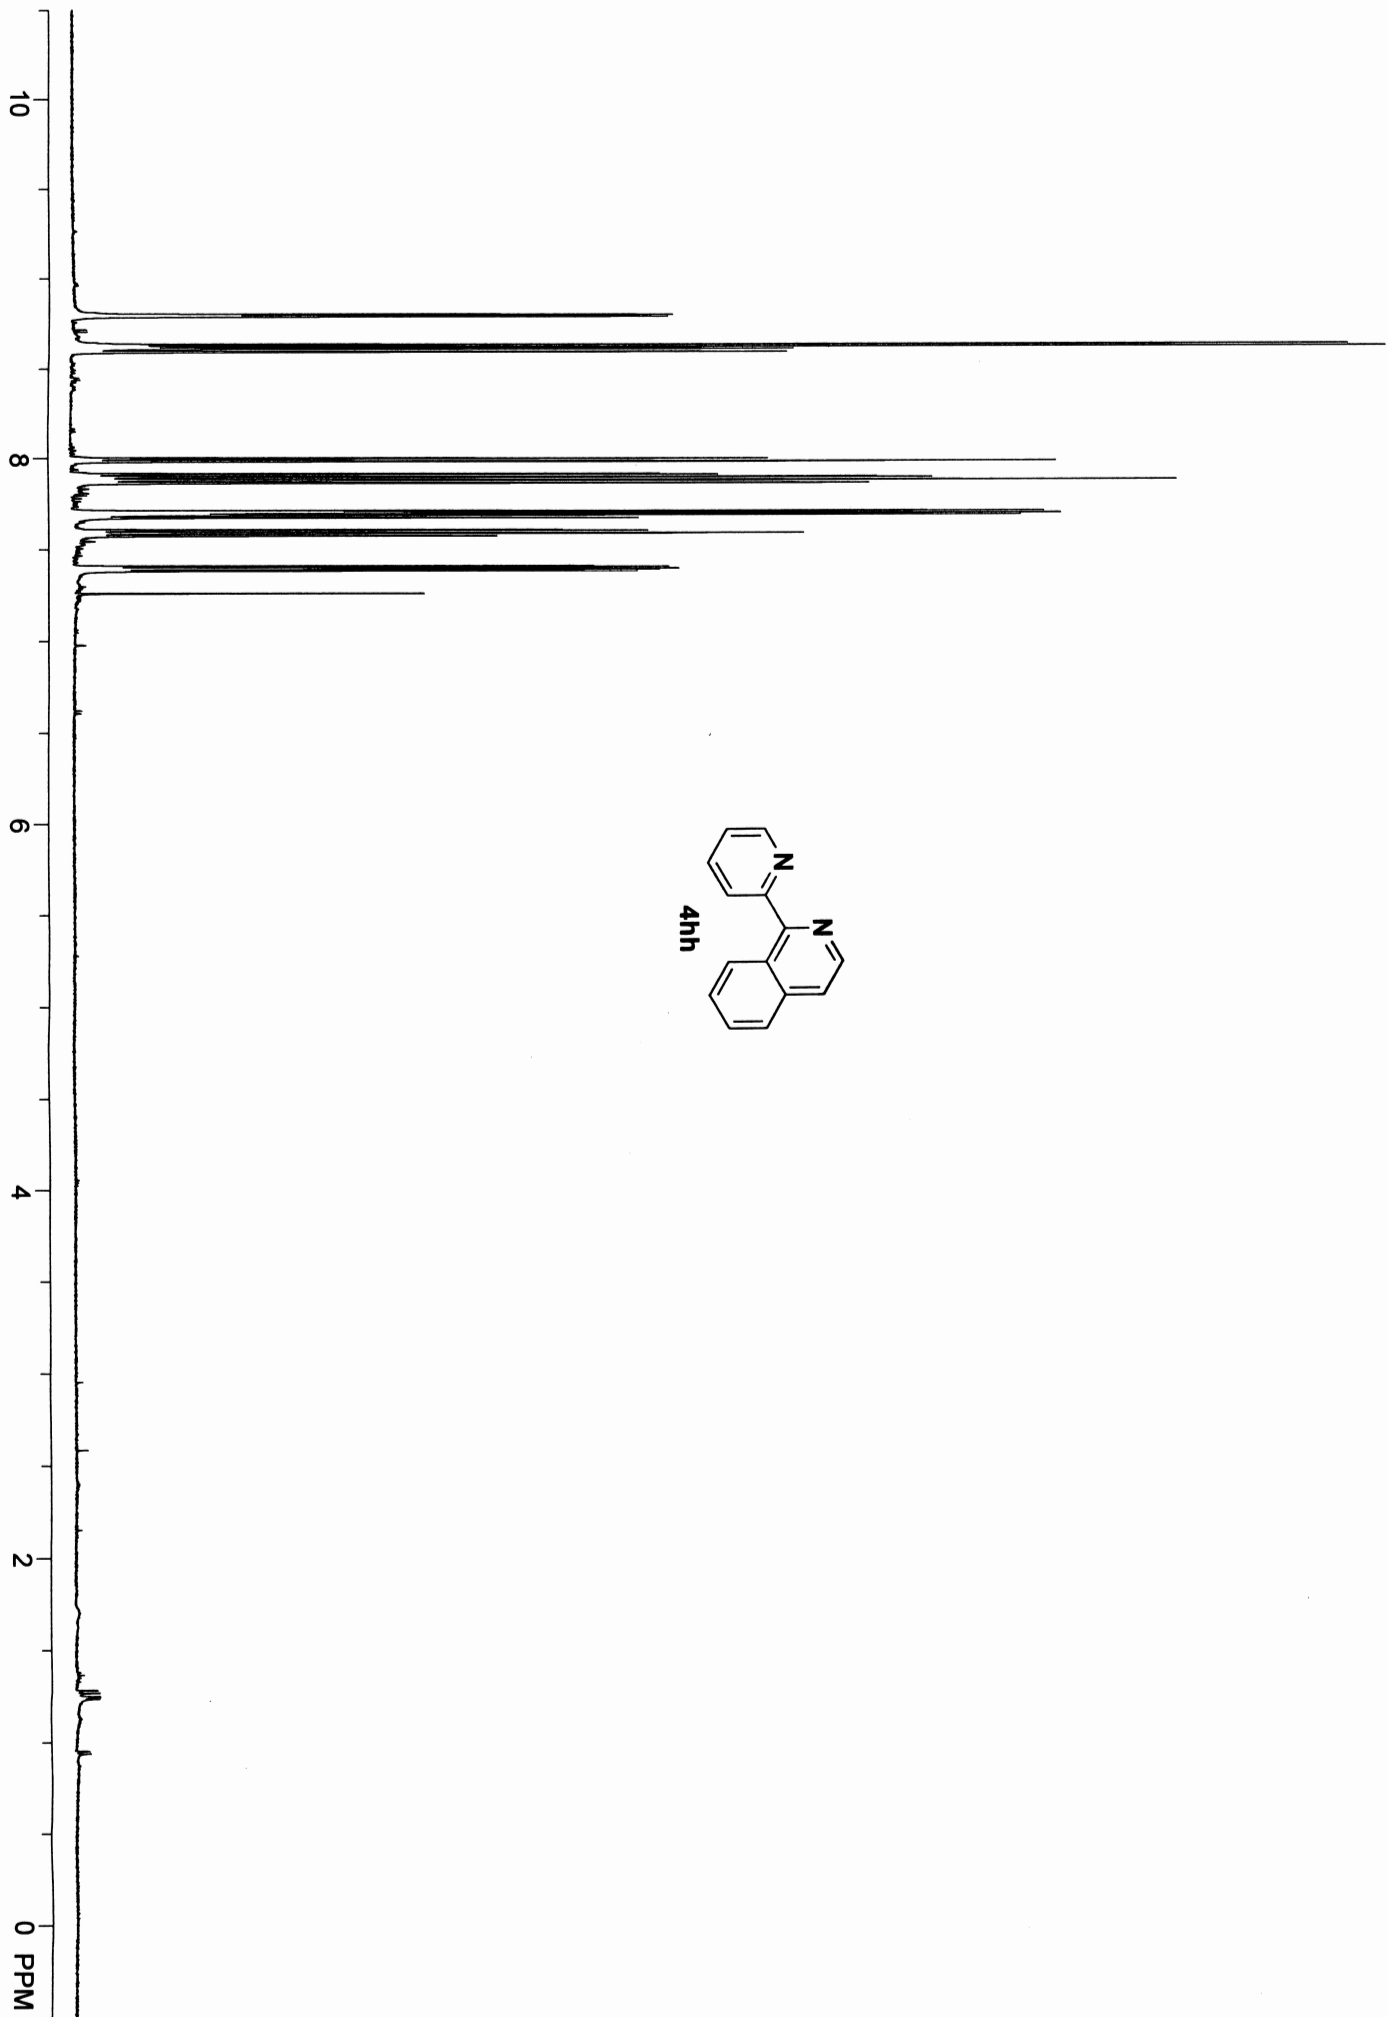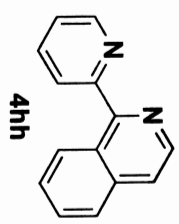

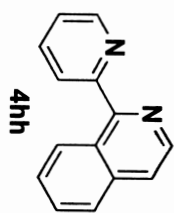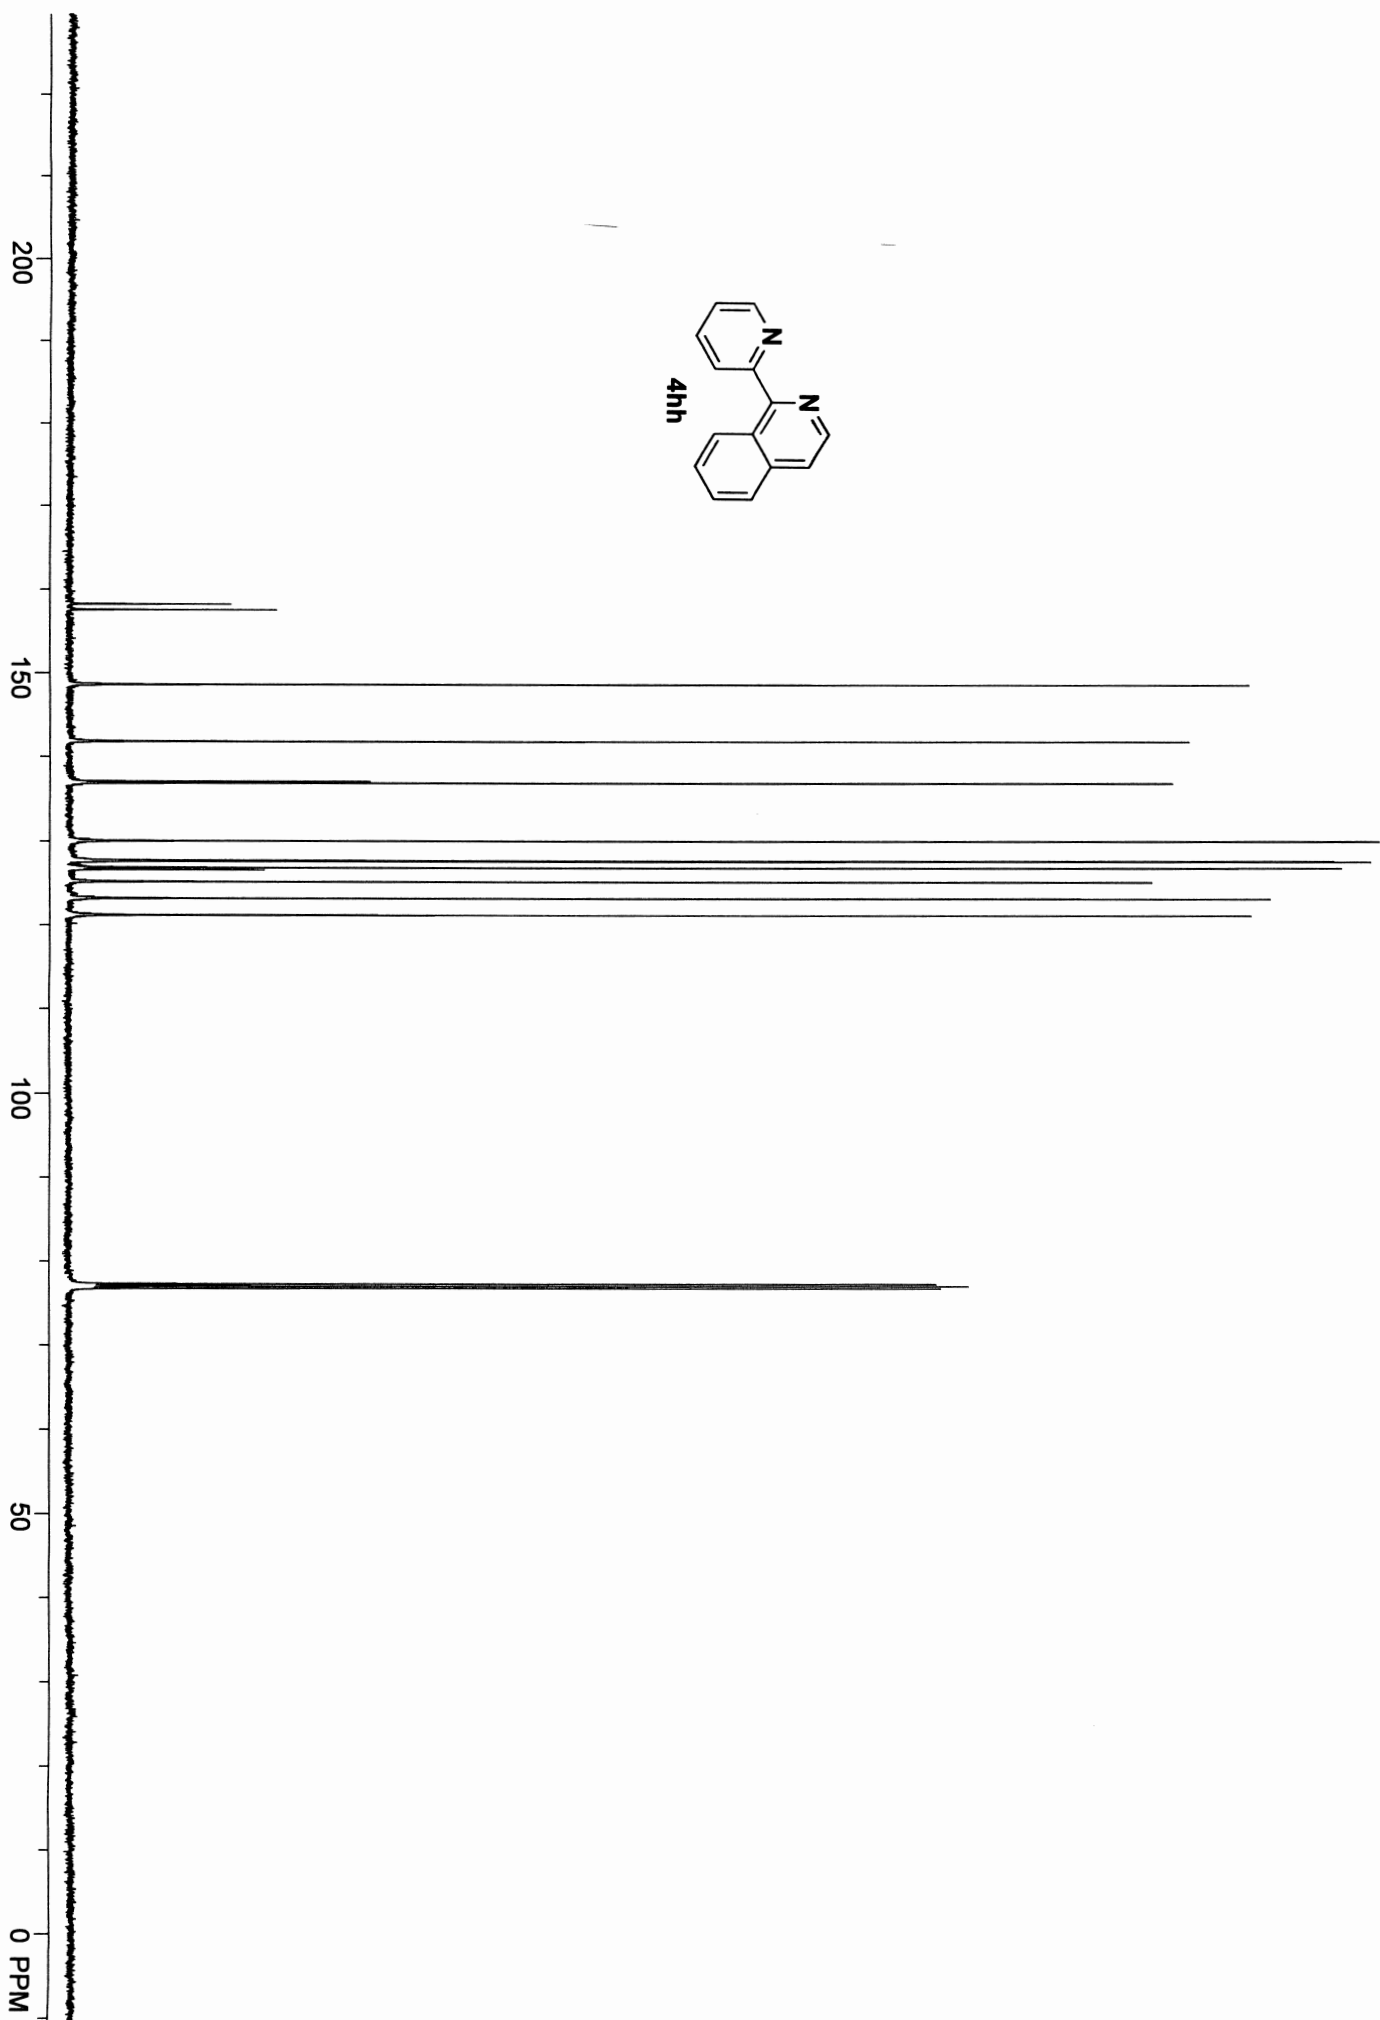

Supplement: NIHMS1578520-supplement-Supporting_Information_2.pdf [file NIHMS1578520-supplement-Supporting_Information_2.pdf]
